# Supplementary material
Source: publisher figshare collection journal article supplement (https://gsajournals.figshare.com/ndownloader/files/25732346)
Supplement: Supplementary file 1 [file 25732346]

## Sheet: Sheet 1
Ensembl_Gene_ID	log2FC_Med14ns	pvalue_Med14ns	adjpvalue_Med14ns	log2FC_Med17ns	pvalue_Med17ns	adjpvalue_Med17ns	log2FC_Med1417ns	pvalue_Med1417ns	adjpvalue_Med1417ns	log2FC_Sua7ns	pvalue_Sua7ns	adjpvalue_Sua7ns	log2FC_Med14tot	pvalue_Med14tot	adjpvalue_Med14tot	log2FC_Med17tot	pvalue_Med17tot	adjpvalue_Med17tot	log2FC_Med1417tot	pvalue_Med1417tot	adjpvalue_Med1417tot	log2FC_Sua7tot	pvalue_Sua7tot	adjpvalue_Sua7tot	Chr	Start	End	Genelength	Strand	Prom	TATAmism	Geneclass	TAFenr	RPGstatus	class
LSR1	-2.36725	4.4864e-62	9.05065e-61	-2.35938	1.28933e-61	6.27201e-61	-2.04696	3.52672e-28	6.76594e-28	-4.3556	1.20254e-62	3.02474e-61	-0.0314125	0.817275	0.84264	-0.4454	0.00104953	0.00156413	-0.2232	0.0912115	0.112004	-0.192259	0.281721	0.330822	chrII	680688	681862	1175	-	sn/snoRNA	sn/snoRNA	sn/snoRNA	NA	NA	NA
NME1	-3.22472	7.47348e-49	8.32152e-48	-2.64594	9.04924e-33	1.72461e-32	-1.96282	1.52417e-20	2.2003e-20	-4.2858	1.85369e-45	6.7581e-45	-0.276583	0.441109	0.500264	0.104189	0.771595	0.810373	-0.463924	0.000651092	0.00090045	-0.798233	8.12186e-05	0.000124053	chrXIV	585587	585926	340	+	sn/snoRNA	sn/snoRNA	sn/snoRNA	NA	NA	NA
snR11	-3.63115	2.0967e-47	2.2125e-46	-3.15454	8.38325e-35	1.67836e-34	-2.84346	5.57508e-27	1.00059e-26	-4.92906	1.78153e-52	1.32407e-51	-0.535339	0.339954	0.399247	0.6515	0.24518	0.292864	-0.600926	0.000865442	0.00118882	-1.17919	7.4652e-06	1.20396e-05	chrXIII	652275	652532	258	+	sn/snoRNA	sn/snoRNA	sn/snoRNA	NA	NA	NA
snR128	-2.78496	1.05792e-34	5.43543e-34	-2.40796	3.3958e-24	5.4167e-24	-2.63582	1.54786e-28	3.0249e-28	-3.75301	2.36609e-24	3.58342e-24	-0.708332	0.157603	0.202407	-1.10912	0.027042	0.0360322	-1.02759	0.000119387	0.000170763	-1.26194	0.0243374	0.0320146	chrX	139566	139691	126	-	sn/snoRNA	sn/snoRNA	sn/snoRNA	NA	NA	NA
snR13	-3.34085	4.93524e-29	1.84876e-28	-2.50121	1.25795e-15	1.77281e-15	-2.48325	1.87502e-16	2.53186e-16	-4.9542	2.67862e-19	3.80299e-19	-1.11046	0.0388189	0.0583399	-0.281925	0.599085	0.652776	-0.823691	0.00167585	0.00227425	-0.60821	0.577767	0.629081	chrIV	1402919	1403042	124	+	sn/snoRNA	sn/snoRNA	sn/snoRNA	NA	NA	NA
snR14	-3.54316	2.00654e-53	2.78037e-52	-3.20521	7.93283e-41	1.87431e-40	-2.84893	3.30066e-20	4.7262e-20	-4.20695	5.47918e-30	9.23841e-30	-1.91235	1.41281e-06	7.70193e-06	-1.17464	0.0016827	0.00246562	-1.37036	0.000177455	0.000251555	-3.55245	2.36559e-11	5.1531e-11	chrV	167427	167586	160	-	sn/snoRNA	sn/snoRNA	sn/snoRNA	NA	NA	NA
snR161	-2.63869	1.37102e-07	1.86843e-07	-2.38816	1.19655e-05	1.51732e-05	-2.4331	3.5151e-06	4.32266e-06	-4.10132	4.05676e-05	5.08585e-05	-0.756277	0.0789069	0.109224	0.0214647	0.959082	0.969007	-0.682842	0.060657	0.0756529	-1.0687	0.229779	0.272923	chrII	307185	307345	161	-	sn/snoRNA	sn/snoRNA	sn/snoRNA	NA	NA	NA
snR17a	-3.34406	2.52704e-12	3.942e-12	-2.42199	3.98478e-07	5.13558e-07	-2.33067	7.84013e-28	1.47459e-27	-4.10054	7.71652e-45	2.64988e-44	-0.30133	0.457892	0.516955	0.220753	0.586544	0.64114	-0.627602	2.00508e-05	2.9595e-05	-0.617706	0.00412782	0.005739	chrXV	780107	780596	490	+	sn/snoRNA	sn/snoRNA	sn/snoRNA	NA	NA	NA
snR17b	-4.39122	4.56885e-77	1.75071e-75	-3.09093	2.66214e-38	5.83561e-38	-2.90928	7.79099e-42	5.2782e-41	-4.10588	1.58425e-33	2.93633e-33	-0.457091	0.341169	0.400361	0.441408	0.357907	0.413179	-0.514353	0.000356974	0.000499625	-0.492893	0.0117632	0.0158609	chrXVI	281056	281517	462	-	sn/snoRNA	sn/snoRNA	sn/snoRNA	NA	NA	NA
snR189	-3.00695	9.37283e-10	1.34438e-09	-3.06219	9.73642e-09	1.27666e-08	-2.39388	1.31767e-06	1.62815e-06	-5.10871	6.54927e-10	8.60094e-10	-0.451482	0.405732	0.465674	0.409393	0.449626	0.50707	-0.34064	0.1228	0.149025	-0.474351	0.387651	0.441695	chrIII	178610	178798	189	-	sn/snoRNA	sn/snoRNA	sn/snoRNA	NA	NA	NA
snR19	-2.9039	1.44988e-51	1.82807e-50	-3.10416	3.10695e-58	1.34621e-57	-2.11956	4.85717e-29	9.78878e-29	-4.30362	7.714e-63	1.98717e-61	-0.0991957	0.46542	0.524274	-0.185018	0.173081	0.211612	-0.0802652	0.574714	0.633624	-0.214273	0.181202	0.217642	chrXIV	230105	230672	568	-	sn/snoRNA	sn/snoRNA	sn/snoRNA	NA	NA	NA
snR190	-3.33957	8.4191e-18	1.68308e-17	-2.5504	6.83117e-11	9.15137e-11	-2.7349	6.60959e-35	2.08909e-34	-4.26461	7.88995e-48	3.53162e-47	-0.185732	0.689619	0.733536	0.271921	0.558609	0.614197	-0.870755	1.33997e-08	2.26679e-08	-0.7464	0.000101069	0.000153546	chrX	139761	139950	190	-	sn/snoRNA	sn/snoRNA	sn/snoRNA	NA	NA	NA
snR3	-3.45813	1.58433e-38	1.00434e-37	-3.16712	8.48016e-30	1.51118e-29	-2.03549	2.01531e-09	2.55176e-09	-5.14574	6.50666e-32	1.14941e-31	-0.662575	0.243634	0.297934	0.62997	0.26713	0.316999	-0.531346	0.0064196	0.00846851	-0.782775	0.0153015	0.0204459	chrX	663749	663942	194	+	sn/snoRNA	sn/snoRNA	sn/snoRNA	NA	NA	NA
snR30	-2.2891	1.63587e-08	2.27502e-08	-1.51852	0.000180437	0.00022539	-1.57146	4.69844e-16	6.31005e-16	-3.79574	1.92314e-44	6.39559e-44	0.137504	0.334713	0.393468	-0.249594	0.0797983	0.101866	-0.14316	0.329764	0.38056	-0.0934227	0.572135	0.623469	chrXII	198784	199389	606	+	sn/snoRNA	sn/snoRNA	sn/snoRNA	NA	NA	NA
snR31	-4.00633	8.98793e-40	6.14026e-39	-3.1436	5.5098e-23	8.63613e-23	-3.14713	4.31022e-28	8.21969e-28	-4.96045	1.95276e-22	2.88233e-22	-0.48807	0.399261	0.459479	1.01394	0.0798301	0.101887	-0.827184	5.77633e-06	8.7335e-06	-1.21565	6.31386e-05	9.6869e-05	chrXV	841958	842182	225	-	sn/snoRNA	sn/snoRNA	sn/snoRNA	NA	NA	NA
snR32	-3.31428	1.61107e-22	4.12633e-22	-3.48381	7.42832e-21	1.12698e-20	-2.33868	4.15433e-08	5.2139e-08	-3.99264	6.06966e-14	8.20609e-14	-0.441297	0.433053	0.492463	0.435583	0.438513	0.496249	-0.487539	0.031027	0.0394064	-0.650744	0.235494	0.279203	chrVIII	381540	381727	188	+	sn/snoRNA	sn/snoRNA	sn/snoRNA	NA	NA	NA
snR33	-2.79945	1.59522e-28	5.78617e-28	-2.32089	6.23772e-19	9.19899e-19	-2.63561	1.39081e-19	1.97004e-19	-4.3251	1.03769e-24	1.57867e-24	-0.492004	0.308348	0.366349	0.193235	0.688694	0.733314	-0.758456	3.45123e-05	5.05849e-05	-0.787933	0.02571	0.0337295	chrIII	142364	142546	183	-	sn/snoRNA	sn/snoRNA	sn/snoRNA	NA	NA	NA
snR34	-2.71527	9.52127e-23	2.46998e-22	-2.53728	9.93515e-19	1.46109e-18	-2.03461	2.3834e-14	3.14612e-14	-4.37221	2.23815e-25	3.44303e-25	-0.490421	0.344146	0.403461	0.273061	0.598219	0.652159	-0.436651	0.00699423	0.00921164	-0.618109	0.0149137	0.0199441	chrXII	899180	899382	203	+	sn/snoRNA	sn/snoRNA	sn/snoRNA	NA	NA	NA
snR35	-2.54943	1.22667e-21	2.97514e-21	-1.77124	1.2879e-10	1.72096e-10	-2.05209	2.56616e-13	3.34589e-13	-3.52712	6.7255e-20	9.63583e-20	-0.112614	0.830194	0.85391	0.259029	0.621755	0.672994	-0.472777	0.0158867	0.020517	-0.467273	0.158193	0.191381	chrXV	759326	759529	204	-	sn/snoRNA	sn/snoRNA	sn/snoRNA	NA	NA	NA
snR36	-1.99923	3.6211e-09	5.11367e-09	-2.39947	1.13905e-10	1.52295e-10	-2.42481	9.26802e-16	1.24048e-15	-3.97621	2.86887e-12	3.83711e-12	-0.777709	0.0598767	0.0855272	-0.231537	0.571665	0.626447	-1.29134	5.9856e-05	8.69106e-05	-1.97207	0.0124425	0.0167527	chrXV	680685	680866	182	-	sn/snoRNA	sn/snoRNA	sn/snoRNA	NA	NA	NA
snR37	-2.31148	6.47019e-08	8.88113e-08	-2.40527	1.88512e-08	2.46286e-08	-1.81978	4.69713e-21	6.87553e-21	-4.15219	3.65221e-58	5.4468e-57	-0.201609	0.257291	0.312887	0.0160853	0.92796	0.943393	-0.139676	0.373663	0.428339	-0.605441	0.00296445	0.00414628	chrX	228094	228479	386	-	sn/snoRNA	sn/snoRNA	sn/snoRNA	NA	NA	NA
snR39B	-3.02609	4.05603e-28	1.42668e-27	-3.3274	3.61641e-30	6.50536e-30	-2.68613	1.9824e-30	4.34225e-30	-5.61595	3.57485e-29	5.91364e-29	-1.82651	1.31175e-07	9.65431e-07	-1.41523	4.19104e-05	6.94542e-05	-2.40734	5.43007e-22	2.06615e-21	-4.43651	6.52984e-08	1.16967e-07	chrVII	366374	366469	96	-	sn/snoRNA	sn/snoRNA	sn/snoRNA	NA	NA	NA
snR4	-2.71046	3.97976e-26	1.25852e-25	-1.66107	1.57983e-10	2.109e-10	-1.75052	1.01245e-10	1.29466e-10	-3.13197	1.1221e-18	1.5808e-18	-0.441505	0.420178	0.480238	0.615131	0.261229	0.31056	-0.739181	0.000617653	0.000855293	-1.09828	0.00205657	0.00290828	chrV	424698	424883	186	+	sn/snoRNA	sn/snoRNA	sn/snoRNA	NA	NA	NA
snR40	-3.32016	3.0777e-26	9.7762e-26	-2.31633	1.01252e-12	1.38344e-12	-2.97309	1.61722e-28	3.15586e-28	-5.14302	1.01214e-22	1.50151e-22	-1.08405	0.0296522	0.0457763	-2.01349	6.5477e-05	0.000106645	-2.04136	5.35406e-09	9.18846e-09	-3.7035	4.16525e-07	7.14324e-07	chrXIV	89210	89306	97	+	sn/snoRNA	sn/snoRNA	sn/snoRNA	NA	NA	NA
snR41	-2.19709	1.14935e-13	1.88327e-13	-1.91321	5.70268e-10	7.55985e-10	-1.96794	7.30854e-13	9.49968e-13	-3.83436	3.91972e-13	5.27086e-13	-0.451559	0.239796	0.293724	-0.219905	0.559469	0.614936	-0.612768	0.0507366	0.0636453	-0.674224	0.232746	0.276253	chrXVI	719148	719242	95	-	sn/snoRNA	sn/snoRNA	sn/snoRNA	NA	NA	NA
snR42	-2.7946	1.72311e-37	1.03402e-36	-2.39008	2.52058e-27	4.24888e-27	-2.2631	5.64341e-25	9.2273e-25	-4.25943	3.41647e-57	4.40017e-56	-0.434684	0.26421	0.320237	0.239065	0.538948	0.595982	-0.317717	0.0762344	0.0942698	-0.682453	0.0679829	0.0859606	chrXI	559016	559366	351	-	sn/snoRNA	sn/snoRNA	sn/snoRNA	NA	NA	NA
snR43	-2.88007	4.27876e-26	1.35182e-25	-2.46552	3.65582e-17	5.26239e-17	-2.84996	6.65989e-20	9.47557e-20	-4.75384	7.01974e-24	1.05649e-23	-0.599142	0.289015	0.346116	0.336213	0.551262	0.607652	-1.10366	3.47803e-07	5.51309e-07	-0.694733	0.105375	0.130335	chrIII	107504	107712	209	-	sn/snoRNA	sn/snoRNA	sn/snoRNA	NA	NA	NA
snR45	-3.85318	5.03498e-49	5.70825e-48	-3.30379	1.2149e-33	2.36801e-33	-2.37197	2.62637e-12	3.39469e-12	-5.11247	2.53835e-42	7.25043e-42	-1.02907	0.0620276	0.0882565	0.33079	0.547487	0.604113	-0.485817	0.0162695	0.020999	-2.32888	1.16181e-10	2.4232e-10	chrXVI	821732	821903	172	+	sn/snoRNA	sn/snoRNA	sn/snoRNA	NA	NA	NA
snR46	-2.24391	3.38576e-18	6.8768e-18	-2.64007	7.89563e-23	1.23588e-22	-2.44568	8.72455e-31	1.95378e-30	-3.87365	1.12181e-34	2.16741e-34	-0.273631	0.571636	0.6245	-0.129807	0.788373	0.82442	-0.860733	2.89042e-08	4.82083e-08	-0.888747	0.000326116	0.000482954	chrVII	545370	545566	197	+	sn/snoRNA	sn/snoRNA	sn/snoRNA	NA	NA	NA
snR47	-3.19539	2.70027e-34	1.35985e-33	-2.54362	2.05727e-20	3.10333e-20	-3.29655	7.29294e-34	2.10654e-33	-4.22033	1.43853e-24	2.18453e-24	-1.14828	0.000601564	0.00149847	-1.27356	0.000181696	0.000285828	-1.69896	3.05458e-07	4.8513e-07	-0.356922	0.556331	0.608893	chrIV	541602	541700	99	-	sn/snoRNA	sn/snoRNA	sn/snoRNA	NA	NA	NA
snR48	-3.57946	1.7904e-26	5.74117e-26	-2.04301	3.07753e-09	4.05159e-09	-3.32068	6.04949e-16	8.11803e-16	-5.16353	2.39083e-16	3.30597e-16	-1.39713	0.00639691	0.0117773	-1.50196	0.0027691	0.00399045	-2.30932	0.00286744	0.0038433	-4.15794	6.20119e-05	9.52075e-05	chrVII	609584	609696	113	+	sn/snoRNA	sn/snoRNA	sn/snoRNA	NA	NA	NA
snR49	-3.57722	7.26801e-33	3.35022e-32	-3.39331	9.43363e-27	1.57281e-26	-3.51035	5.78405e-26	9.92743e-26	-5.22143	3.59327e-29	5.94264e-29	-1.29599	3.4156e-05	0.00012557	-0.48404	0.108427	0.136075	-0.0945496	0.83578	0.858568	-1.03205	0.0128149	0.0172399	chrXIV	716120	716284	165	+	sn/snoRNA	sn/snoRNA	sn/snoRNA	NA	NA	NA
snR5	-2.66223	3.91623e-21	9.24981e-21	-2.97284	4.54696e-24	7.23442e-24	-2.47239	9.94589e-23	1.51952e-22	-3.82093	1.24271e-22	1.83911e-22	-0.509433	0.257314	0.312887	0.719946	0.108799	0.136463	-0.559961	0.0021997	0.00296661	-0.629328	0.0584614	0.0742667	chrXV	842403	842606	204	+	sn/snoRNA	sn/snoRNA	sn/snoRNA	NA	NA	NA
snR50	-2.30741	4.70276e-09	6.6221e-09	-2.25515	1.29035e-07	1.67212e-07	-2.7597	6.01198e-11	7.69805e-11	-4.19896	1.83306e-10	2.41813e-10	-0.912585	0.073041	0.102044	-1.33263	0.00849675	0.0117848	-1.16446	0.0190202	0.024462	-1.89925	0.0290631	0.0379631	chrXV	259489	259578	90	+	sn/snoRNA	sn/snoRNA	sn/snoRNA	NA	NA	NA
snR51	-2.02543	5.56221e-10	8.04199e-10	-1.95824	1.71611e-08	2.24419e-08	-1.95706	1.83548e-16	2.47946e-16	-3.08136	1.70362e-08	2.21019e-08	-0.242638	0.590565	0.641914	-0.772091	0.0897188	0.113709	-1.22788	0.000380337	0.000531526	-1.53997	0.0736348	0.0927116	chrXVI	718700	718806	107	-	sn/snoRNA	sn/snoRNA	sn/snoRNA	NA	NA	NA
snR53	-0.656071	0.410208	0.458468	-1.47115	0.0782585	0.0906102	-1.67209	0.0189577	0.0220363	-2.0451	0.138526	0.158864	0.334527	0.557747	0.611771	-0.798692	0.152906	0.188496	-0.347719	0.551731	0.61035	-0.0347325	0.967734	0.969369	chrV	61699	61789	91	+	sn/snoRNA	sn/snoRNA	sn/snoRNA	NA	NA	NA
snR55	-2.39207	3.59109e-16	6.59472e-16	-1.94473	9.89271e-11	1.32372e-10	-2.51467	3.14537e-30	6.81176e-30	-3.80724	3.83334e-24	5.78606e-24	-1.62724	0.000438409	0.00114565	-1.10122	0.0153078	0.0207994	-1.98269	1.3126e-09	2.30919e-09	-3.14717	4.71327e-09	8.95947e-09	chrXII	794697	794794	98	-	sn/snoRNA	sn/snoRNA	sn/snoRNA	NA	NA	NA
snR56	-2.28535	4.45528e-09	6.27878e-09	-1.75738	2.55491e-05	3.2255e-05	-2.85351	1.82369e-16	2.46404e-16	-4.23445	4.67974e-11	6.19767e-11	-1.57392	0.00422129	0.00820647	-0.748171	0.159269	0.195933	-1.70066	0.0250283	0.0319558	-1.87137	0.0124958	0.016821	chrII	88190	88277	88	+	sn/snoRNA	sn/snoRNA	sn/snoRNA	NA	NA	NA
snR57	-2.45243	3.86649e-20	8.67525e-20	-2.26285	1.38343e-16	1.97687e-16	-1.98874	7.09374e-16	9.50604e-16	-4.62775	2.10791e-45	7.63536e-45	-1.47853	1.21948e-05	5.13496e-05	-1.34204	5.27134e-05	8.66328e-05	-1.80282	7.26538e-09	1.2413e-08	-3.57977	3.5692e-14	9.28163e-14	chrXII	794937	795024	88	-	sn/snoRNA	sn/snoRNA	sn/snoRNA	NA	NA	NA
snR58	-2.61223	5.96325e-06	7.88091e-06	-2.04439	0.00122244	0.00150506	-1.97224	0.0109175	0.0127745	-3.5778	0.000707169	0.000872443	-1.21909	0.040659	0.0606506	-0.276557	0.642838	0.692604	-1.76287	0.0675235	0.083832	-1.21567	0.333968	0.386126	chrXV	136088	136183	96	-	sn/snoRNA	sn/snoRNA	sn/snoRNA	NA	NA	NA
snR60	-2.1096	0.00152865	0.00192952	-1.16516	0.0968391	0.111427	-2.47865	1.99357e-05	2.4293e-05	-3.46292	0.00369705	0.00449852	-0.66478	0.240382	0.294382	-0.772284	0.175648	0.214549	-1.90873	0.0424947	0.0535643	-1.20709	0.321616	0.373767	chrX	349130	349233	104	-	sn/snoRNA	sn/snoRNA	sn/snoRNA	NA	NA	NA
snR61	-0.676224	0.0416663	0.0504838	-0.520761	0.133979	0.152708	-1.58443	2.29375e-07	2.85579e-07	-2.66797	1.19123e-07	1.53657e-07	0.285246	0.46976	0.528371	0.157865	0.683263	0.729082	-0.729473	0.114433	0.139312	-0.468546	0.386729	0.440798	chrXII	794486	794575	90	-	sn/snoRNA	sn/snoRNA	sn/snoRNA	NA	NA	NA
snR62	-2.6012	1.56599e-22	4.01538e-22	-2.49382	5.4327e-19	8.02216e-19	-2.75435	1.65722e-24	2.6636e-24	-3.52171	1.74597e-17	2.43676e-17	-1.51539	9.68954e-05	0.000312571	-0.930638	0.0128389	0.0175542	-2.10945	1.50754e-06	2.33234e-06	-1.44115	0.047185	0.0606505	chrXV	409765	409864	100	-	sn/snoRNA	sn/snoRNA	sn/snoRNA	NA	NA	NA
snR63	-2.41701	4.84112e-25	1.42512e-24	-2.66784	1.1649e-28	2.02639e-28	-2.19745	1.71361e-24	2.75087e-24	-3.79285	2.3871e-36	4.90594e-36	-0.360669	0.461848	0.5207	0.567186	0.24708	0.294865	-0.393766	0.0345149	0.0437171	-0.837119	0.000796206	0.00115422	chrIV	323217	323471	255	-	sn/snoRNA	sn/snoRNA	sn/snoRNA	NA	NA	NA
snR64	-2.79435	5.95399e-14	9.90022e-14	-2.5645	3.04291e-10	4.04404e-10	-2.82283	1.2344e-15	1.64988e-15	-3.97278	4.66785e-17	6.48917e-17	-1.13981	0.00622661	0.0115096	-1.80325	2.36994e-05	4.0046e-05	-2.47912	1.1295e-07	1.83501e-07	-2.13235	0.000518027	0.000758208	chrXI	38811	38911	101	+	sn/snoRNA	sn/snoRNA	sn/snoRNA	NA	NA	NA
snR65	-1.69499	0.000805828	0.00102355	-3.05755	2.01994e-07	2.61213e-07	-3.46481	4.7906e-09	6.05323e-09	-3.88092	7.15313e-07	9.16194e-07	-0.359973	0.538196	0.593575	-0.029853	0.959655	0.969425	-1.4286	0.0599606	0.0748348	-2.78173	0.0111906	0.0151202	chrIII	177183	177282	100	+	sn/snoRNA	sn/snoRNA	sn/snoRNA	NA	NA	NA
snR66	-2.25664	4.15579e-12	6.42718e-12	-0.898844	0.00881096	0.0106268	-0.995539	1.24113e-05	1.51681e-05	-3.44262	1.2355e-11	1.6466e-11	-0.600405	0.109676	0.146519	-0.278434	0.462933	0.519479	-0.373641	0.23305	0.27434	-1.33271	0.0245748	0.0323139	chrXIV	586090	586175	86	+	sn/snoRNA	sn/snoRNA	sn/snoRNA	NA	NA	NA
snR67	-2.54003	1.18927e-33	5.72434e-33	-2.63947	2.99644e-34	5.91781e-34	-3.78175	1.23448e-57	6.78663e-56	-4.84311	3.84269e-50	2.20456e-49	-1.10623	8.86765e-06	3.8779e-05	-1.15992	1.46023e-06	2.77818e-06	-2.10352	7.86354e-15	1.77967e-14	-2.0775	5.34641e-14	1.37119e-13	chrV	61352	61433	82	+	sn/snoRNA	sn/snoRNA	sn/snoRNA	NA	NA	NA
snR68	-3.08757	7.23443e-31	2.99824e-30	-3.49351	1.98709e-35	4.03836e-35	-3.09091	4.114e-46	4.75734e-45	-4.54797	6.93483e-32	1.22376e-31	-1.78797	7.65532e-06	3.43518e-05	-1.69829	1.86019e-05	3.17358e-05	-2.6553	1.0086e-22	4.03316e-22	-3.59167	4.45775e-13	1.076e-12	chrIX	97111	97246	136	+	sn/snoRNA	sn/snoRNA	sn/snoRNA	NA	NA	NA
snR69	-2.17929	4.05334e-10	5.88648e-10	-1.98855	7.48509e-07	9.62149e-07	-2.47116	1.63945e-06	2.02278e-06	-3.86142	9.16711e-08	1.18405e-07	-0.702191	0.129698	0.170365	0.103913	0.821488	0.851696	-1.45395	0.00651568	0.00859179	-1.08942	0.232864	0.276336	chrXI	364776	364876	101	+	sn/snoRNA	sn/snoRNA	sn/snoRNA	NA	NA	NA
snR70	-2.03319	2.70941e-21	6.44377e-21	-1.85573	5.05427e-17	7.26471e-17	-1.9287	1.16517e-18	1.62032e-18	-3.71332	2.43863e-25	3.74973e-25	-0.610457	0.111017	0.14808	-0.434474	0.25356	0.301827	-0.419792	0.00865582	0.0113473	-0.933854	0.000289745	0.000430459	chrXVI	718887	719050	164	-	sn/snoRNA	sn/snoRNA	sn/snoRNA	NA	NA	NA
snR71	-1.56335	1.74572e-07	2.37247e-07	-1.65574	1.51141e-07	1.95673e-07	-3.16917	1.28366e-26	2.26388e-26	-2.89857	1.98919e-11	2.64637e-11	-0.168245	0.650869	0.697999	-0.0513308	0.889956	0.912089	-2.72094	9.212e-09	1.56895e-08	-0.272688	0.599178	0.65109	chrVIII	411228	411317	90	+	sn/snoRNA	sn/snoRNA	sn/snoRNA	NA	NA	NA
snR72	-0.585963	0.38708	0.434531	0.633954	0.379306	0.413553	-0.849299	0.101957	0.116001	-2.71074	0.0681596	0.0795608	0.527125	0.372483	0.432215	1.49573	0.0119321	0.0163623	-0.128905	0.884685	0.901559	-0.156689	0.903003	0.916196	chrXIII	298554	298651	98	+	sn/snoRNA	sn/snoRNA	sn/snoRNA	NA	NA	NA
snR74	-0.990944	0.0547583	0.0660548	-0.632331	0.235534	0.262474	-0.856252	0.00715301	0.00840933	-4.41386	6.81033e-06	8.63428e-06	-0.209441	0.719328	0.759037	0.152707	0.793066	0.827923	-0.635527	0.405626	0.462377	-0.786877	0.52805	0.582929	chrXIII	298138	298225	88	+	sn/snoRNA	sn/snoRNA	sn/snoRNA	NA	NA	NA
snR75	-1.5609	0.000953032	0.00120851	-1.80266	0.000215995	0.000269414	-2.17467	1.04732e-12	1.35894e-12	-3.43813	7.09363e-06	8.99175e-06	-0.226692	0.695994	0.739009	-0.446358	0.438381	0.496185	-1.21054	0.00884971	0.0115851	-2.80494	0.0286478	0.0374356	chrXIII	297918	298006	89	+	sn/snoRNA	sn/snoRNA	sn/snoRNA	NA	NA	NA
snR76	-2.46962	8.49774e-20	1.87837e-19	-2.38454	2.94505e-17	4.2455e-17	-2.58285	3.48036e-38	1.55205e-37	-4.42981	2.84407e-20	4.09656e-20	-1.24988	0.00202378	0.00432701	-0.552519	0.16522	0.202683	-2.29205	4.63265e-18	1.29539e-17	-2.65937	2.01026e-05	3.18149e-05	chrXIII	297725	297833	109	+	sn/snoRNA	sn/snoRNA	sn/snoRNA	NA	NA	NA
snR77	-2.71076	1.50864e-21	3.6359e-21	-2.48642	1.38877e-16	1.98408e-16	-3.37079	1.26845e-42	9.45274e-42	-4.68925	1.75685e-26	2.75353e-26	-1.50205	0.000550571	0.00139393	-1.58621	0.000174844	0.000275513	-1.74712	3.80388e-05	5.56286e-05	-3.93285	7.10468e-09	1.33844e-08	chrXIII	297506	297593	88	+	sn/snoRNA	sn/snoRNA	sn/snoRNA	NA	NA	NA
snR78	-3.1984	6.33013e-17	1.20707e-16	-2.60177	1.43864e-10	1.92202e-10	-3.03611	5.43924e-20	7.75036e-20	-4.97049	6.37321e-19	9.01612e-19	-1.45309	0.00406691	0.00795263	-0.744301	0.130189	0.161803	-1.42058	0.00664608	0.00875842	-3.69679	5.09253e-08	9.15225e-08	chrXIII	297278	297364	87	+	sn/snoRNA	sn/snoRNA	sn/snoRNA	NA	NA	NA
snR79	-2.26501	7.4452e-12	1.13912e-11	-2.89211	1.33274e-15	1.87706e-15	-3.23657	1.71097e-19	2.41997e-19	-3.99823	9.329e-12	1.24405e-11	-1.2167	0.00868005	0.0153826	-1.05535	0.0230652	0.0308715	-2.49971	1.12616e-05	1.67741e-05	-0.691327	0.383106	0.437279	chrXII	348427	348510	84	-	sn/snoRNA	sn/snoRNA	sn/snoRNA	NA	NA	NA
snR8	-3.64503	6.79984e-37	3.96937e-36	-2.6653	3.03512e-19	4.50311e-19	-2.32017	8.41418e-13	1.09283e-12	-5.14771	2.90303e-12	3.88127e-12	-0.764403	0.167978	0.214403	0.597894	0.280155	0.330895	-0.646455	0.00385096	0.00512989	-1.51712	0.00188777	0.00267381	chrXV	832332	832521	190	+	sn/snoRNA	sn/snoRNA	sn/snoRNA	NA	NA	NA
snR80	-1.24079	0.00606353	0.00755491	-2.49471	2.54018e-07	3.28181e-07	-3.16873	6.62287e-08	8.29652e-08	-2.46642	0.00081331	0.00100192	-0.707881	0.0528018	0.0762665	0.617131	0.0732669	0.0938396	-0.579723	0.154068	0.1851	0.149127	0.845395	0.863264	chrV	52150	52320	171	-	sn/snoRNA	sn/snoRNA	sn/snoRNA	NA	NA	NA
snR81	-2.541	2.55734e-11	3.8374e-11	-1.75868	1.90462e-05	2.40985e-05	-2.53842	4.54866e-15	6.04355e-15	-4.06187	6.79452e-12	9.06788e-12	-0.709209	0.223005	0.275345	0.564975	0.330856	0.385283	-1.18054	4.04907e-05	5.91481e-05	-1.68576	0.0400592	0.0517974	chrXV	234346	234546	201	+	sn/snoRNA	sn/snoRNA	sn/snoRNA	NA	NA	NA
snR82	-2.52642	6.39495e-25	1.86571e-24	-2.191	4.03684e-18	5.89246e-18	-1.79343	2.05712e-14	2.71757e-14	-4.06539	3.08094e-34	5.85362e-34	-0.331568	0.479019	0.537176	0.421482	0.36796	0.423663	-0.701957	2.37608e-05	3.49601e-05	-0.761577	0.00108937	0.0015646	chrVII	316788	317055	268	+	sn/snoRNA	sn/snoRNA	sn/snoRNA	NA	NA	NA
snR83	-3.33762	1.04734e-45	1.00191e-44	-2.62777	1.27219e-28	2.21134e-28	-2.29214	6.58772e-27	1.17918e-26	-4.52616	1.90927e-58	2.94516e-57	-0.299806	0.293795	0.351281	0.218785	0.443176	0.500918	-0.572466	0.000366856	0.000513236	-0.840344	9.59011e-05	0.000145899	chrXIII	626349	626654	306	+	sn/snoRNA	sn/snoRNA	sn/snoRNA	NA	NA	NA
snR84	-1.61677	1.98579e-13	3.22151e-13	-1.81641	2.76175e-16	3.9268e-16	-1.89694	2.005e-22	3.03557e-22	-2.92439	1.20689e-25	1.86469e-25	0.0920064	0.485201	0.542591	-0.22439	0.0878008	0.111407	-0.0842863	0.529958	0.590372	-0.229292	0.182019	0.218504	chrIV	1492477	1493026	550	-	sn/snoRNA	sn/snoRNA	sn/snoRNA	NA	NA	NA
snR85	-2.62931	1.02268e-06	1.36762e-06	-2.54188	8.34853e-06	1.06081e-05	-3.38487	2.8929e-08	3.63482e-08	-4.40665	3.44578e-05	4.3239e-05	-0.686204	0.250613	0.305357	0.528269	0.374849	0.430987	-0.969754	0.0492054	0.061784	-0.475075	0.69385	0.737258	chrXIII	67768	67938	171	-	sn/snoRNA	sn/snoRNA	sn/snoRNA	NA	NA	NA
snR86	-1.82422	3.80629e-19	8.11542e-19	-2.66825	6.08603e-39	1.35797e-38	-2.22522	9.48523e-31	2.122e-30	-3.71264	8.61158e-51	5.33064e-50	0.00918609	0.946298	0.954874	-0.283799	0.037333	0.049124	-0.133344	0.316365	0.366004	-0.142935	0.451955	0.507953	chrXIII	762110	763113	1004	-	sn/snoRNA	sn/snoRNA	sn/snoRNA	NA	NA	NA
snR87	-3.33434	3.64025e-14	6.10776e-14	-2.78894	1.20069e-09	1.58711e-09	-3.17532	2.0279e-16	2.73445e-16	-3.81582	2.1865e-09	2.85644e-09	-1.00389	0.0175417	0.0287407	-0.605223	0.13183	0.163718	-2.6177	0.000172553	0.000244712	-0.0328874	0.950758	0.95633	chrXI	431030	431138	109	-	sn/snoRNA	sn/snoRNA	sn/snoRNA	NA	NA	NA
snR9	-3.16524	1.88308e-36	1.07098e-35	-2.49214	4.60916e-22	7.12513e-22	-2.0107	5.37119e-20	7.65502e-20	-4.10929	3.0969e-35	6.09703e-35	-0.593831	0.260942	0.316531	0.21429	0.684851	0.730292	-0.357275	0.0510956	0.0640587	-0.921507	0.00071813	0.0010429	chrXV	407948	408134	187	-	sn/snoRNA	sn/snoRNA	sn/snoRNA	NA	NA	NA
YAL001C	-2.26603	1.76385e-52	2.34008e-51	-3.9005	5.36281e-138	6.10119e-136	-2.97898	7.50977e-41	4.56646e-40	-4.94594	1.56379e-72	1.21167e-70	-0.857769	1.95074e-06	1.02444e-05	-1.68216	2.73726e-21	3.81757e-20	-1.91099	1.28779e-34	1.89477e-33	-1.91693	2.38044e-18	8.56329e-18	chrI	147594	151166	3573	-	NA	NA	TFIID-dominated	NA	NA	TFIID
YAL002W	-1.32681	1.10971e-17	2.20432e-17	-2.82621	2.76505e-71	1.99994e-70	-2.38071	1.93082e-30	4.23341e-30	-3.71822	5.81517e-43	1.73298e-42	-0.502596	0.00777288	0.0139642	-1.21449	7.14288e-11	2.18658e-10	-1.99704	7.00624e-28	4.75199e-27	-2.23151	2.49352e-18	8.9454e-18	chrI	143707	147531	3825	+	TATA-less	2_mis	TFIID-dominated	TAF1-enriched	NA	TFIID
YAL003W	-3.68454	9.23661e-136	4.87338e-133	-3.03296	1.40659e-92	2.79646e-91	-3.06634	3.64313e-59	2.74545e-57	-4.28713	9.62914e-65	3.06179e-63	-0.550096	4.05066e-07	2.62464e-06	-0.329358	0.00233906	0.00339091	-0.325587	0.0433923	0.0546744	-0.425533	0.0141746	0.0190024	chrI	142174	143160	987	+	TATA-less	1_mis	TFIID-dominated	TAF1-depleted	NA	CR
YAL005C	-3.07147	4.94045e-88	3.02559e-86	-3.32918	3.65305e-103	1.1819e-101	-2.63799	3.66866e-44	3.36144e-43	-4.09598	3.50897e-61	7.48543e-60	-0.929464	6.81491e-14	1.79728e-12	-1.56281	1.53675e-36	1.24097e-34	-1.58359	6.11006e-26	3.29954e-25	-1.88501	7.51642e-28	6.90452e-27	chrI	139503	141431	1929	-	TATA-containing	0_mis	TFIID-dominated	TAF1-depleted	NA	CR
YAL007C	-2.10854	6.31894e-34	3.11139e-33	-2.70599	2.66632e-52	9.15331e-52	-2.61044	6.52143e-37	2.5239e-36	-4.05049	8.37045e-46	3.13648e-45	-0.483857	0.000955311	0.00224474	-1.0554	2.38718e-13	1.00157e-12	-0.921116	1.59368e-07	2.5642e-07	-0.942539	1.11142e-06	1.87062e-06	chrI	137698	138345	648	-	TATA-less	2_mis	TFIID-dominated	TAF1-enriched	NA	TFIID
YAL008W	-2.59152	7.3635e-18	1.4742e-17	-5.22869	2.16297e-42	5.35009e-42	-3.12558	5.64669e-32	1.39802e-31	-4.0319	4.3228e-23	6.44405e-23	-1.50094	5.22231e-07	3.25407e-06	-1.84931	1.91641e-10	5.54656e-10	-1.80437	2.28885e-12	4.55534e-12	-1.82141	3.53647e-07	6.0809e-07	chrI	136914	137510	597	+	TATA-less	1_mis	TFIID-dominated	TAF1-enriched	NA	TFIID
YAL009W	-1.74071	1.6835e-15	2.99925e-15	-3.57697	2.3745e-49	7.36287e-49	-2.58819	2.87371e-32	7.29521e-32	-4.00485	1.27615e-27	2.04189e-27	-0.886629	0.00494479	0.00943306	-1.47343	2.03709e-06	3.81139e-06	-2.18851	1.94447e-13	4.08709e-13	-2.15196	1.36727e-07	2.40424e-07	chrI	135854	136633	780	+	NA	NA	TFIID-dominated	NA	NA	TFIID
YAL010C	-1.89529	1.35652e-21	3.27503e-21	-3.06692	1.46533e-49	4.59355e-49	-2.90592	3.93608e-41	2.46953e-40	-4.42556	1.98317e-45	7.21067e-45	-0.902771	0.00259292	0.00535782	-2.41195	2.10298e-15	1.16771e-14	-2.75389	1.27567e-23	5.52845e-23	-3.71424	2.66125e-09	5.12905e-09	chrI	134184	135665	1482	-	TATA-less	2_mis	TFIID-dominated	TAF1-enriched	NA	TFIID
YAL011W	-1.55961	1.43306e-16	2.68488e-16	-2.95195	1.79553e-48	5.38032e-48	-2.45096	5.98555e-27	1.07282e-26	-3.70225	9.51046e-34	1.7759e-33	-0.584231	0.0304867	0.046908	-1.51835	5.40408e-08	1.18538e-07	-2.34115	1.08015e-20	3.69906e-20	-2.36801	4.05181e-09	7.72462e-09	chrI	132199	134076	1878	+	TATA-less	1_mis	TFIID-dominated	TAF1-enriched	NA	TFIID
YAL012W	-2.01253	2.24645e-32	1.0038e-31	-2.87224	3.69104e-64	1.99817e-63	-2.48844	1.52453e-40	8.91461e-40	-4.11916	1.34974e-44	4.54476e-44	-0.269082	0.0115284	0.0197551	-1.13312	4.48547e-27	1.31567e-25	-0.970817	1.02686e-07	1.67202e-07	-1.58796	6.02822e-18	2.08242e-17	chrI	130799	131983	1185	+	TATA-less	1_mis	TFIID-dominated	TAF1-depleted	NA	CR
YAL013W	-1.23868	5.1201e-08	7.0463e-08	-2.1937	6.18242e-21	9.39208e-21	-2.36754	1.59019e-30	3.5026e-30	-3.73713	1.3649e-29	2.27573e-29	-0.862787	0.00100631	0.00235144	-1.58914	1.72788e-09	4.46193e-09	-1.77608	1.52563e-11	2.91273e-11	-2.65636	1.89139e-09	3.68228e-09	chrI	129270	130487	1218	+	TATA-less	1_mis	TFIID-dominated	TAF1-enriched	NA	TFIID
YAL014C	-1.36283	2.09519e-14	3.54663e-14	-2.30953	2.0379e-36	4.24089e-36	-2.09738	3.97514e-26	6.86791e-26	-3.71091	1.46289e-36	3.03239e-36	-0.572628	0.00883583	0.0156081	-1.39607	6.35421e-11	1.95774e-10	-1.83836	1.17228e-17	3.1771e-17	-2.40112	1.8024e-18	6.53434e-18	chrI	128252	129019	768	-	TATA-less	1_mis	TFIID-dominated	TAF1-enriched	NA	TFIID
YAL015C	-2.04009	3.09223e-20	6.98835e-20	-3.8492	4.79213e-58	2.05819e-57	-2.93929	2.11011e-50	4.3952e-49	-4.15629	1.19395e-39	2.88062e-39	-0.905219	0.000897456	0.00212792	-2.12132	1.68078e-15	9.42878e-15	-2.31204	1.08987e-33	1.4351e-32	-2.87745	9.17528e-24	5.34774e-23	chrI	126903	128102	1200	-	NA	NA	TFIID-dominated	NA	NA	TFIID
YAL016W	-1.46849	8.63765e-29	3.18868e-28	-2.33916	1.25407e-69	8.55887e-69	-2.30346	2.47258e-33	6.83579e-33	-3.70524	4.02822e-45	1.41872e-44	-0.0713906	0.599451	0.650631	-0.744231	2.75862e-08	6.25447e-08	-1.19282	1.87896e-13	3.95321e-13	-1.44089	5.854e-13	1.40264e-12	chrI	124879	126786	1908	+	TATA-less	3_mis	TFIID-dominated	TAF1-enriched	NA	TFIID
YAL017W	-1.58297	1.61674e-30	6.5539e-30	-3.29677	1.88568e-123	1.26803e-121	-2.49394	1.19297e-34	3.67887e-34	-4.0357	6.78771e-54	5.89639e-53	0.278934	0.0462816	0.0680751	-0.956874	3.43234e-12	1.23833e-11	-1.1436	1.97703e-15	4.62372e-15	-1.37204	5.38407e-12	1.21421e-11	chrI	120225	124295	4071	+	NA	NA	TFIID-dominated	NA	NA	TFIID
YAL019W	-1.44285	8.69871e-23	2.26173e-22	-1.76841	6.12575e-33	1.17332e-32	-2.42518	1.42943e-29	2.95991e-29	-3.725	5.27917e-44	1.69461e-43	-0.129665	0.348296	0.40769	-0.381924	0.00556759	0.00784017	-1.22571	9.82432e-14	2.10503e-13	-1.04568	7.55834e-07	1.28307e-06	chrI	114919	118314	3396	+	TATA-less	2_mis	TFIID-dominated	TAF1-enriched	NA	TFIID
YAL020C	-1.81658	9.30617e-07	1.24597e-06	-3.59251	2.12604e-20	3.20566e-20	-2.75001	2.81778e-38	1.26838e-37	-3.89053	1.37329e-29	2.28916e-29	-0.901225	0.00548172	0.0103166	-1.67018	1.19691e-07	2.53364e-07	-2.41106	2.23259e-29	1.81901e-28	-2.54709	4.29864e-19	1.62999e-18	chrI	113614	114615	1002	-	TATA-less	1_mis	SAGA-dominated	TAF1-depleted	NA	NA
YAL021C	-1.85351	4.02363e-28	1.41601e-27	-2.41245	7.25223e-46	1.98179e-45	-2.74865	1.8456e-44	1.76081e-43	-4.08943	8.33306e-54	7.15581e-53	-0.696961	1.33999e-06	7.3583e-06	-1.26039	1.57608e-18	1.41222e-17	-2.03337	2.12822e-30	1.94011e-29	-2.05562	2.10948e-20	8.96871e-20	chrI	110846	113359	2514	-	TATA-less	2_mis	nocall	TAF1-enriched	NA	TFIID
YAL022C	-1.95252	1.10455e-28	4.04815e-28	-2.40081	9.47727e-41	2.23537e-40	-2.61187	1.70834e-42	1.24542e-41	-4.2663	4.2626e-52	3.03744e-51	-0.816426	6.74436e-05	0.000226938	-1.35381	2.17847e-11	7.09278e-11	-1.90822	3.26308e-28	2.29189e-27	-2.31708	9.45355e-21	4.14913e-20	chrI	108877	110430	1554	-	TATA-less	1_mis	TFIID-dominated	TAF1-enriched	NA	TFIID
YAL023C	-2.63343	5.64615e-66	1.33082e-64	-2.65033	6.59675e-66	3.8541e-65	-2.68903	4.95619e-41	3.07504e-40	-4.20384	3.81957e-51	2.4545e-50	-0.952791	4.56301e-15	1.58598e-13	-1.06094	1.4214e-18	1.28594e-17	-0.884946	8.90114e-07	1.38599e-06	-1.27867	1.25828e-11	2.78658e-11	chrI	106272	108551	2280	-	TATA-less	2_mis	TFIID-dominated	TAF1-enriched	NA	TFIID
YAL024C	-1.88797	7.79726e-30	3.05783e-29	-2.47374	5.30311e-49	1.62239e-48	-2.649	1.94146e-32	5.00245e-32	-4.36429	5.56712e-56	6.20297e-55	-0.92498	8.7996e-07	5.13211e-06	-1.37729	1.44651e-13	6.2577e-13	-2.3798	1.40669e-33	1.82646e-32	-2.54431	1.50383e-19	5.94424e-19	chrI	101565	105872	4308	-	TATA-less	2_mis	TFIID-dominated	TAF1-enriched	NA	TFIID
YAL025C	-1.20851	0.00651906	0.00811511	-2.32958	2.05966e-07	2.663e-07	-2.19682	2.61297e-23	4.06333e-23	-3.30023	5.11502e-35	1.00059e-34	-0.98011	2.36355e-06	1.22623e-05	-0.312566	0.138704	0.171765	-1.60623	5.93929e-18	1.64244e-17	-1.97614	2.96803e-14	7.77352e-14	chrI	100225	101145	921	-	TATA-less	2_mis	TFIID-dominated	TAF1-enriched	NA	TFIID
YAL026C	-1.8853	2.23845e-39	1.4942e-38	-2.89952	1.89668e-88	3.00446e-87	-2.64172	2.44973e-35	8.04621e-35	-4.08673	1.33921e-47	5.8469e-47	-0.915729	4.46513e-09	4.8905e-08	-1.45858	4.85983e-21	6.51397e-20	-1.63343	1.27052e-23	5.50981e-23	-2.00342	2.4157e-21	1.12377e-20	chrI	95630	99697	4068	-	TATA-less	2_mis	nocall	TAF1-enriched	NA	TFIID
YAL027W	-1.74156	7.1256e-11	1.05492e-10	-3.4097	9.05323e-30	1.61247e-29	-2.74197	1.71212e-31	4.0591e-31	-4.59008	1.5859e-30	2.70921e-30	-1.05778	0.00545359	0.0102733	-2.14108	2.99579e-08	6.75473e-08	-2.86722	6.56646e-24	2.92151e-23	-3.28109	2.969e-14	7.77352e-14	chrI	94687	95472	786	+	TATA-containing	0_mis	TFIID-dominated	TAF1-enriched	NA	TFIID
YAL028W	-1.24986	8.97729e-07	1.20264e-06	-2.04242	2.96745e-14	4.1177e-14	-2.16946	4.87718e-11	6.25095e-11	-4.01064	3.16413e-09	4.12801e-09	-0.710549	0.0934943	0.126903	-1.58763	0.00016315	0.000257582	-2.24307	9.13857e-05	0.000131607	-0.954879	0.306839	0.358703	chrI	92900	94486	1587	+	TATA-less	2_mis	TFIID-dominated	TAF1-enriched	NA	TFIID
YAL029C	-1.64056	7.70202e-36	4.18938e-35	-2.40175	1.40093e-73	1.10958e-72	-2.41859	4.58671e-30	9.83473e-30	-3.7643	4.24911e-44	1.37509e-43	-0.251483	0.0514809	0.0746832	-0.444445	0.000506608	0.00077135	-0.932945	1.8479e-10	3.36913e-10	-0.629782	0.000909529	0.00131354	chrI	87855	92270	4416	-	TATA-less	2_mis	TFIID-dominated	TAF1-enriched	NA	TFIID
YAL030W	-1.77158	8.50206e-14	1.40013e-13	-2.72671	1.09725e-27	1.86289e-27	-2.67107	9.27749e-22	1.38153e-21	-3.90451	1.37315e-13	1.85091e-13	-0.476848	0.0319508	0.0489353	-0.844376	9.96783e-05	0.000160156	-1.0573	0.00519842	0.00688966	-2.00697	0.00124798	0.0017865	chrI	87286	87752	467	+	NA	NA	TFIID-dominated	NA	NA	TFIID
YAL031C	-1.69074	4.26499e-24	1.19159e-23	-2.90272	1.07533e-64	5.94334e-64	-2.77547	5.00231e-41	3.10079e-40	-4.2858	5.54259e-39	1.28703e-38	-1.01518	3.11038e-06	1.55856e-05	-1.73452	3.36544e-16	2.1126e-15	-2.44228	3.57748e-30	3.15962e-29	-2.77478	1.50763e-26	1.20352e-25	chrI	84749	87031	2283	-	TATA-less	1_mis	SAGA-dominated	TAF1-depleted	NA	TFIID
YAL032C	-1.48745	4.18382e-14	7.00778e-14	-2.06499	2.71559e-24	4.33572e-24	-2.37524	3.02329e-30	6.54948e-30	-3.73915	5.25215e-36	1.06705e-35	-0.738502	0.00216443	0.00458104	-1.65049	1.24989e-11	4.20119e-11	-2.05333	2.18688e-17	5.78494e-17	-2.03756	7.55602e-10	1.50889e-09	chrI	83335	84474	1140	-	TATA-less	2_mis	TFIID-dominated	TAF1-enriched	NA	TFIID
YAL033W	-2.08574	3.10658e-15	5.46921e-15	-2.61145	1.07535e-20	1.62822e-20	-2.6859	1.87809e-32	4.84662e-32	-4.5531	2.39269e-23	3.57472e-23	-0.834356	0.00458859	0.00884333	-1.63541	3.40254e-08	7.63238e-08	-1.86171	3.11815e-17	8.18201e-17	-2.4467	8.46581e-13	2.01071e-12	chrI	82706	83227	522	+	NA	NA	TFIID-dominated	NA	NA	TFIID
YAL034C	-2.11301	1.06855e-25	3.30441e-25	-3.28422	1.10262e-52	3.85862e-52	-3.33495	3.01088e-31	6.99238e-31	-5.10336	2.88577e-21	4.19878e-21	-0.792445	0.00880756	0.0155719	-1.59823	7.38992e-08	1.59899e-07	-3.16497	3.61973e-06	5.51893e-06	-2.36985	0.0120631	0.0162552	chrI	80710	81951	1242	-	NA	NA	nocall	NA	NA	TFIID
YAL034W-A	-2.18641	5.40266e-12	8.30193e-12	-3.98883	3.79749e-28	6.51229e-28	-3.27118	5.24074e-39	2.55448e-38	-4.86864	6.37096e-25	9.72964e-25	-1.11374	0.00808423	0.0144459	-1.58109	0.000175494	0.00027647	-3.27442	2.40446e-19	7.41357e-19	-2.59488	6.99154e-07	1.1884e-06	chrI	79718	80587	870	+	TATA-less	1_mis	TFIID-dominated	TAF1-enriched	NA	TFIID
YAL035W	-1.60079	4.84953e-28	1.70404e-27	-2.33784	1.60442e-57	6.75549e-57	-2.19504	1.24288e-27	2.31385e-27	-2.97963	4.05395e-33	7.44014e-33	-0.114641	0.306587	0.364568	-0.308134	0.00571888	0.00804629	-0.414428	0.00474004	0.00629238	-0.320821	0.0831825	0.10415	chrI	76427	79435	3009	+	TATA-less	2_mis	TFIID-dominated	TAF1-enriched	NA	TFIID
YAL036C	-1.39713	1.71793e-11	2.59372e-11	-1.97928	4.31332e-21	6.56717e-21	-1.95733	6.27647e-21	9.15136e-21	-3.12874	3.73103e-35	7.33262e-35	-0.408707	0.00929071	0.016311	-0.360588	0.0202534	0.0272139	-1.18934	3.94672e-12	7.76712e-12	-1.18002	1.61793e-08	2.97578e-08	chrI	75043	76152	1110	-	TATA-less	1_mis	TFIID-dominated	TAF1-enriched	NA	TFIID
YAL038W	-3.34543	3.45175e-100	3.88124e-98	-2.95368	2.09904e-78	2.03352e-77	-3.09988	6.98733e-56	2.94742e-54	-4.19644	1.15977e-73	1.00231e-71	-0.187066	0.0782221	0.108425	-0.266675	0.0120251	0.0164794	-0.640736	0.000268152	0.000377253	-0.166013	0.30418	0.355913	chrI	71786	73288	1503	+	TATA-less	1_mis	SAGA-dominated	TAF1-depleted	NA	CR
YAL039C	-1.97333	7.92736e-17	1.50536e-16	-2.88155	1.07835e-32	2.05227e-32	-3.03064	3.874e-48	6.04254e-47	-4.41114	1.7132e-46	6.87421e-46	-1.28908	7.41885e-08	5.77844e-07	-2.02669	2.67065e-18	2.27946e-17	-2.69276	1.11134e-34	1.6576e-33	-3.61269	4.03357e-31	5.32571e-30	chrI	68716	69525	810	-	TATA-less	1_mis	TFIID-dominated	TAF1-enriched	NA	TFIID
YAL040C	-1.56011	3.18193e-18	6.47045e-18	-2.90443	1.35852e-56	5.46515e-56	-3.12185	1.17575e-37	4.94094e-37	-4.10135	9.17568e-23	1.36181e-22	-0.804819	8.73317e-05	0.000285085	-1.86371	4.50986e-19	4.38321e-18	-3.00564	0.000213898	0.000302099	-0.632954	0.5833	0.634787	chrI	65778	67520	1743	-	TATA-containing	0_mis	SAGA-dominated	TAF1-depleted	NA	CR
YAL041W	-1.26697	2.05451e-19	4.44399e-19	-2.45926	4.88179e-67	2.97637e-66	-2.64801	7.08006e-37	2.72438e-36	-4.06032	7.9922e-50	4.4269e-49	-0.616858	0.000196724	0.00057228	-1.52806	6.76775e-21	8.92498e-20	-2.37731	1.47708e-26	8.61145e-26	-2.88922	1.58275e-21	7.55686e-21	chrI	62840	65404	2565	+	TATA-less	2_mis	TFIID-dominated	TAF1-enriched	NA	TFIID
YAL042W	-1.97936	2.35522e-30	9.4859e-30	-2.59953	6.40725e-50	2.03837e-49	-2.58377	3.98346e-43	3.15805e-42	-3.98416	6.7993e-54	5.89885e-53	-0.56634	1.94431e-05	7.62633e-05	-1.01524	7.63641e-15	3.94236e-14	-1.05435	1.2652e-11	2.42903e-11	-1.17608	7.63287e-10	1.52377e-09	chrI	61316	62563	1248	+	TATA-less	1_mis	TFIID-dominated	TAF1-enriched	NA	TFIID
YAL043C	-1.16617	7.0897e-12	1.08642e-11	-1.83199	8.57548e-27	1.43147e-26	-2.2193	3.80278e-29	7.71251e-29	-3.63281	1.45419e-39	3.49224e-39	-0.382243	0.0126635	0.0214858	-1.14968	1.83181e-14	8.98866e-14	-1.77737	3.1653e-17	8.29904e-17	-2.53536	3.64973e-23	2.01213e-22	chrI	58695	61052	2358	-	TATA-less	1_mis	TFIID-dominated	TAF1-enriched	NA	TFIID
YAL044C	-3.68079	1.50355e-91	1.10891e-89	-2.4625	5.03438e-43	1.27185e-42	-2.79782	3.87188e-35	1.2497e-34	-3.87498	9.11393e-34	1.70374e-33	-0.997618	9.15137e-13	2.04562e-11	-0.847343	1.86661e-10	5.41681e-10	-0.682966	6.67217e-06	1.00576e-05	-0.646924	0.000552329	0.000807326	chrI	57950	58462	513	-	TATA-containing	0_mis	SAGA-dominated	TAF1-depleted	NA	TFIID
YAL044W-A	-2.31675	1.05321e-17	2.0939e-17	-2.62869	2.19398e-19	3.26645e-19	-2.71407	2.48526e-19	3.50623e-19	-3.6544	8.55904e-11	1.13197e-10	-0.180861	0.43874	0.498138	-0.34682	0.136151	0.168763	-0.332019	0.250485	0.293697	-0.386429	0.250206	0.295677	chrI	57518	57850	333	+	NA	NA	NA	NA	NA	TFIID
YAL046C	-2.51327	1.59119e-19	3.46145e-19	-2.69516	6.88905e-19	1.01486e-18	-2.83608	8.16346e-21	1.18614e-20	-5.30165	1.44584e-17	2.01873e-17	-0.988526	0.00109454	0.00253036	-1.41039	2.13982e-06	3.99788e-06	-1.31364	3.14165e-06	4.80575e-06	-1.87478	1.1074e-07	1.95571e-07	chrI	57029	57385	357	-	TATA-containing	0_mis	TFIID-dominated	TAF1-enriched	NA	TFIID
YAL047C	-1.59159	1.01052e-13	1.66016e-13	-2.84032	1.22063e-36	2.55486e-36	-2.85571	7.25315e-36	2.50628e-35	-4.89934	1.33294e-46	5.3966e-46	-0.95401	0.00101855	0.00237202	-1.95915	1.58915e-10	4.66128e-10	-2.16432	3.99094e-16	9.74999e-16	-3.62427	1.34658e-12	3.15913e-12	chrI	54989	56857	1869	-	TATA-containing	0_mis	TFIID-dominated	TAF1-enriched	NA	TFIID
YAL048C	-1.76881	8.34505e-21	1.9403e-20	-2.85014	1.79979e-47	5.22197e-47	-2.81398	8.70928e-42	5.85889e-41	-4.38619	1.37762e-45	5.08571e-45	-0.957232	0.00101197	0.00235943	-1.62927	9.85619e-09	2.35118e-08	-2.42919	4.13615e-18	1.15955e-17	-2.72413	3.07098e-13	7.47907e-13	chrI	52801	54789	1989	-	NA	NA	TFIID-dominated	NA	NA	TFIID
YAL049C	-1.88342	3.92347e-22	9.80571e-22	-3.01387	4.07832e-48	1.21306e-47	-2.74644	2.19778e-40	1.26311e-39	-4.373	4.88491e-42	1.36749e-41	-0.395478	0.0415017	0.061724	-0.92175	1.49629e-06	2.84348e-06	-0.874505	2.78623e-07	4.43267e-07	-1.02298	1.14079e-05	1.82672e-05	chrI	51855	52595	741	-	TATA-less	1_mis	TFIID-dominated	TAF1-enriched	NA	TFIID
YAL051W	-1.71005	2.24019e-26	7.15672e-26	-3.05072	1.75497e-76	1.56126e-75	-2.96975	1.00716e-40	6.00981e-40	-4.65467	3.53269e-50	2.03537e-49	-0.694114	0.000495627	0.00127632	-1.76948	1.11435e-18	1.02086e-17	-2.54137	2.19433e-30	1.98648e-29	-3.33439	4.3003e-31	5.64318e-30	chrI	48564	51707	3144	+	TATA-less	2_mis	TFIID-dominated	TAF1-enriched	NA	TFIID
YAL053W	-2.00528	1.54331e-35	8.23781e-35	-2.2376	1.0368e-42	2.59067e-42	-2.82378	5.11199e-42	3.50932e-41	-4.2653	3.06168e-44	9.99942e-44	-0.855066	5.29485e-07	3.29245e-06	-1.23904	2.73646e-13	1.13862e-12	-2.04353	2.25495e-24	1.04909e-23	-2.60858	9.21865e-24	5.36822e-23	chrI	45899	48250	2352	+	TATA-less	2_mis	SAGA-dominated	TAF1-depleted	NA	TFIID
YAL054C	-2.55359	1.79244e-13	2.91611e-13	-3.56102	1.13537e-20	1.71757e-20	-3.16218	1.28217e-20	1.85534e-20	-5.13646	1.28255e-12	1.71916e-12	-0.850435	0.0672399	0.0948869	-1.74041	0.000226069	0.000353591	-1.61494	0.00229668	0.00309293	-2.68939	0.00102268	0.00147174	chrI	42881	45022	2142	-	NA	NA	nocall	NA	NA	NA
YAL055W	-1.94326	8.27161e-10	1.18842e-09	-3.88489	4.85238e-27	8.13355e-27	-2.51281	2.97265e-17	4.05896e-17	-4.55942	2.19745e-19	3.12444e-19	-1.21851	0.00615293	0.0113894	-1.57475	0.000363505	0.000560114	-2.0859	2.36192e-07	3.77015e-07	-3.25455	3.12695e-05	4.88361e-05	chrI	42177	42719	543	+	NA	NA	TFIID-dominated	NA	NA	NA
YAL056W	-1.34727	3.19693e-20	7.21783e-20	-2.41104	2.15608e-59	9.7357e-59	-2.31292	2.31084e-27	4.24044e-27	-3.73802	2.54807e-48	1.20284e-47	-0.582849	0.000553671	0.00140005	-1.27004	1.46901e-14	7.30706e-14	-1.92104	6.70004e-33	8.013e-32	-2.42569	3.06359e-29	3.22968e-28	chrI	39259	41901	2643	+	TATA-less	2_mis	TFIID-dominated	TAF1-enriched	NA	TFIID
YAL058W	-2.38753	2.4713e-29	9.41702e-29	-2.96392	9.36258e-40	2.13136e-39	-2.89476	1.43031e-42	1.05651e-41	-4.15816	9.16653e-33	1.66196e-32	-1.2081	3.71099e-06	1.81564e-05	-1.21077	2.2735e-06	4.23072e-06	-1.45818	2.58567e-13	5.40693e-13	-1.51096	1.32926e-09	2.61679e-09	chrI	37464	38972	1509	+	TATA-less	2_mis	TFIID-dominated	TAF1-enriched	NA	TFIID
YAL059W	-1.96185	3.2423e-25	9.62309e-25	-1.70706	1.62617e-18	2.38484e-18	-2.44649	4.55223e-31	1.04267e-30	-4.07909	9.86311e-44	3.09099e-43	-0.669461	0.00173966	0.00379143	-0.987098	7.02005e-06	1.24558e-05	-1.91301	1.41468e-25	7.39444e-25	-2.67861	4.19707e-27	3.5094e-26	chrI	36509	37147	639	+	NA	NA	TFIID-dominated	NA	NA	TFIID
YAL060W	-3.11666	9.5251e-66	2.2222e-64	-3.69852	2.05566e-85	2.80313e-84	-2.67076	5.85613e-39	2.83999e-38	-4.96402	3.32028e-57	4.29598e-56	-1.0427	8.57162e-08	6.58252e-07	-1.53343	4.18907e-17	2.99134e-16	-1.59014	3.04928e-22	1.18234e-21	-2.02681	2.73046e-20	1.14669e-19	chrI	35155	36303	1149	+	TATA-containing	0_mis	SAGA-dominated	TAF1-depleted	NA	CR
YAL062W	-2.86851	4.21528e-12	6.51185e-12	-4.34654	4.82904e-18	7.04133e-18	-3.02286	1.78379e-27	3.29584e-27	-4.99283	4.81326e-14	6.51398e-14	-0.801659	0.0575565	0.0824214	-1.26484	0.00273334	0.00394153	-1.29753	5.80693e-06	8.77773e-06	-0.924545	0.03385	0.0440395	chrI	31567	32940	1374	+	NA	NA	SAGA-dominated	NA	NA	NA
YAL063C	-0.776664	0.12041	0.142616	-2.23748	1.07733e-05	1.36689e-05	-1.26172	0.0380948	0.0439384	-3.96644	1.02538e-07	1.32365e-07	0.212759	0.716247	0.756906	-0.383584	0.511227	0.568117	-0.94181	0.311947	0.361213	-0.743811	0.436518	0.492811	chrI	24000	27968	3969	-	NA	NA	TFIID-dominated	NA	NA	NA
YAL067C	-1.04525	0.133285	0.157459	-3.45229	1.21821e-05	1.54449e-05	-1.56784	2.38107e-07	2.96341e-07	-3.69069	2.6833e-05	3.37653e-05	0.54298	0.36149	0.420879	-0.802172	0.179452	0.218828	-1.0235	0.0385721	0.0487991	-1.75845	0.0854888	0.106914	chrI	7235	9016	1782	-	NA	NA	TFIID-dominated	NA	NA	NA
YAR002C-A	-2.37586	1.57888e-39	1.06695e-38	-2.93884	2.36658e-56	9.40461e-56	-2.59535	2.24278e-36	8.23539e-36	-3.77806	8.81387e-40	2.14415e-39	-0.554577	0.000220268	0.000632509	-0.793703	8.21971e-08	1.77209e-07	-0.517578	0.000627944	0.000869173	-0.54529	0.00371099	0.00516607	chrI	154065	154724	660	-	TATA-less	1_mis	nocall	TAF1-enriched	NA	TFIID
YAR002W	-1.82534	2.57448e-35	1.36148e-34	-2.29098	2.49601e-53	8.94001e-53	-2.4025	8.22557e-29	1.63318e-28	-3.91592	7.12193e-48	3.20273e-47	-0.85395	1.40063e-07	1.02582e-06	-1.48401	1.3973e-20	1.75091e-19	-1.89977	9.51799e-25	4.62627e-24	-3.01265	6.64361e-36	1.58137e-34	chrI	152257	153876	1620	+	TATA-less	1_mis	TFIID-dominated	TAF1-enriched	NA	TFIID
YAR003W	-1.50698	0.00045107	0.000576358	-3.75634	6.1306e-18	8.92398e-18	-2.54944	4.79054e-35	1.53733e-34	-3.89226	8.97458e-42	2.47131e-41	-0.819685	0.000876483	0.0020889	-1.81423	2.4794e-13	1.03694e-12	-2.2466	4.86402e-35	7.71379e-34	-2.53342	5.15741e-23	2.78449e-22	chrI	155005	156285	1281	+	TATA-containing	0_mis	TFIID-dominated	TAF1-enriched	NA	TFIID
YAR007C	-1.86551	5.39861e-38	3.32309e-37	-2.76606	6.48755e-79	6.40261e-78	-2.94318	3.29543e-48	5.17622e-47	-4.63831	1.34642e-65	4.67845e-64	-0.651703	7.18513e-05	0.000239757	-1.54175	1.72002e-21	2.48909e-20	-2.03789	2.9661e-35	4.83326e-34	-2.61659	2.95302e-30	3.50813e-29	chrI	156754	158619	1866	-	TATA-less	2_mis	TFIID-dominated	TAF1-enriched	NA	TFIID
YAR008W	-1.66422	2.70871e-09	3.83468e-09	-2.63091	2.59453e-18	3.79604e-18	-2.84567	6.8504e-31	1.54803e-30	-4.42234	7.39654e-36	1.49059e-35	-0.960949	0.0113207	0.0194546	-1.14979	0.00246352	0.00356344	-2.47144	5.16437e-25	2.56761e-24	-2.90742	1.17974e-14	3.17073e-14	chrI	158966	159793	828	+	NA	NA	TFIID-dominated	NA	NA	TFIID
YAR014C	-1.34044	2.06469e-17	4.04273e-17	-2.01546	1.31224e-36	2.7441e-36	-2.31122	8.55216e-28	1.60446e-27	-3.76245	1.59642e-46	6.42474e-46	-0.527928	0.000681089	0.00167982	-1.03823	1.13363e-11	3.82222e-11	-1.85876	2.20208e-30	1.99073e-29	-2.37404	6.06063e-31	7.87399e-30	chrI	166742	168871	2130	-	TATA-less	2_mis	TFIID-dominated	TAF1-enriched	NA	TFIID
YAR015W	-1.94324	1.97342e-27	6.68101e-27	-2.2842	1.86634e-35	3.79633e-35	-2.84905	3.09e-36	1.11543e-35	-3.89705	2.17063e-30	3.70062e-30	-0.86149	3.00736e-06	1.51324e-05	-1.01825	1.07752e-08	2.56293e-08	-1.31783	2.57803e-10	4.67027e-10	-1.55632	2.76472e-07	4.77655e-07	chrI	169375	170295	921	+	TATA-containing	0_mis	SAGA-dominated	TAF1-depleted	NA	TFIID
YAR018C	-1.4727	8.1315e-19	1.70615e-18	-2.26138	3.58604e-40	8.26501e-40	-2.34968	2.4609e-25	4.09661e-25	-3.63287	9.63729e-30	1.61364e-29	-0.448866	0.0462257	0.0680096	-1.10406	6.36777e-07	1.25684e-06	-2.14979	1.09203e-14	2.45189e-14	-3.17683	9.2347e-08	1.63977e-07	chrI	170396	171703	1308	-	TATA-less	1_mis	TFIID-dominated	TAF1-enriched	NA	TFIID
YAR019C	-1.85777	1.10125e-26	3.57814e-26	-3.2416	7.77068e-70	5.34059e-69	-3.06094	1.73273e-47	2.45177e-46	-4.82498	1.31925e-49	7.08047e-49	-0.94456	0.0003067	0.000837126	-1.95258	9.31271e-14	4.16082e-13	-2.42221	2.85514e-13	5.95514e-13	-3.17638	9.03695e-08	1.60553e-07	chrI	172211	175135	2925	-	TATA-less	1_mis	TFIID-dominated	TAF1-enriched	NA	TFIID
YAR020C	-1.66191	0.00420685	0.00526258	-1.90411	0.00141414	0.0017389	-1.84653	0.00343137	0.00405751	-3.27269	3.04063e-05	3.82049e-05	-0.794544	0.175621	0.22274	-0.936816	0.113583	0.142218	-1.70564	0.0641277	0.0797528	-1.40552	0.113765	0.140075	chrI	176856	177023	168	-	NA	NA	TFIID-dominated	NA	NA	NA
YAR027W	-1.50545	4.39681e-12	6.78311e-12	-2.77771	5.07731e-35	1.02127e-34	-2.33548	1.55522e-26	2.73202e-26	-3.89376	3.8427e-37	8.21294e-37	-0.0652319	0.797253	0.824683	-1.43399	1.44371e-08	3.38956e-08	-1.16853	3.80546e-08	6.31465e-08	-1.65222	1.92859e-10	3.97292e-10	chrI	183770	184477	708	+	NA	NA	TFIID-dominated	NA	NA	TFIID
YAR031W	-2.43493	1.17152e-09	1.67475e-09	-3.31129	1.30497e-13	1.79952e-13	-2.4965	6.52238e-08	8.17369e-08	-3.0024	2.45849e-05	3.09422e-05	-1.40233	0.00271588	0.00557551	-1.32101	0.00320875	0.0045997	-2.14768	0.000127165	0.000181608	-1.48513	0.0187493	0.0248744	chrI	186836	187732	897	+	NA	NA	nocall	NA	NA	NA
YAR033W	-2.25796	1.15089e-15	2.06487e-15	-3.40822	6.76964e-28	1.15419e-27	-3.12796	1.4851e-20	2.14528e-20	-4.4803	3.98889e-25	6.11534e-25	-0.571574	0.186478	0.234969	-2.05952	1.81778e-06	3.41965e-06	-2.63495	2.73341e-09	4.74723e-09	-3.46138	2.67206e-12	6.13634e-12	chrI	188107	188811	705	+	TATA-less	2_mis	TFIID-dominated	TAF1-enriched	NA	NA
YAR035W	-2.32443	2.00535e-10	2.93215e-10	-1.30223	0.000448443	0.000556921	-1.67768	0.000139694	0.000168543	-2.9516	0.00310803	0.00379139	-0.836075	0.0478336	0.0699473	-0.678068	0.0886378	0.112448	-0.60292	0.28573	0.332332	-1.17872	0.11129	0.137209	chrI	190193	192256	2064	+	NA	NA	SAGA/TFIID-dominated	NA	NA	NA
YAR042W	-1.75874	1.20353e-33	5.7768e-33	-2.47551	6.72286e-64	3.5857e-63	-2.65855	5.88768e-36	2.05992e-35	-3.94824	9.22958e-47	3.7707e-46	-0.657499	3.72836e-06	1.82117e-05	-1.17425	4.40932e-17	3.12813e-16	-1.73786	1.40978e-23	6.08136e-23	-2.14849	2.83816e-23	1.58361e-22	chrI	192619	196185	3567	+	TATA-less	1_mis	TFIID-dominated	TAF1-enriched	NA	TFIID
YAR050W	-0.392654	0.11251	0.133536	-0.781805	0.00180215	0.00220889	-0.926715	0.00124725	0.00148505	-2.07986	3.02315e-06	3.84583e-06	-0.0312428	0.925232	0.937865	0.0404904	0.901893	0.921079	-1.33218	0.09892	0.121059	-1.17657	0.222126	0.264266	chrI	203403	208016	4614	+	NA	NA	TFIID-dominated	NA	NA	NA
YAR071W	-3.06123	1.05585e-19	2.32043e-19	-2.12344	9.578e-10	1.26776e-09	-2.84349	1.96201e-35	6.49861e-35	-4.02009	3.22594e-12	4.31127e-12	-0.962364	0.00544793	0.0102659	-0.869125	0.00918595	0.0127111	-0.648945	9.25958e-05	0.000133291	-0.564239	0.0495987	0.0635776	chrI	225460	226863	1404	+	NA	NA	TFIID-dominated	NA	NA	NA
YBL001C	-2.37449	1.32361e-30	5.39754e-30	-4.23625	5.35599e-66	3.14527e-65	-2.83513	2.10567e-36	7.74698e-36	-4.56491	2.93867e-33	5.40507e-33	-0.348463	0.0295238	0.0456059	-0.47631	0.00258278	0.00373099	-0.300469	0.0593535	0.0740981	-0.650454	0.0014984	0.00213375	chrII	237153	237467	315	-	NA	NA	TFIID-dominated	NA	NA	TFIID
YBL002W	-3.99125	3.12222e-120	7.9316e-118	-3.44045	1.08873e-89	1.84385e-88	-3.6324	2.7008e-65	4.21262e-63	-5.09802	3.38756e-63	9.09783e-62	-1.99363	1.16784e-10	1.78879e-09	-1.72147	2.32823e-08	5.31738e-08	-2.44005	1.02933e-24	4.98824e-24	-2.65315	1.75784e-21	8.34397e-21	chrII	236492	236887	396	+	TATA-containing	0_mis	TFIID-dominated	TAF1-depleted	NA	CR
YBL003C	-3.24655	2.34606e-82	1.06567e-80	-3.00482	4.88156e-70	3.37187e-69	-2.65824	5.8643e-41	3.60512e-40	-4.99373	9.88225e-80	1.9593e-77	-1.93452	9.12678e-37	1.82931e-33	-1.70249	9.0082e-30	3.54956e-28	-2.08421	5.07225e-42	1.95627e-40	-3.08482	2.17032e-54	2.2468e-52	chrII	235394	235792	399	-	TATA-containing	0_mis	TFIID-dominated	TAF1-depleted	NA	CR
YBL004W	-1.55561	4.76032e-27	1.57811e-26	-1.47771	1.89633e-24	3.03829e-24	-1.98759	6.29503e-20	8.96216e-20	-3.23547	2.95429e-34	5.61773e-34	-0.183788	0.214056	0.26544	0.0455874	0.757689	0.798204	-0.456138	0.00207821	0.00280625	-0.311411	0.107618	0.132857	chrII	227636	235117	7482	+	TATA-less	2_mis	TFIID-dominated	TAF1-enriched	NA	TFIID
YBL005W	-1.63312	1.79996e-20	4.11805e-20	-2.85137	8.00054e-56	3.11794e-55	-2.73278	8.86216e-41	5.32126e-40	-4.23649	1.22266e-42	3.56485e-42	-0.750559	0.000632892	0.00156931	-1.91439	1.23882e-17	9.61223e-17	-2.2012	6.58519e-15	1.49607e-14	-2.78546	3.05166e-11	6.62328e-11	chrII	217470	220400	2931	+	TATA-less	1_mis	TFIID-dominated	TAF1-enriched	NA	TFIID
YBL006C	-2.11144	2.58847e-28	9.25186e-28	-2.30391	2.01072e-31	3.72543e-31	-3.00337	5.96916e-43	4.62834e-42	-4.54087	3.96821e-53	3.12862e-52	-1.00597	3.44103e-06	1.70576e-05	-1.94404	3.38583e-19	3.38635e-18	-2.6603	2.5698e-39	6.97915e-38	-3.05371	1.99305e-37	5.50851e-36	chrII	216587	217129	543	-	TATA-less	2_mis	TFIID-dominated	TAF1-enriched	NA	TFIID
YBL007C	-1.93994	3.38299e-46	3.31012e-45	-2.63393	1.04021e-82	1.21547e-81	-2.26437	4.95783e-31	1.13295e-30	-3.72088	5.49407e-47	2.29038e-46	-0.280563	0.0119189	0.0203603	-0.760586	5.5663e-12	1.96064e-11	-0.978851	1.45467e-08	2.45635e-08	-1.21507	6.66612e-12	1.49506e-11	chrII	212632	216366	3735	-	TATA-containing	0_mis	TFIID-dominated	TAF1-enriched	NA	TFIID
YBL008W	-1.64576	4.1174e-24	1.15176e-23	-3.04325	1.01014e-69	6.91474e-69	-2.97135	3.29957e-46	3.88932e-45	-4.76621	5.17812e-54	4.55094e-53	-0.839052	0.000400909	0.00105917	-1.6469	1.00201e-11	3.4116e-11	-2.41453	1.72634e-38	4.19862e-37	-2.71766	7.14839e-21	3.18673e-20	chrII	209653	212175	2523	+	TATA-less	2_mis	TFIID-dominated	TAF1-enriched	NA	TFIID
YBL009W	-2.05442	3.94523e-36	2.19468e-35	-2.79512	1.82705e-60	8.54244e-60	-3.06025	1.56245e-41	1.03042e-40	-4.86445	2.16946e-50	1.28059e-49	-0.987351	1.81572e-05	7.19705e-05	-1.70325	3.95524e-13	1.61191e-12	-2.67095	2.21644e-22	8.65594e-22	-3.02221	6.07732e-12	1.36677e-11	chrII	207194	209224	2031	+	TATA-less	1_mis	TFIID-dominated	TAF1-enriched	NA	TFIID
YBL011W	-2.28683	2.41186e-54	3.49007e-53	-3.10494	5.34464e-96	1.21387e-94	-2.95619	6.94426e-52	1.72501e-50	-4.3905	7.44594e-60	1.36025e-58	-1.32937	6.03704e-17	2.74443e-15	-2.19136	8.66907e-44	1.57512e-41	-2.5549	3.54307e-44	1.83284e-42	-3.26247	3.19675e-41	1.27168e-39	chrII	203538	205817	2280	+	TATA-less	1_mis	TFIID-dominated	TAF1-enriched	NA	TFIID
YBL013W	-2.97862	1.64841e-33	7.86263e-33	-3.90347	3.72113e-45	9.97391e-45	-3.43511	3.10925e-42	2.17907e-41	-4.78134	5.39504e-33	9.85849e-33	-1.55888	0.000112289	0.00035369	-2.20232	6.82235e-08	1.48207e-07	-3.38402	1.86956e-11	3.56205e-11	-3.6105	1.29848e-07	2.28575e-07	chrII	202056	203261	1206	+	TATA-less	2_mis	nocall	TAF1-enriched	NA	TFIID
YBL014C	-1.25044	2.11198e-16	3.91864e-16	-1.60707	2.0813e-25	3.38928e-25	-2.03035	6.14672e-22	9.18994e-22	-3.38566	8.87296e-39	2.03375e-38	-0.624521	0.000207211	0.000600173	-0.704663	2.54583e-05	4.28741e-05	-1.65765	1.1906e-24	5.7314e-24	-1.88059	9.80203e-18	3.33996e-17	chrII	199064	201748	2685	-	TATA-less	2_mis	TFIID-dominated	TAF1-enriched	NA	TFIID
YBL015W	-1.45932	1.71095e-18	3.52838e-18	-2.10023	7.57531e-34	1.48243e-33	-2.51749	3.38514e-32	8.51938e-32	-4.25899	3.3369e-48	1.55239e-47	-0.392514	0.0463641	0.0681465	-1.19754	1.22089e-09	3.20333e-09	-1.51799	6.74367e-15	1.53101e-14	-2.20076	3.79328e-17	1.22961e-16	chrII	194122	195702	1581	+	TATA-containing	0_mis	TFIID-dominated	TAF1-depleted	NA	TFIID
YBL016W	-2.24249	8.68032e-36	4.71404e-35	-2.21707	3.17519e-34	6.26542e-34	-3.04817	2.38683e-46	2.87406e-45	-4.50885	3.24466e-49	1.6799e-48	-1.16052	2.04782e-09	2.39098e-08	-1.73395	2.78372e-19	2.84505e-18	-2.40152	3.72188e-26	2.08055e-25	-3.65311	1.28442e-36	3.27226e-35	chrII	192451	193512	1062	+	TATA-containing	0_mis	TFIID-dominated	TAF1-depleted	NA	TFIID
YBL017C	-1.98249	2.86075e-54	4.12224e-53	-2.96664	3.935e-116	2.07617e-114	-2.48572	6.95894e-33	1.85213e-32	-3.96823	4.43632e-51	2.84e-50	-0.761793	2.53867e-10	3.6356e-09	-1.06953	2.58228e-19	2.6516e-18	-1.13103	7.68271e-14	1.6554e-13	-1.27057	1.75558e-11	3.85e-11	chrII	186844	191583	4740	-	TATA-less	1_mis	TFIID-dominated	TAF1-enriched	NA	TFIID
YBL018C	-1.82263	2.97962e-14	5.01404e-14	-1.98222	2.66299e-15	3.73526e-15	-2.50143	2.62247e-30	5.70697e-30	-3.49777	1.17555e-20	1.69906e-20	-1.05638	0.000109924	0.000347409	-1.21764	7.52048e-06	1.33058e-05	-1.75461	2.6477e-17	6.97845e-17	-2.25903	2.26756e-13	5.5577e-13	chrII	185998	186474	477	-	TATA-less	1_mis	TFIID-dominated	TAF1-enriched	NA	TFIID
YBL019W	-2.65071	1.68606e-30	6.83088e-30	-4.5684	2.45496e-61	1.17834e-60	-3.57002	3.37356e-58	2.11462e-56	-5.33314	6.09158e-41	1.59842e-40	-1.49345	0.000129997	0.000398813	-2.54071	4.93642e-11	1.54882e-10	-3.02452	4.44124e-25	2.21654e-24	-3.3867	2.66354e-15	7.45243e-15	chrII	184353	185915	1563	+	NA	NA	TFIID-dominated	NA	NA	TFIID
YBL020W	-1.74296	2.27095e-26	7.25161e-26	-2.42761	1.66245e-46	4.65608e-46	-2.62967	7.75645e-32	1.89104e-31	-3.80206	1.74165e-39	4.16476e-39	-0.699757	0.000590708	0.00147566	-1.0441	2.9706e-07	6.05318e-07	-1.38129	3.28556e-13	6.82667e-13	-1.73528	6.21051e-14	1.58284e-13	chrII	182401	184125	1725	+	TATA-less	2_mis	TFIID-dominated	TAF1-enriched	NA	TFIID
YBL021C	-1.52038	9.77325e-09	1.36806e-08	-2.69518	9.18603e-22	1.41366e-21	-2.69915	5.74252e-26	9.8605e-26	-4.42056	8.58807e-28	1.3797e-27	-1.03973	0.00499635	0.00951934	-1.65745	7.34613e-06	1.30079e-05	-2.62567	1.85726e-14	4.12737e-14	-4.41127	1.28779e-21	6.18481e-21	chrII	181660	182094	435	-	TATA-less	1_mis	TFIID-dominated	TAF1-enriched	NA	TFIID
YBL022C	-1.71987	2.36706e-33	1.11893e-32	-3.03866	7.76034e-100	2.10388e-98	-2.91807	3.67814e-46	4.26804e-45	-4.2537	1.37901e-58	2.18215e-57	-0.455035	7.53557e-05	0.000249925	-1.56148	3.49991e-43	5.86999e-41	-1.7373	2.17563e-32	2.47051e-31	-1.76371	3.83211e-21	1.74777e-20	chrII	177874	181275	3402	-	TATA-less	3_mis	nocall	TAF1-enriched	NA	TFIID
YBL023C	-1.48555	9.35221e-27	3.04446e-26	-2.69331	7.20601e-80	7.37702e-79	-2.58218	2.05438e-36	7.56241e-36	-4.02654	5.04017e-48	2.29721e-47	-0.640384	0.000378193	0.00100623	-1.35248	8.20853e-14	3.6978e-13	-1.90881	4.35817e-30	3.81296e-29	-2.42552	1.01654e-24	6.64985e-24	chrII	174920	177526	2607	-	NA	NA	TFIID-dominated	NA	NA	TFIID
YBL024W	-1.71001	1.16908e-40	8.4491e-40	-2.0214	3.92351e-55	1.48435e-54	-2.28185	1.49811e-29	3.09831e-29	-3.41586	2.40846e-42	6.89694e-42	-0.495072	8.72657e-05	0.000285024	-0.678489	6.53064e-08	1.42105e-07	-1.18372	9.30769e-14	1.99761e-13	-1.35614	3.11533e-10	6.35538e-10	chrII	172534	174588	2055	+	TATA-less	2_mis	TFIID-dominated	TAF1-enriched	NA	TFIID
YBL025W	-1.86896	7.44827e-13	1.18231e-12	-3.21751	1.35522e-30	2.46302e-30	-2.6811	1.12795e-27	2.10261e-27	-3.66386	1.21042e-23	1.81724e-23	-1.27165	0.00294004	0.00597448	-2.23049	1.29346e-07	2.72219e-07	-2.26704	1.26071e-11	2.42114e-11	-3.33313	1.55801e-13	3.86951e-13	chrII	171481	171918	438	+	TATA-less	1_mis	TFIID-dominated	TAF1-enriched	NA	TFIID
YBL026W	-2.40373	1.19305e-25	3.67781e-25	-3.21965	6.79749e-42	1.65509e-41	-3.07563	6.28134e-47	8.11733e-46	-4.8413	3.21634e-50	1.86587e-49	-1.21628	1.20036e-08	1.17362e-07	-1.91863	1.77222e-19	1.8697e-18	-1.98611	2.85859e-25	1.44998e-24	-2.94537	7.38939e-35	1.55463e-33	chrII	170623	171038	416	+	TATA-less	1_mis	nocall	TAF1-enriched	NA	TFIID
YBL027W	-2.92302	1.45748e-58	2.56988e-57	-2.87176	8.01838e-56	3.12311e-55	-2.83181	1.68838e-38	7.78813e-38	-3.97387	3.81523e-54	3.42456e-53	-0.0449894	0.711638	0.752961	0.0516538	0.670605	0.717323	0.0409531	0.801043	0.837805	-0.0331255	0.855979	0.872842	chrII	168423	169376	954	+	TATA-less	2_mis	TFIID-dominated	TAF1-depleted	RPG	TFIID
YBL028C	-2.36011	1.08372e-26	3.52285e-26	-2.64298	3.632e-31	6.67879e-31	-3.0852	6.43623e-50	1.25488e-48	-4.66311	5.72978e-50	3.23217e-49	-1.38521	2.60605e-10	3.72214e-09	-1.8308	2.68733e-16	1.71324e-15	-2.76374	1.22086e-40	3.86289e-39	-3.03512	1.30152e-32	2.03074e-31	chrII	167518	167838	321	-	TATA-less	1_mis	TFIID-dominated	TAF1-enriched	NA	TFIID
YBL029C-A	-2.77919	6.49605e-25	1.8928e-24	-2.51691	3.78468e-18	5.52674e-18	-2.85259	5.85616e-27	1.04991e-26	-4.79481	7.31685e-21	1.06048e-20	-1.3533	3.3503e-05	0.000123516	-1.36414	2.75215e-05	4.62178e-05	-2.28125	3.13062e-12	6.19095e-12	-3.12837	5.85059e-12	1.31805e-11	chrII	164488	164772	285	-	TATA-less	1_mis	NA	TAF1-depleted	NA	TFIID
YBL030C	-1.98442	5.50347e-40	3.81296e-39	-1.79393	1.80675e-32	3.41956e-32	-2.05629	2.59432e-20	3.72673e-20	-3.53389	5.90679e-32	1.04481e-31	-0.553554	5.0534e-06	2.38524e-05	-0.700006	7.44768e-09	1.80561e-08	-1.15633	0.00919176	0.0120233	-0.874987	0.000576954	0.000842377	chrII	163041	163997	957	-	TATA-containing	0_mis	SAGA-dominated	TAF1-depleted	NA	CR
YBL031W	-1.88267	8.92717e-15	1.53848e-14	-2.33452	1.86289e-20	2.81072e-20	-3.03928	1.14617e-37	4.82571e-37	-5.64055	8.0237e-40	1.95687e-39	-0.586807	0.0629894	0.0895191	-1.48615	3.11582e-06	5.70885e-06	-2.06193	4.32911e-09	7.45302e-09	-2.86207	2.30135e-08	4.20549e-08	chrII	161699	162715	1017	+	TATA-less	1_mis	TFIID-dominated	TAF1-enriched	NA	TFIID
YBL032W	-3.08462	6.63812e-88	4.02928e-86	-3.68594	3.51911e-118	1.99484e-116	-3.26607	1.09984e-58	7.68399e-57	-4.93002	1.44136e-59	2.53686e-58	-1.69763	9.99144e-22	1.09234e-19	-2.08499	3.8563e-33	2.1559e-31	-1.69544	8.9899e-13	1.82486e-12	-2.86365	2.56042e-24	1.59637e-23	chrII	160184	161329	1146	+	TATA-less	1_mis	nocall	TAF1-enriched	NA	TFIID
YBL033C	-2.60547	1.44767e-33	6.92436e-33	-2.89755	3.04811e-41	7.27705e-41	-2.65734	2.18819e-45	2.31121e-44	-4.55357	5.94352e-72	4.17346e-70	-1.49291	1.46406e-14	4.53782e-13	-2.49473	7.50852e-42	1.00231e-39	-2.32889	1.9227e-43	9.01595e-42	-4.40615	1.28589e-82	8.38659e-80	chrII	158656	159693	1038	-	TATA-containing	0_mis	TFIID-dominated	TAF1-enriched	NA	CR
YBL034C	-1.51046	2.95222e-20	6.68955e-20	-2.17981	1.34317e-39	3.0506e-39	-2.43031	5.27383e-27	9.48809e-27	-4.03899	1.46511e-48	7.07473e-48	-0.162596	0.349549	0.408809	-0.567718	0.000987209	0.00147495	-1.3095	1.15154e-11	2.21473e-11	-1.61043	2.32947e-12	5.36659e-12	chrII	153848	158389	4542	-	TATA-less	1_mis	nocall	TAF1-depleted	NA	TFIID
YBL035C	-1.89957	1.17491e-31	5.07155e-31	-2.05701	9.01954e-35	1.8047e-34	-2.92925	4.24344e-43	3.34832e-42	-4.33734	7.9866e-37	1.68007e-36	-1.0414	5.28509e-07	3.28978e-06	-1.12983	5.51326e-08	1.20811e-07	-2.48878	3.25179e-18	9.21528e-18	-2.42022	4.40042e-07	7.53863e-07	chrII	151493	153610	2118	-	TATA-containing	0_mis	TFIID-dominated	TAF1-enriched	NA	TFIID
YBL036C	-1.53586	4.75455e-18	9.60573e-18	-2.51835	2.16427e-42	5.35137e-42	-2.36814	6.33638e-28	1.19747e-27	-3.99767	5.68591e-44	1.81911e-43	-0.571261	0.000735004	0.00179512	-0.510868	0.00205417	0.00298917	-0.82441	1.87614e-07	3.0068e-07	-0.946284	1.24672e-05	1.99048e-05	chrII	150447	151220	774	-	TATA-less	1_mis	TFIID-dominated	TAF1-enriched	NA	TFIID
YBL037W	-1.67765	2.08584e-29	7.9748e-29	-2.70129	2.02547e-70	1.42343e-69	-2.81432	2.52173e-41	1.61695e-40	-4.022	2.34923e-45	8.464e-45	-0.680717	0.000314353	0.000855297	-1.57778	7.18344e-17	4.9669e-16	-2.83959	4.41287e-35	7.04978e-34	-2.61751	1.11421e-11	2.4734e-11	chrII	147209	150286	3078	+	TATA-less	1_mis	TFIID-dominated	TAF1-depleted	NA	TFIID
YBL038W	-1.43408	1.27916e-12	2.01557e-12	-2.00863	8.10196e-23	1.26759e-22	-2.49811	9.20784e-34	2.63693e-33	-3.8757	8.8936e-36	1.78481e-35	-0.554542	0.00493907	0.00942548	-1.88301	3.65747e-21	5.00492e-20	-2.20769	7.83992e-33	9.27415e-32	-3.14599	1.2206e-37	3.43137e-36	chrII	146187	146885	699	+	TATA-less	2_mis	TFIID-dominated	TAF1-enriched	NA	TFIID
YBL039C	-2.09805	4.21338e-30	1.6734e-29	-1.50755	3.75471e-16	5.33089e-16	-2.479	1.93849e-36	7.17124e-36	-3.59594	1.73548e-47	7.5089e-47	-0.607494	0.000100655	0.000322106	-0.43577	0.0052349	0.00740037	-0.881341	6.90764e-10	1.22916e-09	-0.535831	0.0045958	0.00636657	chrII	143989	145728	1740	-	TATA-less	2_mis	TFIID-dominated	TAF1-enriched	NA	TFIID
YBL040C	-1.80181	3.98648e-28	1.40438e-27	-2.43265	2.02321e-47	5.8529e-47	-2.11373	7.587e-26	1.29382e-25	-4.06091	6.76934e-50	3.78063e-49	-0.338287	0.0463993	0.0681649	-0.998621	2.42392e-09	6.1692e-09	-1.27096	2.33424e-15	5.44544e-15	-2.09512	1.59523e-24	1.01643e-23	chrII	142112	142868	757	-	TATA-less	1_mis	TFIID-dominated	TAF1-enriched	NA	TFIID
YBL041W	-1.48074	8.02676e-17	1.5234e-16	-2.51431	8.81136e-45	2.34071e-44	-2.36595	5.7623e-33	1.54037e-32	-4.12883	2.76011e-58	4.19998e-57	-0.302802	0.0276411	0.0430474	-0.984967	1.41641e-13	6.1478e-13	-1.26266	1.31722e-14	2.94635e-14	-1.71843	1.59274e-16	4.91617e-16	chrII	141247	141972	726	+	TATA-less	2_mis	TFIID-dominated	TAF1-enriched	NA	TFIID
YBL042C	-2.47286	7.11313e-40	4.89358e-39	-1.56812	5.6547e-16	8.01024e-16	-3.32133	1.32052e-48	2.21418e-47	-4.55201	2.45469e-30	4.1775e-30	-1.7686	3.92076e-10	5.40723e-09	-0.841502	0.00219519	0.003188	-2.49966	5.68185e-18	1.5766e-17	-2.04769	6.15608e-07	1.04995e-06	chrII	138341	140260	1920	-	TATA-containing	0_mis	SAGA-dominated	TAF1-depleted	NA	TFIID
YBL043W	-4.53948	1.11723e-29	4.34416e-29	-4.23943	2.07348e-24	3.31979e-24	-4.5255	6.76442e-32	1.66004e-31	-5.06724	1.20498e-07	1.554e-07	-1.79939	0.000698118	0.00171899	-1.75939	0.00071807	0.00108174	-3.1234	3.54231e-07	5.61088e-07	-2.16589	0.0481027	0.0617206	chrII	136688	137461	774	+	NA	NA	SAGA-dominated	NA	NA	NA
YBL045C	-1.8477	3.36706e-46	3.30075e-45	-2.12594	1.20464e-58	5.28979e-58	-2.41658	2.70114e-24	4.31244e-24	-4.19337	2.43964e-47	1.0435e-46	-0.344876	0.00438365	0.00848917	-0.743571	1.22745e-09	3.21923e-09	-0.902234	0.0169032	0.0218039	-1.1435	1.88665e-08	3.45931e-08	chrII	134143	135516	1374	-	TATA-less	1_mis	TFIID-dominated	TAF1-enriched	NA	TFIID
YBL046W	-0.996679	3.82781e-06	5.07539e-06	-2.56049	1.99932e-29	3.52982e-29	-2.20368	3.86919e-20	5.52848e-20	-3.94834	4.16046e-43	1.2526e-42	-0.549086	0.0502507	0.0731616	-0.980375	0.000405267	0.000621536	-1.72298	7.26422e-19	2.16005e-18	-2.75339	1.79315e-21	8.48686e-21	chrII	132424	133749	1326	+	TATA-less	2_mis	TFIID-dominated	TAF1-enriched	NA	TFIID
YBL047C	-2.02589	1.1619e-37	7.05263e-37	-2.6642	1.79955e-63	9.39354e-63	-2.53862	7.70287e-37	2.95556e-36	-3.58534	6.00016e-50	3.37059e-49	0.0103162	0.933165	0.944208	-0.430514	0.000410386	0.000629239	-0.818642	1.1697e-05	1.74184e-05	-0.690185	0.000332939	0.000492834	chrII	127895	132040	4146	-	TATA-less	2_mis	TFIID-dominated	TAF1-enriched	NA	TFIID
YBL049W	-1.80061	0.0156187	0.0192366	-3.01452	0.000145571	0.000182137	-2.89983	1.04335e-07	1.30361e-07	-2.7919	0.00975907	0.0117454	-0.0397184	0.944769	0.953811	-0.762393	0.186791	0.227185	-1.3691	0.0397627	0.0502567	-2.44313	0.0191718	0.0254143	chrII	126828	127244	417	+	NA	NA	TFIID-dominated	NA	NA	NA
YBL050W	-1.52186	4.93122e-17	9.46899e-17	-2.76633	1.26225e-50	4.11296e-50	-2.23475	1.87031e-30	4.10611e-30	-3.67847	1.05145e-44	3.5779e-44	-0.422371	0.0133897	0.0225628	-1.22538	1.07954e-13	4.78081e-13	-1.48134	1.02904e-21	3.83931e-21	-2.2845	4.44842e-28	4.20473e-27	chrII	125125	126119	995	+	TATA-less	2_mis	TFIID-dominated	TAF1-enriched	NA	TFIID
YBL051C	-1.01701	2.48895e-11	3.7356e-11	-1.80192	6.17157e-32	1.15437e-31	-2.14851	1.62116e-24	2.60809e-24	-3.09648	5.59743e-24	8.43179e-24	0.488623	0.00150277	0.00333808	-0.193749	0.201655	0.243992	-1.08392	4.95713e-05	7.22347e-05	-1.58369	3.05228e-05	4.77271e-05	chrII	122753	124759	2007	-	TATA-less	2_mis	TFIID-dominated	TAF1-enriched	NA	TFIID
YBL052C	-1.84234	1.28447e-28	4.6788e-28	-2.80588	7.55204e-61	3.58473e-60	-2.71585	2.86248e-34	8.55936e-34	-4.14051	5.57229e-53	4.3627e-52	-0.976447	6.30111e-07	3.80407e-06	-1.6519	4.34424e-17	3.08915e-16	-2.21562	4.0824e-41	1.35761e-39	-2.07486	1.03993e-20	4.53976e-20	chrII	119379	121874	2496	-	TATA-less	3_mis	TFIID-dominated	TAF1-enriched	NA	TFIID
YBL054W	-1.22134	1.50243e-08	2.09242e-08	-0.741099	0.000754732	0.000933244	-2.20623	1.78028e-23	2.78136e-23	-2.47241	1.3953e-11	1.85811e-11	-0.385266	0.0649984	0.0920479	-0.214115	0.325471	0.379619	-0.868427	0.0154335	0.0199515	0.256481	0.640108	0.686642	chrII	117589	119166	1578	+	TATA-less	1_mis	TFIID-dominated	TAF1-enriched	NA	TFIID
YBL055C	-2.58657	3.20079e-48	3.4848e-47	-3.11807	9.27319e-62	4.53672e-61	-3.26573	3.04532e-62	3.40416e-60	-4.59787	1.64316e-42	4.75593e-42	-1.68226	2.02711e-12	4.2619e-11	-1.93385	1.03049e-15	5.95443e-15	-2.75612	6.62828e-50	6.54593e-48	-2.99472	2.22272e-30	2.71471e-29	chrII	115573	116829	1257	-	TATA-less	1_mis	TFIID-dominated	TAF1-depleted	NA	TFIID
YBL056W	-1.90875	1.50478e-45	1.43152e-44	-2.79231	5.10414e-94	1.07391e-92	-2.65183	2.34098e-42	1.665e-41	-3.93628	1.34112e-57	1.83005e-56	-0.850003	2.66764e-10	3.80107e-09	-1.32181	1.01577e-23	2.07629e-22	-1.67402	6.25232e-30	5.36926e-29	-1.73105	1.32555e-18	4.84325e-18	chrII	113762	115168	1407	+	TATA-less	2_mis	TFIID-dominated	TAF1-enriched	NA	TFIID
YBL057C	-1.66233	3.38741e-17	6.54301e-17	-2.10294	2.08827e-25	3.39983e-25	-2.48011	3.03334e-33	8.31411e-33	-4.01027	3.75986e-35	7.38282e-35	-0.730165	0.000396568	0.00104931	-1.27927	2.66908e-10	7.59393e-10	-1.75982	3.74123e-19	1.13685e-18	-2.38433	3.31343e-21	1.52184e-20	chrII	112801	113427	627	-	TATA-less	2_mis	TFIID-dominated	TAF1-enriched	NA	TFIID
YBL058W	-1.32489	1.33461e-18	2.76391e-18	-2.32579	2.06134e-53	7.40247e-53	-2.42816	3.62701e-39	1.7887e-38	-3.79689	1.71891e-49	9.14537e-49	-0.215408	0.0832914	0.114502	-1.13932	1.20904e-20	1.53263e-19	-1.51723	1.80696e-24	8.48542e-24	-2.04376	8.48787e-23	4.45357e-22	chrII	111437	112708	1272	+	TATA-containing	0_mis	TFIID-dominated	TAF1-enriched	NA	TFIID
YBL059C-A	-2.26498	1.19141e-21	2.89373e-21	-3.12084	1.04949e-35	2.15007e-35	-2.95321	1.26319e-32	3.29275e-32	-4.21988	2.16723e-31	3.77111e-31	-1.56173	3.22547e-09	3.63197e-08	-2.18989	2.90068e-16	1.84207e-15	-2.42642	3.99424e-21	1.41877e-20	-3.82984	2.44349e-35	5.38394e-34	chrII	110125	110539	415	-	NA	NA	NA	NA	NA	TFIID
YBL060W	-1.39245	1.77332e-12	2.77953e-12	-2.4686	9.52215e-34	1.86022e-33	-2.34922	3.28858e-31	7.61358e-31	-3.82146	6.62359e-37	1.39617e-36	-0.803407	0.00192579	0.00413563	-1.05514	2.83141e-05	4.74999e-05	-1.8828	4.58713e-17	1.18552e-16	-2.5757	3.96217e-18	1.39607e-17	chrII	107932	109995	2064	+	NA	NA	TFIID-dominated	NA	NA	TFIID
YBL061C	-1.50865	3.87471e-23	1.0321e-22	-2.11137	1.13301e-42	2.82697e-42	-2.61568	8.29962e-36	2.85172e-35	-4.13202	1.87433e-55	1.99288e-54	-0.576287	0.00114815	0.00263404	-1.01737	5.89611e-09	1.44444e-08	-1.85857	3.44655e-28	2.41037e-27	-2.26946	8.42647e-23	4.42491e-22	chrII	105316	107406	2091	-	TATA-less	1_mis	TFIID-dominated	TAF1-enriched	NA	TFIID
YBL063W	-2.21949	1.1271e-39	7.63908e-39	-3.70434	3.59147e-101	1.04381e-99	-3.32071	2.8188e-53	8.0109e-52	-5.06003	1.80344e-58	2.79471e-57	-1.07532	1.94448e-06	1.02293e-05	-1.71336	3.41694e-15	1.84408e-14	-2.51772	8.87533e-37	1.77452e-35	-2.31552	1.23041e-15	3.53202e-15	chrII	101886	105221	3336	+	TATA-less	1_mis	TFIID-dominated	TAF1-enriched	NA	TFIID
YBL064C	-1.92198	1.13655e-26	3.6876e-26	-4.32749	2.79314e-127	2.20208e-125	-2.08126	7.88423e-30	1.6655e-29	-3.85635	4.10847e-58	6.0735e-57	-0.220636	0.171907	0.218721	-2.16372	4.87202e-44	9.1051e-42	-1.47082	1.19879e-24	5.76656e-24	-2.25634	7.16659e-30	8.15716e-29	chrII	100371	101156	786	-	TATA-containing	0_mis	SAGA-dominated	TAF1-depleted	NA	CR
YBL066C	-0.930183	2.24809e-09	3.19314e-09	-1.92404	3.09881e-34	6.11823e-34	-2.07433	1.52495e-20	2.20095e-20	-2.84228	4.12847e-24	6.22735e-24	-0.314479	0.108773	0.145507	-0.61218	0.0015867	0.00233227	-1.83602	6.2807e-08	1.03352e-07	-1.74814	0.000620804	0.000905386	chrII	96669	100115	3447	-	NA	NA	TFIID-dominated	NA	NA	TFIID
YBL067C	-1.8031	2.09705e-31	8.93952e-31	-2.67617	1.8559e-64	1.02082e-63	-2.6829	5.69477e-36	1.99347e-35	-3.72006	6.82086e-44	2.17089e-43	-0.801836	2.46704e-06	1.27006e-05	-1.06586	2.16796e-10	6.23049e-10	-1.91783	2.88339e-30	2.58158e-29	-2.04397	3.64104e-18	1.28849e-17	chrII	93639	95882	2244	-	TATA-less	2_mis	TFIID-dominated	TAF1-enriched	NA	TFIID
YBL068W	-1.73265	1.09432e-23	2.98804e-23	-2.00896	7.16223e-30	1.27765e-29	-2.49619	4.93576e-35	1.58317e-34	-3.82143	1.10681e-35	2.21133e-35	-0.593392	0.00211533	0.00449133	-0.987992	2.47921e-07	5.09472e-07	-1.79472	2.92402e-21	1.04949e-20	-2.30162	6.7762e-19	2.54576e-18	chrII	92414	93394	981	+	TATA-less	1_mis	TFIID-dominated	TAF1-enriched	NA	TFIID
YBL069W	-2.7214	1.92013e-38	1.21272e-37	-3.65643	1.36375e-60	6.41123e-60	-3.15406	3.78156e-53	1.05679e-51	-4.67522	3.50775e-13	4.71877e-13	-1.83668	1.0269e-10	1.59554e-09	-2.16804	2.37309e-15	1.31101e-14	-2.52758	2.22631e-28	1.61413e-27	-3.95379	3.82574e-21	1.74608e-20	chrII	90741	92030	1290	+	TATA-containing	0_mis	SAGA-dominated	TAF1-enriched	NA	TFIID
YBL071W-A	-1.97252	1.6306e-15	2.90802e-15	-1.90019	2.03479e-13	2.80085e-13	-2.67215	1.50015e-18	2.08269e-18	-4.19991	2.18565e-19	3.10832e-19	-0.969005	0.00178185	0.00386796	-1.2651	7.24049e-05	0.000117548	-2.09087	4.57669e-07	7.21075e-07	-2.74889	1.22756e-09	2.42243e-09	chrII	89978	90226	249	+	TATA-less	1_mis	NA	TAF1-enriched	NA	NA
YBL072C	-2.79243	7.599e-81	3.31984e-79	-2.97336	4.28285e-89	7.04462e-88	-2.87718	8.66365e-40	4.59344e-39	-3.86548	1.59404e-45	5.85263e-45	0.121215	0.334772	0.393468	0.178406	0.154644	0.19053	-0.00727877	0.969607	0.972591	0.130629	0.470448	0.526198	chrII	88523	89125	603	-	TATA-less	2_mis	TFIID-dominated	TAF1-enriched	RPG	TFIID
YBL074C	-1.50143	5.63962e-13	8.99376e-13	-2.61694	9.82561e-33	1.87101e-32	-2.43527	3.89481e-32	9.75813e-32	-3.71887	3.1204e-37	6.69893e-37	-0.588429	0.0526532	0.0760701	-1.24191	2.71024e-05	4.5549e-05	-2.24966	1.60265e-19	5.00291e-19	-2.32161	6.18304e-12	1.38911e-11	chrII	86722	87789	1068	-	TATA-less	2_mis	TFIID-dominated	TAF1-enriched	NA	TFIID
YBL075C	-0.822285	2.8576e-06	3.79924e-06	-2.28616	1.11731e-37	2.40692e-37	-1.66175	5.96166e-16	8.00177e-16	-3.28881	7.30998e-35	1.41966e-34	0.319029	0.130692	0.171546	-0.112296	0.570605	0.625495	-1.05456	2.20998e-07	3.53142e-07	-1.5966	1.6598e-08	3.04936e-08	chrII	84499	86448	1950	-	NA	NA	nocall	NA	NA	TFIID
YBL076C	-1.92031	4.12682e-45	3.86692e-44	-2.23787	1.84768e-60	8.62714e-60	-2.32693	1.40663e-28	2.75533e-28	-3.51634	1.25406e-43	3.90106e-43	0.248982	0.0291388	0.0451228	-0.00243591	0.982922	0.988613	-0.110852	0.440926	0.498605	0.0198383	0.916561	0.928232	chrII	81043	84261	3219	-	TATA-less	2_mis	TFIID-dominated	TAF1-enriched	NA	TFIID
YBL078C	-0.714443	0.00466734	0.00583227	-3.13205	3.90152e-33	7.51911e-33	-2.16859	1.19705e-14	1.58544e-14	-4.60945	4.25509e-35	8.33583e-35	0.553291	0.0582087	0.0833354	-0.979486	0.000502279	0.000765116	-0.887155	0.00738337	0.00970454	-2.17246	3.31416e-09	6.34427e-09	chrII	80378	80731	354	-	TATA-less	1_mis	SAGA-dominated	TAF1-enriched	NA	TFIID
YBL079W	-1.58912	1.20766e-29	4.67987e-29	-2.08213	3.01762e-49	9.31495e-49	-2.36931	5.13732e-30	1.09802e-29	-3.63157	3.26299e-39	7.67207e-39	-0.34809	0.009244	0.0162526	-0.629792	2.22095e-06	4.13881e-06	-1.30789	1.71379e-16	4.2914e-16	-1.37521	7.65425e-13	1.8226e-12	chrII	75259	79767	4509	+	TATA-less	1_mis	nocall	TAF1-enriched	NA	TFIID
YBL080C	-2.45216	1.29351e-34	6.61612e-34	-4.15808	5.54521e-74	4.46415e-73	-3.03573	5.56223e-47	7.2721e-46	-4.49654	2.84481e-50	1.65746e-49	-1.41402	8.80512e-06	3.86294e-05	-2.61054	6.89317e-17	4.77739e-16	-2.76467	2.54391e-26	1.45322e-25	-3.74845	3.06528e-29	3.22968e-28	chrII	73070	74695	1626	-	TATA-less	1_mis	TFIID-dominated	TAF1-enriched	NA	TFIID
YBL082C	-2.16589	5.2849e-17	1.01283e-16	-2.30113	4.74997e-18	6.9275e-18	-2.87723	1.50456e-40	8.80549e-40	-4.05879	2.0488e-29	3.40423e-29	-0.86371	0.000558075	0.00140937	-1.26423	2.69853e-07	5.51768e-07	-1.42145	5.45229e-10	9.73911e-10	-1.85448	8.86318e-09	1.65918e-08	chrII	69751	71127	1377	-	TATA-less	2_mis	TFIID-dominated	TAF1-enriched	NA	TFIID
YBL084C	-0.704934	3.10719e-05	4.06257e-05	-1.26318	1.4703e-13	2.02588e-13	-1.39369	1.2251e-10	1.56479e-10	-3.12787	3.7228e-26	5.80509e-26	-0.128588	0.558284	0.612249	-0.679573	0.00149182	0.00219528	-1.192	1.08965e-07	1.77293e-07	-1.73744	9.48464e-09	1.77094e-08	chrII	67169	69445	2277	-	TATA-less	2_mis	nocall	TAF1-enriched	NA	TFIID
YBL085W	-2.16014	1.55109e-42	1.26054e-41	-2.99833	1.84325e-78	1.79586e-77	-2.78428	4.98782e-37	1.94836e-36	-4.29302	2.52022e-43	7.70468e-43	-1.13819	1.13253e-11	2.09535e-10	-1.724	1.28121e-25	3.26085e-24	-2.10185	1.9182e-32	2.19734e-31	-2.52179	1.15555e-31	1.61037e-30	chrII	63876	66818	2943	+	TATA-less	2_mis	nocall	TAF1-enriched	NA	TFIID
YBL087C	-2.80291	4.99755e-79	2.01637e-77	-2.86129	4.60837e-79	4.58098e-78	-2.67871	6.81754e-38	2.94621e-37	-3.85848	8.43138e-47	3.46138e-46	0.00932433	0.944034	0.953389	0.0572137	0.665221	0.712846	0.148543	0.340784	0.392652	0.110184	0.52481	0.579842	chrII	59822	60739	918	-	TATA-less	2_mis	TFIID-dominated	TAF1-enriched	RPG	TFIID
YBL088C	-2.18129	1.44677e-51	1.82752e-50	-3.39317	3.00759e-117	1.66363e-115	-3.07028	1.48819e-44	1.43822e-43	-4.52493	5.50849e-71	3.50309e-69	-1.0351	1.04737e-08	1.04442e-07	-1.74806	1.34686e-22	2.32449e-21	-2.67492	8.23169e-46	5.26021e-44	-3.12374	3.82359e-34	7.31305e-33	chrII	51019	59382	8364	-	TATA-less	1_mis	TFIID-dominated	TAF1-enriched	NA	TFIID
YBL089W	-1.93956	6.20152e-22	1.52898e-21	-2.74191	8.41642e-39	1.87186e-38	-2.58072	2.41105e-33	6.6684e-33	-4.22868	7.87081e-36	1.58427e-35	-1.05062	0.00132639	0.00298598	-1.86809	8.55844e-09	2.05509e-08	-1.85691	2.11114e-09	3.68122e-09	-3.01909	2.05719e-09	3.99909e-09	chrII	49574	50953	1380	+	NA	NA	TFIID-dominated	NA	NA	TFIID
YBL090W	-1.96566	1.10179e-24	3.17261e-24	-3.10918	5.44956e-54	1.9914e-53	-2.75767	2.95748e-40	1.66547e-39	-4.6625	5.68167e-49	2.87107e-48	-0.984366	6.12414e-05	0.000208165	-2.41961	8.45297e-22	1.28782e-20	-2.17083	2.72186e-28	1.94883e-27	-3.83354	2.16356e-39	7.27881e-38	chrII	48825	49358	534	+	TATA-less	1_mis	TFIID-dominated	TAF1-enriched	NA	TFIID
YBL091C	-1.94951	2.67097e-24	7.54538e-24	-2.66246	5.96225e-42	1.45482e-41	-2.44386	4.28869e-35	1.37958e-34	-3.22326	3.68811e-33	6.77242e-33	-0.39589	0.00224597	0.00472864	-0.750665	2.28429e-09	5.8297e-09	-0.561343	0.000119425	0.00017078	-0.441729	0.0164406	0.0219231	chrII	47363	48628	1266	-	NA	NA	TFIID-dominated	NA	NA	TFIID
YBL091C-A	-2.2717	5.52228e-14	9.20469e-14	-4.34752	4.77735e-36	9.86093e-36	-2.81513	1.32622e-30	2.94048e-30	-4.82274	1.42379e-27	2.27597e-27	-1.10009	0.00293443	0.00596711	-1.96407	2.72659e-08	6.18398e-08	-1.91928	7.84616e-16	1.87331e-15	-3.00681	1.31437e-18	4.8051e-18	chrII	46565	47180	616	-	TATA-containing	0_mis	NA	TAF1-enriched	NA	TFIID
YBL092W	-3.05085	3.886e-100	4.1647e-98	-2.86961	8.71129e-87	1.27946e-85	-2.80923	4.28426e-39	2.10356e-38	-3.80398	4.20429e-46	1.62507e-45	0.0348354	0.789403	0.81797	-0.0542016	0.67723	0.723344	0.016099	0.923141	0.934467	-0.123351	0.467624	0.523219	chrII	45978	46370	393	+	TATA-less	1_mis	TFIID-dominated	TAF1-enriched	RPG	TFIID
YBL093C	-1.97477	5.85819e-28	2.04485e-27	-2.2124	6.76113e-32	1.26292e-31	-2.49745	1.43532e-34	4.40177e-34	-4.25688	1.0764e-43	3.36083e-43	-1.02727	5.92726e-07	3.61834e-06	-1.32119	1.60501e-10	4.70146e-10	-2.52791	3.21379e-42	1.24687e-40	-2.92017	1.34834e-28	1.33646e-27	chrII	44256	44918	663	-	TATA-less	1_mis	TFIID-dominated	TAF1-enriched	NA	TFIID
YBL097W	-2.46214	1.34059e-22	3.44774e-22	-3.62954	3.20757e-42	7.88557e-42	-2.85294	3.57956e-33	9.74354e-33	-4.57418	1.22878e-47	5.38569e-47	-1.59591	2.8484e-06	1.44413e-05	-1.53953	2.82871e-06	5.2076e-06	-2.5114	2.73803e-34	3.89661e-33	-3.68747	1.34897e-37	3.77594e-36	chrII	40831	43095	2265	+	TATA-less	2_mis	TFIID-dominated	TAF1-enriched	NA	TFIID
YBL098W	-1.78198	9.17713e-16	1.65473e-15	-2.69807	3.74543e-28	6.4273e-28	-1.64955	1.42655e-13	1.86654e-13	-3.09313	1.59362e-12	2.13401e-12	-0.0552238	0.807516	0.834294	-0.025306	0.913114	0.930324	-0.524331	0.00487189	0.00646478	-1.19688	9.75614e-06	1.56839e-05	chrII	39145	40527	1383	+	NA	NA	SAGA/TFIID-dominated	NA	NA	NA
YBL099W	-1.92042	3.27688e-46	3.22469e-45	-2.18381	1.45837e-58	6.3713e-58	-2.46337	4.3083e-30	9.25553e-30	-3.91454	8.40818e-53	6.44086e-52	0.0230233	0.820668	0.845124	-0.362442	0.000356308	0.000549673	-0.633831	0.000927261	0.00127159	-0.708869	0.000199477	0.000299215	chrII	37053	38690	1638	+	TATA-less	2_mis	TFIID-dominated	TAF1-enriched	NA	TFIID
YBL101C	-2.15334	4.61491e-38	2.85168e-37	-4.03427	1.22545e-122	8.08205e-121	-3.31689	9.89601e-62	1.00564e-59	-4.85496	1.91282e-67	8.31892e-66	-1.18193	1.73737e-10	2.58585e-09	-2.01561	7.35911e-30	2.95312e-28	-3.05009	2.87511e-21	1.03364e-20	-2.12684	1.20695e-05	1.92981e-05	chrII	24946	28299	3354	-	NA	NA	SAGA-dominated	NA	NA	TFIID
YBL102W	-2.09373	3.18029e-28	1.12732e-27	-2.78785	1.89721e-45	5.12119e-45	-2.57346	2.50364e-35	8.21521e-35	-4.21349	8.04924e-46	3.02284e-45	-0.574937	0.00623173	0.0115155	-1.34178	7.94878e-11	2.41828e-10	-1.26561	2.36877e-12	4.71008e-12	-1.50411	2.39239e-12	5.50569e-12	chrII	24098	24745	648	+	TATA-less	2_mis	TFIID-dominated	TAF1-depleted	NA	TFIID
YBL103C	-0.991824	2.63685e-09	3.73527e-09	-1.73972	4.31952e-25	6.98764e-25	-1.96951	6.96398e-19	9.71654e-19	-3.418	3.49394e-28	5.64948e-28	-0.313391	0.155098	0.199701	-1.18152	5.7723e-08	1.26192e-07	-1.86269	5.60281e-09	9.61029e-09	-3.01994	4.43241e-10	8.96101e-10	chrII	22076	23536	1461	-	TATA-less	1_mis	TFIID-dominated	TAF1-enriched	NA	TFIID
YBL104C	-1.30473	8.39566e-17	1.59165e-16	-2.31206	8.26769e-48	2.43069e-47	-2.4501	1.2574e-28	2.4659e-28	-3.98557	2.11058e-45	7.63685e-45	-0.490523	0.00882334	0.0155906	-1.0633	8.98016e-09	2.15162e-08	-2.18866	5.70798e-23	2.32529e-22	-3.20922	1.98723e-21	9.33769e-21	chrII	18177	21293	3117	-	TATA-less	1_mis	nocall	TAF1-enriched	NA	TFIID
YBL105C	-1.28816	1.95163e-20	4.45614e-20	-2.40308	5.27365e-66	3.09957e-65	-2.12857	4.05577e-23	6.26343e-23	-3.36918	1.52521e-38	3.45247e-38	-0.550418	0.000198004	0.000575447	-0.807264	2.03242e-08	4.66295e-08	-1.63229	3.36829e-24	1.54283e-23	-1.72807	4.33443e-17	1.39532e-16	chrII	14241	17696	3456	-	TATA-less	2_mis	nocall	TAF1-enriched	NA	TFIID
YBL106C	0.540316	0.00212461	0.00267291	0.0561578	0.752975	0.777809	-0.362349	0.0820808	0.0936251	-0.87269	0.00153414	0.00188132	1.09647	5.19465e-07	3.24356e-06	1.2507	2.88739e-09	7.29205e-09	-0.0588011	0.761669	0.801382	0.431657	0.0792199	0.0992265	chrII	10847	13879	3033	-	NA	NA	TFIID-dominated	NA	NA	CR
YBL107C	-2.11626	2.98338e-19	6.39469e-19	-3.85085	4.47189e-49	1.37115e-48	-2.94063	6.37397e-35	2.01842e-34	-3.65536	5.78608e-25	8.84444e-25	-1.11894	0.000420383	0.00110402	-1.39215	6.13378e-06	1.09471e-05	-2.35576	1.19598e-21	4.43929e-21	-2.21129	9.01781e-11	1.89846e-10	chrII	9961	10551	591	-	TATA-containing	0_mis	nocall	TAF1-enriched	NA	TFIID
YBR001C	-1.53638	1.90188e-25	5.76702e-25	-2.88225	2.15888e-83	2.65372e-82	-1.59802	1.16419e-15	1.55728e-15	-4.57185	6.84224e-66	2.4665e-64	-0.635078	0.00115224	0.00264241	-1.45832	3.1383e-15	1.70354e-14	-1.19557	4.0279e-13	8.33455e-13	-3.41672	1.45125e-45	8.45094e-44	chrII	238941	241283	2343	-	TATA-containing	0_mis	TFIID-dominated	TAF1-depleted	NA	CR
YBR002C	-1.8756	4.97047e-24	1.38587e-23	-2.69182	5.70605e-44	1.47913e-43	-2.60574	1.61412e-33	4.52209e-33	-3.64566	7.67653e-37	1.6166e-36	-1.10301	5.35193e-07	3.32126e-06	-1.36923	5.42849e-10	1.49067e-09	-2.38579	4.98524e-29	3.86831e-28	-3.2768	1.46251e-27	1.29599e-26	chrII	241708	242568	861	-	TATA-less	2_mis	TFIID-dominated	TAF1-enriched	NA	TFIID
YBR003W	-1.62514	4.14926e-24	1.15973e-23	-2.766	9.73223e-64	5.14675e-63	-2.46073	8.08379e-34	2.32895e-33	-3.98727	4.12159e-41	1.087e-40	-0.921239	1.17389e-06	6.5418e-06	-1.88697	2.45897e-23	4.78695e-22	-2.24128	2.22358e-24	1.03598e-23	-3.62732	5.88512e-24	3.50527e-23	chrII	242809	244230	1422	+	TATA-less	2_mis	TFIID-dominated	TAF1-enriched	NA	TFIID
YBR004C	-1.73248	3.61457e-19	7.71386e-19	-2.65739	8.55187e-39	1.90075e-38	-2.84186	4.42839e-41	2.77064e-40	-3.86845	4.60582e-36	9.38001e-36	-0.69414	0.0137943	0.0231691	-1.52736	1.22476e-07	2.58843e-07	-2.15181	7.6179e-19	2.26109e-18	-3.22265	2.11826e-20	9.00021e-20	chrII	244366	245667	1302	-	NA	NA	SAGA-dominated	NA	NA	TFIID
YBR005W	-1.3285	2.57705e-09	3.65282e-09	-2.022	3.77797e-18	5.51812e-18	-2.18848	4.35022e-22	6.52874e-22	-4.39069	6.02941e-33	1.09968e-32	-0.6985	0.0231634	0.0367834	-1.1956	8.75079e-05	0.000141296	-1.76187	6.04131e-11	1.1241e-10	-3.42733	1.28429e-17	4.34448e-17	chrII	245906	246547	642	+	TATA-less	1_mis	SAGA-dominated	TAF1-depleted	NA	TFIID
YBR006W	-1.98524	1.96543e-22	4.99663e-22	-3.95813	3.36637e-67	2.07085e-66	-2.75168	8.40032e-36	2.88484e-35	-4.41353	2.55974e-36	5.25432e-36	-0.803575	0.00168028	0.00368742	-1.74315	1.37907e-11	4.61171e-11	-1.7409	1.57179e-15	3.69453e-15	-2.17944	1.79913e-13	4.43961e-13	chrII	247010	248503	1494	+	NA	NA	SAGA-dominated	NA	NA	TFIID
YBR007C	-1.78999	3.92429e-22	9.80571e-22	-2.4987	3.27119e-39	7.36124e-39	-1.89049	2.47936e-16	3.34252e-16	-1.67779	5.15974e-08	6.67341e-08	-0.819975	0.000492888	0.00126981	-1.49016	3.20186e-10	9.02343e-10	-2.39855	1.87889e-08	3.15391e-08	-1.02059	0.0516966	0.0661644	chrII	248806	251016	2211	-	TATA-less	2_mis	TFIID-dominated	TAF1-depleted	NA	CR
YBR008C	-1.60142	2.53477e-06	3.37395e-06	-6.86708	4.08515e-90	7.02257e-89	-3.37575	1.30308e-69	3.36144e-67	-4.27374	3.41851e-66	1.30933e-64	-0.577241	0.228954	0.281707	-3.24909	1.09469e-11	3.70429e-11	-3.30839	3.13276e-111	5.10482e-108	-4.20945	3.59902e-115	7.82427e-112	chrII	252563	254209	1647	-	TATA-less	2_mis	TFIID-dominated	TAF1-enriched	NA	CR
YBR009C	-2.57638	1.65396e-67	4.15551e-66	-2.83954	7.49876e-81	7.96192e-80	-2.37246	4.0853e-33	1.10663e-32	-4.6647	8.25228e-81	1.91823e-78	-1.48809	6.79314e-22	7.707e-20	-1.30028	2.5415e-17	1.89339e-16	-1.7819	1.30321e-31	1.37005e-30	-2.91833	5.30096e-48	3.67796e-46	chrII	255373	255684	312	-	TATA-containing	0_mis	TFIID-dominated	TAF1-depleted	NA	CR
YBR010W	-2.48043	4.77843e-45	4.45316e-44	-2.35152	1.85159e-40	4.31827e-40	-2.05681	8.6096e-27	1.53087e-26	-4.84451	1.76165e-82	5.39787e-80	-1.17251	8.05756e-18	4.14103e-16	-1.24273	3.19417e-20	3.78498e-19	-1.44931	6.88948e-19	2.05706e-18	-2.88214	7.50389e-39	2.38733e-37	chrII	256331	256741	411	+	TATA-containing	0_mis	TFIID-dominated	TAF1-depleted	NA	CR
YBR011C	-1.86904	3.4728e-37	2.04991e-36	-2.17418	2.5816e-49	7.99063e-49	-2.32097	2.93851e-31	6.82666e-31	-3.42838	7.71255e-38	1.69239e-37	0.0801864	0.448734	0.507569	-0.282792	0.00734465	0.0102477	-0.550983	0.00120294	0.00164308	-0.406724	0.0193813	0.0256763	chrII	257112	257975	864	-	TATA-less	2_mis	TFIID-dominated	TAF1-enriched	NA	TFIID
YBR014C	-2.37534	1.28019e-33	6.13186e-33	-3.42631	6.10619e-61	2.90245e-60	-2.61318	2.17769e-27	4.00378e-27	-4.27338	8.64225e-34	1.61736e-33	-0.839858	2.52416e-05	9.61227e-05	-1.61765	3.49844e-16	2.18352e-15	-1.45025	2.45039e-13	5.12899e-13	-1.96524	5.09339e-15	1.39517e-14	chrII	266725	267336	612	-	TATA-less	2_mis	TFIID-dominated	TAF1-depleted	NA	TFIID
YBR015C	-2.44633	1.4545e-61	2.90012e-60	-2.96724	1.2909e-86	1.86799e-85	-2.80993	2.97605e-35	9.72252e-35	-4.25689	4.16858e-35	8.16968e-35	-1.27787	4.42535e-18	2.41906e-16	-1.73168	1.75142e-32	9.31384e-31	-2.26277	1.2984e-25	6.79757e-25	-2.89732	3.1222e-14	8.16151e-14	chrII	267710	269503	1794	-	TATA-less	1_mis	TFIID-dominated	TAF1-enriched	NA	TFIID
YBR016W	-2.30362	1.84052e-25	5.59085e-25	-3.02474	1.74259e-40	4.07515e-40	-2.87617	4.76727e-12	6.15715e-12	-3.92654	2.08347e-10	2.74685e-10	-1.04409	9.46296e-07	5.43197e-06	-1.46331	2.79474e-13	1.16066e-12	-1.62922	0.0271154	0.0345394	-2.39449	0.00203592	0.0028797	chrII	270247	270633	387	+	TATA-containing	0_mis	TFIID-dominated	TAF1-enriched	NA	TFIID
YBR017C	-1.44893	8.91699e-26	2.77e-25	-1.88483	6.15711e-42	1.5013e-41	-1.98628	5.17605e-19	7.24755e-19	-3.28551	2.02824e-40	5.11691e-40	-0.0290648	0.841728	0.865329	-0.344827	0.0171105	0.0231574	-0.778749	4.23667e-07	6.68797e-07	-0.630309	0.000865649	0.00125211	chrII	270947	273703	2757	-	TATA-less	1_mis	nocall	TAF1-enriched	NA	TFIID
YBR018C	-0.89095	0.0291256	0.0355214	-1.64299	0.000125398	0.000157039	-1.58417	2.24796e-07	2.7993e-07	-2.71646	1.12418e-06	1.43729e-06	0.780407	0.1478	0.191123	-0.0871414	0.866821	0.89402	-0.240156	0.640061	0.697062	-1.58836	0.052007	0.0665209	chrII	274427	275527	1101	-	NA	NA	nocall	NA	NA	NA
YBR019C	-0.55003	0.311492	0.354551	-0.111016	0.84995	0.865085	0.383152	0.321953	0.35428	0.495265	0.471655	0.511902	0.577509	0.318629	0.376644	0.782299	0.165726	0.203187	-0.532764	0.324384	0.374882	0.342164	0.654807	0.700566	chrII	276253	278352	2100	-	NA	NA	TFIID-dominated	NA	NA	NA
YBR020W	-1.45941	1.99696e-05	2.61896e-05	-3.07538	2.03555e-16	2.90026e-16	-2.00913	4.251e-14	5.59487e-14	-3.02068	2.25817e-10	2.97428e-10	-1.07409	0.0247825	0.0390917	-1.46963	0.00132523	0.00196028	-1.21608	0.0400415	0.0505992	-0.730661	0.395099	0.449552	chrII	279021	280607	1587	+	NA	NA	nocall	NA	NA	NA
YBR021W	-2.18893	1.70523e-15	3.0353e-15	-2.66295	1.08524e-18	1.59495e-18	-2.69446	4.50974e-25	7.41525e-25	-3.32653	3.31394e-14	4.49211e-14	-0.977563	0.0210751	0.0338112	-0.703048	0.104436	0.131292	-1.72759	8.7186e-07	1.35822e-06	-0.862214	0.100898	0.125059	chrII	281443	283344	1902	+	TATA-less	1_mis	TFIID-dominated	TAF1-enriched	NA	NA
YBR022W	-2.30176	1.64798e-25	5.03048e-25	-3.62202	3.74295e-49	1.15177e-48	-3.1128	1.31693e-39	6.80482e-39	-4.50933	2.45706e-33	4.5279e-33	-1.27662	4.77397e-05	0.000167479	-1.87819	1.7379e-09	4.48603e-09	-2.73765	4.36868e-26	2.41314e-25	-3.9646	3.52138e-30	4.14557e-29	chrII	283738	284271	534	+	TATA-less	2_mis	TFIID-dominated	TAF1-depleted	NA	TFIID
YBR023C	-1.98313	5.97752e-52	7.64922e-51	-2.78991	1.80979e-98	4.51809e-97	-2.79963	1.06103e-39	5.56832e-39	-3.62153	8.57856e-48	3.81452e-47	-0.995219	3.67376e-12	7.41286e-11	-1.26948	3.47385e-19	3.45326e-18	-2.24433	2.5508e-39	6.95654e-38	-2.28777	7.45386e-34	1.37328e-32	chrII	284428	287925	3498	-	TATA-less	1_mis	TFIID-dominated	TAF1-enriched	NA	TFIID
YBR024W	-2.22123	9.08455e-19	1.9003e-18	-3.77898	2.92275e-41	6.9875e-41	-3.06824	1.86674e-42	1.34771e-41	-4.69091	4.58608e-27	7.26723e-27	-1.03217	0.00100942	0.00235531	-2.15716	7.54822e-12	2.60268e-11	-2.40273	5.21165e-18	1.45045e-17	-2.70219	2.34819e-09	4.54314e-09	chrII	289445	290350	906	+	TATA-less	2_mis	TFIID-dominated	TAF1-enriched	NA	TFIID
YBR025C	-2.35178	1.2392e-57	2.06302e-56	-2.84889	6.76074e-83	8.05068e-82	-2.62233	6.83923e-37	2.6408e-36	-3.76748	4.27097e-51	2.73675e-50	-0.186554	0.0827272	0.113804	-0.529774	6.88387e-07	1.35502e-06	-0.395974	0.00847423	0.0111115	-0.459729	0.0146557	0.0196071	chrII	290681	291865	1185	-	TATA-less	2_mis	TFIID-dominated	TAF1-enriched	NA	TFIID
YBR026C	-2.52768	7.28783e-46	7.03055e-45	-4.09954	3.26809e-100	9.00235e-99	-2.99259	6.59939e-48	9.94653e-47	-4.61863	1.27001e-54	1.22128e-53	-0.642082	0.000260378	0.000727534	-1.14091	5.3735e-11	1.67851e-10	-1.11918	4.95851e-09	8.5186e-09	-1.37565	1.03989e-09	2.0602e-09	chrII	292877	294019	1143	-	TATA-less	2_mis	TFIID-dominated	TAF1-depleted	NA	TFIID
YBR028C	-2.06608	1.72247e-38	1.08989e-37	-2.93777	1.49284e-71	1.09045e-70	-2.79923	5.4854e-33	1.47045e-32	-4.52654	1.43304e-44	4.8156e-44	-1.18914	4.87467e-09	5.27184e-08	-1.94407	7.73392e-22	1.18545e-20	-2.48401	7.29726e-32	7.84876e-31	-3.31344	2.17094e-27	1.88282e-26	chrII	294425	296002	1578	-	TATA-less	1_mis	TFIID-dominated	TAF1-enriched	NA	TFIID
YBR029C	-1.75718	8.22286e-24	2.26599e-23	-2.39714	6.36242e-42	1.55081e-41	-2.74967	8.46299e-37	3.23058e-36	-3.9592	6.27593e-42	1.74674e-41	-0.696465	0.000187109	0.000547488	-1.23631	1.72498e-11	5.69855e-11	-2.14006	5.69299e-24	2.5468e-23	-2.41831	2.92869e-18	1.04377e-17	chrII	296369	297742	1374	-	TATA-less	2_mis	TFIID-dominated	TAF1-enriched	NA	TFIID
YBR030W	-1.38576	7.16349e-17	1.36333e-16	-1.65752	1.67552e-22	2.61072e-22	-2.46419	4.1687e-32	1.04306e-31	-3.87892	3.26889e-46	1.27595e-45	-0.32031	0.162518	0.208229	-1.16728	4.2735e-07	8.59298e-07	-1.90911	6.84832e-22	2.58767e-21	-2.32635	9.21352e-17	2.89175e-16	chrII	298292	299950	1659	+	TATA-less	1_mis	TFIID-dominated	TAF1-enriched	NA	TFIID
YBR031W	-2.34169	4.25331e-36	2.36031e-35	-1.66989	3.86903e-19	5.72303e-19	-2.28272	1.26782e-32	3.30353e-32	-4.05634	2.97727e-42	8.47184e-42	-0.77008	3.25859e-11	5.61431e-10	-1.02498	4.34609e-19	4.24295e-18	-0.744125	8.09603e-06	1.21534e-05	-1.45003	1.78386e-16	5.47756e-16	chrII	300166	301254	1089	+	TATA-containing	0_mis	TFIID-dominated	TAF1-depleted	RPG	TFIID
YBR034C	-2.51164	5.03678e-42	3.9573e-41	-1.81934	1.22619e-22	1.91451e-22	-2.80755	1.50435e-46	1.865e-45	-4.22992	3.53944e-57	4.51881e-56	-1.23574	8.60664e-13	1.93827e-11	-0.957011	2.65403e-08	6.02777e-08	-2.20115	5.65469e-47	4.28573e-45	-2.45873	3.43708e-31	4.5655e-30	chrII	304930	305976	1047	-	TATA-containing	0_mis	TFIID-dominated	TAF1-depleted	NA	TFIID
YBR035C	-1.87931	6.77e-27	2.22285e-26	-2.76654	1.15815e-54	4.3149e-54	-2.44733	1.12931e-35	3.82928e-35	-3.97231	1.44621e-39	3.4743e-39	-0.249158	0.0954026	0.129202	-0.866787	2.04155e-09	5.24089e-09	-0.822565	1.70974e-07	2.74484e-07	-0.989818	1.93306e-07	3.36736e-07	chrII	306269	306955	687	-	TATA-less	1_mis	TFIID-dominated	TAF1-enriched	NA	TFIID
YBR036C	-1.86216	4.41789e-34	2.19106e-33	-2.64248	7.55608e-65	4.19993e-64	-2.52548	1.56607e-36	5.82242e-36	-3.75748	6.61015e-53	5.12173e-52	-0.860586	2.87773e-08	2.55114e-07	-1.39123	4.91753e-20	5.64308e-19	-2.03027	1.31784e-33	1.71451e-32	-2.73529	2.28611e-30	2.78171e-29	chrII	309081	310313	1233	-	TATA-less	2_mis	TFIID-dominated	TAF1-enriched	NA	TFIID
YBR037C	-1.70826	2.90539e-15	5.12026e-15	-3.23968	1.29e-44	3.40574e-44	-2.52099	2.68243e-31	6.25558e-31	-4.31231	1.75847e-38	3.96849e-38	-1.08552	0.000130204	0.000399244	-2.34563	6.27741e-16	3.75325e-15	-2.62162	2.62305e-29	2.10814e-28	-4.12518	3.38992e-28	3.2418e-27	chrII	310565	311452	888	-	TATA-less	1_mis	TFIID-dominated	TAF1-enriched	NA	TFIID
YBR038W	-1.98997	1.21994e-35	6.5474e-35	-3.0681	1.17404e-79	1.193e-78	-2.89581	7.68566e-40	4.10085e-39	-4.10511	2.31009e-52	1.70376e-51	-1.03706	2.0706e-10	3.01466e-09	-1.56087	2.64965e-22	4.36858e-21	-2.36196	1.8622e-20	6.26629e-20	-2.36576	6.1596e-11	1.31413e-10	chrII	311898	314789	2892	+	TATA-less	2_mis	TFIID-dominated	TAF1-enriched	NA	TFIID
YBR039W	-1.59683	1.42636e-28	5.19013e-28	-1.83895	1.84905e-36	3.85022e-36	-2.15631	3.07563e-21	4.52176e-21	-4.06399	1.53657e-50	9.22354e-50	-0.0567988	0.614428	0.663414	-0.708851	3.43056e-10	9.62647e-10	-0.583452	0.00102049	0.00139826	-0.799873	3.63179e-05	5.64637e-05	chrII	315575	316510	936	+	TATA-less	1_mis	TFIID-dominated	TAF1-enriched	NA	TFIID
YBR040W	-2.8546	5.46973e-08	7.52142e-08	-2.5748	6.13196e-05	7.71019e-05	-2.59175	1.82779e-07	2.27777e-07	-2.25031	0.0118557	0.0142383	-0.314281	0.588842	0.640272	0.095888	0.869053	0.895757	-0.62495	0.280372	0.326683	0.540051	0.469434	0.525154	chrII	316968	317864	897	+	NA	NA	nocall	NA	NA	NA
YBR041W	-2.39863	3.79947e-43	3.18979e-42	-3.2268	7.04228e-73	5.40302e-72	-2.62013	4.98467e-35	1.59657e-34	-4.46677	8.65735e-49	4.28482e-48	-0.938994	8.79489e-07	5.13211e-06	-1.52392	5.09591e-16	3.10357e-15	-1.48406	4.73639e-20	1.54359e-19	-2.32574	5.13462e-26	3.88042e-25	chrII	318266	320275	2010	+	NA	NA	TFIID-dominated	NA	NA	TFIID
YBR042C	-1.89782	8.83391e-25	2.55338e-24	-2.82734	2.01904e-48	6.03952e-48	-2.75307	3.31533e-40	1.853e-39	-4.34616	6.27225e-44	2.001e-43	-0.82326	0.000566515	0.00142649	-1.51023	1.55675e-10	4.57237e-10	-2.00051	3.22006e-28	2.26412e-27	-2.75982	1.70784e-20	7.3328e-20	chrII	320416	321609	1194	-	TATA-less	1_mis	TFIID-dominated	TAF1-enriched	NA	TFIID
YBR043C	-2.12433	2.98667e-34	1.49858e-33	-3.02989	1.21521e-64	6.69487e-64	-2.64982	2.09413e-30	4.5795e-30	-4.20272	3.30011e-50	1.91117e-49	-1.11537	9.23417e-07	5.33382e-06	-2.19974	8.51335e-23	1.52983e-21	-2.50389	2.79317e-33	3.4744e-32	-2.82856	2.19748e-26	1.72467e-25	chrII	321876	323945	2070	-	TATA-less	1_mis	TFIID-dominated	TAF1-enriched	NA	TFIID
YBR044C	-2.03887	1.0182e-32	4.65277e-32	-3.20228	8.07079e-71	5.76041e-70	-2.84947	1.2953e-41	8.60156e-41	-4.2896	4.36976e-47	1.83416e-46	-0.89305	0.000557667	0.00140893	-2.23753	2.72342e-17	2.01287e-16	-2.46876	1.5161e-36	2.93232e-35	-3.1355	2.52315e-30	3.04177e-29	chrII	324341	326059	1719	-	NA	NA	TFIID-dominated	NA	NA	TFIID
YBR045C	-1.5066	5.9097e-07	7.94485e-07	-3.67477	9.29334e-30	1.6548e-29	-0.885848	4.01732e-05	4.87942e-05	-2.68043	7.98964e-14	1.07824e-13	0.0370966	0.932149	0.943605	-1.0517	0.0121783	0.0166789	-0.670548	0.0287265	0.0365416	-1.84875	5.75818e-05	8.85937e-05	chrII	328173	330092	1920	-	NA	NA	TFIID-dominated	NA	NA	NA
YBR046C	-3.50451	4.91205e-52	6.30931e-51	-6.27775	2.22619e-121	1.41384e-119	-3.5224	3.65468e-74	1.2256e-71	-5.00773	7.16198e-70	3.80149e-68	-1.43327	6.04552e-08	4.8455e-07	-2.68565	8.58949e-27	2.38067e-25	-2.52942	2.14765e-38	5.18458e-37	-2.7771	4.05029e-23	2.22357e-22	chrII	330507	331511	1005	-	TATA-less	1_mis	TFIID-dominated	TAF1-enriched	NA	CR
YBR048W	-2.8566	1.05911e-58	1.87227e-57	-3.0467	2.61154e-65	1.48775e-64	-3.15823	1.7224e-48	2.82448e-47	-4.21646	1.03544e-41	2.84199e-41	0.273483	0.028503	0.0442864	0.134506	0.279728	0.330509	-0.321238	0.128807	0.156024	-0.361562	0.150478	0.182691	chrII	332831	333812	982	+	TATA-less	2_mis	TFIID-dominated	TAF1-enriched	RPG	CR
YBR049C	-1.57672	6.22699e-25	1.81903e-24	-2.01098	4.87085e-39	1.08931e-38	-2.23908	9.14377e-24	1.43961e-23	-3.74572	9.7227e-49	4.78051e-48	-0.308092	0.0327141	0.0499517	-0.948738	2.97905e-11	9.56132e-11	-1.66105	1.52847e-22	6.03426e-22	-1.89279	6.483e-21	2.90999e-20	chrII	334386	336818	2433	-	TATA-less	2_mis	TFIID-dominated	TAF1-enriched	NA	TFIID
YBR050C	-2.30664	1.42444e-09	2.03207e-09	-3.47568	1.54418e-17	2.23638e-17	-3.01652	9.21141e-29	1.82276e-28	-5.04621	7.19448e-17	9.98722e-17	-1.02512	0.0606531	0.0864645	-2.4747	8.85703e-06	1.55444e-05	-2.66359	5.23634e-10	9.3585e-10	-2.54871	0.000792134	0.00114858	chrII	337183	338199	1017	-	NA	NA	nocall	NA	NA	NA
YBR052C	-2.38481	9.13885e-39	5.90795e-38	-3.76449	1.66389e-87	2.54746e-86	-2.67454	9.69582e-39	4.57313e-38	-4.40076	2.89092e-50	1.68287e-49	-0.643884	4.34607e-05	0.000154816	-1.2869	2.95624e-17	2.17511e-16	-1.12535	2.00132e-11	3.80864e-11	-1.57978	4.04451e-15	1.11725e-14	chrII	338720	339352	633	-	TATA-less	1_mis	TFIID-dominated	TAF1-depleted	NA	TFIID
YBR054W	-3.57129	7.24137e-71	2.06952e-69	-7.02913	1.79705e-197	8.80428e-195	-3.04377	2.57038e-38	1.16483e-37	-4.67121	4.37491e-76	5.46134e-74	-0.881059	4.09065e-07	2.64484e-06	-2.78917	9.79655e-53	5.82538e-50	-2.29041	6.57269e-39	1.69331e-37	-2.73069	1.71097e-42	7.74926e-41	chrII	343101	344135	1035	+	TATA-containing	0_mis	SAGA-dominated	TAF1-depleted	NA	CR
YBR055C	-1.82153	2.12231e-31	9.03594e-31	-2.89952	4.51372e-72	3.38727e-71	-2.71859	8.28445e-35	2.58994e-34	-4.51191	1.48634e-54	1.41118e-53	-0.505918	0.00615403	0.0113894	-1.29007	3.08191e-12	1.11869e-11	-1.71631	2.03178e-25	1.04524e-24	-2.08512	6.34521e-19	2.39073e-18	chrII	344602	347301	2700	-	TATA-containing	0_mis	TFIID-dominated	TAF1-enriched	NA	TFIID
YBR056W	-3.0013	4.01909e-62	8.1559e-61	-5.21782	7.59207e-143	1.00142e-140	-3.3222	4.14047e-66	7.30794e-64	-5.07206	1.95922e-74	1.91408e-72	-0.969333	1.19778e-06	6.65641e-06	-1.67995	9.26146e-18	7.33404e-17	-1.67262	8.08903e-27	4.82382e-26	-2.11409	1.43064e-24	9.15668e-24	chrII	347879	349384	1506	+	TATA-less	2_mis	TFIID-dominated	TAF1-enriched	NA	TFIID
YBR057C	-1.25962	5.56111e-14	9.26716e-14	-1.89109	1.7772e-28	3.08057e-28	-2.27887	2.11733e-26	3.70395e-26	-3.76277	3.41787e-42	9.70507e-42	-0.348127	0.0808191	0.111588	-1.29825	5.71547e-11	1.77516e-10	-2.07916	4.52354e-24	2.04044e-23	-2.57447	1.58382e-19	6.25283e-19	chrII	352193	353293	1101	-	TATA-less	2_mis	TFIID-dominated	TAF1-enriched	NA	TFIID
YBR058C	-1.76094	3.99121e-28	1.40532e-27	-2.59024	6.00888e-57	2.46648e-56	-2.72189	1.1599e-43	9.81013e-43	-4.30541	3.0279e-62	7.16177e-61	-0.379373	0.0204071	0.0329063	-1.24882	1.55651e-14	7.69547e-14	-1.58249	2.7606e-24	1.27163e-23	-1.68988	3.0205e-16	9.09918e-16	chrII	353672	356017	2346	-	TATA-less	3_mis	TFIID-dominated	TAF1-enriched	NA	TFIID
YBR058C-A	-2.13695	2.37724e-21	5.67542e-21	-2.73531	8.80347e-31	1.6055e-30	-2.53011	2.19874e-22	3.32214e-22	-4.14499	1.09931e-32	1.98831e-32	-0.822519	7.46762e-05	0.000248251	-1.12659	4.06138e-08	9.03588e-08	-1.0012	1.79485e-06	2.77288e-06	-1.41341	3.25652e-12	7.43664e-12	chrII	356324	356566	243	-	TATA-less	1_mis	NA	TAF1-enriched	NA	TFIID
YBR059C	-1.66538	1.69312e-28	6.1283e-28	-2.76103	4.70147e-74	3.78935e-73	-2.48924	3.46135e-36	1.24279e-35	-3.97558	5.49644e-48	2.49673e-47	-0.214788	0.126052	0.166071	-0.855149	5.71683e-10	1.56787e-09	-1.66456	1.27838e-19	4.02731e-19	-1.50156	2.20097e-10	4.52118e-10	chrII	356861	360187	3327	-	TATA-less	1_mis	TFIID-dominated	TAF1-enriched	NA	TFIID
YBR060C	-1.63739	3.15225e-23	8.42606e-23	-2.2942	2.39409e-42	5.91323e-42	-2.34885	4.40134e-26	7.58864e-26	-3.85104	2.78473e-37	5.98402e-37	-0.590197	0.00771454	0.013876	-1.44366	4.88733e-11	1.53471e-10	-2.00211	6.75481e-19	2.01778e-18	-2.49984	2.26268e-12	5.21641e-12	chrII	360652	362514	1863	-	TATA-less	1_mis	TFIID-dominated	TAF1-depleted	NA	TFIID
YBR061C	-1.61958	1.28161e-17	2.5355e-17	-1.9505	1.05974e-23	1.67869e-23	-2.52726	1.19536e-34	3.6844e-34	-3.81973	8.76274e-35	1.69643e-34	-0.592976	0.00648757	0.0119259	-1.03471	3.21708e-06	5.88613e-06	-1.92232	1.89007e-17	5.02016e-17	-2.71346	3.61194e-17	1.17492e-16	chrII	364787	365719	933	-	TATA-less	2_mis	TFIID-dominated	TAF1-enriched	NA	TFIID
YBR065C	-1.11277	3.82656e-11	5.70698e-11	-1.69675	9.46573e-23	1.47894e-22	-1.7404	3.49068e-15	4.64339e-15	-2.94452	9.78962e-26	1.51462e-25	-0.198181	0.402998	0.463155	-0.584708	0.0134156	0.0183006	-1.55757	1.06518e-13	2.27633e-13	-1.66874	2.08311e-10	4.28311e-10	chrII	368584	369678	1095	-	TATA-less	1_mis	TFIID-dominated	TAF1-enriched	NA	TFIID
YBR066C	0.280106	0.210081	0.244352	-1.11235	3.70231e-06	4.72449e-06	0.0143077	0.947076	0.959957	-2.53204	4.05386e-11	5.373e-11	1.04981	2.30052e-05	8.83088e-05	0.0140204	0.95741	0.967706	0.382295	0.14819	0.178309	-1.45463	0.000557345	0.000814476	chrII	370037	370699	663	-	TATA-containing	0_mis	TFIID-dominated	TAF1-enriched	NA	CR
YBR067C	-0.707365	1.23123e-06	1.64396e-06	-2.40119	5.50652e-59	2.45255e-58	-1.79911	9.56703e-18	1.31461e-17	-3.61499	8.70292e-26	1.34772e-25	0.809928	9.44771e-11	1.4794e-09	-0.411184	0.000940873	0.00140862	-0.657375	0.0761035	0.0941436	-1.4154	0.00606643	0.0083383	chrII	372103	372735	633	-	TATA-containing	0_mis	TFIID-dominated	TAF1-depleted	NA	TFIID
YBR068C	-2.58837	1.85909e-73	5.93094e-72	-2.57209	2.15442e-72	1.63827e-71	-2.29949	1.8716e-29	3.8541e-29	-3.82524	2.22428e-45	8.03959e-45	-1.71706	4.21198e-34	3.16583e-31	-1.60795	2.25666e-32	1.19039e-30	-2.122	1.36119e-43	6.57202e-42	-3.22258	1.77151e-53	1.67446e-51	chrII	373861	375690	1830	-	TATA-containing	0_mis	SAGA-dominated	TAF1-depleted	NA	CR
YBR069C	-1.71588	1.5161e-26	4.88672e-26	-1.93729	6.18956e-33	1.18521e-32	-1.53735	1.35031e-15	1.80337e-15	-4.11582	4.24956e-54	3.78919e-53	-0.87285	5.92676e-09	6.25443e-08	-1.33248	1.65769e-18	1.47578e-17	-1.37497	3.63026e-17	9.46482e-17	-3.0978	8.65911e-52	7.33438e-50	chrII	376574	378433	1860	-	TATA-containing	0_mis	TFIID-dominated	TAF1-depleted	NA	CR
YBR070C	-3.45293	8.74875e-53	1.18125e-51	-2.9561	2.11974e-38	4.66751e-38	-3.3611	9.72228e-48	1.42339e-46	-4.1059	1.1722e-30	2.0086e-30	-1.82583	6.2673e-09	6.56538e-08	-2.17637	3.08197e-13	1.2759e-12	-2.7431	6.4162e-35	1.0005e-33	-2.72918	4.5415e-20	1.87347e-19	chrII	379221	379934	714	-	TATA-less	2_mis	TFIID-dominated	TAF1-enriched	NA	TFIID
YBR071W	-1.92692	7.45184e-24	2.05932e-23	-1.53159	2.03571e-15	2.86126e-15	-2.3072	3.26341e-26	5.65866e-26	-4.02514	7.77907e-35	1.50946e-34	-0.786097	0.000183252	0.00053751	-0.95196	3.16742e-06	5.7969e-06	-1.51168	4.36669e-05	6.37305e-05	-3.08052	1.92115e-07	3.35019e-07	chrII	380411	381046	636	+	TATA-less	1_mis	SAGA-dominated	TAF1-depleted	NA	CR
YBR072W	0.849068	0.000322433	0.000412837	-3.52173	4.17182e-44	1.08718e-43	-0.647057	0.00385545	0.00455496	-4.46979	4.13809e-67	1.74343e-65	0.745303	4.96612e-05	0.000173009	-1.47726	1.08624e-13	4.80726e-13	-0.318992	0.137311	0.165801	-2.93373	5.62178e-38	1.62236e-36	chrII	382030	382674	645	+	NA	NA	SAGA-dominated	NA	NA	NA
YBR073W	-1.68287	3.74691e-29	1.41287e-28	-1.73508	1.34789e-30	2.45034e-30	-2.17865	1.39341e-23	2.1842e-23	-4.53854	1.79959e-74	1.78397e-72	-0.552331	7.21215e-05	0.000240441	-0.605524	1.03667e-05	1.81065e-05	-1.32559	1.12236e-17	3.04435e-17	-2.33577	1.72326e-28	1.69263e-27	chrII	383112	385988	2877	+	TATA-containing	0_mis	TFIID-dominated	TAF1-enriched	NA	TFIID
YBR074W	-1.76056	2.34462e-33	1.10909e-32	-2.25068	1.12053e-51	3.76567e-51	-2.30363	4.54208e-24	7.22061e-24	-3.62938	2.50024e-42	7.14765e-42	-0.494443	0.0013048	0.0029451	-0.857867	1.63197e-08	3.80019e-08	-1.07767	5.09718e-11	9.50871e-11	-1.14062	8.18857e-08	1.45918e-07	chrII	386286	389216	2931	+	TATA-less	2_mis	TFIID-dominated	TAF1-enriched	NA	TFIID
YBR076W	0.240635	0.701109	0.742345	-0.568739	0.402738	0.437016	-0.763876	0.165941	0.186991	-2.9082	0.0295139	0.03499	0.262543	0.66288	0.708982	1.1228	0.0617085	0.0795183	-0.407803	0.619642	0.677088	-0.597596	0.642957	0.689337	chrII	390227	391291	1065	+	NA	NA	TFIID-dominated	NA	NA	NA
YBR077C	-2.03366	1.42338e-23	3.86805e-23	-2.46542	3.22598e-31	5.94812e-31	-2.54228	4.92151e-32	1.22481e-31	-4.531	1.08045e-41	2.9619e-41	-1.18902	0.00010319	0.000328818	-1.69791	1.61161e-08	3.75412e-08	-2.23806	1.41296e-20	4.78423e-20	-3.24549	2.07417e-22	1.061e-21	chrII	391805	392293	489	-	TATA-less	1_mis	TFIID-dominated	TAF1-depleted	NA	TFIID
YBR078W	-3.20437	1.79114e-84	9.23716e-83	-2.87654	3.26803e-68	2.10869e-67	-2.91114	2.30851e-49	4.21885e-48	-4.16464	9.09154e-62	2.06465e-60	-0.591264	4.48496e-06	2.14032e-05	-0.465461	0.00029503	0.000457948	-0.832745	2.28873e-05	3.37052e-05	-0.659328	0.00101343	0.00145907	chrII	393123	394742	1620	+	TATA-less	2_mis	SAGA-dominated	TAF1-depleted	NA	CR
YBR079C	-1.82237	1.18788e-40	8.56751e-40	-2.21264	9.43286e-59	4.16077e-58	-2.47788	4.42526e-32	1.10418e-31	-3.6681	1.77692e-41	4.80474e-41	-0.048743	0.662709	0.708931	-0.255662	0.021518	0.0288717	-0.473559	0.00348928	0.00465857	-0.408229	0.0366156	0.0475237	chrII	395383	398277	2895	-	TATA-less	1_mis	TFIID-dominated	TAF1-enriched	NA	TFIID
YBR080C	-1.81447	2.04136e-37	1.21966e-36	-2.94569	8.24469e-93	1.65352e-91	-2.61758	2.50325e-40	1.42403e-39	-4.05596	1.35367e-48	6.57428e-48	-0.502506	0.000195881	0.000570104	-1.13934	6.47382e-18	5.24075e-17	-1.27333	4.17427e-15	9.6141e-15	-1.69056	1.77222e-16	5.44437e-16	chrII	398614	400890	2277	-	TATA-less	2_mis	TFIID-dominated	TAF1-enriched	NA	TFIID
YBR081C	-1.15899	3.08258e-18	6.27587e-18	-2.30972	6.22367e-66	3.64544e-65	-2.13204	2.70589e-20	3.88534e-20	-3.75968	5.84703e-50	3.29005e-49	-0.0120718	0.933009	0.944208	-0.699968	8.23452e-07	1.60686e-06	-1.24174	2.06008e-15	4.8162e-15	-1.49819	1.38996e-13	3.46402e-13	chrII	401253	405251	3999	-	TATA-less	2_mis	TFIID-dominated	TAF1-enriched	NA	NA
YBR082C	-2.41247	7.43352e-43	6.15779e-42	-2.78565	4.58239e-56	1.79809e-55	-2.73227	6.93614e-42	4.71813e-41	-3.98742	3.01201e-40	7.51164e-40	-0.341844	0.00330404	0.00665344	-0.927411	6.10179e-16	3.65158e-15	-0.797203	0.000123559	0.000176614	-1.38329	8.77128e-11	1.84954e-10	chrII	406628	407169	542	-	TATA-less	1_mis	TFIID-dominated	TAF1-enriched	NA	TFIID
YBR083W	-2.3244	2.01634e-35	1.07044e-34	-2.56574	5.93914e-42	1.4497e-41	-2.98254	1.23876e-39	6.43562e-39	-3.92871	2.3199e-33	4.28099e-33	-1.51225	2.50266e-11	4.43908e-10	-1.8604	3.49537e-17	2.54885e-16	-2.77663	2.54176e-14	5.60838e-14	-3.5115	1.06622e-07	1.88606e-07	chrII	409169	410629	1461	+	TATA-containing	0_mis	SAGA-dominated	TAF1-depleted	NA	CR
YBR084C-A	-2.8032	7.69911e-65	1.73142e-63	-2.93842	1.54025e-69	1.04703e-68	-2.95298	1.01488e-45	1.11222e-44	-3.65416	4.48187e-43	1.34636e-42	-0.0398912	0.740099	0.77584	0.0892919	0.456347	0.513587	0.0164808	0.923138	0.934467	-0.0864435	0.645169	0.691048	chrII	414186	415261	1076	-	TATA-less	2_mis	TFIID-dominated	TAF1-enriched	RPG	TFIID
YBR084W	-2.08163	5.69329e-36	3.12402e-35	-2.07075	4.23116e-35	8.52821e-35	-2.76605	1.33441e-40	7.84388e-40	-3.92278	2.76743e-53	2.22092e-52	-0.464879	0.000125101	0.000386951	-0.366033	0.00231468	0.0033578	-0.618376	5.02882e-05	7.32629e-05	-0.312833	0.0974007	0.121	chrII	411054	413981	2928	+	TATA-less	2_mis	TFIID-dominated	TAF1-enriched	NA	TFIID
YBR085C-A	-2.41308	5.92873e-36	3.24802e-35	-4.22432	1.81346e-96	4.2022e-95	-2.69791	1.0015e-36	3.79924e-36	-5.26561	7.58203e-65	2.45724e-63	-0.356291	0.0770696	0.106976	-1.6376	5.31206e-17	3.74017e-16	-1.44257	1.28847e-10	2.36171e-10	-2.75059	7.00668e-33	1.13393e-31	chrII	418907	419164	258	-	TATA-containing	0_mis	NA	TAF1-enriched	NA	CR
YBR085W	-1.41203	5.72286e-05	7.43571e-05	-2.57844	2.55321e-12	3.47194e-12	-2.4012	4.47529e-18	6.17482e-18	-3.80166	1.88066e-09	2.45784e-09	-0.681806	0.127222	0.167467	-0.647409	0.13037	0.161996	-1.2421	0.00021248	0.000300162	-2.10668	0.000858243	0.00124195	chrII	415983	416906	924	+	TATA-less	1_mis	SAGA-dominated	TAF1-depleted	NA	TFIID
YBR086C	-2.61419	1.85487e-76	6.95223e-75	-3.34928	9.41061e-122	6.08938e-120	-3.03789	3.78901e-52	9.55372e-51	-4.37525	1.69941e-58	2.64567e-57	-1.27209	2.00669e-18	1.17148e-16	-1.77901	8.73742e-35	6.01595e-33	-2.06501	3.88646e-26	2.16328e-25	-2.6548	1.68389e-27	1.47811e-26	chrII	420201	423041	2841	-	TATA-less	1_mis	TFIID-dominated	TAF1-depleted	NA	TFIID
YBR087W	-1.9229	2.86304e-25	8.57161e-25	-2.30294	3.5485e-34	6.992e-34	-2.60286	1.56644e-41	1.03203e-40	-4.51527	1.9044e-49	1.00982e-48	-0.579089	0.00503036	0.00956903	-1.51475	2.39278e-13	1.00328e-12	-2.11375	2.12799e-31	2.19813e-30	-3.10133	2.58172e-36	6.42672e-35	chrII	423765	424829	1065	+	TATA-less	2_mis	TFIID-dominated	TAF1-enriched	NA	TFIID
YBR088C	-2.28805	2.05023e-38	1.29132e-37	-1.11064	3.9842e-10	5.28785e-10	-2.19925	1.1746e-26	2.07536e-26	-4.86223	8.46823e-60	1.53866e-58	-0.888861	1.81824e-08	1.70829e-07	-0.437556	0.00492333	0.00696895	-1.14546	1.57018e-08	2.64798e-08	-3.02565	1.49414e-26	1.19421e-25	chrII	424990	425766	777	-	TATA-containing	0_mis	SAGA-dominated	TAF1-depleted	NA	CR
YBR089C-A	-3.58692	3.46911e-24	9.73593e-24	-3.23858	1.03556e-18	1.52259e-18	-3.16207	6.16825e-41	3.7885e-40	-4.9442	1.29806e-15	1.78321e-15	-1.8399	2.69637e-06	1.37517e-05	-2.0284	4.12962e-08	9.16899e-08	-1.56146	4.04936e-11	7.59313e-11	-2.35773	6.8586e-08	1.22721e-07	chrII	426190	426489	300	-	NA	NA	NA	NA	NA	TFIID
YBR091C	-1.21392	1.70999e-06	2.28055e-06	-2.37998	6.17351e-19	9.10626e-19	-2.46133	5.67143e-23	8.71837e-23	-4.31891	9.50246e-22	1.39011e-21	-0.752069	0.0316339	0.0484747	-1.23724	0.000333591	0.000515966	-1.81708	6.55415e-08	1.07715e-07	-3.80631	6.26696e-15	1.7066e-14	chrII	427155	427484	330	-	TATA-less	2_mis	TFIID-dominated	TAF1-enriched	NA	TFIID
YBR092C	-2.80648	8.50219e-57	1.36893e-55	-2.26707	8.65388e-37	1.82021e-36	-2.82689	2.23881e-39	1.12815e-38	-4.25904	2.01759e-59	3.46105e-58	-1.13625	1.89477e-14	5.74852e-13	-1.2864	5.71319e-18	4.6596e-17	-1.04089	4.85786e-09	8.35009e-09	-1.38409	1.34894e-12	3.16239e-12	chrII	427698	429101	1404	-	TATA-containing	0_mis	SAGA/TFIID-dominated	TAF1-depleted	NA	CR
YBR093C	-3.79707	1.45043e-73	4.73738e-72	-2.68622	8.92821e-36	1.83349e-35	-2.96706	1.87181e-46	2.27431e-45	-3.99984	2.34438e-39	5.56656e-39	-1.21887	1.90247e-14	5.74852e-13	-0.923451	5.23543e-09	1.28789e-08	-0.757851	1.25623e-06	1.94816e-06	-0.937404	1.60219e-06	2.67661e-06	chrII	429548	430951	1404	-	TATA-containing	0_mis	SAGA/TFIID-dominated	TAF1-depleted	NA	TFIID
YBR094W	-1.61763	1.8246e-25	5.54739e-25	-2.25432	8.38568e-46	2.28516e-45	-2.30613	2.47596e-31	5.79625e-31	-4.00583	4.8109e-50	2.72982e-49	-0.183438	0.286194	0.343147	-0.782513	5.32186e-06	9.53184e-06	-1.05632	1.10863e-11	2.13598e-11	-1.06963	2.78211e-07	4.80406e-07	chrII	432036	434297	2262	+	NA	NA	TFIID-dominated	NA	NA	TFIID
YBR095C	-1.29481	2.24603e-13	3.63424e-13	-2.21418	1.9925e-34	3.95558e-34	-2.475	1.64932e-28	3.21663e-28	-3.55215	4.94631e-39	1.15254e-38	-0.551154	0.0133978	0.0225628	-1.27872	1.29743e-08	3.05929e-08	-2.49129	1.16563e-35	2.01527e-34	-2.46688	1.86679e-19	7.31244e-19	chrII	434406	435698	1293	-	TATA-less	2_mis	TFIID-dominated	TAF1-enriched	NA	TFIID
YBR097W	-1.45832	2.6174e-18	5.34467e-18	-2.71787	1.03875e-57	4.40075e-57	-2.402	1.86271e-28	3.62437e-28	-4.07766	9.87372e-46	3.68542e-45	-0.380338	0.0444031	0.065601	-1.40217	1.22602e-13	5.38213e-13	-1.82351	4.36456e-25	2.18136e-24	-2.47116	1.38438e-24	8.87803e-24	chrII	436951	441315	4365	+	TATA-less	1_mis	nocall	TAF1-enriched	NA	TFIID
YBR098W	-1.79753	1.85762e-21	4.45503e-21	-3.03624	3.47477e-50	1.1158e-49	-2.63622	1.34908e-30	2.98722e-30	-4.36227	2.69676e-38	6.03147e-38	-0.744785	0.00895483	0.015801	-1.40593	1.24319e-06	2.37839e-06	-2.27062	5.11185e-23	2.09159e-22	-2.85999	5.2918e-18	1.84266e-17	chrII	441515	443590	2076	+	NA	NA	TFIID-dominated	NA	NA	TFIID
YBR101C	-1.73304	6.07984e-31	2.5289e-30	-1.93175	7.84787e-38	1.69806e-37	-2.15473	1.488e-25	2.49938e-25	-3.58919	1.95437e-49	1.03248e-48	-0.775734	8.98852e-09	9.03812e-08	-0.714163	4.69168e-08	1.03642e-07	-2.0523	6.79026e-36	1.20487e-34	-3.20669	5.59509e-64	1.17713e-61	chrII	443821	444693	873	-	TATA-less	1_mis	TFIID-dominated	TAF1-enriched	NA	TFIID
YBR102C	-1.20999	1.7206e-17	3.38252e-17	-2.25621	5.63079e-55	2.11857e-54	-2.38553	1.42306e-28	2.7867e-28	-3.65946	1.19432e-44	4.04366e-44	-0.528259	0.00293137	0.00596291	-1.28574	2.03697e-13	8.64062e-13	-1.88538	6.97006e-21	2.43336e-20	-2.46305	2.30701e-19	8.97753e-19	chrII	445062	447323	2262	-	TATA-less	1_mis	SAGA-dominated	TAF1-depleted	NA	TFIID
YBR103W	-1.64409	8.7509e-20	1.93177e-19	-2.52611	2.27242e-41	5.44412e-41	-2.5091	2.01465e-33	5.60442e-33	-3.771	8.17719e-40	1.99286e-39	-0.576444	0.0125832	0.0213616	-1.64284	1.93914e-12	7.20677e-12	-2.03315	1.19589e-28	8.91854e-28	-2.6625	1.0475e-27	9.46228e-27	chrII	447709	449316	1608	+	TATA-less	2_mis	TFIID-dominated	TAF1-enriched	NA	TFIID
YBR104W	-1.59089	7.99718e-11	1.18166e-10	-2.12893	1.99267e-17	2.87983e-17	-2.15792	3.33983e-27	6.07382e-27	-3.52245	9.14207e-34	1.70853e-33	-1.01701	1.27491e-05	5.32734e-05	-1.14326	9.4175e-07	1.8268e-06	-1.90744	2.28564e-24	1.0611e-23	-2.85831	3.65507e-22	1.8295e-21	chrII	449667	450656	990	+	TATA-less	2_mis	TFIID-dominated	TAF1-depleted	NA	TFIID
YBR105C	-3.18595	1.64041e-42	1.3284e-41	-3.26123	1.76729e-43	4.51971e-43	-3.91478	2.84129e-66	5.15042e-64	-4.82393	3.95537e-41	1.04479e-40	-2.0166	2.43747e-13	5.98225e-12	-2.38857	3.40383e-18	2.87654e-17	-2.60289	2.55765e-06	3.92345e-06	-3.00101	5.79858e-06	9.39585e-06	chrII	450881	451969	1089	-	TATA-containing	0_mis	SAGA-dominated	TAF1-depleted	NA	TFIID
YBR106W	-2.64523	9.42537e-58	1.58065e-56	-2.45186	1.6506e-49	5.15784e-49	-2.85344	9.96746e-49	1.68818e-47	-4.42386	2.19106e-61	4.71882e-60	-0.610541	6.01348e-07	3.65982e-06	-0.655287	5.7266e-08	1.25235e-07	-0.406432	0.0101066	0.0131961	-0.499407	0.00448222	0.00621186	chrII	452658	453224	567	+	TATA-less	1_mis	TFIID-dominated	TAF1-enriched	NA	TFIID
YBR107C	-1.68936	8.26383e-14	1.36188e-13	-2.92938	3.19975e-34	6.31207e-34	-2.74174	3.76223e-34	1.11307e-33	-3.93237	2.26201e-30	3.85347e-30	-0.409094	0.222447	0.274713	-1.61402	1.12697e-06	2.16554e-06	-2.14218	1.00769e-14	2.26566e-14	-2.84338	6.23576e-14	1.58866e-13	chrII	453793	454530	738	-	TATA-less	2_mis	TFIID-dominated	TAF1-enriched	NA	TFIID
YBR108W	-2.12198	1.48099e-37	8.92625e-37	-3.32692	1.77729e-83	2.19647e-82	-2.92317	1.01586e-35	3.46208e-35	-3.82622	8.21898e-31	1.41265e-30	-0.511096	0.0239693	0.0379083	-1.64368	6.1519e-14	2.82185e-13	-1.66419	3.75602e-06	5.72138e-06	-2.32583	1.60351e-05	2.54641e-05	chrII	454822	457665	2844	+	TATA-less	1_mis	TFIID-dominated	TAF1-enriched	NA	TFIID
YBR109C	-1.81969	2.12991e-24	6.05182e-24	-2.06609	1.89374e-30	3.43175e-30	-2.12655	2.30411e-26	4.02334e-26	-3.31815	2.77195e-32	4.95248e-32	0.0728138	0.576358	0.628745	-0.40678	0.00157534	0.0023161	-0.378209	0.0182067	0.0234343	-0.60286	0.000669547	0.00097386	chrII	457919	458362	444	-	TATA-less	2_mis	TFIID-dominated	TAF1-enriched	NA	TFIID
YBR110W	-2.03871	1.79873e-34	9.1361e-34	-3.20596	2.26628e-75	1.90729e-74	-2.98554	1.38898e-43	1.16158e-42	-4.26416	4.51304e-44	1.45562e-43	-0.95876	9.9043e-06	4.26915e-05	-1.90123	2.12762e-18	1.84572e-17	-1.92662	4.79744e-23	1.96789e-22	-2.48845	9.97426e-20	4.00814e-19	chrII	458872	460221	1350	+	TATA-less	2_mis	TFIID-dominated	TAF1-enriched	NA	TFIID
YBR111C	-2.28122	1.55411e-37	9.35877e-37	-3.56922	1.71385e-76	1.53064e-75	-2.77736	2.24516e-42	1.59855e-41	-4.03913	3.34489e-37	7.16944e-37	-0.537655	0.000413638	0.00108849	-0.953193	1.47114e-10	4.32759e-10	-0.657399	0.00015313	0.00021798	-0.648077	0.00243536	0.00342084	chrII	461178	461873	696	-	TATA-containing	0_mis	TFIID-dominated	TAF1-depleted	NA	TFIID
YBR111W-A	-1.52511	3.64967e-09	5.15296e-09	-2.6575	1.5928e-22	2.48296e-22	-2.49897	1.1412e-21	1.69413e-21	-4.49595	2.61354e-25	4.01592e-25	-0.486305	0.0743203	0.103614	-1.72696	3.27588e-10	9.22012e-10	-1.85677	3.28508e-10	5.9215e-10	-2.48613	1.89262e-12	4.38496e-12	chrII	462139	462579	441	+	TATA-less	1_mis	NA	TAF1-enriched	NA	TFIID
YBR112C	-2.08345	5.37748e-40	3.73321e-39	-2.72599	4.36497e-66	2.57432e-65	-3.41405	1.76724e-51	4.2181e-50	-3.88039	8.88067e-28	1.42569e-27	-0.889067	1.28302e-08	1.23833e-07	-1.5447	5.20867e-23	9.62427e-22	-2.61139	4.282e-19	1.29573e-18	-2.33381	1.56573e-08	2.88304e-08	chrII	462870	465770	2901	-	TATA-less	1_mis	TFIID-dominated	TAF1-enriched	NA	TFIID
YBR114W	-1.69878	1.12977e-21	2.74694e-21	-2.43091	1.9966e-40	4.65015e-40	-2.99997	2.23857e-48	3.59188e-47	-4.37935	3.09762e-51	2.01944e-50	-1.13698	6.94849e-07	4.15321e-06	-1.35043	3.54246e-09	8.85074e-09	-2.75059	4.45006e-28	3.05321e-27	-2.47766	7.81102e-10	1.5579e-09	chrII	467248	469620	2373	+	TATA-containing	0_mis	TFIID-dominated	TAF1-enriched	NA	TFIID
YBR117C	-1.93291	0.00332102	0.00416356	-3.64943	1.85882e-06	2.38e-06	-3.35535	1.69218e-12	2.19271e-12	-5.52746	0.000198099	0.000246336	-1.28009	0.0191539	0.0310521	-0.541542	0.322923	0.376849	-1.17104	0.131904	0.159567	-1.3947	0.26475	0.311623	chrII	474392	476437	2046	-	NA	NA	SAGA-dominated	NA	NA	NA
YBR118W	-2.84401	9.3007e-66	2.17725e-64	-1.96451	2.69347e-32	5.07542e-32	-2.0336	1.13496e-25	1.91598e-25	-3.70256	2.40735e-50	1.41359e-49	0.0670864	0.595737	0.647067	-0.116864	0.355035	0.410298	-0.0448738	0.779829	0.817585	-0.206609	0.259032	0.305057	chrII	477671	479047	1377	+	TATA-containing	0_mis	SAGA-dominated	TAF1-depleted	NA	CR
YBR119W	-2.26058	2.92656e-22	7.35285e-22	-3.25544	8.69905e-40	1.9836e-39	-2.89483	2.24028e-30	4.89113e-30	-4.26225	8.40947e-19	1.18794e-18	-0.896943	0.00348748	0.00695069	-1.86394	8.85638e-10	2.37222e-09	-2.07171	1.24957e-07	2.02554e-07	-1.5886	0.0307794	0.0401487	chrII	479338	480323	986	+	TATA-less	2_mis	TFIID-dominated	TAF1-enriched	NA	TFIID
YBR120C	-1.83925	7.82829e-16	1.41711e-15	-3.34841	1.5059e-41	3.63057e-41	-2.72137	2.39752e-31	5.6185e-31	-5.13147	1.34241e-36	2.78694e-36	-1.19145	0.000515876	0.00131942	-2.05369	1.36259e-09	3.54946e-09	-2.60107	1.78438e-15	4.18368e-15	-4.60484	3.81682e-18	1.3485e-17	chrII	480435	480923	489	-	TATA-less	1_mis	TFIID-dominated	TAF1-enriched	NA	TFIID
YBR121C	-2.11832	2.872e-58	5.02527e-57	-2.63178	1.47651e-87	2.26563e-86	-2.47651	3.37737e-31	7.81105e-31	-3.59252	3.61149e-46	1.40236e-45	0.0370273	0.737269	0.773547	-0.180774	0.099607	0.125463	-0.125004	0.40257	0.459375	-0.0395003	0.838779	0.857716	chrII	481364	483367	2004	-	TATA-less	1_mis	TFIID-dominated	TAF1-enriched	NA	TFIID
YBR122C	-1.6852	1.41878e-26	4.5838e-26	-2.55106	4.16722e-56	1.63799e-55	-2.40409	7.79548e-33	2.06903e-32	-3.88166	2.85359e-41	7.61521e-41	-0.900058	4.36027e-06	2.08911e-05	-1.85472	9.4563e-22	1.42849e-20	-2.15613	4.04848e-37	8.41776e-36	-3.14573	6.99844e-39	2.23744e-37	chrII	483970	484503	534	-	TATA-less	2_mis	TFIID-dominated	TAF1-enriched	NA	TFIID
YBR123C	-1.99436	2.40231e-36	1.35394e-35	-3.20074	1.28834e-83	1.60086e-82	-2.76994	8.5239e-39	4.04312e-38	-4.50658	1.59783e-49	8.52809e-49	-1.33198	1.4855e-08	1.41558e-07	-2.0983	4.6516e-20	5.35671e-19	-2.60665	5.16289e-29	3.99664e-28	-3.36862	2.22561e-18	8.02401e-18	chrII	484742	486691	1950	-	TATA-less	1_mis	TFIID-dominated	TAF1-enriched	NA	TFIID
YBR125C	-1.20351	3.95537e-12	6.12413e-12	-2.24026	6.30137e-37	1.32988e-36	-2.19733	3.36733e-26	5.83281e-26	-3.56976	1.36346e-30	2.33336e-30	-0.360256	0.0771079	0.107004	-1.29619	1.83031e-10	5.31856e-10	-1.93065	4.06702e-18	1.14164e-17	-2.6785	1.14337e-22	5.95612e-22	chrII	487199	488380	1182	-	TATA-containing	0_mis	TFIID-dominated	TAF1-depleted	NA	TFIID
YBR126C	-2.47607	6.87397e-50	8.11507e-49	-3.91052	2.34276e-118	1.33908e-116	-2.75156	7.5786e-47	9.71887e-46	-4.55362	1.04161e-65	3.67616e-64	-0.531079	0.000102307	0.000326871	-1.72796	1.65373e-37	1.46176e-35	-1.66292	1.11619e-21	4.1502e-21	-2.46041	6.28275e-34	1.16741e-32	chrII	488905	490392	1488	-	TATA-containing	0_mis	SAGA-dominated	TAF1-depleted	NA	CR
YBR126W-A	-3.02953	9.24398e-05	0.000119563	-3.50885	1.00162e-05	1.27154e-05	-1.29646	0.238077	0.265246	-4.36685	3.05766e-05	3.84116e-05	-0.108858	0.810061	0.836108	-0.901605	0.0414102	0.0542705	-1.08208	0.215494	0.254501	-0.39473	0.39052	0.444652	chrII	490850	491056	207	+	TATA-less	1_mis	NA	TAF1-enriched	NA	NA
YBR127C	-1.9948	1.92567e-44	1.73791e-43	-2.05491	1.24433e-46	3.49645e-46	-2.2308	2.20535e-28	4.27247e-28	-3.38585	5.96847e-40	1.46962e-39	0.107801	0.31895	0.376935	-0.122592	0.255165	0.303516	-0.114844	0.464358	0.521753	-0.136998	0.447184	0.502851	chrII	491269	492822	1554	-	TATA-less	2_mis	TFIID-dominated	TAF1-enriched	NA	TFIID
YBR128C	-2.45403	2.18351e-14	3.68975e-14	-4.79007	1.63351e-32	3.09424e-32	-2.7484	4.73257e-28	9.0072e-28	-4.81581	6.83531e-27	1.07959e-26	-1.05832	0.038501	0.0579491	-2.4319	1.84204e-06	3.4633e-06	-2.70881	9.68295e-15	2.17783e-14	-4.47177	5.82829e-13	1.39699e-12	chrII	493081	494115	1035	-	NA	NA	nocall	NA	NA	TFIID
YBR129C	-1.51362	2.15526e-12	3.36971e-12	-2.39527	1.57562e-27	2.66384e-27	-2.19551	6.10884e-26	1.04654e-25	-4.10038	4.81769e-45	1.68357e-44	-0.585491	0.0228449	0.0363595	-1.61021	4.11836e-10	1.14242e-09	-1.77829	6.97843e-20	2.25287e-19	-2.9567	3.0461e-26	2.34277e-25	chrII	494353	495339	987	-	TATA-less	3_mis	TFIID-dominated	TAF1-enriched	NA	TFIID
YBR130C	-1.39236	7.20304e-15	1.24604e-14	-2.36868	2.64905e-39	5.97692e-39	-2.54332	5.18205e-32	1.28678e-31	-3.82152	1.28118e-39	3.08774e-39	-0.655538	0.000706323	0.00173537	-1.26699	3.59347e-11	1.14435e-10	-2.33413	2.98708e-21	1.07095e-20	-3.11596	1.65913e-15	4.71291e-15	chrII	495592	496869	1278	-	TATA-less	3_mis	TFIID-dominated	TAF1-enriched	NA	TFIID
YBR131W	-1.14833	2.97835e-11	4.46134e-11	-2.33556	4.47847e-39	1.00319e-38	-2.21479	2.96026e-28	5.69385e-28	-3.36927	1.42227e-30	2.43277e-30	-0.240198	0.349592	0.408809	-0.908083	0.000349278	0.000539591	-1.51076	1.48169e-06	2.29344e-06	-0.828263	0.0875513	0.109263	chrII	497163	499277	2115	+	TATA-less	1_mis	TFIID-dominated	TAF1-enriched	NA	TFIID
YBR132C	-2.14487	3.79883e-45	3.56446e-44	-3.11488	1.34026e-90	2.4065e-89	-2.51124	2.0837e-38	9.51352e-38	-4.30047	5.10143e-54	4.48939e-53	-0.910802	2.57527e-05	9.77595e-05	-1.97724	3.53358e-21	4.85571e-20	-2.09559	3.14185e-24	1.44013e-23	-2.89476	1.32631e-21	6.36043e-21	chrII	499652	501442	1791	-	TATA-containing	0_mis	SAGA-dominated	TAF1-depleted	NA	CR
YBR133C	-1.11242	6.69519e-11	9.92057e-11	-1.69766	4.8815e-23	7.66007e-23	-1.70366	1.891e-16	2.55241e-16	-3.18304	4.59364e-27	7.27579e-27	-0.611323	0.000652914	0.0016143	-1.02843	4.23342e-09	1.0477e-08	-1.45901	6.32307e-16	1.52249e-15	-2.11136	3.34016e-22	1.6809e-21	chrII	501804	504287	2484	-	TATA-containing	0_mis	TFIID-dominated	TAF1-enriched	NA	TFIID
YBR135W	-2.08282	2.47836e-21	5.91068e-21	-2.03917	2.09963e-19	3.12801e-19	-2.36692	6.22591e-23	9.55542e-23	-3.8037	2.47101e-27	3.92762e-27	-0.754654	0.000577904	0.0014491	-0.937418	1.34861e-05	2.32567e-05	-1.20712	7.05917e-08	1.15753e-07	-1.15459	1.12154e-05	1.79767e-05	chrII	504854	505306	453	+	TATA-containing	0_mis	TFIID-dominated	TAF1-enriched	NA	TFIID
YBR136W	-1.53075	4.81813e-23	1.27498e-22	-2.41285	2.43283e-53	8.7274e-53	-2.37101	1.4422e-27	2.67428e-27	-3.63107	6.50605e-42	1.81004e-41	-0.274584	0.076333	0.106125	-0.629737	4.30433e-05	7.11874e-05	-1.6783	3.60247e-18	1.01605e-17	-1.48311	7.89587e-11	1.66873e-10	chrII	505668	512774	7107	+	TATA-less	1_mis	TFIID-dominated	TAF1-enriched	NA	TFIID
YBR137W	-2.98384	3.89089e-47	4.03136e-46	-4.00805	8.57507e-66	4.98444e-65	-3.20221	1.09342e-44	1.07726e-43	-4.56155	3.79383e-31	6.56085e-31	-1.28584	2.09122e-07	1.46556e-06	-2.23526	9.33791e-20	1.03349e-18	-1.79476	2.85727e-19	8.75998e-19	-2.14321	2.57015e-16	7.78927e-16	chrII	513044	513583	540	+	TATA-less	1_mis	TFIID-dominated	TAF1-depleted	NA	TFIID
YBR139W	-2.69296	7.13151e-48	7.67897e-47	-3.98214	6.11578e-97	1.45653e-95	-2.63228	5.61057e-39	2.72682e-38	-3.80529	8.01823e-41	2.08208e-40	-0.766489	7.61693e-06	3.42051e-05	-1.41924	2.32914e-17	1.74312e-16	-1.32126	3.75043e-11	7.04882e-11	-1.78529	3.48937e-14	9.08128e-14	chrII	515664	517190	1527	+	TATA-containing	0_mis	SAGA-dominated	TAF1-depleted	NA	CR
YBR140C	-1.22205	8.89697e-16	1.60506e-15	-1.88144	4.1698e-35	8.40948e-35	-1.83653	9.45877e-19	1.31673e-18	-3.34899	1.26507e-36	2.63123e-36	-0.0828528	0.519254	0.575534	-0.364425	0.00430007	0.00611053	-1.05378	1.11765e-11	2.1521e-11	-1.23646	3.10295e-10	6.33212e-10	chrII	517350	526628	9279	-	NA	NA	TFIID-dominated	NA	NA	TFIID
YBR141C	-1.53345	1.42779e-12	2.24615e-12	-1.53754	5.71196e-12	7.74275e-12	-2.20939	2.48293e-23	3.8638e-23	-3.06413	1.91516e-18	2.68736e-18	-0.644166	0.021554	0.0344967	-0.549798	0.052945	0.0686312	-2.09626	6.97038e-16	1.67279e-15	-2.62262	8.18516e-10	1.63053e-09	chrII	527025	528038	1014	-	NA	NA	nocall	NA	NA	TFIID
YBR142W	-1.58147	2.64259e-22	6.66136e-22	-1.75245	2.17988e-26	3.60633e-26	-2.54012	1.08597e-31	2.61623e-31	-3.71124	1.45746e-42	4.23662e-42	-0.79557	5.17459e-07	3.23439e-06	-0.796363	6.16838e-07	1.22006e-06	-1.86885	7.54742e-33	8.96067e-32	-1.86633	3.44553e-15	9.56652e-15	chrII	528317	530638	2322	+	TATA-less	1_mis	TFIID-dominated	TAF1-enriched	NA	TFIID
YBR143C	-2.10554	1.03729e-55	1.58812e-54	-2.87553	2.12768e-100	5.90842e-99	-2.6092	2.23658e-37	9.10792e-37	-3.85999	7.6393e-51	4.75499e-50	-0.628984	1.31147e-06	7.22809e-06	-1.1179	6.15265e-18	4.99932e-17	-1.09369	1.2624e-12	2.54668e-12	-1.27994	5.1711e-10	1.04124e-09	chrII	530869	532182	1314	-	TATA-less	2_mis	TFIID-dominated	TAF1-enriched	NA	TFIID
YBR145W	-2.42669	2.10481e-25	6.36267e-25	-3.35767	1.4355e-44	3.78406e-44	-2.88464	5.0945e-44	4.58642e-43	-4.67232	2.71708e-37	5.84238e-37	-1.26881	0.000222537	0.000637804	-2.12238	3.64417e-11	1.1588e-10	-2.39112	4.7692e-27	2.92708e-26	-2.78357	1.93853e-15	5.47794e-15	chrII	533762	534817	1056	+	TATA-containing	0_mis	SAGA-dominated	TAF1-depleted	NA	CR
YBR146W	-1.7617	3.08116e-27	1.02991e-26	-2.32877	4.99828e-45	1.33502e-44	-2.46674	3.06952e-36	1.10863e-35	-4.06392	6.76815e-51	4.2441e-50	-0.84566	2.21563e-05	8.56758e-05	-1.87115	1.33849e-20	1.68367e-19	-2.34966	3.00329e-26	1.70518e-25	-3.25561	1.42774e-33	2.50315e-32	chrII	535260	536096	837	+	TATA-less	1_mis	TFIID-dominated	TAF1-enriched	NA	TFIID
YBR147W	-1.71718	7.51105e-05	9.73512e-05	-3.18759	1.17458e-11	1.58905e-11	-2.5119	1.66013e-14	2.19529e-14	-2.48445	2.86915e-05	3.60838e-05	-0.473997	0.402406	0.46274	-1.0888	0.0494046	0.0642456	-2.81883	1.81385e-06	2.80092e-06	-0.351921	0.678214	0.723236	chrII	536575	537465	891	+	NA	NA	SAGA-dominated	NA	NA	NA
YBR148W	-1.29187	0.0109667	0.013568	-1.28851	0.0235484	0.0279782	-1.76493	4.36959e-08	5.48304e-08	-0.811837	0.278127	0.31051	-0.302504	0.571366	0.624319	0.140325	0.794831	0.829053	-1.45168	0.0012535	0.00171142	0.478567	0.536238	0.589433	chrII	537876	539705	1830	+	NA	NA	nocall	NA	NA	NA
YBR149W	-2.49248	7.11797e-53	9.64865e-52	-3.30909	3.31782e-88	5.23148e-87	-2.41426	9.87653e-36	3.36937e-35	-4.37786	4.72441e-56	5.31673e-55	-0.437549	0.000615077	0.00152955	-0.881934	2.46161e-12	9.05081e-12	-0.912788	3.3785e-08	5.61761e-08	-1.1931	2.41194e-09	4.66233e-09	chrII	539987	541021	1035	+	TATA-containing	0_mis	SAGA-dominated	TAF1-depleted	NA	CR
YBR150C	-1.37115	4.83578e-19	1.02626e-18	-2.37859	2.03486e-53	7.3112e-53	-2.00867	4.71238e-19	6.60521e-19	-3.7212	1.54403e-41	4.18845e-41	-0.776645	0.00021194	0.000612101	-1.46022	3.33494e-13	1.3728e-12	-1.73593	3.77011e-26	2.1039e-25	-2.70934	3.93325e-28	3.73945e-27	chrII	541209	544493	3285	-	TATA-less	2_mis	TFIID-dominated	TAF1-enriched	NA	TFIID
YBR151W	-2.13684	4.19658e-40	2.94318e-39	-3.31687	1.87125e-85	2.55675e-84	-2.83162	1.67884e-41	1.09853e-40	-4.33738	3.17073e-46	1.23907e-45	-0.744335	9.86669e-05	0.000317241	-1.41897	3.19793e-14	1.51687e-13	-1.31103	1.03445e-15	2.45006e-15	-1.92216	1.55749e-17	5.23557e-17	chrII	545028	545978	951	+	TATA-less	1_mis	TFIID-dominated	TAF1-enriched	NA	TFIID
YBR152W	-2.06481	4.37431e-19	9.29473e-19	-2.83967	9.54129e-32	1.7774e-31	-2.93674	3.63004e-32	9.10497e-32	-4.2831	7.78385e-32	1.37143e-31	-1.16902	0.000407434	0.00107358	-1.94004	6.77692e-09	1.64787e-08	-2.61949	1.11974e-13	2.38902e-13	-2.87344	8.11771e-08	1.44734e-07	chrII	546376	547251	876	+	TATA-less	2_mis	TFIID-dominated	TAF1-enriched	NA	TFIID
YBR153W	-1.47215	6.07469e-14	1.00936e-13	-2.58886	1.26031e-37	2.71157e-37	-2.68424	1.37719e-31	3.29181e-31	-4.1547	1.3935e-39	3.35126e-39	-0.829336	0.00166889	0.00366644	-1.60386	1.11916e-09	2.95893e-09	-2.63063	2.14867e-27	1.37304e-26	-2.83645	6.23921e-17	1.98305e-16	chrII	547460	548194	735	+	TATA-less	2_mis	TFIID-dominated	TAF1-enriched	NA	TFIID
YBR154C	-1.81345	2.98444e-25	8.91562e-25	-2.01715	2.46243e-30	4.44703e-30	-2.34118	1.44783e-28	2.83273e-28	-4.03696	2.75673e-54	2.50109e-53	-0.58709	0.000147834	0.000448047	-1.01827	3.62263e-11	1.15307e-10	-1.45423	1.38474e-18	4.04016e-18	-2.1828	1.18974e-23	6.87289e-23	chrII	548362	549009	648	-	TATA-containing	0_mis	TFIID-dominated	TAF1-depleted	NA	TFIID
YBR155W	-1.65924	2.27174e-19	4.90304e-19	-2.53952	4.76254e-40	1.09508e-39	-2.62168	5.79163e-29	1.16057e-28	-3.17993	6.3503e-26	9.85664e-26	-1.07258	4.01954e-07	2.61292e-06	-1.53415	4.91488e-13	1.97592e-12	-2.11087	2.39623e-20	8.02189e-20	-2.42803	2.74783e-10	5.61974e-10	chrII	549771	550928	1158	+	NA	NA	TFIID-dominated	NA	NA	TFIID
YBR156C	-1.37055	2.11171e-13	3.42416e-13	-2.29644	6.96086e-33	1.33067e-32	-2.01001	2.398e-17	3.27831e-17	-3.59226	1.49231e-29	2.48571e-29	0.0727625	0.741571	0.776863	-1.41463	5.90592e-10	1.61634e-09	-0.846506	0.00289886	0.00388461	-1.95087	1.91637e-06	3.18841e-06	chrII	551104	553200	2097	-	TATA-less	1_mis	TFIID-dominated	TAF1-enriched	NA	TFIID
YBR157C	-1.04549	4.30836e-10	6.25154e-10	-0.888269	8.59128e-07	1.10289e-06	-0.764475	0.000333609	0.000400199	-3.27363	9.63925e-26	1.49169e-25	-0.403889	0.0907762	0.123576	-0.514863	0.0438021	0.0573249	-0.440263	0.0478048	0.0600716	-2.18931	2.68763e-11	5.84291e-11	chrII	553543	554310	768	-	TATA-containing	0_mis	SAGA-dominated	TAF1-depleted	NA	CR
YBR158W	-2.96028	5.13399e-66	1.21848e-64	-2.48409	7.0804e-47	2.00431e-46	-2.678	3.67373e-34	1.08737e-33	-3.83113	9.49643e-48	4.20601e-47	-1.85587	5.32074e-26	1.14263e-23	-1.8077	1.86829e-25	4.73663e-24	-1.93542	9.6806e-28	6.4716e-27	-1.85636	2.75954e-18	9.85543e-18	chrII	556549	558198	1650	+	TATA-containing	0_mis	SAGA-dominated	TAF1-depleted	NA	CR
YBR159W	-1.93629	4.09402e-33	1.91287e-32	-3.14495	2.06507e-77	1.91409e-76	-2.31581	6.1671e-29	1.23471e-28	-3.96984	1.80731e-43	5.57834e-43	-0.507472	0.00088959	0.00211427	-0.944367	2.85447e-10	8.09323e-10	-0.711369	3.79468e-06	5.77772e-06	-0.978924	5.50805e-06	8.93175e-06	chrII	558685	559728	1044	+	TATA-less	1_mis	TFIID-dominated	TAF1-enriched	NA	TFIID
YBR160W	-1.83978	1.11031e-28	4.066e-28	-2.67855	2.50273e-55	9.54739e-55	-2.78416	5.95512e-43	4.62285e-42	-4.37226	2.67638e-56	3.09459e-55	-0.891418	4.26417e-05	0.000152169	-1.65916	3.6413e-14	1.71351e-13	-2.31155	6.4258e-33	7.69915e-32	-3.58442	1.08087e-38	3.38915e-37	chrII	560078	560974	897	+	TATA-less	2_mis	TFIID-dominated	TAF1-enriched	NA	TFIID
YBR161W	-1.73642	4.25343e-20	9.52162e-20	-2.18808	1.74195e-27	2.94286e-27	-2.3455	3.54878e-20	5.07282e-20	-4.01145	7.69107e-31	1.32293e-30	-0.69152	0.0126772	0.021497	-1.05802	0.000177357	0.000279204	-1.81671	1.64769e-08	2.77295e-08	-2.40204	1.4199e-07	2.49477e-07	chrII	561634	562764	1131	+	TATA-less	2_mis	TFIID-dominated	TAF1-enriched	NA	TFIID
YBR162C	-2.84866	1.88535e-70	5.23548e-69	-3.08855	3.10102e-81	3.38155e-80	-2.92262	3.15161e-48	4.96194e-47	-3.73946	6.84925e-45	2.36289e-44	-0.478656	0.000122986	0.000381193	-0.204841	0.0967271	0.122165	-0.63344	0.00117173	0.00160145	-0.389798	0.0718941	0.0907125	chrII	563203	564570	1368	-	TATA-less	1_mis	TFIID-dominated	TAF1-depleted	NA	CR
YBR162W-A	-3.07165	2.43023e-45	2.29916e-44	-3.43014	2.20973e-47	6.38169e-47	-2.66644	2.14987e-22	3.25196e-22	-3.79772	4.9612e-24	7.47674e-24	-1.1569	3.19323e-09	3.60919e-08	-1.03593	4.26655e-08	9.46016e-08	-1.17178	1.2812e-07	2.07475e-07	-1.18349	1.92623e-07	3.35815e-07	chrII	565231	565428	198	+	TATA-less	1_mis	TFIID-dominated	TAF1-enriched	NA	TFIID
YBR163W	-1.70719	4.19366e-22	1.04674e-21	-2.25727	6.12188e-35	1.22957e-34	-2.27866	8.14874e-24	1.28536e-23	-3.31158	1.32181e-28	2.16113e-28	-0.617321	0.0101271	0.0176147	-0.946147	8.42182e-05	0.000136287	-1.37142	1.64824e-11	3.14406e-11	-1.22227	5.06562e-06	8.22864e-06	chrII	565723	567480	1758	+	TATA-less	2_mis	TFIID-dominated	TAF1-enriched	NA	TFIID
YBR164C	-1.98626	4.84232e-27	1.60297e-26	-3.2417	8.76142e-63	4.42849e-62	-2.39393	1.82955e-29	3.76868e-29	-3.83142	7.55445e-40	1.84978e-39	-1.19644	3.20987e-09	3.62119e-08	-1.30182	1.1081e-11	3.74577e-11	-1.47817	1.68484e-16	4.22053e-16	-2.02771	2.58735e-17	8.48827e-17	chrII	567875	568426	552	-	TATA-containing	0_mis	TFIID-dominated	TAF1-depleted	NA	TFIID
YBR165W	-1.59365	6.67576e-14	1.10682e-13	-2.24255	3.53543e-25	5.73818e-25	-2.37079	3.22564e-32	8.13017e-32	-4.0114	2.30501e-40	5.7913e-40	-0.815749	0.00707559	0.0128536	-1.45247	1.30911e-06	2.50085e-06	-2.3305	5.86685e-29	4.52011e-28	-3.01075	7.86521e-24	4.61718e-23	chrII	568852	569685	834	+	TATA-less	1_mis	TFIID-dominated	TAF1-enriched	NA	TFIID
YBR166C	-1.46156	3.07321e-17	5.95119e-17	-2.43711	4.30712e-43	1.09013e-42	-2.10199	1.18054e-23	1.85561e-23	-3.69611	8.05879e-35	1.56149e-34	-0.644942	0.000808795	0.00194999	-0.964593	2.16817e-07	4.47523e-07	-1.6445	1.1894e-20	4.05465e-20	-2.29092	1.28523e-20	5.5659e-20	chrII	569842	571200	1359	-	NA	NA	TFIID-dominated	NA	NA	TFIID
YBR167C	-2.22577	2.98109e-16	5.49511e-16	-3.49426	2.80407e-30	5.06135e-30	-2.97504	5.27167e-31	1.20058e-30	-3.85511	4.69254e-17	6.52215e-17	-1.06119	0.00639318	0.0117771	-1.7338	8.08191e-06	1.42298e-05	-2.76093	5.41646e-14	1.17486e-13	-2.8013	6.98745e-07	1.18801e-06	chrII	571468	571890	423	-	NA	NA	TFIID-dominated	NA	NA	TFIID
YBR168W	-1.93081	8.88355e-23	2.30804e-22	-3.28514	7.22823e-55	2.71365e-54	-2.98479	1.06149e-41	7.11233e-41	-4.57921	3.5529e-42	1.00673e-41	-0.978778	0.00220521	0.00466079	-1.97714	7.07425e-10	1.91288e-09	-2.18061	5.74763e-20	1.86755e-19	-2.33975	3.36126e-13	8.17684e-13	chrII	572371	573612	1242	+	TATA-less	2_mis	TFIID-dominated	TAF1-enriched	NA	TFIID
YBR169C	-2.89287	6.65064e-82	2.96213e-80	-4.3918	1.88619e-182	6.80914e-180	-3.16044	1.40479e-55	5.67586e-54	-4.55641	1.96884e-75	2.14064e-73	-0.933803	1.21098e-08	1.18017e-07	-2.16679	1.80244e-42	2.56299e-40	-2.44042	1.44182e-53	1.95787e-51	-3.03094	5.54968e-50	4.25824e-48	chrII	573915	575996	2082	-	NA	NA	SAGA-dominated	NA	NA	TFIID
YBR170C	-0.974858	6.0223e-10	8.69437e-10	-3.21678	2.93743e-90	5.08783e-89	-2.47535	2.89627e-35	9.47113e-35	-3.90652	1.85248e-51	1.23273e-50	-0.179718	0.290485	0.347808	-1.38775	2.24522e-17	1.68804e-16	-2.12328	1.42457e-36	2.77175e-35	-2.73302	1.45219e-29	1.58646e-28	chrII	576344	578086	1743	-	TATA-less	3_mis	TFIID-dominated	TAF1-enriched	NA	TFIID
YBR171W	-1.76559	1.02713e-19	2.25948e-19	-2.62792	8.20993e-40	1.87332e-39	-2.48223	1.74135e-30	3.83051e-30	-3.93596	2.00875e-38	4.51969e-38	-0.46223	0.0219508	0.0350758	-0.972898	1.07328e-06	2.06968e-06	-1.27525	3.71753e-13	7.69967e-13	-1.7175	2.42434e-15	6.80067e-15	chrII	578364	578984	621	+	NA	NA	TFIID-dominated	NA	NA	TFIID
YBR172C	-1.46697	9.55891e-21	2.21427e-20	-2.04048	3.69584e-38	8.07317e-38	-2.21319	1.0534e-26	1.86505e-26	-3.3607	1.33635e-35	2.66362e-35	-0.956773	1.2803e-09	1.54899e-08	-1.41113	1.60552e-19	1.71037e-18	-1.82098	7.91741e-22	2.97611e-21	-2.26343	8.94372e-21	3.93596e-20	chrII	579150	581372	2223	-	TATA-less	1_mis	TFIID-dominated	TAF1-enriched	NA	TFIID
YBR173C	-1.80029	1.16991e-18	2.43235e-18	-2.85892	3.68333e-43	9.33972e-43	-2.75088	1.17311e-35	3.97175e-35	-4.21509	1.11598e-40	2.86474e-40	-0.685168	0.000269287	0.000748601	-1.71136	1.4286e-20	1.78671e-19	-1.92492	3.81469e-11	7.16546e-11	-2.35173	4.60345e-10	9.29813e-10	chrII	581726	582172	447	-	TATA-less	1_mis	TFIID-dominated	TAF1-enriched	NA	TFIID
YBR175W	-1.80012	2.63321e-21	6.26907e-21	-2.73215	1.38504e-43	3.55273e-43	-2.63949	8.86586e-38	3.77785e-37	-4.06549	2.01631e-38	4.53518e-38	-1.01108	0.000280387	0.000775863	-1.94474	1.00087e-12	3.86006e-12	-2.46806	3.14456e-30	2.8077e-29	-3.05525	2.83845e-23	1.58361e-22	chrII	582408	583355	948	+	TATA-less	2_mis	TFIID-dominated	TAF1-enriched	NA	TFIID
YBR176W	-1.75809	1.04728e-21	2.5527e-21	-2.91395	2.70613e-52	9.28533e-52	-2.43497	1.72463e-35	5.74905e-35	-3.71777	9.31625e-36	1.86519e-35	-0.662943	0.010246	0.0177959	-1.85956	1.18059e-13	5.18667e-13	-2.15415	5.00198e-26	2.74435e-25	-3.18121	9.34339e-25	6.12438e-24	chrII	583720	584658	939	+	TATA-less	1_mis	TFIID-dominated	TAF1-enriched	NA	TFIID
YBR177C	-3.40399	7.90635e-105	1.0232e-102	-4.40723	7.63497e-168	1.8058e-165	-3.29229	2.11665e-56	9.85859e-55	-4.52018	1.3134e-63	3.75153e-62	-1.41074	2.06997e-15	7.54346e-14	-2.30667	2.63889e-41	3.3845e-39	-2.31338	1.1309e-38	2.82422e-37	-2.95429	9.58719e-39	3.02066e-37	chrII	584807	586162	1356	-	NA	NA	TFIID-dominated	NA	NA	CR
YBR179C	-1.49111	1.97366e-21	4.72508e-21	-2.68789	3.66104e-64	1.9835e-63	-2.34721	3.09392e-25	5.12647e-25	-3.9658	8.54986e-39	1.96036e-38	-0.568495	0.00274201	0.00562337	-1.52404	2.69702e-16	1.71774e-15	-1.73874	1.01511e-20	3.48601e-20	-3.0222	4.39356e-30	5.11693e-29	chrII	586547	589114	2568	-	TATA-less	1_mis	TFIID-dominated	TAF1-enriched	NA	TFIID
YBR181C	-3.03952	1.38438e-99	1.39639e-97	-3.06341	1.4121e-98	3.58726e-97	-2.85835	4.35757e-47	5.76453e-46	-4.28289	3.02981e-58	4.58966e-57	-0.0562578	0.676377	0.720854	0.00104153	0.993818	0.99595	0.129598	0.425747	0.482528	0.160812	0.393458	0.447763	chrII	591712	592774	1063	-	TATA-less	1_mis	TFIID-dominated	TAF1-enriched	RPG	TFIID
YBR182C	-2.05991	1.89922e-09	2.70432e-09	-2.33719	5.30345e-11	7.11588e-11	-2.52167	4.9533e-19	6.94e-19	-4.1238	1.38451e-14	1.88507e-14	-0.334728	0.521503	0.577315	-1.23896	0.0151629	0.0206111	-1.73296	8.36532e-05	0.000120684	-2.19611	0.000405681	0.000597124	chrII	593506	594864	1359	-	NA	NA	SAGA-dominated	NA	NA	NA
YBR183W	-3.12442	3.82044e-25	1.12901e-24	-4.77607	1.28935e-35	2.63517e-35	-3.2503	1.50051e-42	1.1035e-41	-5.56952	8.22881e-43	2.42335e-42	-1.49842	0.000528102	0.00134611	-2.91386	5.81878e-11	1.80468e-10	-3.04693	7.50667e-28	5.07029e-27	-4.06126	2.71913e-24	1.68576e-23	chrII	596115	597065	951	+	TATA-less	1_mis	SAGA-dominated	TAF1-depleted	NA	NA
YBR185C	-1.86506	9.19926e-21	2.13456e-20	-3.04085	1.10727e-48	3.34573e-48	-2.75915	5.54703e-40	3.00516e-39	-4.23932	4.7382e-42	1.32807e-41	-0.742338	0.00127957	0.00289467	-2.22637	4.5076e-21	6.07922e-20	-2.2989	5.73353e-16	1.38514e-15	-3.46492	4.20861e-17	1.35682e-16	chrII	599123	599959	837	-	TATA-less	1_mis	TFIID-dominated	TAF1-enriched	NA	TFIID
YBR186W	-0.427393	0.612804	0.658399	-2.23068	0.0099808	0.0120165	-0.693285	0.209788	0.234704	-5.3347	0.000387853	0.000479904	0.534566	0.337091	0.396117	-0.603312	0.28555	0.336477	0.093428	0.917149	0.929382	-2.09496	0.0549833	0.0701077	chrII	600553	602360	1808	+	NA	NA	nocall	NA	NA	NA
YBR187W	-2.86304	1.34388e-47	1.4291e-46	-3.31469	4.40165e-59	1.96428e-58	-3.26594	5.20514e-58	3.16791e-56	-4.73343	2.97377e-45	1.06289e-44	-1.29002	1.53427e-12	3.28313e-11	-1.07841	1.0961e-09	2.90385e-09	-1.4836	6.35743e-18	1.75064e-17	-1.16997	3.29728e-09	6.31568e-09	chrII	602634	603476	843	+	TATA-less	2_mis	TFIID-dominated	TAF1-depleted	NA	TFIID
YBR188C	-1.70806	2.57836e-09	3.65392e-09	-2.9054	2.61902e-21	4.00086e-21	-2.94231	2.66461e-27	4.87247e-27	-4.57603	3.46227e-24	5.23065e-24	-0.937418	0.0105558	0.0182916	-1.76607	1.46894e-06	2.79311e-06	-2.41312	4.43664e-12	8.70501e-12	-3.098	3.89345e-12	8.85394e-12	chrII	603685	604107	423	-	NA	NA	TFIID-dominated	NA	NA	TFIID
YBR189W	-2.74438	6.69399e-76	2.39136e-74	-2.63938	1.7979e-69	1.21976e-68	-2.6604	8.66731e-39	4.10534e-38	-3.91226	7.97935e-50	4.42342e-49	-0.0848156	0.462694	0.521495	0.0965392	0.402337	0.459763	0.0605408	0.719258	0.766218	0.0265033	0.881792	0.897199	chrII	604508	605508	1001	+	TATA-less	2_mis	TFIID-dominated	TAF1-enriched	RPG	TFIID
YBR191W	-3.24906	3.8264e-58	6.6109e-57	-2.92506	1.81048e-46	5.0624e-46	-2.86513	1.17047e-42	8.76153e-42	-4.27248	1.11707e-53	9.44818e-53	-0.148302	0.195755	0.245531	-0.101494	0.373658	0.429694	0.0488885	0.749725	0.79009	0.0465591	0.7831	0.806216	chrII	606270	607140	871	+	TATA-less	1_mis	TFIID-dominated	TAF1-enriched	RPG	TFIID
YBR192W	-1.63194	2.4841e-16	4.59258e-16	-2.88279	1.01114e-43	2.60535e-43	-2.58706	1.27584e-31	3.06265e-31	-4.0714	2.06517e-48	9.83838e-48	-1.14515	7.28565e-06	3.28893e-05	-1.61726	1.63452e-10	4.78363e-10	-2.16723	9.01179e-25	4.39005e-24	-3.50749	3.25308e-36	7.97616e-35	chrII	607652	608785	1134	+	TATA-less	1_mis	TFIID-dominated	TAF1-enriched	NA	TFIID
YBR193C	-1.99027	6.58517e-18	1.32031e-17	-2.92838	6.37063e-34	1.24775e-33	-2.88996	3.37598e-37	1.34378e-36	-4.59259	6.76664e-39	1.56534e-38	-0.925043	0.00145853	0.0032494	-2.44898	1.20299e-16	8.08711e-16	-2.7627	1.432e-15	3.3696e-15	-3.72762	7.2021e-18	2.47482e-17	chrII	609082	609753	672	-	TATA-less	1_mis	TFIID-dominated	TAF1-depleted	NA	TFIID
YBR194W	-1.71135	6.08454e-08	8.36014e-08	-3.28931	2.9188e-22	4.53045e-22	-2.66711	9.52997e-22	1.41818e-21	-3.83841	2.21617e-15	3.03395e-15	-0.873029	0.0345402	0.0525001	-2.08995	5.70489e-07	1.13215e-06	-2.17699	3.67165e-07	5.8101e-07	-2.86371	1.99884e-06	3.32224e-06	chrII	610038	610409	372	+	NA	NA	TFIID-dominated	NA	NA	TFIID
YBR195C	-1.2733	3.11545e-12	4.83897e-12	-1.69711	2.7358e-19	4.06517e-19	-2.35614	1.33151e-30	2.95027e-30	-4.07655	7.25112e-38	1.59321e-37	-0.647834	0.0110608	0.0190787	-1.19064	4.11791e-06	7.46129e-06	-2.11111	4.04358e-16	9.86747e-16	-3.11459	2.92608e-18	1.04341e-17	chrII	610614	611882	1269	-	TATA-less	1_mis	TFIID-dominated	TAF1-enriched	NA	TFIID
YBR196C	-2.84287	1.07002e-75	3.74454e-74	-2.83015	9.39854e-75	7.78558e-74	-2.83835	2.16507e-48	3.48229e-47	-4.18355	1.30189e-60	2.5661e-59	-0.180721	0.0959266	0.129882	-0.530801	9.64551e-07	1.86992e-06	-0.310987	0.0314668	0.0399417	-0.289268	0.114368	0.140737	chrII	612236	613900	1665	-	TATA-containing	0_mis	TFIID-dominated	TAF1-depleted	NA	CR
YBR197C	-1.8166	1.03434e-16	1.95496e-16	-2.4354	2.24986e-26	3.72119e-26	-2.50721	1.59022e-25	2.66573e-25	-3.47291	1.1299e-22	1.67473e-22	-0.726484	0.0109452	0.0189113	-1.61192	2.09946e-08	4.81168e-08	-1.94175	7.69403e-08	1.25973e-07	-2.00937	5.37173e-06	8.71286e-06	chrII	615203	615856	654	-	TATA-less	1_mis	TFIID-dominated	TAF1-enriched	NA	TFIID
YBR198C	-1.11599	4.74912e-17	9.12443e-17	-1.85591	1.89454e-43	4.84152e-43	-2.16611	1.41211e-23	2.21285e-23	-3.34648	6.788e-35	1.32058e-34	-0.398567	0.00922376	0.0162218	-0.857429	1.19587e-08	2.82697e-08	-2.05359	2.98761e-20	9.88992e-20	-2.51688	5.95053e-11	1.27119e-10	chrII	616127	618523	2397	-	TATA-less	2_mis	TFIID-dominated	TAF1-depleted	NA	TFIID
YBR199W	-1.30836	1.15642e-19	2.53414e-19	-2.28016	2.15683e-55	8.26001e-55	-1.89797	1.35589e-18	1.88436e-18	-3.33405	1.0024e-38	2.28747e-38	-0.341633	0.0288946	0.0447907	-0.682646	8.8325e-06	1.55055e-05	-1.18939	6.37534e-15	1.45143e-14	-1.53937	2.19241e-14	5.80078e-14	chrII	618909	620303	1395	+	TATA-less	1_mis	TFIID-dominated	TAF1-enriched	NA	TFIID
YBR200W	-1.33244	8.9603e-15	1.5438e-14	-2.38279	2.60451e-42	6.41679e-42	-2.36299	7.14897e-29	1.42364e-28	-3.59554	4.0281e-36	8.21835e-36	-0.203621	0.264751	0.320763	-1.12739	4.16985e-10	1.15572e-09	-1.58045	1.46249e-13	3.09497e-13	-1.65839	1.81797e-09	3.54676e-09	chrII	620872	622527	1656	+	TATA-less	2_mis	TFIID-dominated	TAF1-enriched	NA	TFIID
YBR201W	-2.12501	7.47061e-18	1.49521e-17	-3.02261	1.56698e-30	2.84412e-30	-2.79765	2.31748e-35	7.6193e-35	-4.46737	1.16152e-32	2.09802e-32	-1.12502	0.000868768	0.0020738	-1.73392	6.19176e-07	1.22431e-06	-2.33175	2.63007e-18	7.50561e-18	-3.61171	8.66754e-20	3.49812e-19	chrII	623576	624211	636	+	TATA-less	1_mis	TFIID-dominated	TAF1-enriched	NA	TFIID
YBR202W	-1.34406	3.8054e-20	8.54378e-20	-1.97296	1.26535e-40	2.97532e-40	-2.33921	3.18078e-32	8.02916e-32	-3.80705	2.85924e-45	1.02304e-44	-0.417502	0.00570389	0.0106739	-0.835279	2.89324e-08	6.53818e-08	-1.83656	3.44167e-25	1.7336e-24	-2.24259	2.70952e-24	1.6814e-23	chrII	625772	628309	2538	+	TATA-less	2_mis	TFIID-dominated	TAF1-depleted	NA	TFIID
YBR203W	-2.24407	1.08892e-23	2.97446e-23	-3.37757	4.65515e-43	1.17735e-42	-3.07558	2.62934e-37	1.06363e-36	-4.87685	7.5232e-38	1.65192e-37	-1.33174	0.000140612	0.000428317	-2.28347	1.97387e-10	5.70782e-10	-2.45222	4.7414e-17	1.22345e-16	-2.98931	1.05597e-13	2.65192e-13	chrII	629168	631942	2775	+	NA	NA	TFIID-dominated	NA	NA	NA
YBR204C	-2.28269	6.03232e-34	2.97239e-33	-4.00056	8.51337e-82	9.54137e-81	-3.16155	2.56015e-53	7.36951e-52	-4.94038	1.45502e-54	1.39124e-53	-0.968514	0.000184698	0.000541221	-2.49611	2.4762e-21	3.46827e-20	-2.75732	9.09025e-34	1.20919e-32	-3.94097	9.44062e-36	2.19116e-34	chrII	632254	633381	1128	-	NA	NA	TFIID-dominated	NA	NA	TFIID
YBR205W	-2.13724	1.69265e-34	8.61266e-34	-3.02764	1.76529e-62	8.81229e-62	-2.65035	1.1326e-37	4.77156e-37	-4.23121	1.58482e-43	4.90058e-43	-0.639203	0.000230142	0.00065585	-0.913232	7.58581e-08	1.63975e-07	-0.772591	6.22965e-06	9.40363e-06	-0.793861	0.000140393	0.000211955	chrII	633622	634836	1215	+	TATA-less	1_mis	TFIID-dominated	TAF1-enriched	NA	TFIID
YBR207W	-1.82271	7.18266e-32	3.12601e-31	-2.63191	5.0816e-61	2.41711e-60	-2.68397	3.08963e-41	1.96979e-40	-4.03449	2.27779e-55	2.39915e-54	-1.13745	1.28058e-08	1.23796e-07	-1.73172	2.17652e-18	1.88564e-17	-2.33213	5.97468e-45	3.44628e-43	-3.0983	3.70013e-42	1.59816e-40	chrII	635146	636543	1398	+	TATA-less	1_mis	TFIID-dominated	TAF1-enriched	NA	TFIID
YBR208C	-2.7684	2.19171e-72	6.5934e-71	-2.70928	1.23503e-67	7.81463e-67	-2.95162	7.06511e-49	1.22128e-47	-4.0484	9.98826e-44	3.1273e-43	-1.00209	1.37662e-09	1.64892e-08	-0.889395	1.64504e-08	3.82382e-08	-0.917112	6.50964e-08	1.07011e-07	-0.621974	0.00136108	0.0019416	chrII	636703	642210	5508	-	TATA-less	1_mis	SAGA-dominated	TAF1-depleted	NA	TFIID
YBR210W	-2.25612	1.7881e-21	4.29282e-21	-3.16089	3.54468e-35	7.15298e-35	-2.80647	1.05352e-32	2.76554e-32	-4.68819	4.75155e-30	8.03164e-30	-1.21828	0.000108032	0.000341893	-1.77247	1.66001e-08	3.85314e-08	-1.98134	1.12979e-13	2.40809e-13	-2.83626	1.17991e-14	3.17073e-14	chrII	645550	645978	429	+	TATA-less	1_mis	TFIID-dominated	TAF1-enriched	NA	TFIID
YBR211C	-1.49595	1.64931e-13	2.68708e-13	-2.36485	1.86357e-29	3.29439e-29	-2.32451	1.26278e-31	3.0324e-31	-4.13853	6.25559e-41	1.63954e-40	-0.632231	0.0204564	0.0329682	-1.69491	3.12542e-10	8.81179e-10	-2.01398	1.7401e-21	6.3683e-21	-3.04205	2.214e-19	8.63619e-19	chrII	646158	647132	975	-	TATA-less	1_mis	TFIID-dominated	TAF1-enriched	NA	TFIID
YBR212W	-1.35654	9.40909e-18	1.87498e-17	-2.77883	1.22321e-68	8.05184e-68	-2.78901	3.58764e-44	3.30526e-43	-3.92041	1.11823e-41	3.06422e-41	0.0844934	0.575366	0.62789	-1.30639	4.17849e-19	4.11e-18	-2.21833	1.68119e-14	3.74631e-14	-1.83588	1.17547e-06	1.9764e-06	chrII	647886	649904	2019	+	TATA-less	2_mis	TFIID-dominated	TAF1-enriched	NA	TFIID
YBR213W	-1.1899	1.01494e-06	1.35755e-06	-3.00489	2.29585e-33	4.45341e-33	-2.42994	2.02129e-26	3.54056e-26	-4.86715	4.93916e-30	8.34249e-30	-0.483865	0.112632	0.150068	-2.3674	8.06049e-15	4.13195e-14	-1.88912	0.0111876	0.0145667	-2.30399	0.0156101	0.0208411	chrII	650368	651192	825	+	NA	NA	TFIID-dominated	NA	NA	TFIID
YBR214W	-1.77835	1.56592e-23	4.23693e-23	-3.76017	3.62982e-90	6.27126e-89	-2.5209	4.64724e-25	7.63386e-25	-4.09327	6.63496e-18	9.27931e-18	-0.140107	0.517923	0.574482	-1.77517	5.46971e-17	3.84703e-16	-2.1859	0.000167055	0.000237122	-2.09496	0.0549833	0.0701077	chrII	651415	652998	1584	+	TATA-less	1_mis	TFIID-dominated	TAF1-enriched	NA	TFIID
YBR215W	-1.20895	7.31208e-12	1.12e-11	-2.55573	3.16101e-44	8.26586e-44	-2.57922	3.07921e-29	6.28109e-29	-4.61766	3.30431e-37	7.08472e-37	-0.505214	0.0251188	0.0395495	-1.40081	6.36262e-10	1.73191e-09	-1.80049	5.84234e-08	9.62354e-08	-3.48911	3.03563e-12	6.94193e-12	chrII	653356	655317	1962	+	TATA-less	2_mis	TFIID-dominated	TAF1-depleted	NA	TFIID
YBR216C	-1.31416	1.90312e-18	3.91058e-18	-2.61972	3.00908e-65	1.70997e-64	-2.31582	1.82155e-29	3.75449e-29	-3.94835	1.21761e-41	3.32709e-41	-0.316775	0.104531	0.140332	-1.31288	1.06925e-11	3.62194e-11	-1.66356	6.25895e-20	2.02662e-19	-2.31645	7.07964e-19	2.65365e-18	chrII	655576	657600	2025	-	NA	NA	TFIID-dominated	NA	NA	TFIID
YBR217W	-1.32787	2.64699e-09	3.74885e-09	-2.71659	3.45384e-30	6.21618e-30	-2.34773	1.91888e-21	2.83105e-21	-4.11998	1.10753e-28	1.81474e-28	-0.644729	0.054411	0.0784212	-1.45615	1.21634e-05	2.10701e-05	-2.04299	1.26569e-14	2.83302e-14	-3.47185	2.12597e-20	9.02707e-20	chrII	657832	658392	561	+	TATA-less	2_mis	TFIID-dominated	TAF1-enriched	NA	TFIID
YBR218C	-2.72277	7.91071e-76	2.81138e-74	-2.2626	9.09784e-53	3.19029e-52	-2.6815	1.42095e-37	5.92311e-37	-3.9075	8.19361e-51	5.08124e-50	-0.0902104	0.397869	0.458063	0.0750055	0.476165	0.531954	-0.438258	0.0202925	0.0260572	-0.320182	0.0996792	0.123595	chrII	658707	662249	3543	-	TATA-less	1_mis	SAGA-dominated	TAF1-depleted	NA	CR
YBR221C	-2.13503	1.07023e-41	8.26653e-41	-2.75869	3.68015e-67	2.25982e-66	-2.64718	1.59203e-38	7.3589e-38	-3.92713	2.1021e-48	1.00072e-47	0.030079	0.791972	0.819925	-0.356019	0.00164394	0.00241153	-0.346145	0.0253919	0.032401	-0.482503	0.0091117	0.0123805	chrII	665153	666253	1101	-	TATA-less	2_mis	TFIID-dominated	TAF1-enriched	NA	TFIID
YBR222C	-2.87137	7.9828e-76	2.82237e-74	-2.60118	1.90118e-61	9.19618e-61	-2.61057	5.65463e-40	3.05605e-39	-4.82797	1.13299e-66	4.54613e-65	-0.972366	3.14175e-11	5.42855e-10	-1.2723	4.60495e-19	4.46581e-18	-0.99899	8.8149e-08	1.43891e-07	-1.64783	5.71954e-13	1.37294e-12	chrII	666720	668351	1632	-	TATA-containing	0_mis	TFIID-dominated	TAF1-depleted	NA	TFIID
YBR223C	-2.04538	3.09462e-25	9.2287e-25	-3.5677	9.71621e-64	5.14224e-63	-2.91536	1.04938e-36	3.96964e-36	-4.62125	1.57834e-30	2.69698e-30	-0.96938	0.00170192	0.00372538	-2.32108	5.28183e-14	2.44504e-13	-2.14593	1.11478e-07	1.81291e-07	-3.8221	1.22279e-07	2.156e-07	chrII	668663	670297	1635	-	NA	NA	TFIID-dominated	NA	NA	TFIID
YBR227C	-1.60045	2.92015e-17	5.66119e-17	-2.85441	3.85113e-47	1.10338e-46	-2.50209	1.06817e-28	2.10341e-28	-3.75821	1.1528e-36	2.40439e-36	-0.62562	0.00639147	0.0117771	-1.06285	2.8439e-06	5.23262e-06	-1.79685	4.03193e-25	2.02311e-24	-2.27071	1.23491e-17	4.17958e-17	chrII	673572	675134	1563	-	NA	NA	TFIID-dominated	NA	NA	TFIID
YBR228W	-1.85054	1.09466e-13	1.7958e-13	-3.61666	7.89113e-39	1.75617e-38	-2.70952	6.82005e-30	1.44708e-29	-3.88504	2.47357e-26	3.86695e-26	-1.19263	0.00242061	0.00504685	-1.57186	5.37909e-05	8.82704e-05	-2.17876	1.06053e-11	2.04513e-11	-3.24946	2.22826e-09	4.32006e-09	chrII	675313	676227	915	+	TATA-less	1_mis	TFIID-dominated	TAF1-enriched	NA	TFIID
YBR229C	-1.88445	2.93035e-30	1.17358e-29	-2.879	2.02073e-66	1.20628e-65	-2.59589	1.36863e-31	3.27252e-31	-4.02127	2.52872e-43	7.72716e-43	-0.36486	0.0123054	0.0209433	-0.910229	2.28372e-10	6.54879e-10	-0.950623	2.5497e-08	4.26126e-08	-0.982142	5.28613e-06	8.57898e-06	chrII	676357	679221	2865	-	TATA-less	2_mis	TFIID-dominated	TAF1-enriched	NA	TFIID
YBR230C	-2.975	7.33782e-41	5.37141e-40	-3.48129	2.97645e-51	9.88165e-51	-2.90413	2.26775e-25	3.78071e-25	-4.93746	2.85319e-23	4.25799e-23	-1.01144	2.43533e-05	9.27989e-05	-1.5682	2.6858e-11	8.6712e-11	-1.64446	2.5897e-05	3.80772e-05	-2.69331	7.62241e-07	1.29361e-06	chrII	679549	680050	502	-	TATA-containing	0_mis	TFIID-dominated	TAF1-enriched	NA	CR
YBR231C	-1.72225	9.90538e-08	1.35557e-07	-2.84969	3.62636e-17	5.22108e-17	-2.7241	3.28983e-29	6.69851e-29	-4.52978	6.69321e-30	1.12404e-29	-1.06976	0.00493302	0.00941958	-1.35426	0.000246727	0.000385074	-2.34225	4.60668e-15	1.05837e-14	-3.14639	1.39214e-08	2.57211e-08	chrII	682179	683090	912	-	TATA-less	2_mis	TFIID-dominated	TAF1-enriched	NA	TFIID
YBR233W	-1.37974	4.33529e-13	6.95411e-13	-2.46033	1.99714e-35	4.05637e-35	-2.82134	5.17791e-34	1.51387e-33	-4.60065	3.73206e-30	6.31947e-30	-0.382432	0.13503	0.176546	-1.09738	1.47798e-05	2.54077e-05	-1.90487	6.06699e-08	9.98603e-08	-3.51574	3.60427e-11	7.78895e-11	chrII	683428	684669	1242	+	NA	NA	TFIID-dominated	NA	NA	TFIID
YBR233W-A	-2.41985	5.85637e-22	1.44648e-21	-3.97937	9.32006e-41	2.1998e-40	-2.69787	2.47642e-21	3.64961e-21	-4.87731	1.27471e-23	1.91292e-23	-1.33007	4.02827e-05	0.000144955	-1.93166	3.08064e-09	7.75914e-09	-2.3294	8.81948e-08	1.43929e-07	-2.87725	3.08894e-09	5.93055e-09	chrII	684977	685261	285	+	TATA-less	1_mis	NA	TAF1-enriched	NA	TFIID
YBR234C	-1.83814	4.12308e-34	2.05078e-33	-2.44175	4.49406e-57	1.85245e-56	-2.26228	2.65574e-29	5.43382e-29	-3.56418	2.27045e-35	4.49754e-35	-0.107492	0.417885	0.477799	-0.508792	9.41338e-05	0.000151545	-0.616531	2.81623e-05	4.138e-05	-0.560314	0.00414691	0.00576308	chrII	685438	686592	1155	-	TATA-less	1_mis	TFIID-dominated	TAF1-enriched	NA	TFIID
YBR235W	-2.2054	9.03647e-34	4.39618e-33	-3.51662	2.17492e-76	1.91992e-75	-2.7509	6.28214e-43	4.85419e-42	-4.09472	1.09098e-46	4.43565e-46	-1.36827	9.34889e-11	1.47159e-09	-1.74161	2.03694e-17	1.54209e-16	-2.1137	5.56453e-35	8.73967e-34	-2.56707	3.65528e-31	4.84548e-30	chrII	686901	690263	3363	+	NA	NA	TFIID-dominated	NA	NA	TFIID
YBR236C	-1.59378	1.78605e-25	5.43985e-25	-2.24312	7.92343e-48	2.33348e-47	-2.20059	2.75582e-27	5.03083e-27	-3.17766	1.12899e-35	2.2543e-35	-0.878263	3.6978e-06	1.81066e-05	-1.44703	1.94518e-15	1.08469e-14	-2.22729	2.10069e-39	5.84026e-38	-2.4778	8.06632e-28	7.37848e-27	chrII	690383	691693	1311	-	TATA-less	2_mis	TFIID-dominated	TAF1-enriched	NA	TFIID
YBR237W	-0.89765	6.75908e-08	9.27396e-08	-2.25123	8.82254e-40	2.01109e-39	-2.03418	5.96403e-19	8.33696e-19	-3.65119	6.91708e-44	2.19943e-43	-0.0408223	0.846999	0.869856	-0.646376	0.00193873	0.00282558	-1.49503	2.55249e-17	6.73023e-17	-1.8676	9.58842e-16	2.76952e-15	chrII	691969	694518	2550	+	TATA-less	2_mis	nocall	TAF1-enriched	NA	TFIID
YBR238C	-1.71052	3.06242e-25	9.13664e-25	-1.38364	1.07533e-16	1.53788e-16	-2.40863	3.01808e-29	6.15828e-29	-2.91872	4.97541e-16	6.85174e-16	-0.24839	0.131644	0.172644	-0.0262123	0.874859	0.900607	-1.38406	0.000404441	0.000564485	-1.37864	0.0919842	0.114467	chrII	695107	697302	2196	-	TATA-less	1_mis	TFIID-dominated	TAF1-enriched	NA	TFIID
YBR239C	-0.908112	6.13132e-06	8.09991e-06	-1.25609	1.31845e-09	1.74177e-09	-1.85225	3.11726e-13	4.06128e-13	-2.70825	2.42954e-11	3.22646e-11	-0.0453938	0.867973	0.886864	-0.426018	0.123507	0.153907	-1.2793	0.0179337	0.0230966	-1.92807	0.0192882	0.0255582	chrII	698354	699943	1590	-	NA	NA	TFIID-dominated	NA	NA	TFIID
YBR240C	-2.08951	1.05546e-05	1.39005e-05	-3.19224	3.90558e-08	5.088e-08	-3.10051	4.35736e-16	5.85316e-16	-5.0389	2.69044e-07	3.4598e-07	-1.39963	0.0153755	0.0254973	-0.9152	0.108494	0.136133	-2.76741	1.08132e-05	1.61135e-05	-1.19913	0.196948	0.235644	chrII	700490	701842	1353	-	NA	NA	SAGA/TFIID-dominated	NA	NA	NA
YBR243C	-2.82457	2.60365e-51	3.23523e-50	-4.05831	3.62013e-89	5.96887e-88	-2.98334	3.3248e-41	2.11169e-40	-4.32807	5.74626e-43	1.7132e-42	-1.7399	1.89186e-13	4.77972e-12	-1.98413	9.67904e-19	8.94217e-18	-1.97961	1.16389e-15	2.74963e-15	-2.72565	3.35631e-18	1.19291e-17	chrII	705447	706793	1347	-	TATA-less	1_mis	TFIID-dominated	TAF1-enriched	NA	CR
YBR244W	-3.25873	5.55263e-68	1.42642e-66	-6.39275	1.00203e-229	1.71824e-226	-3.09259	6.28465e-51	1.41863e-49	-4.95484	1.32526e-87	7.44467e-85	-1.39585	0.000151508	0.000457799	-2.98993	2.35105e-16	1.5108e-15	-2.69845	2.51204e-73	1.09157e-70	-3.90338	6.37928e-70	1.73357e-67	chrII	707528	708016	489	+	TATA-containing	0_mis	SAGA-dominated	TAF1-depleted	NA	CR
YBR245C	-2.08044	2.78866e-52	3.64332e-51	-2.90776	6.51254e-97	1.54566e-95	-2.85259	2.91789e-38	1.30818e-37	-4.44913	2.67152e-51	1.75353e-50	-0.369368	0.00963205	0.0168365	-0.787706	2.33514e-08	5.32942e-08	-1.05575	8.20597e-10	1.45462e-09	-0.930942	1.66306e-05	2.63969e-05	chrII	708150	711539	3390	-	NA	NA	TFIID-dominated	NA	NA	TFIID
YBR246W	-1.62145	1.99621e-18	4.09573e-18	-2.05563	1.11205e-27	1.88754e-27	-2.50773	4.05903e-31	9.32965e-31	-4.04905	5.46651e-30	9.21935e-30	-0.638976	0.00139829	0.00312563	-1.25468	1.78802e-10	5.20259e-10	-2.33784	9.12524e-13	1.85118e-12	-2.48001	0.00023351	0.000349141	chrII	711591	712754	1164	+	TATA-less	2_mis	TFIID-dominated	TAF1-depleted	NA	TFIID
YBR247C	-1.5347	7.61189e-18	1.52304e-17	-1.50088	1.15269e-16	1.64818e-16	-2.50514	4.14256e-34	1.22182e-33	-3.64794	1.15841e-37	2.52959e-37	-0.559659	0.00280886	0.00573356	-0.675904	0.000353744	0.000545975	-1.90744	3.48417e-28	2.43406e-27	-1.98008	3.9555e-17	1.27838e-16	chrII	713004	714455	1452	-	TATA-less	1_mis	TFIID-dominated	TAF1-depleted	NA	TFIID
YBR248C	-1.4013	3.02985e-15	5.3355e-15	-2.42687	7.24703e-42	1.76267e-41	-2.05339	1.3452e-24	2.17089e-24	-3.5246	3.31422e-45	1.17833e-44	-0.43449	0.00348681	0.00695069	-0.692867	1.41084e-06	2.68812e-06	-1.22128	2.94937e-15	6.84372e-15	-1.56424	1.30032e-12	3.05609e-12	chrII	714807	716465	1659	-	TATA-less	1_mis	SAGA-dominated	TAF1-depleted	NA	TFIID
YBR249C	-1.98319	3.17135e-32	1.41249e-31	-1.79873	1.8375e-26	3.04725e-26	-1.96229	5.23775e-23	8.06094e-23	-2.98735	4.48166e-30	7.57925e-30	0.321112	0.00699064	0.0127185	0.161567	0.166587	0.204092	-0.161319	0.275277	0.321033	-0.0436313	0.805608	0.827168	chrII	716882	717994	1113	-	TATA-less	1_mis	SAGA/TFIID-dominated	TAF1-enriched	NA	CR
YBR250W	-1.49713	0.000100145	0.000129505	-2.3965	1.65388e-08	2.16323e-08	-2.22638	1.88171e-14	2.48732e-14	-3.41139	2.71038e-07	3.48477e-07	-1.06746	0.0582505	0.0833755	-0.487824	0.386282	0.443431	-1.75671	0.00638036	0.00841846	-0.829518	0.424108	0.479964	chrII	719033	720604	1572	+	NA	NA	TFIID-dominated	NA	NA	NA
YBR251W	-1.31866	1.7583e-14	2.98593e-14	-2.62284	3.5853e-49	1.10474e-48	-2.26694	5.14803e-25	8.43995e-25	-4.10794	3.43944e-45	1.21835e-44	-0.794617	9.87125e-05	0.000317241	-1.80056	1.65831e-18	1.47578e-17	-2.00681	9.21666e-26	4.91204e-25	-3.41884	2.10105e-39	7.13701e-38	chrII	721390	722313	924	+	TATA-less	2_mis	TFIID-dominated	TAF1-enriched	NA	TFIID
YBR252W	-3.1179	1.26021e-50	1.54078e-49	-2.80061	4.69376e-39	1.05039e-38	-2.80441	2.07935e-39	1.05175e-38	-5.19836	1.94397e-41	5.24593e-41	-1.74346	1.11041e-15	4.30767e-14	-1.41698	9.01807e-12	3.08349e-11	-1.63033	1.3215e-19	4.1571e-19	-2.3267	2.60556e-24	1.61997e-23	chrII	722611	723054	444	+	TATA-containing	0_mis	TFIID-dominated	TAF1-enriched	NA	TFIID
YBR253W	-1.44577	4.65858e-10	6.754e-10	-2.18299	2.63035e-19	3.90934e-19	-2.09787	1.85999e-16	2.51208e-16	-4.12361	9.43726e-22	1.38117e-21	-0.559044	0.0388924	0.0584358	-1.1147	2.54715e-05	4.28853e-05	-1.5291	3.20395e-08	5.33419e-08	-1.99933	8.44808e-08	1.5046e-07	chrII	723270	723635	366	+	TATA-less	3_mis	TFIID-dominated	TAF1-enriched	NA	TFIID
YBR254C	-1.78218	6.86472e-15	1.18932e-14	-2.89615	1.0765e-33	2.10002e-33	-2.57004	2.54352e-33	7.02505e-33	-4.24616	3.09655e-38	6.90502e-38	-1.10196	0.000120097	0.000373781	-1.74338	4.0373e-10	1.12136e-09	-2.13083	2.50876e-24	1.16137e-23	-2.97529	2.65811e-23	1.48937e-22	chrII	723736	724263	528	-	NA	NA	TFIID-dominated	NA	NA	TFIID
YBR255W	-1.39336	2.00265e-14	3.39249e-14	-2.82381	3.36409e-50	1.08076e-49	-2.31071	2.80187e-28	5.39849e-28	-3.92177	6.09882e-49	3.07266e-48	-0.9196	0.000544665	0.00138206	-1.57254	1.23158e-09	3.22875e-09	-1.8378	1.14806e-24	5.5471e-24	-2.32009	2.01707e-21	9.46427e-21	chrII	724456	726540	2085	+	NA	NA	TFIID-dominated	NA	NA	TFIID
YBR256C	-1.75684	1.09654e-27	3.76623e-27	-3.19643	2.19678e-86	3.14566e-85	-2.48529	8.85005e-38	3.77351e-37	-4.16209	1.09845e-59	1.96932e-58	-0.448391	0.00227149	0.00477735	-1.59783	4.05599e-30	1.70066e-28	-1.45472	1.41405e-22	5.6063e-22	-1.85287	8.80828e-21	3.87897e-20	chrII	727386	728102	717	-	TATA-containing	0_mis	TFIID-dominated	TAF1-enriched	NA	CR
YBR257W	-1.21125	4.80573e-08	6.61631e-08	-2.35832	5.84323e-25	9.43472e-25	-2.71675	2.66189e-34	7.99163e-34	-4.27244	1.59716e-40	4.05669e-40	-0.85054	0.00215925	0.00457168	-1.32189	2.57268e-06	4.76441e-06	-2.38863	3.74948e-27	2.32532e-26	-2.98421	1.67176e-17	5.58568e-17	chrII	728885	729724	840	+	TATA-less	2_mis	TFIID-dominated	TAF1-enriched	NA	TFIID
YBR258C	-1.6344	3.61414e-07	4.87692e-07	-2.7223	2.44547e-15	3.43226e-15	-2.45338	6.50514e-19	9.08769e-19	-3.74956	1.61702e-18	2.27327e-18	-1.01218	0.0119296	0.0203729	-1.33167	0.000495104	0.000754537	-2.41568	5.91138e-12	1.15326e-11	-2.70177	3.80823e-09	7.273e-09	chrII	729734	730162	429	-	TATA-less	1_mis	TFIID-dominated	TAF1-enriched	NA	TFIID
YBR259W	-1.94899	5.15052e-25	1.51425e-24	-2.6063	2.63155e-41	6.29571e-41	-2.77882	7.22963e-39	3.46846e-38	-4.13485	5.85214e-50	3.29018e-49	-1.02445	0.000315248	0.000857344	-1.79044	1.86874e-10	5.4206e-10	-2.45427	1.21246e-33	1.58373e-32	-2.46661	2.69671e-20	1.13338e-19	chrII	730387	732453	2067	+	NA	NA	TFIID-dominated	NA	NA	TFIID
YBR260C	-1.73198	1.59977e-22	4.09891e-22	-2.80503	9.89978e-55	3.6984e-54	-2.76957	1.30379e-37	5.46189e-37	-4.27414	7.23869e-51	4.52653e-50	-0.69922	0.000491728	0.00126736	-1.50971	1.05133e-14	5.33494e-14	-2.24991	4.46415e-29	3.47638e-28	-2.63943	1.14854e-27	1.03037e-26	chrII	732639	734639	2001	-	NA	NA	TFIID-dominated	NA	NA	TFIID
YBR261C	-2.39726	3.27973e-40	2.32393e-39	-2.71823	4.76945e-48	1.41251e-47	-2.98587	3.55091e-47	4.75369e-46	-4.20869	5.52427e-37	1.17178e-36	-1.07666	4.52833e-07	2.86922e-06	-1.78685	7.58057e-18	6.05653e-17	-1.7771	2.89842e-23	1.21257e-22	-2.09004	9.49972e-18	3.24044e-17	chrII	734832	735530	699	-	TATA-less	1_mis	TFIID-dominated	TAF1-enriched	NA	TFIID
YBR262C	-2.07112	5.61349e-23	1.47861e-22	-2.71234	3.22593e-35	6.51743e-35	-2.7028	1.16186e-27	2.16461e-27	-4.08099	1.68661e-32	3.03184e-32	-1.23101	2.37282e-06	1.22786e-05	-2.18209	7.72631e-17	5.32538e-16	-3.07436	7.26998e-33	8.64703e-32	-4.00073	5.51337e-36	1.32199e-34	chrII	735720	736040	321	-	TATA-containing	0_mis	TFIID-dominated	TAF1-enriched	NA	TFIID
YBR263W	-2.11166	1.05297e-40	7.64264e-40	-2.22077	8.0965e-44	2.09246e-43	-2.56394	3.33772e-40	1.86395e-39	-3.99205	3.77435e-56	4.31236e-55	0.00292918	0.979852	0.983122	0.0608493	0.595131	0.649225	-0.0535225	0.71519	0.766218	0.066845	0.704325	0.747901	chrII	736264	737736	1473	+	NA	NA	TFIID-dominated	NA	NA	TFIID
YBR264C	-2.17703	2.25905e-15	4.00176e-15	-3.7657	9.96575e-35	1.99286e-34	-2.93892	5.3981e-36	1.89655e-35	-4.29192	1.94733e-23	2.91451e-23	-1.24814	0.000207018	0.000599903	-1.8949	1.56313e-08	3.65158e-08	-2.33081	4.24595e-20	1.39211e-19	-3.58073	4.08555e-14	1.05696e-13	chrII	737770	738369	600	-	TATA-less	2_mis	TFIID-dominated	TAF1-enriched	NA	TFIID
YBR265W	-2.26509	1.10735e-29	4.30819e-29	-2.13294	9.99153e-26	1.63366e-25	-2.90097	8.82088e-46	9.71456e-45	-4.07409	1.52685e-45	5.61509e-45	-1.26781	8.22774e-12	1.57559e-10	-1.49983	5.55486e-16	3.35188e-15	-2.33638	9.32756e-21	3.21678e-20	-2.85353	4.42028e-14	1.13994e-13	chrII	738582	739544	963	+	TATA-less	1_mis	SAGA/TFIID-dominated	TAF1-enriched	NA	TFIID
YBR267W	-1.78979	2.48914e-16	4.60064e-16	-1.95326	1.41276e-18	2.07319e-18	-2.82585	3.5137e-41	2.22115e-40	-4.00964	2.34211e-40	5.87795e-40	-0.967039	8.07264e-07	4.76357e-06	-1.26523	3.40572e-10	9.56497e-10	-2.8806	3.28587e-38	7.78811e-37	-3.10899	2.02522e-18	7.32177e-18	chrII	739841	741022	1182	+	TATA-less	2_mis	TFIID-dominated	TAF1-enriched	NA	TFIID
YBR268W	-2.19992	8.92823e-20	1.96846e-19	-3.139	4.07785e-33	7.85232e-33	-2.86083	9.73094e-30	2.04082e-29	-4.31938	2.58181e-26	4.03336e-26	-1.34025	2.50523e-06	1.28862e-05	-1.6486	2.24037e-09	5.7288e-09	-2.3298	3.67712e-23	1.52659e-22	-3.76147	1.36646e-26	1.09616e-25	chrII	741299	741616	318	+	TATA-less	1_mis	TFIID-dominated	TAF1-enriched	NA	TFIID
YBR269C	-2.1983	5.5969e-26	1.75373e-25	-3.1289	1.61379e-46	4.52163e-46	-2.56582	6.60769e-30	1.40424e-29	-4.68203	1.50238e-31	2.62507e-31	-0.525069	0.04832	0.0706242	-1.46954	1.36119e-08	3.20042e-08	-1.70749	2.38359e-09	4.14852e-09	-3.16474	9.16442e-17	2.87911e-16	chrII	742160	742576	417	-	TATA-less	1_mis	TFIID-dominated	TAF1-enriched	NA	TFIID
YBR270C	-2.27547	8.74692e-22	2.13963e-21	-3.66709	1.36814e-40	3.21262e-40	-3.26157	8.43109e-37	3.22207e-36	-5.24699	7.31343e-33	1.32991e-32	-1.46756	0.000115504	0.000362299	-1.56764	2.54565e-05	4.28741e-05	-2.86848	1.37892e-11	2.64037e-11	-1.89027	0.00276849	0.00387553	chrII	742761	744398	1638	-	NA	NA	TFIID-dominated	NA	NA	NA
YBR271W	-1.5487	4.9631e-17	9.52488e-17	-1.7885	3.79493e-20	5.7057e-20	-2.6333	3.43618e-35	1.11389e-34	-3.88253	5.29704e-36	1.07585e-35	-0.848259	0.000768492	0.00186856	-0.898035	0.000459549	0.000701988	-2.02446	5.46839e-23	2.23327e-22	-2.33201	1.94154e-14	5.15261e-14	chrII	744852	746111	1260	+	TATA-less	2_mis	TFIID-dominated	TAF1-enriched	NA	TFIID
YBR272C	-2.13991	3.11544e-26	9.88839e-26	-3.69288	2.20649e-66	1.31603e-65	-2.89522	1.6822e-49	3.10813e-48	-4.57913	1.12871e-51	7.68547e-51	-1.40495	2.05765e-07	1.44541e-06	-1.75726	8.43712e-12	2.88938e-11	-2.33322	3.66324e-37	7.65288e-36	-3.30414	8.59357e-34	1.55687e-32	chrII	746361	747803	1443	-	TATA-containing	0_mis	TFIID-dominated	TAF1-enriched	NA	TFIID
YBR273C	-1.69192	8.85073e-22	2.16425e-21	-3.06406	7.41647e-63	3.77091e-62	-2.80153	5.79775e-49	1.02062e-47	-4.5308	7.4086e-57	8.98226e-56	-0.600557	0.00257903	0.00533829	-1.89901	1.86146e-21	2.676e-20	-2.25461	1.39331e-35	2.365e-34	-3.08763	5.78748e-35	1.22552e-33	chrII	748061	749371	1311	-	NA	NA	TFIID-dominated	NA	NA	TFIID
YBR274W	-1.7928	1.49964e-23	4.06403e-23	-3.08103	3.59668e-61	1.71555e-60	-2.72637	1.31241e-41	8.70653e-41	-4.59067	1.21738e-51	8.24758e-51	-0.880857	0.00176228	0.00383657	-1.96009	2.46752e-12	9.06743e-12	-2.17549	2.59478e-30	2.3328e-29	-3.0801	1.12722e-23	6.52906e-23	chrII	749594	751177	1584	+	NA	NA	TFIID-dominated	NA	NA	TFIID
YBR275C	-1.89627	1.19609e-44	1.09387e-43	-2.59938	8.89215e-79	8.738e-78	-2.78879	9.16927e-37	3.49025e-36	-4.57567	9.78681e-56	1.06408e-54	-0.863449	1.06561e-07	7.97944e-07	-0.674421	2.69157e-05	4.52584e-05	-1.67228	2.90652e-23	1.21518e-22	-1.73398	4.75588e-15	1.30547e-14	chrII	751356	757106	5751	-	TATA-less	1_mis	TFIID-dominated	TAF1-enriched	NA	TFIID
YBR276C	-1.92168	1.61019e-39	1.0849e-38	-2.82712	1.20998e-78	1.1873e-77	-2.65248	2.90137e-36	1.05187e-35	-4.19883	1.29946e-44	4.38423e-44	-0.814299	3.48291e-06	1.72085e-05	-1.11027	8.68662e-11	2.6293e-10	-1.51564	3.34917e-21	1.19747e-20	-1.41092	2.03504e-11	4.45238e-11	chrII	757620	760043	2424	-	NA	NA	TFIID-dominated	NA	NA	TFIID
YBR278W	-2.45569	4.17765e-18	8.45016e-18	-3.03982	2.27145e-24	3.63167e-24	-2.97635	1.26925e-27	2.36075e-27	-5.01838	2.76863e-28	4.48961e-28	-1.17339	0.00100248	0.00234457	-2.25619	2.40903e-10	6.88098e-10	-2.43449	2.61887e-15	6.09201e-15	-3.36141	4.34153e-17	1.39692e-16	chrII	760294	760899	606	+	NA	NA	TFIID-dominated	NA	NA	TFIID
YBR279W	-1.1889	6.2791e-16	1.14088e-15	-2.01137	2.04394e-41	4.90361e-41	-2.16398	4.31095e-24	6.8548e-24	-3.67315	6.68019e-45	2.30574e-44	-0.601979	0.00173171	0.00377547	-1.24199	6.82296e-11	2.09624e-10	-1.83246	8.69205e-21	3.00875e-20	-3.11818	5.93078e-37	1.5597e-35	chrII	761257	762594	1338	+	TATA-less	2_mis	TFIID-dominated	TAF1-enriched	NA	TFIID
YBR280C	-3.29875	3.84732e-35	2.02368e-34	-5.13729	4.32218e-65	2.44199e-64	-3.21611	3.07446e-54	9.86621e-53	-4.42386	1.6005e-49	8.53556e-49	-1.46569	0.000141822	0.000431784	-2.26106	1.09407e-09	2.90083e-09	-2.7306	2.12821e-30	1.94011e-29	-3.37259	4.44966e-23	2.41839e-22	chrII	762784	764697	1914	-	NA	NA	TFIID-dominated	NA	NA	TFIID
YBR281C	-1.14092	5.61338e-13	8.954e-13	-2.98262	6.35058e-77	5.76936e-76	-2.01192	7.93901e-21	1.15453e-20	-3.83608	1.19618e-42	3.49067e-42	-0.188208	0.266289	0.322509	-1.34489	4.39166e-16	2.69473e-15	-1.36883	6.11951e-18	1.68869e-17	-2.15621	4.22158e-22	2.10337e-21	chrII	764970	767606	2637	-	TATA-less	1_mis	TFIID-dominated	TAF1-enriched	NA	TFIID
YBR282W	-1.57696	1.80941e-15	3.21855e-15	-3.06632	1.88967e-47	5.48045e-47	-2.38457	3.3083e-26	5.73353e-26	-4.27604	7.09971e-33	1.29175e-32	-0.625559	0.0187319	0.0304254	-1.5789	5.08897e-09	1.2528e-08	-1.96515	2.92817e-15	6.79937e-15	-2.95514	2.27951e-15	6.41648e-15	chrII	768240	768680	441	+	TATA-less	1_mis	TFIID-dominated	TAF1-depleted	NA	TFIID
YBR283C	-2.131	6.63132e-50	7.85565e-49	-3.05711	6.26834e-99	1.61634e-97	-2.78776	3.76495e-44	3.43092e-43	-3.79541	6.68672e-49	3.34634e-48	-0.555083	1.31441e-05	5.47336e-05	-0.743531	3.0665e-09	7.72649e-09	-0.918831	3.21269e-06	4.9075e-06	-0.859663	6.53744e-05	0.000100276	chrII	768943	770415	1473	-	TATA-less	1_mis	TFIID-dominated	TAF1-depleted	NA	TFIID
YBR286W	-2.38787	4.44111e-63	9.28706e-62	-2.23371	4.60282e-55	1.73752e-54	-1.77227	2.08486e-20	2.99875e-20	-4.45342	1.15449e-64	3.61974e-63	-0.243408	0.0184372	0.0300205	-0.257368	0.011888	0.0163052	-0.11016	0.538856	0.599465	-0.347892	0.0592348	0.0752198	chrII	774700	776313	1614	+	TATA-containing	0_mis	SAGA-dominated	TAF1-depleted	NA	CR
YBR288C	-1.62707	7.76145e-19	1.63039e-18	-2.33959	2.4313e-36	5.04272e-36	-2.2381	1.65726e-24	2.6636e-24	-3.88559	7.25158e-50	4.03991e-49	-0.504666	0.00365585	0.00724304	-1.27698	1.37426e-13	5.98472e-13	-1.4685	9.10993e-18	2.48862e-17	-2.11284	2.85737e-19	1.10467e-18	chrII	778012	779463	1452	-	NA	NA	TFIID-dominated	NA	NA	TFIID
YBR289W	-1.42165	4.06619e-16	7.43932e-16	-1.89443	4.20706e-27	7.06741e-27	-2.29927	8.4515e-30	1.78196e-29	-3.69382	1.32931e-41	3.62201e-41	-0.526918	0.00533977	0.0100842	-0.793311	1.34801e-05	2.32525e-05	-1.76359	3.65753e-22	1.4098e-21	-2.28135	1.78484e-18	6.47428e-18	chrII	779667	782384	2718	+	TATA-less	1_mis	TFIID-dominated	TAF1-enriched	NA	TFIID
YBR290W	-1.19516	1.11107e-10	1.63748e-10	-2.1032	3.05037e-28	5.24636e-28	-1.92072	4.9192e-18	6.78312e-18	-3.5851	2.67909e-33	4.93167e-33	-0.993484	0.000117155	0.000366329	-1.25355	4.41688e-07	8.86765e-07	-1.89198	2.60807e-19	8.02237e-19	-2.73567	4.32278e-22	2.15051e-21	chrII	782591	783556	966	+	TATA-containing	0_mis	TFIID-dominated	TAF1-enriched	NA	TFIID
YBR291C	-2.64498	3.12062e-25	9.29412e-25	-2.63779	3.71509e-22	5.7534e-22	-2.713	5.75332e-30	1.22695e-29	-4.10804	2.09181e-20	3.01818e-20	-1.4094	0.000700193	0.00172269	-1.7529	1.1921e-05	2.06722e-05	-2.27281	4.19378e-13	8.66955e-13	-2.3381	1.36985e-07	2.40813e-07	chrII	783673	784572	900	-	TATA-less	1_mis	TFIID-dominated	TAF1-enriched	NA	NA
YBR293W	-1.57956	1.81832e-16	3.38449e-16	-2.80577	6.49026e-45	1.7288e-44	-2.60694	1.25341e-36	4.70167e-36	-3.79125	9.18604e-36	1.84131e-35	-0.451894	0.124384	0.16409	-1.62646	3.26366e-08	7.33594e-08	-2.23146	2.25097e-25	1.15163e-24	-2.15395	1.3081e-12	3.07329e-12	chrII	787006	788430	1425	+	TATA-less	2_mis	TFIID-dominated	TAF1-enriched	NA	TFIID
YBR294W	-1.90421	0.00948481	0.01176	-3.58903	8.25516e-07	1.06014e-06	-2.7108	8.04736e-21	1.16978e-20	-3.28666	0.000979076	0.00120437	-0.552773	0.351202	0.410452	-0.936644	0.118818	0.148488	-2.11121	4.18476e-06	6.36107e-06	-1.70772	0.115015	0.141506	chrII	789235	791814	2580	+	NA	NA	TFIID-dominated	NA	NA	NA
YBR295W	-2.36013	3.61322e-36	2.01161e-35	-3.32792	3.0666e-66	1.81483e-65	-2.84004	7.93353e-45	7.94182e-44	-4.46148	6.11343e-57	7.50648e-56	-1.47329	7.57706e-10	9.90454e-09	-2.04212	3.7668e-19	3.72748e-18	-2.26465	5.05037e-38	1.17565e-36	-2.96116	4.4712e-34	8.50179e-33	chrII	792849	796499	3651	+	TATA-containing	0_mis	TFIID-dominated	TAF1-enriched	NA	TFIID
YBR296C	-3.71689	5.31963e-29	1.98625e-28	-2.72743	5.03612e-20	7.56024e-20	-3.05972	2.74528e-55	1.04617e-53	-3.94972	6.00841e-22	8.81643e-22	-1.50686	0.00026299	0.000733128	-1.72587	4.02393e-06	7.30313e-06	-1.71054	4.65548e-27	2.85999e-26	-0.883571	0.0165582	0.0220663	chrII	796798	798522	1725	-	TATA-containing	0_mis	nocall	TAF1-depleted	NA	CR
YBR297W	-0.953113	0.00014229	0.000183591	-1.81692	1.37488e-12	1.87482e-12	-1.58913	1.91661e-11	2.46353e-11	-2.82565	3.10649e-15	4.24849e-15	-0.29059	0.45638	0.515345	-1.0095	0.00719545	0.010046	-1.22788	5.70694e-06	8.63861e-06	-2.10867	3.79105e-07	6.50835e-07	chrII	800523	801929	1407	+	TATA-less	2_mis	nocall	TAF1-enriched	NA	NA
YBR298C	-1.45314	3.16524e-08	4.37004e-08	-2.63641	2.0332e-23	3.21034e-23	-1.5067	6.12846e-12	7.90454e-12	-2.92302	4.65512e-19	6.59385e-19	-0.284989	0.480316	0.53823	-1.17706	0.00221778	0.00321938	-1.04286	3.08546e-05	4.52662e-05	-1.93856	1.96208e-08	3.59357e-08	chrII	802631	804475	1845	-	TATA-containing	0_mis	TFIID-dominated	TAF1-enriched	NA	CR
YBR299W	-1.66294	0.0036393	0.0045576	-2.7276	4.7377e-06	6.04012e-06	-1.94216	0.000201771	0.000242697	-3.30862	0.000258555	0.000320626	0.367563	0.53981	0.595028	-0.947517	0.111726	0.14	-0.654018	0.413672	0.47056	-1.6041	0.124474	0.152713	chrII	805351	807105	1755	+	NA	NA	nocall	NA	NA	NA
YCL001W	-2.74037	8.77249e-34	4.27651e-33	-3.36563	2.71507e-47	7.82793e-47	-2.90544	2.9991e-43	2.40322e-42	-4.4695	3.78312e-43	1.14359e-42	-1.32214	2.3247e-11	4.16024e-10	-1.80748	1.37575e-20	1.72721e-19	-1.50263	1.98042e-18	5.7142e-18	-2.21737	3.74592e-23	2.06342e-22	chrIII	111916	112482	567	+	TATA-less	1_mis	TFIID-dominated	TAF1-enriched	NA	TFIID
YCL004W	-1.90011	6.78463e-22	1.67034e-21	-2.81884	3.77252e-43	9.55529e-43	-2.77047	8.54735e-35	2.66762e-34	-3.82607	2.4524e-27	3.89897e-27	-0.933343	0.00335562	0.00673476	-1.26529	3.26434e-05	5.45112e-05	-2.20013	2.66077e-09	4.62477e-09	-1.80521	0.00230087	0.00324179	chrIII	109105	110670	1566	+	NA	NA	TFIID-dominated	NA	NA	TFIID
YCL005W	-2.00094	1.29693e-20	2.99617e-20	-2.31098	2.32585e-25	3.78302e-25	-2.54254	1.94533e-27	3.58345e-27	-4.00137	1.05147e-30	1.80264e-30	-0.926841	0.00258956	0.00535638	-1.74736	5.51157e-09	1.3548e-08	-1.83337	8.6551e-07	1.34897e-06	-2.43384	1.76752e-06	2.94527e-06	chrIII	108021	108791	771	+	TATA-less	1_mis	TFIID-dominated	TAF1-enriched	NA	TFIID
YCL005W-A	-2.51732	5.44931e-31	2.27215e-30	-3.08652	3.30254e-42	8.11613e-42	-2.49185	1.11534e-17	1.53133e-17	-3.80329	3.2513e-24	4.91523e-24	-0.558773	0.000362244	0.0009698	-0.541875	0.000351812	0.000543121	-0.57516	0.0191238	0.0245905	-1.05445	1.85178e-06	3.0833e-06	chrIII	107023	107417	395	+	NA	NA	NA	NA	NA	TFIID
YCL008C	-1.86233	1.41035e-21	3.40202e-21	-2.41821	1.53446e-33	2.98578e-33	-2.98252	2.89251e-25	4.79762e-25	-3.77581	1.19817e-10	1.58246e-10	-0.447549	0.0552302	0.0794115	-1.67663	6.8302e-13	2.70111e-12	-1.93447	0.000241751	0.000341067	-2.6838	0.000969574	0.00139778	chrIII	105696	106853	1158	-	TATA-less	1_mis	TFIID-dominated	TAF1-depleted	NA	TFIID
YCL009C	-1.81351	2.09079e-27	7.06123e-27	-1.95313	2.92738e-31	5.40482e-31	-2.09004	2.70443e-20	3.88407e-20	-3.24413	6.70337e-18	9.37304e-18	0.125041	0.237127	0.290752	0.0315526	0.760974	0.80089	-0.686582	0.0114606	0.0149132	-0.284987	0.452498	0.508475	chrIII	104619	105548	930	-	TATA-less	1_mis	TFIID-dominated	TAF1-enriched	NA	TFIID
YCL010C	-1.98488	2.82467e-23	7.56518e-23	-2.906	5.34841e-45	1.42798e-44	-2.65156	1.12823e-38	5.29166e-38	-4.07122	2.17296e-49	1.14348e-48	-0.906956	0.000401679	0.00106028	-1.53241	1.08043e-09	2.86777e-09	-2.42256	2.00944e-37	4.29427e-36	-2.83981	5.19582e-27	4.3004e-26	chrIII	103571	104350	780	-	TATA-less	2_mis	TFIID-dominated	TAF1-enriched	NA	TFIID
YCL011C	-1.61189	2.29101e-19	4.94153e-19	-2.85681	2.01976e-55	7.74374e-55	-2.35136	9.92996e-31	2.21779e-30	-3.61259	8.7211e-49	4.3132e-48	-0.452967	0.000879345	0.00209489	-0.732425	3.97994e-08	8.86676e-08	-1.07166	1.162e-11	2.23419e-11	-1.05799	6.87662e-08	1.2301e-07	chrIII	102075	103358	1284	-	TATA-less	1_mis	TFIID-dominated	TAF1-enriched	NA	TFIID
YCL012C	-2.12763	2.49396e-12	3.89128e-12	-2.21327	3.7416e-12	5.0809e-12	-2.71828	4.56427e-21	6.68543e-21	-3.64984	2.08549e-14	2.83318e-14	-0.586551	0.0754489	0.105066	-1.49066	1.45772e-05	2.50788e-05	-1.45443	0.000202274	0.000286053	-1.66879	0.000665442	0.000968321	chrIII	101317	101788	472	-	NA	NA	NA	NA	NA	TFIID
YCL014W	-2.32747	1.09829e-51	1.38989e-50	-2.62363	1.72306e-63	9.00111e-63	-2.41442	1.31353e-27	2.44107e-27	-4.00223	2.14942e-48	1.02253e-47	-0.619273	5.00183e-05	0.000174152	-0.657681	1.064e-05	1.85492e-05	-1.07456	9.69013e-07	1.50741e-06	-1.15568	4.38396e-05	6.78827e-05	chrIII	96281	101191	4911	+	TATA-less	1_mis	TFIID-dominated	TAF1-enriched	NA	TFIID
YCL016C	-1.5041	8.14899e-14	1.34328e-13	-2.20303	5.19134e-26	8.53077e-26	-2.72619	3.03886e-37	1.21827e-36	-3.87337	8.06384e-34	1.51374e-33	-0.597788	0.0277772	0.0432258	-1.68434	8.67145e-10	2.32441e-09	-2.32698	1.66306e-19	5.18157e-19	-2.80738	5.01862e-16	1.47838e-15	chrIII	94621	95763	1143	-	TATA-less	1_mis	TFIID-dominated	TAF1-enriched	NA	TFIID
YCL017C	-1.5191	2.32729e-25	7.00433e-25	-2.20251	1.22256e-50	3.98933e-50	-2.24621	6.69247e-32	1.64299e-31	-3.43607	2.66834e-41	7.14585e-41	-0.37523	0.00760321	0.0137127	-1.18602	5.06565e-18	4.15218e-17	-1.2354	4.90054e-15	1.12234e-14	-1.3323	5.21359e-11	1.11742e-10	chrIII	92777	94270	1494	-	TATA-less	1_mis	TFIID-dominated	TAF1-enriched	NA	TFIID
YCL024W	-1.30953	5.76225e-17	1.10185e-16	-1.65412	9.90797e-25	1.59154e-24	-2.22335	9.72044e-25	1.57666e-24	-4.12652	9.57898e-44	3.00474e-43	-0.589679	0.0067071	0.0122732	-0.909261	3.89253e-05	6.46548e-05	-1.6265	1.79981e-18	5.21385e-18	-2.26485	3.61255e-19	1.38026e-18	chrIII	79162	82275	3114	+	TATA-less	1_mis	TFIID-dominated	TAF1-enriched	NA	TFIID
YCL025C	-3.22098	4.32439e-36	2.39588e-35	-3.68839	3.68124e-46	1.01895e-45	-3.03473	4.66011e-40	2.54938e-39	-5.41333	5.31367e-62	1.23943e-60	-1.7617	1.90465e-09	2.24122e-08	-2.33573	1.97576e-17	1.49751e-16	-2.45346	2.12656e-18	6.11692e-18	-3.66532	7.46086e-22	3.65588e-21	chrIII	76018	77919	1902	-	TATA-containing	0_mis	SAGA-dominated	TAF1-depleted	NA	CR
YCL026C-A	-1.79998	5.58537e-06	7.38578e-06	-9.29598	2.42062e-91	4.47521e-90	-2.91384	3.24694e-56	1.47143e-54	-4.88112	3.32535e-68	1.56756e-66	-0.105083	0.861284	0.882115	-2.3426	9.69934e-05	0.000156034	-2.94054	1.5121e-57	3.17931e-55	-4.80073	1.38141e-55	1.66844e-53	chrIII	74704	75285	582	-	NA	NA	NA	NA	NA	CR
YCL026C-B	-3.05458	2.3116e-25	6.96323e-25	-8.95423	3.43766e-209	2.35789e-206	-3.07993	2.64708e-61	2.61087e-59	-4.12712	5.21922e-60	9.69222e-59	-0.245408	0.664072	0.71013	-3.02279	8.24268e-08	1.77587e-07	-2.95958	1.53293e-53	2.03912e-51	-4.10249	1.27107e-58	1.86798e-56	chrIII	73405	73986	582	-	NA	NA	NA	NA	NA	CR
YCL027W	-1.95323	5.94704e-33	2.75427e-32	-2.06918	1.38531e-36	2.89425e-36	-2.97098	3.70249e-37	1.46678e-36	-4.39293	2.68982e-48	1.26444e-47	-0.976036	1.57946e-05	6.38687e-05	-1.82976	1.86651e-16	1.22456e-15	-2.36193	1.08577e-21	4.04636e-21	-3.35516	1.85949e-23	1.05733e-22	chrIII	71803	73341	1539	+	TATA-less	1_mis	SAGA-dominated	TAF1-depleted	NA	CR
YCL028W	-1.92692	1.55437e-26	5.00302e-26	-2.90538	1.13586e-54	4.23645e-54	-2.59468	7.67596e-38	3.29384e-37	-3.89981	3.48855e-36	7.13264e-36	-0.124873	0.372279	0.432062	-0.525342	0.000139813	0.000221647	-0.354438	0.0818449	0.10094	-0.792634	0.000172107	0.000258815	chrIII	70150	71367	1218	+	NA	NA	TFIID-dominated	NA	NA	TFIID
YCL029C	-1.57112	1.708e-13	2.78139e-13	-2.44958	2.50794e-28	4.32862e-28	-2.26762	1.98989e-26	3.48647e-26	-2.911	5.90978e-25	9.03147e-25	-0.718777	0.00400221	0.00783121	-1.80536	7.51316e-13	2.95512e-12	-2.13294	7.44528e-16	1.78151e-15	-2.06779	5.62837e-09	1.06617e-08	chrIII	68599	69921	1323	-	TATA-less	2_mis	TFIID-dominated	TAF1-enriched	NA	TFIID
YCL030C	-1.71466	4.39438e-23	1.16735e-22	-1.56025	9.81886e-20	1.46791e-19	-1.82321	7.45965e-19	1.04038e-18	-3.13527	2.81494e-37	6.04702e-37	-0.105339	0.429846	0.489706	-0.14365	0.242975	0.290601	-0.574168	0.000157474	0.000223962	-0.439964	0.0151884	0.0203072	chrIII	65934	68333	2400	-	TATA-less	1_mis	SAGA-dominated	TAF1-depleted	NA	CR
YCL031C	-1.15876	1.56533e-13	2.5533e-13	-1.61924	2.13801e-24	3.42072e-24	-1.97357	8.64526e-21	1.2556e-20	-3.50048	4.07607e-41	1.07583e-40	-0.349344	0.0350056	0.0531402	-1.06765	1.54922e-10	4.55436e-10	-1.66932	8.71613e-24	3.83604e-23	-2.43255	6.29336e-26	4.70703e-25	chrIII	64675	65568	894	-	TATA-less	2_mis	TFIID-dominated	TAF1-enriched	NA	TFIID
YCL032W	-1.42429	9.49614e-10	1.3615e-09	-3.06136	1.13495e-34	2.26562e-34	-2.49973	9.39343e-30	1.97188e-29	-4.44199	1.24195e-37	2.70587e-37	-0.460193	0.107729	0.144271	-1.70937	2.47407e-09	6.29195e-09	-2.21094	4.49529e-17	1.16271e-16	-3.47369	4.17773e-18	1.46964e-17	chrIII	63441	64481	1041	+	TATA-less	1_mis	TFIID-dominated	TAF1-enriched	NA	TFIID
YCL033C	-2.51213	4.7786e-18	9.65147e-18	-3.07596	7.88475e-22	1.2145e-21	-2.86208	1.69892e-28	3.31144e-28	-4.50314	1.98356e-20	2.8626e-20	-0.517293	0.0424924	0.0630104	-0.890248	0.000356767	0.000550122	-0.749977	5.72963e-05	8.33052e-05	-0.890722	0.000154766	0.000233167	chrIII	62776	63282	507	-	NA	NA	TFIID-dominated	NA	NA	NA
YCL034W	-1.76373	9.10129e-23	2.36372e-22	-2.61391	3.69438e-46	1.02218e-45	-2.5164	1.98408e-38	9.07106e-38	-3.88269	7.89543e-41	2.05099e-40	-0.420258	0.0230596	0.0366431	-1.49798	1.06106e-16	7.17721e-16	-1.97081	2.25798e-24	1.04975e-23	-2.55341	1.80577e-27	1.57449e-26	chrIII	61658	62722	1065	+	TATA-containing	0_mis	TFIID-dominated	TAF1-enriched	NA	TFIID
YCL035C	-2.19602	1.45031e-26	4.68347e-26	-3.29265	1.24901e-52	4.35756e-52	-2.38139	3.39204e-27	6.16208e-27	-4.16846	3.10301e-32	5.52931e-32	-0.420062	0.0100207	0.0174347	-0.771255	1.17832e-06	2.25825e-06	-0.665558	5.33046e-05	7.75881e-05	-1.04042	2.38853e-07	4.14087e-07	chrIII	60841	61173	333	-	TATA-containing	0_mis	SAGA-dominated	TAF1-depleted	NA	TFIID
YCL036W	-2.26411	2.53728e-07	3.43733e-07	-1.23376	0.00529187	0.00643113	-2.66789	7.66337e-39	3.66345e-38	-3.50375	6.28094e-29	1.03369e-28	-1.28293	1.89176e-06	9.97818e-06	-0.468644	0.0860878	0.10934	-1.70095	5.35438e-16	1.29643e-15	-0.850243	0.00210059	0.00296924	chrIII	59026	60726	1701	+	TATA-less	1_mis	TFIID-dominated	TAF1-enriched	NA	NA
YCL037C	-1.56701	4.26892e-17	8.21564e-17	-1.4703	4.0633e-15	5.68431e-15	-2.44293	2.0137e-32	5.18261e-32	-1.08647	0.00207279	0.00253772	0.263316	0.057384	0.0821939	0.546206	7.89681e-05	0.000127981	-0.886944	0.00815982	0.0107057	-0.567558	0.189728	0.227375	chrIII	57374	58678	1305	-	TATA-less	2_mis	TFIID-dominated	TAF1-enriched	NA	TFIID
YCL038C	-1.59667	3.10273e-17	6.00498e-17	-2.51621	1.18348e-36	2.47939e-36	-2.53775	4.63528e-30	9.93571e-30	-3.4723	6.85079e-26	1.06261e-25	-0.219743	0.386251	0.44664	-0.522371	0.0376495	0.0494906	-1.64163	6.85741e-14	1.48198e-13	-1.66198	1.70928e-06	2.85113e-06	chrIII	54941	56527	1587	-	TATA-less	2_mis	TFIID-dominated	TAF1-enriched	NA	TFIID
YCL039W	-0.823047	4.41421e-06	5.84387e-06	-1.82648	1.60874e-23	2.54248e-23	-1.98357	1.17014e-17	1.60624e-17	-2.17554	2.13465e-06	2.71811e-06	0.371243	0.0729025	0.101874	-0.653507	0.00131842	0.00195065	-1.9239	3.50347e-08	5.82095e-08	-1.43723	0.0217319	0.0287088	chrIII	52645	54882	2238	+	TATA-less	1_mis	nocall	TAF1-enriched	NA	TFIID
YCL040W	-2.952	4.26841e-63	8.98069e-62	-4.55646	1.92088e-143	2.58339e-141	-2.82993	1.6707e-39	8.54719e-39	-5.00578	6.30934e-76	7.59487e-74	-0.776006	2.09367e-07	1.46557e-06	-1.822	4.70985e-35	3.31259e-33	-1.60717	5.45046e-24	2.44333e-23	-2.41759	5.00162e-39	1.63103e-37	chrIII	50838	52340	1503	+	TATA-containing	0_mis	SAGA-dominated	TAF1-depleted	NA	CR
YCL043C	-3.07299	1.16906e-74	3.96959e-73	-3.36601	7.72049e-89	1.25189e-87	-3.15427	8.41504e-55	2.98623e-53	-3.8705	7.71269e-35	1.49701e-34	-0.620395	2.12084e-09	2.46189e-08	-0.840915	2.61639e-16	1.66964e-15	-0.954409	1.99131e-07	3.18982e-07	-0.536996	0.00597911	0.00822002	chrIII	48653	50221	1569	-	TATA-containing	0_mis	TFIID-dominated	TAF1-enriched	NA	CR
YCL044C	-1.22529	7.37209e-12	1.12818e-11	-2.32443	3.79157e-37	8.04154e-37	-3.36557	7.74444e-25	1.26042e-24	-4.34449	2.80836e-11	3.72734e-11	-0.354331	0.13177	0.172772	-1.25048	8.6705e-08	1.86558e-07	-2.59364	0.000474181	0.000659562	-1.68946	0.142979	0.174235	chrIII	47111	48364	1254	-	TATA-less	2_mis	TFIID-dominated	TAF1-enriched	NA	TFIID
YCL045C	-1.98536	1.5578e-35	8.30866e-35	-2.49044	2.78375e-54	1.0271e-53	-2.42697	2.28622e-29	4.68775e-29	-3.78856	4.76812e-44	1.53715e-43	-0.349703	0.00988803	0.0172338	-0.849086	2.29387e-10	6.57501e-10	-0.814181	9.91144e-07	1.5411e-06	-1.02398	3.20637e-07	5.52349e-07	chrIII	44623	46905	2283	-	TATA-containing	0_mis	TFIID-dominated	TAF1-enriched	NA	TFIID
YCL047C	-3.09247	1.21041e-40	8.7208e-40	-4.54764	2.15972e-68	1.40147e-67	-3.3812	1.00615e-52	2.64637e-51	-5.35767	6.43313e-40	1.58038e-39	-1.45196	7.76575e-06	3.47991e-05	-2.55114	2.15603e-15	1.19311e-14	-3.04623	6.30816e-41	2.0456e-39	-4.2137	1.13378e-29	1.2533e-28	chrIII	43661	44437	777	-	TATA-less	1_mis	TFIID-dominated	TAF1-enriched	NA	NA
YCL050C	-1.86807	3.31401e-34	1.65918e-33	-2.69868	1.42125e-68	9.31073e-68	-2.25621	2.72898e-29	5.58027e-29	-3.65733	7.58033e-40	1.85545e-39	-0.129725	0.299242	0.356729	-0.671262	3.74884e-08	8.36899e-08	-0.838747	3.53797e-05	5.1833e-05	-1.2923	4.53312e-06	7.38572e-06	chrIII	37836	38801	966	-	TATA-less	2_mis	TFIID-dominated	TAF1-enriched	NA	TFIID
YCL051W	-1.29431	1.03865e-13	1.70474e-13	-2.05551	2.11417e-31	3.91393e-31	-2.15683	1.71766e-25	2.87506e-25	-3.31637	7.09136e-29	1.16564e-28	-0.579114	0.00776852	0.0139606	-1.33541	4.76339e-10	1.31466e-09	-1.76258	1.85868e-19	5.78275e-19	-2.10902	1.09666e-18	4.04549e-18	chrIII	35865	37616	1752	+	TATA-less	2_mis	TFIID-dominated	TAF1-enriched	NA	TFIID
YCL052C	-1.76725	1.16376e-28	4.25267e-28	-3.12504	1.45782e-81	1.61018e-80	-2.5799	7.89313e-41	4.7693e-40	-4.31376	1.81051e-55	1.93112e-54	-1.02333	7.29365e-08	5.70308e-07	-2.18879	8.47527e-31	3.82322e-29	-2.1839	3.4508e-34	4.82667e-33	-3.46434	6.99409e-44	3.62027e-42	chrIII	34143	35393	1251	-	NA	NA	TFIID-dominated	NA	NA	TFIID
YCL054W	-1.17704	1.29976e-10	1.9131e-10	-1.49397	6.61811e-16	9.3653e-16	-1.98129	9.68662e-18	1.33077e-17	-2.81335	1.76561e-29	2.93803e-29	-0.140943	0.402944	0.463155	0.265223	0.119012	0.148674	-0.932998	1.8943e-09	3.31287e-09	-0.277362	0.206581	0.246672	chrIII	31449	33974	2526	+	TATA-less	1_mis	TFIID-dominated	TAF1-enriched	NA	TFIID
YCL055W	-1.72364	1.16097e-33	5.59208e-33	-2.24832	1.56419e-54	5.80247e-54	-2.8049	5.67493e-42	3.8918e-41	-4.09406	3.9004e-56	4.44132e-55	-0.771864	3.51085e-05	0.000128567	-1.55937	1.1946e-17	9.29121e-17	-2.31538	1.49365e-35	2.52217e-34	-3.12933	1.0328e-33	1.84042e-32	chrIII	27929	28936	1008	+	TATA-less	1_mis	SAGA-dominated	TAF1-depleted	NA	CR
YCL056C	-1.45382	0.000404892	0.00051774	-3.11683	4.9145e-12	6.66704e-12	-3.06622	1.20091e-25	2.02477e-25	-4.64961	8.61997e-21	1.24801e-20	-1.23404	0.00655141	0.0120286	-1.63178	0.000276124	0.000429724	-2.32126	3.09972e-11	5.85113e-11	-2.03553	6.10934e-05	9.38636e-05	chrIII	26925	27359	435	-	TATA-less	2_mis	TFIID-dominated	TAF1-depleted	NA	TFIID
YCL057C-A	-2.31003	1.5802e-23	4.2722e-23	-2.29843	8.72829e-20	1.30572e-19	-2.63853	1.25389e-19	1.7776e-19	-4.34684	3.98336e-16	5.4923e-16	-1.26008	3.08744e-07	2.06046e-06	-1.0526	1.2209e-05	2.1138e-05	-1.7112	8.70468e-07	1.35637e-06	-1.80099	0.000103236	0.000156728	chrIII	24032	24325	294	-	TATA-less	1_mis	NA	TAF1-enriched	NA	TFIID
YCL057W	-1.573	1.14392e-30	4.67868e-30	-2.92785	1.20443e-100	3.41372e-99	-2.63554	2.10588e-35	6.96112e-35	-4.01174	5.07473e-55	5.12107e-54	-0.190724	0.102287	0.137659	-0.86069	4.89321e-14	2.27158e-13	-1.12558	0.00481493	0.0063905	-1.03319	1.59119e-05	2.52746e-05	chrIII	24768	26906	2139	+	TATA-less	1_mis	TFIID-dominated	TAF1-enriched	NA	TFIID
YCL058W-A	-2.29003	3.09577e-06	4.1119e-06	-1.76073	0.00112898	0.00139175	-2.75142	2.4062e-20	3.45872e-20	-4.34971	8.28459e-14	1.11782e-13	-1.01585	0.0344134	0.0523471	-0.688393	0.164892	0.202394	-2.41268	2.51072e-07	4.00021e-07	-3.27164	2.80992e-05	4.40431e-05	chrIII	23584	23925	342	+	TATA-less	1_mis	NA	TAF1-enriched	NA	TFIID
YCL059C	-1.74275	1.36741e-19	2.98601e-19	-1.69268	5.43354e-18	7.91434e-18	-2.34138	1.13281e-25	1.91284e-25	-3.83602	2.6543e-43	8.09254e-43	-0.421839	0.0140374	0.0235444	-0.791454	3.75449e-06	6.82929e-06	-0.975929	4.45442e-11	8.3359e-11	-1.30722	1.28003e-10	2.66295e-10	chrIII	22429	23379	951	-	TATA-less	1_mis	TFIID-dominated	TAF1-depleted	NA	TFIID
YCL061C	-1.60174	5.17317e-26	1.62392e-25	-2.77543	1.90752e-70	1.34467e-69	-2.65863	5.93229e-30	1.26471e-29	-4.3555	1.66997e-54	1.56786e-53	-0.827389	2.09146e-05	8.13452e-05	-0.998458	1.97178e-07	4.08794e-07	-1.83868	1.05461e-25	5.57949e-25	-2.07434	2.46106e-17	8.09433e-17	chrIII	18816	22106	3291	-	TATA-less	2_mis	TFIID-dominated	TAF1-enriched	NA	TFIID
YCL063W	-2.37622	7.03629e-37	4.10391e-36	-2.49106	4.42812e-39	9.9224e-39	-2.84552	3.31913e-36	1.19364e-35	-4.40619	4.73946e-10	6.22903e-10	-1.16937	1.6409e-06	8.79388e-06	-1.95354	7.85119e-16	4.61822e-15	-2.39287	2.90833e-16	7.16963e-16	-3.29625	4.42201e-12	1.0021e-11	chrIII	17290	18561	1272	+	TATA-less	1_mis	TFIID-dominated	TAF1-enriched	NA	TFIID
YCL064C	-3.57684	4.08461e-80	1.75102e-78	-3.90113	7.91279e-95	1.71753e-93	-2.97025	6.8377e-46	7.63069e-45	-5.37687	5.21723e-87	2.70534e-84	-1.81038	3.64786e-08	3.11571e-07	-1.87227	8.94744e-09	2.14457e-08	-2.22278	3.53223e-36	6.46716e-35	-3.46955	1.33294e-56	1.77417e-54	chrIII	15798	16880	1083	-	TATA-containing	0_mis	TFIID-dominated	TAF1-depleted	NA	CR
YCR002C	-1.74397	8.15576e-32	3.54502e-31	-2.91712	2.09441e-82	2.41033e-81	-2.30634	7.00613e-27	1.2514e-26	-3.45832	6.26112e-36	1.26593e-35	-0.743393	4.19242e-06	2.02157e-05	-1.5965	6.73661e-24	1.39886e-22	-1.72685	5.85184e-24	2.61249e-23	-1.91219	2.72688e-16	8.24131e-16	chrIII	117380	118348	969	-	TATA-less	1_mis	TFIID-dominated	TAF1-enriched	NA	TFIID
YCR003W	-1.5058	3.21409e-14	5.40065e-14	-2.85262	8.11068e-43	2.03479e-42	-2.51319	4.40068e-32	1.09886e-31	-4.16966	3.41622e-41	9.08791e-41	-0.547942	0.0290873	0.0450779	-1.863	2.6964e-13	1.12267e-12	-2.20895	2.77625e-28	1.98241e-27	-3.25083	1.27839e-25	9.31582e-25	chrIII	118620	119171	552	+	TATA-less	1_mis	TFIID-dominated	TAF1-enriched	NA	TFIID
YCR004C	-2.43343	1.81825e-52	2.4076e-51	-4.33647	8.14401e-150	1.39649e-147	-3.13578	7.94565e-62	8.32679e-60	-4.10472	1.60113e-57	2.17167e-56	-0.313149	0.0150134	0.0249953	-1.17643	1.12307e-20	1.43477e-19	-1.17059	3.97756e-14	8.70283e-14	-0.971691	1.91887e-07	3.34712e-07	chrIII	119575	120318	744	-	TATA-containing	0_mis	TFIID-dominated	TAF1-enriched	NA	TFIID
YCR005C	-1.44579	6.1678e-14	1.02408e-13	-2.10916	4.60303e-28	7.8773e-28	-1.66995	1.49201e-20	2.15481e-20	-3.61739	5.65954e-49	2.86204e-48	-0.673508	6.3887e-05	0.000216424	-1.75803	6.52489e-28	2.13397e-26	-1.45129	3.25782e-22	1.26095e-21	-2.68751	4.9212e-37	1.31004e-35	chrIII	120946	122328	1383	-	TATA-containing	0_mis	SAGA-dominated	TAF1-depleted	NA	CR
YCR008W	-2.5149	1.97798e-64	4.36236e-63	-3.62026	1.55871e-125	1.14959e-123	-3.1344	5.78003e-56	2.46921e-54	-5.01248	2.68414e-59	4.55763e-58	-0.878944	5.08005e-08	4.17319e-07	-1.59382	3.52611e-23	6.68531e-22	-1.90969	1.92619e-27	1.24306e-26	-1.67655	1.11029e-14	2.98734e-14	chrIII	128470	130281	1812	+	TATA-containing	0_mis	TFIID-dominated	TAF1-depleted	NA	TFIID
YCR009C	-1.83208	1.75418e-31	7.51058e-31	-2.7314	1.18898e-65	6.87622e-65	-2.37587	2.16532e-31	5.085e-31	-3.92798	1.518e-50	9.12017e-50	-0.426774	0.00184768	0.00398783	-1.1683	3.92804e-18	3.28139e-17	-1.1304	5.91795e-12	1.1542e-11	-1.50573	3.91853e-12	8.90786e-12	chrIII	130745	131542	798	-	TATA-less	2_mis	TFIID-dominated	TAF1-enriched	NA	TFIID
YCR010C	-1.70206	0.0294379	0.0358959	-1.67749	0.0397536	0.0467461	-1.68798	0.0108971	0.0127529	-2.42026	0.090786	0.10537	0.384576	0.511264	0.568249	-0.159849	0.787811	0.823964	-0.878584	0.244214	0.286912	-1.37722	0.231843	0.275274	chrIII	132273	133124	852	-	NA	NA	TFIID-dominated	NA	NA	NA
YCR011C	-1.94964	5.17451e-40	3.59959e-39	-3.31232	4.37667e-108	1.79758e-106	-2.62362	7.8785e-39	3.75559e-38	-4.17969	4.87049e-57	6.05755e-56	-0.856505	2.51335e-09	2.89516e-08	-1.61863	1.07933e-29	4.22749e-28	-1.61655	3.3806e-27	2.11061e-26	-1.86654	6.58337e-21	2.95098e-20	chrIII	133724	136873	3150	-	TATA-less	1_mis	TFIID-dominated	TAF1-enriched	NA	TFIID
YCR012W	-3.28129	1.97811e-95	1.67504e-93	-3.44763	5.65237e-105	1.97804e-103	-2.74894	1.65272e-47	2.34848e-46	-4.53661	2.20047e-73	1.87764e-71	-0.420637	0.000336702	0.000908704	-0.635246	5.99851e-08	1.30918e-07	-0.40772	0.00516193	0.00684268	-0.526764	0.0041292	0.0057397	chrIII	137746	138996	1251	+	TATA-containing	0_mis	SAGA-dominated	TAF1-depleted	NA	CR
YCR014C	-1.57342	5.65913e-12	8.69144e-12	-3.38296	1.48756e-42	3.69411e-42	-2.21203	9.23492e-21	1.34008e-20	-3.89324	1.28672e-40	3.29008e-40	-0.926032	0.00238201	0.00498193	-1.52806	6.05319e-07	1.198e-06	-1.60932	6.39902e-15	1.45631e-14	-2.0164	1.47497e-10	3.05971e-10	chrIII	139185	140933	1749	-	NA	NA	TFIID-dominated	NA	NA	TFIID
YCR015C	-2.08216	2.80889e-25	8.42055e-25	-3.49636	1.20173e-59	5.45513e-59	-2.91002	9.29482e-40	4.91256e-39	-4.22427	8.45053e-41	2.19096e-40	-1.27737	8.57692e-06	3.78935e-05	-1.44756	2.6181e-07	5.36162e-07	-2.1144	6.00468e-26	3.24801e-25	-2.32004	8.67679e-17	2.73118e-16	chrIII	141217	142170	954	-	TATA-less	1_mis	TFIID-dominated	TAF1-enriched	NA	TFIID
YCR017C	-1.70061	8.05295e-34	3.93413e-33	-2.7238	4.38071e-82	4.97471e-81	-2.23887	8.34383e-28	1.56625e-27	-3.42361	5.81859e-37	1.23304e-36	-0.61043	4.44396e-06	2.12244e-05	-1.12596	6.2232e-18	5.05037e-17	-0.863368	4.45107e-08	7.36721e-08	-1.10842	9.98768e-09	1.86326e-08	chrIII	144773	147634	2862	-	TATA-less	2_mis	nocall	TAF1-enriched	NA	TFIID
YCR018C	-4.62593	4.77959e-66	1.13831e-64	-3.07341	1.11024e-31	2.06597e-31	-3.79687	3.94028e-68	8.00832e-66	-4.6438	1.39043e-40	3.5423e-40	-2.70736	4.13035e-13	1.00144e-11	-2.37928	1.2459e-12	4.74908e-12	-3.38758	1.57875e-40	4.87691e-39	-3.5677	3.39168e-24	2.0751e-23	chrIII	148238	148903	666	-	NA	NA	nocall	NA	NA	CR
YCR019W	-1.38571	4.43205e-12	6.83595e-12	-3.00316	2.42285e-44	6.35015e-44	-2.30829	1.12959e-25	1.90787e-25	-4.15839	3.08389e-35	6.07319e-35	-0.377209	0.223648	0.276082	-1.64841	8.97015e-08	1.92499e-07	-2.04992	5.97575e-21	2.09521e-20	-2.73724	1.40599e-16	4.35416e-16	chrIII	152837	153928	1092	+	TATA-less	2_mis	nocall	TAF1-enriched	NA	TFIID
YCR020C	-0.79318	0.0149242	0.0184011	-1.27086	0.000336922	0.000419562	-0.664322	0.0176386	0.0205208	-1.4085	0.0181854	0.021697	-0.239045	0.601985	0.652911	0.243078	0.606241	0.659037	-0.539556	0.107562	0.13129	-0.471613	0.42237	0.478246	chrIII	154012	154659	648	-	NA	NA	TFIID-dominated	NA	NA	NA
YCR020C-A	-2.04141	1.2599e-11	1.91314e-11	-2.67458	1.2151e-16	1.73705e-16	-2.32057	1.87804e-16	2.53542e-16	-3.23626	2.86884e-12	3.83711e-12	-0.51417	0.0712177	0.0997513	-0.396029	0.141546	0.175119	-0.533952	0.0245571	0.0313726	-0.608114	0.0215248	0.0284525	chrIII	154830	155096	267	-	NA	NA	TFIID-dominated	NA	NA	TFIID
YCR020W-B	-1.04194	0.000225323	0.000289472	-1.90925	3.84874e-11	5.17414e-11	-2.08103	7.94998e-16	1.06513e-15	-4.00182	6.2655e-27	9.89822e-27	-0.453677	0.186513	0.234969	-1.09457	0.00154703	0.00227601	-2.05422	1.70941e-09	2.99353e-09	-2.81101	2.46375e-14	6.49497e-14	chrIII	155320	155556	237	+	NA	NA	NA	NA	NA	TFIID
YCR021C	0.225184	0.250597	0.288735	-5.04778	7.58999e-120	4.52694e-118	-1.08332	4.81274e-09	6.08006e-09	-4.14371	7.21305e-55	7.16099e-54	1.06154	7.49383e-06	3.37531e-05	-2.79423	1.21033e-31	5.95247e-30	-0.522362	0.000718989	0.000992244	-3.52539	2.65063e-61	4.67227e-59	chrIII	156109	157107	999	-	TATA-containing	0_mis	SAGA-dominated	TAF1-depleted	NA	CR
YCR023C	-1.61739	1.00178e-22	2.5939e-22	-2.82012	9.02527e-63	4.55179e-62	-1.99434	5.95759e-21	8.6921e-21	-3.413	2.34469e-36	4.8217e-36	-0.757567	0.000120577	0.000374885	-1.65969	2.57522e-17	1.91415e-16	-1.64575	9.39758e-16	2.23308e-15	-2.31365	1.09182e-18	4.02991e-18	chrIII	158538	160373	1836	-	TATA-less	1_mis	TFIID-dominated	TAF1-enriched	NA	TFIID
YCR024C	-2.08283	2.36012e-28	8.45329e-28	-4.40033	3.06725e-99	8.06064e-98	-2.63486	3.18502e-37	1.26927e-36	-4.19911	4.02468e-42	1.13707e-41	-1.08626	0.000635915	0.00157616	-2.94885	1.99513e-20	2.45303e-19	-2.23178	1.18257e-19	3.73812e-19	-3.69179	2.86553e-19	1.10586e-18	chrIII	160744	162222	1479	-	NA	NA	TFIID-dominated	NA	NA	TFIID
YCR024C-A	-3.56036	3.32251e-61	6.52983e-60	-3.32621	1.07388e-49	3.3819e-49	-3.05978	1.22472e-42	9.14725e-42	-4.71752	1.42259e-39	3.42001e-39	-1.13713	2.59248e-07	1.77746e-06	-0.89269	4.5524e-05	7.51382e-05	-0.79182	0.00111761	0.00152941	-1.13265	4.26323e-05	6.60603e-05	chrIII	162945	163067	123	-	TATA-containing	0_mis	SAGA-dominated	TAF1-depleted	NA	CR
YCR026C	-1.4271	1.04073e-20	2.40672e-20	-2.39255	7.51693e-53	2.64811e-52	-2.33994	5.44972e-28	1.03457e-27	-3.93371	4.88746e-52	3.46075e-51	-0.869919	2.08671e-06	1.08919e-05	-1.41206	6.36099e-15	3.31004e-14	-1.91685	3.24483e-32	3.63399e-31	-2.75665	2.43946e-29	2.60395e-28	chrIII	164111	166339	2229	-	TATA-containing	0_mis	TFIID-dominated	TAF1-enriched	NA	TFIID
YCR027C	-1.87231	7.65251e-22	1.87996e-21	-3.58799	1.29988e-63	6.83208e-63	-3.25032	1.70931e-46	2.08823e-45	-4.88129	1.03629e-44	3.52986e-44	-1.32668	4.72093e-05	0.000165935	-2.36031	9.54347e-13	3.68935e-12	-3.10576	7.40922e-32	7.94297e-31	-4.55951	4.17583e-28	3.96431e-27	chrIII	167370	167999	630	-	TATA-less	1_mis	TFIID-dominated	TAF1-depleted	NA	TFIID
YCR028C	-1.55824	5.31505e-17	1.01804e-16	-2.634	1.5099e-42	3.74825e-42	-2.28973	2.46269e-29	5.04651e-29	-3.52032	8.40606e-34	1.57622e-33	-0.935263	0.000162124	0.000484037	-1.4255	4.13899e-09	1.02628e-08	-2.10548	1.94742e-27	1.25428e-26	-2.27393	1.80227e-17	6.00021e-17	chrIII	170886	172424	1539	-	TATA-containing	0_mis	TFIID-dominated	TAF1-enriched	NA	TFIID
YCR028C-A	-2.21527	5.26543e-29	1.96815e-28	-3.04733	2.90384e-49	8.96778e-49	-2.51313	1.44455e-29	2.98938e-29	-4.05045	6.48745e-37	1.36919e-36	-0.504633	0.000900968	0.00213456	-0.677053	5.075e-06	9.10465e-06	-0.348492	0.0532885	0.0667309	-0.620283	0.00220047	0.00310705	chrIII	172950	173440	491	-	TATA-less	2_mis	NA	TAF1-enriched	NA	TFIID
YCR030C	-1.45024	3.50519e-18	7.11515e-18	-2.59944	3.30266e-53	1.17861e-52	-2.11262	2.19614e-24	3.51792e-24	-3.53047	2.63932e-33	4.85979e-33	-0.131916	0.472417	0.530367	-1.15796	1.0325e-10	3.10083e-10	-1.89396	8.27316e-15	1.87043e-14	-2.13149	4.72487e-08	8.51024e-08	chrIII	173826	176438	2613	-	TATA-less	2_mis	nocall	TAF1-enriched	NA	TFIID
YCR031C	-2.75432	7.40699e-59	1.32303e-57	-2.52716	2.6472e-49	8.18996e-49	-2.77414	1.936e-40	1.11745e-39	-3.46005	1.11185e-39	2.68927e-39	0.107868	0.408268	0.468138	0.123524	0.342719	0.397822	0.0361372	0.845335	0.866971	-0.236373	0.165429	0.199765	chrIII	177500	178220	721	-	TATA-less	1_mis	TFIID-dominated	TAF1-enriched	RPG	TFIID
YCR032W	-1.66758	1.76317e-28	6.3751e-28	-3.05407	7.63552e-87	1.12871e-85	-2.44077	1.51499e-31	3.61217e-31	-3.99359	3.34914e-56	3.84609e-55	-0.753832	2.775e-05	0.000104353	-1.27822	9.65798e-13	3.72701e-12	-1.8492	1.04841e-32	1.23127e-31	-2.29888	2.68089e-26	2.07658e-25	chrIII	179520	186023	6504	+	NA	NA	TFIID-dominated	NA	NA	TFIID
YCR033W	-1.71369	5.94039e-30	2.34302e-29	-2.56081	6.42709e-64	3.43865e-63	-2.38245	2.66864e-28	5.14918e-28	-3.71428	6.4562e-39	1.49506e-38	-0.927837	5.65422e-09	6.02105e-08	-1.56262	4.2856e-23	8.05521e-22	-1.87795	1.87294e-23	7.96336e-23	-2.48541	1.74061e-29	1.8889e-28	chrIII	186489	190169	3681	+	TATA-less	1_mis	TFIID-dominated	TAF1-enriched	NA	TFIID
YCR034W	-2.46809	6.84798e-39	4.46062e-38	-2.69418	6.1257e-45	1.63296e-44	-2.77408	9.47333e-40	5.00296e-39	-3.96847	1.83692e-35	3.64841e-35	-1.02814	2.46159e-08	2.21912e-07	-1.00274	2.94629e-08	6.65229e-08	-0.915404	5.54317e-06	8.3985e-06	-0.976081	1.5445e-05	2.45509e-05	chrIII	190592	191635	1044	+	TATA-less	2_mis	TFIID-dominated	TAF1-enriched	NA	TFIID
YCR035C	-1.67937	3.42611e-23	9.15096e-23	-2.00723	2.85758e-31	5.28021e-31	-2.52095	2.17005e-30	4.74088e-30	-4.09715	8.19861e-50	4.53007e-49	-0.913043	1.60779e-06	8.65501e-06	-1.23062	1.34307e-10	3.96437e-10	-2.20963	1.67852e-33	2.1579e-32	-2.87516	8.41384e-28	7.65343e-27	chrIII	191834	193018	1185	-	TATA-less	1_mis	TFIID-dominated	TAF1-enriched	NA	TFIID
YCR036W	-1.68603	1.28741e-22	3.3147e-22	-3.23405	7.49576e-72	5.54024e-71	-2.45843	9.28705e-32	2.25111e-31	-3.45396	3.44655e-34	6.53536e-34	-1.09744	3.92961e-08	3.32331e-07	-1.37499	5.79305e-13	2.30489e-12	-1.67455	1.09458e-22	4.37161e-22	-2.04953	1.71629e-15	4.87105e-15	chrIII	193297	194298	1002	+	TATA-less	1_mis	TFIID-dominated	TAF1-enriched	NA	TFIID
YCR037C	-2.20876	1.3089e-40	9.42051e-40	-3.17304	1.95329e-78	1.90037e-77	-3.0168	2.82255e-42	1.98853e-41	-4.30592	3.7128e-55	3.82691e-54	-1.18861	6.84823e-09	7.12429e-08	-1.8758	8.06764e-21	1.04703e-19	-2.55726	1.55346e-45	9.55234e-44	-2.96206	5.51534e-32	7.99357e-31	chrIII	194414	197185	2772	-	TATA-less	2_mis	TFIID-dominated	TAF1-enriched	NA	TFIID
YCR038C	-1.94671	1.60441e-14	2.72933e-14	-3.44291	1.13285e-35	2.31947e-35	-2.10321	3.34967e-24	5.33766e-24	-4.18227	1.8114e-19	2.58043e-19	-0.970321	0.0135121	0.0227269	-1.67833	2.15922e-05	3.66177e-05	-1.22984	7.02368e-08	1.15258e-07	-2.23224	0.0370834	0.0480927	chrIII	197621	199549	1929	-	NA	NA	TFIID-dominated	NA	NA	TFIID
YCR042C	-1.12089	5.6037e-13	8.94063e-13	-2.60654	1.33186e-61	6.46972e-61	-2.04976	4.48863e-19	6.29685e-19	-3.42358	1.84454e-40	4.66568e-40	0.128267	0.411126	0.470966	-0.2467	0.105324	0.132308	-0.87098	1.86404e-08	3.12978e-08	-0.877626	5.33509e-06	8.65558e-06	chrIII	201174	205397	4224	-	TATA-less	1_mis	TFIID-dominated	TAF1-enriched	NA	TFIID
YCR044C	-2.07248	9.55433e-29	3.51761e-28	-3.29691	4.39872e-65	2.47911e-64	-2.81081	8.28624e-43	6.32262e-42	-4.4661	5.99763e-44	1.91702e-43	-1.19565	1.00415e-07	7.56803e-07	-1.65559	1.35627e-14	6.77722e-14	-1.83688	9.91346e-20	3.16125e-19	-2.29916	1.10194e-15	3.17441e-15	chrIII	206877	207950	1074	-	TATA-less	1_mis	TFIID-dominated	TAF1-enriched	NA	TFIID
YCR046C	-2.38536	2.961e-29	1.12269e-28	-3.16497	1.16893e-43	3.00513e-43	-3.28976	1.27105e-30	2.82376e-30	-5.39789	3.72302e-21	5.41231e-21	-1.34516	2.04636e-08	1.88146e-07	-2.09872	9.84982e-18	7.77186e-17	-2.21596	6.51825e-06	9.82789e-06	-3.1358	3.01397e-06	4.96141e-06	chrIII	209914	210423	510	-	TATA-less	2_mis	TFIID-dominated	TAF1-enriched	NA	NA
YCR047C	-1.50998	1.55152e-08	2.15859e-08	-2.08309	6.04374e-14	8.35935e-14	-2.35083	2.07128e-27	3.81337e-27	-3.59036	4.8208e-24	7.26677e-24	-0.945059	0.000117988	0.000368552	-0.372633	0.13316	0.165243	-1.8339	7.46912e-16	1.78656e-15	-2.29844	5.79528e-14	1.48223e-13	chrIII	210718	211545	828	-	TATA-less	1_mis	TFIID-dominated	TAF1-enriched	NA	TFIID
YCR048W	-2.29501	1.76695e-36	1.00744e-35	-1.95256	4.9178e-26	8.0832e-26	-2.42652	4.75754e-34	1.39767e-33	-4.10088	4.77097e-13	6.41426e-13	-1.37891	2.62612e-11	4.6172e-10	-1.28825	1.19256e-10	3.55217e-10	-1.91361	5.75382e-18	1.59589e-17	-2.36291	2.05585e-21	9.62544e-21	chrIII	211929	213761	1833	+	TATA-less	1_mis	TFIID-dominated	TAF1-enriched	NA	TFIID
YCR052W	-1.79095	1.30277e-32	5.89427e-32	-2.13974	2.44135e-44	6.39618e-44	-2.55904	2.25099e-37	9.16104e-37	-4.26667	2.95734e-39	6.9753e-39	-0.733081	6.18253e-06	2.8487e-05	-1.29173	1.40174e-15	7.95209e-15	-1.82948	7.39238e-19	2.19715e-18	-3.02569	5.02593e-20	2.06808e-19	chrIII	214994	216445	1452	+	TATA-less	1_mis	TFIID-dominated	TAF1-enriched	NA	TFIID
YCR053W	-1.81697	1.9977e-45	1.89519e-44	-2.4831	3.1876e-82	3.63789e-81	-2.46841	5.20614e-31	1.18686e-30	-3.4665	2.09385e-40	5.27453e-40	0.0261898	0.810048	0.836108	-0.11652	0.278781	0.329569	-0.588475	0.109942	0.133994	-0.647716	0.00701675	0.00960605	chrIII	216697	218241	1545	+	TATA-less	1_mis	nocall	TAF1-enriched	NA	TFIID
YCR054C	-1.12806	3.61509e-12	5.60612e-12	-1.39448	5.43614e-17	7.80705e-17	-1.7804	4.82085e-17	6.5665e-17	-3.32055	6.95977e-35	1.35282e-34	-0.391468	0.0911064	0.123942	-0.300687	0.19702	0.238738	-1.32283	2.82773e-11	5.3439e-11	-2.20504	9.73572e-13	2.30561e-12	chrIII	218376	220067	1692	-	TATA-less	2_mis	TFIID-dominated	TAF1-enriched	NA	TFIID
YCR057C	-1.42342	1.06278e-17	2.11231e-17	-1.03188	6.38248e-10	8.45613e-10	-2.06682	2.34485e-25	3.90537e-25	-3.00592	1.1535e-28	1.88915e-28	-0.280135	0.0468934	0.06879	-0.0738178	0.601494	0.654856	-1.33123	9.16078e-17	2.33151e-16	-1.24338	4.40347e-09	8.38034e-09	chrIII	220457	223228	2772	-	TATA-less	1_mis	TFIID-dominated	TAF1-enriched	NA	TFIID
YCR059C	-2.51576	3.46109e-31	1.45951e-30	-2.44674	6.31941e-28	1.07796e-27	-2.84085	1.1583e-36	4.36446e-36	-4.19155	6.04451e-32	1.06833e-31	-0.827743	0.000251603	0.000706606	-1.07583	9.84888e-07	1.90709e-06	-1.00943	8.99994e-08	1.46764e-07	-0.896506	0.000244924	0.000365871	chrIII	223454	224230	777	-	NA	NA	TFIID-dominated	NA	NA	TFIID
YCR060W	-3.01195	7.25613e-23	1.89527e-22	-2.54633	4.3505e-15	6.08485e-15	-2.63228	2.92979e-19	4.12731e-19	-4.75225	3.37248e-14	4.57054e-14	-1.31083	2.32836e-05	8.91746e-05	-1.5994	1.37148e-07	2.87712e-07	-1.5108	4.67797e-08	7.73492e-08	-2.8151	7.69482e-12	1.71927e-11	chrIII	224399	224734	336	+	TATA-containing	0_mis	TFIID-dominated	TAF1-enriched	NA	NA
YCR063W	-1.94901	2.18002e-11	3.27696e-11	-2.5303	2.85793e-16	4.0627e-16	-2.202	8.68253e-10	1.10166e-09	-2.52991	0.000160401	0.000199717	-0.753052	0.0617664	0.0879473	-1.37984	0.00059846	0.000905722	-0.303342	0.720389	0.766218	0.792093	0.425653	0.481545	chrIII	228318	228791	474	+	TATA-less	2_mis	TFIID-dominated	TAF1-enriched	NA	TFIID
YCR065W	-2.90777	1.04301e-90	7.15403e-89	-2.74191	3.07012e-77	2.819e-76	-3.35095	4.29258e-45	4.44982e-44	-4.91668	2.76903e-16	3.82657e-16	-2.02109	1.75218e-22	2.10718e-20	-1.67667	1.51763e-16	1.01294e-15	-1.84482	0.0252167	0.0321838	-2.86017	7.56101e-05	0.000115676	chrIII	229310	231004	1695	+	TATA-less	1_mis	TFIID-dominated	TAF1-depleted	NA	CR
YCR066W	-1.32029	4.27385e-12	6.59786e-12	-2.9228	3.93153e-47	1.125e-46	-2.72873	2.90494e-32	7.36733e-32	-4.49326	3.38866e-39	7.95645e-39	-0.74653	0.0164831	0.0271467	-1.69742	3.8579e-08	8.60366e-08	-2.12839	8.86402e-18	2.42449e-17	-2.73467	9.8947e-15	2.66666e-14	chrIII	231500	232963	1464	+	TATA-less	2_mis	TFIID-dominated	TAF1-enriched	NA	TFIID
YCR067C	-1.3333	2.33125e-18	4.76888e-18	-2.26459	1.49074e-49	4.66895e-49	-2.35844	3.09216e-32	7.81135e-32	-3.99718	6.6432e-45	2.2965e-44	0.13668	0.362894	0.422311	-0.834743	1.45502e-08	3.41121e-08	-1.25817	8.785e-12	1.70165e-11	-1.87231	9.3679e-17	2.93879e-16	chrIII	233125	236322	3198	-	TATA-containing	0_mis	TFIID-dominated	TAF1-enriched	NA	TFIID
YCR068W	-2.46681	3.28259e-35	1.73062e-34	-3.27791	1.09578e-57	4.63948e-57	-2.97236	3.00709e-50	6.11167e-49	-4.43611	6.20387e-53	4.82356e-52	-1.45317	1.63089e-06	8.74805e-06	-2.0623	2.81382e-12	1.0265e-11	-2.44957	2.41476e-27	1.53705e-26	-2.98834	9.90761e-17	3.10213e-16	chrIII	237214	238776	1563	+	TATA-less	1_mis	TFIID-dominated	TAF1-enriched	NA	TFIID
YCR069W	-1.98113	2.29022e-35	1.21302e-34	-2.57969	1.23896e-56	4.99885e-56	-2.41587	2.28065e-32	5.8472e-32	-4.07979	2.3205e-41	6.22959e-41	-0.780915	5.65503e-06	2.62577e-05	-1.06068	1.34722e-10	3.97481e-10	-1.25201	5.39585e-08	8.89933e-08	-1.94721	2.72099e-13	6.6391e-13	chrIII	239055	240011	957	+	TATA-less	1_mis	nocall	TAF1-enriched	NA	TFIID
YCR071C	-1.57374	2.23997e-13	3.62528e-13	-2.97499	1.0204e-37	2.20092e-37	-2.29476	8.19252e-20	1.16438e-19	-4.01995	1.03234e-27	1.65493e-27	-0.832339	0.0040744	0.00796468	-1.56708	5.41863e-08	1.18818e-07	-2.45867	2.38217e-19	7.34831e-19	-3.0936	3.74614e-17	1.21554e-16	chrIII	240103	240543	441	-	TATA-less	2_mis	TFIID-dominated	TAF1-enriched	NA	TFIID
YCR072C	-1.14102	3.76781e-10	5.47762e-10	-1.05645	9.57338e-09	1.25552e-08	-1.9691	2.51662e-21	3.70804e-21	-2.68131	3.913e-20	5.62421e-20	-0.348802	0.0605823	0.086389	-0.0133794	0.943096	0.955957	-1.722	1.98056e-09	3.45723e-09	-1.48941	0.000862529	0.00124787	chrIII	240805	242352	1548	-	TATA-containing	0_mis	TFIID-dominated	TAF1-enriched	NA	TFIID
YCR073C	-2.00041	4.61757e-23	1.2238e-22	-2.32983	2.34862e-28	4.05772e-28	-2.71516	5.27669e-32	1.30931e-31	-4.13382	9.33501e-41	2.4064e-40	-1.11887	3.19774e-05	0.000118399	-1.41362	2.87661e-07	5.86532e-07	-2.10502	5.26657e-21	1.85554e-20	-2.06364	4.09016e-12	9.29478e-12	chrIII	242588	246583	3996	-	TATA-less	1_mis	TFIID-dominated	TAF1-enriched	NA	TFIID
YCR073W-A	-1.89477	1.23879e-15	2.22141e-15	-2.55927	6.7115e-26	1.10024e-25	-2.58204	1.27551e-38	5.94914e-38	-4.11877	6.60405e-43	1.95855e-42	-0.766828	0.000372339	0.000991529	-1.33886	2.75259e-10	7.81792e-10	-1.92367	1.689e-24	7.95439e-24	-2.54586	1.03436e-24	6.75964e-24	chrIII	246963	247910	948	+	TATA-less	1_mis	NA	TAF1-enriched	NA	TFIID
YCR075C	-2.36299	6.80986e-19	1.43587e-18	-2.96405	2.64398e-26	4.36568e-26	-3.03032	4.4626e-43	3.50476e-42	-4.60867	2.89279e-39	6.82544e-39	-1.25235	0.000109948	0.000347409	-1.79822	1.48784e-08	3.48441e-08	-2.33173	6.21612e-20	2.01375e-19	-3.10781	1.01001e-18	3.74491e-18	chrIII	248033	248815	783	-	TATA-less	2_mis	TFIID-dominated	TAF1-depleted	NA	TFIID
YCR075W-A	-2.74026	1.6908e-16	3.15142e-16	-3.05933	1.26165e-17	1.83069e-17	-2.63128	1.47913e-07	1.84431e-07	-4.70505	2.74624e-17	3.82408e-17	-1.44767	3.65483e-05	0.000132789	-2.22052	2.92121e-10	8.26813e-10	-2.36235	2.85242e-06	4.36946e-06	-3.20894	2.30887e-14	6.09902e-14	chrIII	248975	249202	228	+	NA	NA	NA	NA	NA	TFIID
YCR076C	-2.49314	1.88966e-25	5.73251e-25	-3.35718	2.39227e-39	5.40112e-39	-3.21048	1.24108e-47	1.79009e-46	-4.89373	1.58587e-34	3.04829e-34	-1.32407	1.50268e-06	8.15789e-06	-1.90891	1.36895e-12	5.18188e-12	-2.00247	3.61549e-23	1.50196e-22	-2.88074	1.0847e-21	5.25587e-21	chrIII	249293	250045	753	-	NA	NA	TFIID-dominated	NA	NA	NA
YCR077C	-1.74728	1.40808e-25	4.32515e-25	-2.11872	1.49388e-36	3.11918e-36	-2.68788	5.01156e-41	3.10365e-40	-3.68767	1.05162e-38	2.39817e-38	-0.723054	2.76712e-08	2.46499e-07	-1.21838	2.88966e-21	4.013e-20	-2.22551	1.30796e-26	7.65976e-26	-2.56355	8.01812e-18	2.74654e-17	chrIII	250238	252628	2391	-	TATA-less	2_mis	TFIID-dominated	TAF1-enriched	NA	TFIID
YCR079W	-1.83332	7.23215e-19	1.5221e-18	-2.85108	7.94398e-40	1.81324e-39	-2.93218	2.47073e-41	1.58728e-40	-4.73484	2.87003e-47	1.22062e-46	-0.70772	0.0111214	0.0191558	-2.10098	7.15273e-14	3.24677e-13	-2.79708	8.58e-36	1.50334e-34	-3.20386	7.13608e-28	6.56439e-27	chrIII	252845	254173	1329	+	TATA-less	1_mis	TFIID-dominated	TAF1-enriched	NA	TFIID
YCR081W	-1.44166	1.54104e-18	3.18566e-18	-2.47447	2.60533e-50	8.39026e-50	-2.64438	8.18978e-37	3.13521e-36	-4.32992	1.21153e-48	5.92665e-48	-0.4046	0.0228945	0.0364192	-1.23314	3.76911e-12	1.35237e-11	-1.79346	2.76753e-22	1.0763e-21	-2.36999	5.02033e-22	2.48615e-21	chrIII	254371	258654	4284	+	TATA-less	1_mis	TFIID-dominated	TAF1-enriched	NA	TFIID
YCR082W	-1.45455	2.75005e-15	4.85274e-15	-2.04318	4.85463e-28	8.30165e-28	-2.24435	1.28323e-28	2.51509e-28	-4.07275	2.84377e-48	1.33217e-47	-0.20007	0.188781	0.237377	-0.898421	1.45598e-09	3.7807e-09	-0.914044	7.25571e-07	1.13575e-06	-1.40917	6.27264e-11	1.3365e-10	chrIII	258883	259269	387	+	TATA-less	1_mis	TFIID-dominated	TAF1-enriched	NA	TFIID
YCR083W	-2.33185	7.92145e-21	1.8443e-20	-2.74163	4.34178e-24	6.91117e-24	-2.77836	6.22573e-30	1.32516e-29	-4.3824	3.52929e-20	5.0781e-20	-0.808473	0.00176641	0.00384417	-1.56544	9.46902e-10	2.52597e-09	-1.22331	3.40476e-07	5.39957e-07	-1.97333	1.82772e-07	3.18898e-07	chrIII	259578	259961	384	+	TATA-less	1_mis	TFIID-dominated	TAF1-enriched	NA	TFIID
YCR084C	-2.18135	4.23847e-47	4.38487e-46	-2.59194	3.31763e-65	1.88219e-64	-2.8538	1.55638e-44	1.4998e-43	-3.96372	2.41041e-39	5.72133e-39	-0.577938	9.00644e-06	3.93003e-05	-1.02005	2.94804e-15	1.60559e-14	-2.05413	3.2211e-14	7.06907e-14	-2.15766	4.26735e-05	6.61084e-05	chrIII	260311	262452	2142	-	TATA-less	1_mis	TFIID-dominated	TAF1-enriched	NA	TFIID
YCR086W	-2.04409	6.69617e-13	1.06589e-12	-2.85645	6.90964e-21	1.04875e-20	-3.1254	1.56815e-26	2.75401e-26	-5.47553	6.36745e-14	8.60697e-14	-1.23521	0.00126948	0.00287401	-1.78292	1.66518e-06	3.14342e-06	-2.63191	9.17918e-05	0.000132162	-2.71822	0.0135637	0.0182134	chrIII	263392	263964	573	+	TATA-less	2_mis	TFIID-dominated	TAF1-enriched	NA	TFIID
YCR088W	-1.86361	2.92263e-38	1.82904e-37	-2.54481	3.07536e-68	1.98999e-67	-2.39433	5.6664e-34	1.65022e-33	-3.65618	1.11818e-40	2.86931e-40	-0.0149526	0.893313	0.909344	-0.467214	2.18109e-05	3.69695e-05	-0.568787	0.00169001	0.0022925	-0.647602	0.00168885	0.00239867	chrIII	265068	266846	1779	+	TATA-less	1_mis	TFIID-dominated	TAF1-enriched	NA	TFIID
YCR089W	-1.70356	3.02927e-20	6.85863e-20	-2.52167	1.30583e-41	3.15154e-41	-3.2949	5.95519e-43	4.62285e-42	-3.403	9.88102e-19	1.39318e-18	-0.36899	0.0852604	0.117021	-0.92284	1.11014e-05	1.92764e-05	-1.97879	0.000346439	0.000485298	-1.31781	0.177739	0.21372	chrIII	267434	272263	4830	+	TATA-less	2_mis	SAGA-dominated	TAF1-depleted	NA	TFIID
YCR091W	-1.46599	3.61441e-11	5.39408e-11	-3.29961	2.20561e-42	5.45164e-42	-2.71974	1.12847e-28	2.21759e-28	-4.38247	1.33038e-32	2.39982e-32	-0.963393	0.00603487	0.0111969	-1.56287	4.47704e-06	8.06954e-06	-2.17247	9.16331e-10	1.6208e-09	-2.40001	3.14493e-06	5.17177e-06	chrIII	274404	276566	2163	+	NA	NA	SAGA-dominated	NA	NA	TFIID
YCR092C	-1.34749	2.18304e-16	4.04361e-16	-2.22753	1.77494e-40	4.14658e-40	-2.28219	6.0627e-26	1.0389e-25	-3.681	2.60215e-42	7.42953e-42	-0.689039	0.00114394	0.00262738	-0.923533	5.83393e-06	1.04176e-05	-1.8055	1.13344e-23	4.93174e-23	-2.28409	1.94963e-20	8.32167e-20	chrIII	276764	279820	3057	-	TATA-less	1_mis	TFIID-dominated	TAF1-enriched	NA	TFIID
YCR093W	-1.64788	3.54496e-35	1.86607e-34	-2.70368	3.11466e-91	5.72746e-90	-2.65435	7.64448e-38	3.28243e-37	-4.13888	7.71e-47	3.17296e-46	-0.199218	0.118125	0.156624	-0.733223	7.65122e-09	1.85221e-08	-1.22458	2.41169e-16	5.97014e-16	-1.48107	4.43763e-14	1.14351e-13	chrIII	280117	286443	6327	+	TATA-less	2_mis	TFIID-dominated	TAF1-enriched	NA	TFIID
YCR094W	-1.74394	2.90385e-22	7.29846e-22	-2.26019	1.28021e-34	2.55335e-34	-2.42573	3.09408e-25	5.12647e-25	-3.99813	3.37544e-38	7.51697e-38	-0.745759	0.000288222	0.000793394	-1.27083	3.3065e-10	9.2983e-10	-1.43266	2.49496e-11	4.73012e-11	-2.35669	3.17282e-15	8.82814e-15	chrIII	286762	287937	1176	+	TATA-less	1_mis	TFIID-dominated	TAF1-enriched	NA	TFIID
YCR098C	-1.96437	1.63258e-09	2.32707e-09	-2.77369	2.86995e-15	4.02309e-15	-1.80803	2.51939e-12	3.2583e-12	-1.85324	7.56656e-06	9.58763e-06	-0.954364	0.0424041	0.0629103	-1.91204	3.73064e-05	6.21076e-05	-1.24603	0.000126099	0.000180205	-1.27558	0.0106166	0.0143744	chrIII	297049	298605	1557	-	NA	NA	nocall	NA	NA	NA
YCR104W	-1.92897	0.000694253	0.000882975	-3.73391	2.91768e-12	3.96599e-12	-2.13053	0.00713222	0.00838636	-4.13	0.00322194	0.00392537	-0.615574	0.305644	0.36364	-1.15035	0.0555112	0.0718297	-0.39966	0.54533	0.604109	-1.18317	0.329846	0.381902	chrIII	307801	308175	375	+	NA	NA	TFIID-dominated	NA	NA	NA
YCR105W	-2.5236	0.00210876	0.00265346	-2.73948	0.00127549	0.00156954	-2.79898	3.98444e-08	5.00255e-08	-3.32776	0.0129085	0.0154833	0.00601363	0.992031	0.992963	-0.983126	0.0999447	0.12584	-0.682876	0.150676	0.181201	-0.211797	0.795368	0.817556	chrIII	309070	310155	1086	+	NA	NA	SAGA/TFIID-dominated	NA	NA	NA
YCR106W	-2.29306	6.45177e-36	3.52331e-35	-3.69496	9.19232e-90	1.56452e-88	-2.96125	8.7283e-47	1.11506e-45	-4.2702	6.63805e-55	6.61939e-54	-1.23474	6.09839e-08	4.86981e-07	-2.4715	2.02511e-30	8.83084e-29	-2.75285	2.0341e-46	1.44111e-44	-3.25285	2.16731e-32	3.27962e-31	chrIII	310958	313456	2499	+	TATA-less	1_mis	TFIID-dominated	TAF1-enriched	NA	TFIID
YCR107W	-2.09915	1.41476e-28	5.15064e-28	-3.59449	8.32845e-78	7.82532e-77	-2.80787	3.29958e-44	3.06514e-43	-3.8774	6.66188e-43	1.97483e-42	-0.978338	0.000924843	0.00217996	-2.02106	1.87911e-13	8.01256e-13	-2.20548	5.98081e-23	2.43339e-22	-2.37895	2.64373e-15	7.40018e-15	chrIII	313890	314981	1092	+	NA	NA	TFIID-dominated	NA	NA	TFIID
YDL001W	-1.49588	3.35733e-15	5.9046e-15	-2.8083	2.91322e-44	7.62373e-44	-2.72831	1.50932e-30	3.32775e-30	-4.37132	1.31238e-47	5.74091e-47	-0.961492	0.000370671	0.000987964	-1.34403	5.6012e-07	1.11292e-06	-2.22144	7.72637e-22	2.90597e-21	-3.01806	1.65219e-19	6.51092e-19	chrIV	447984	449276	1293	+	TATA-less	1_mis	TFIID-dominated	TAF1-enriched	NA	TFIID
YDL002C	-1.72541	1.38155e-19	3.01594e-19	-3.07901	4.94146e-53	1.75341e-52	-2.78368	4.38867e-38	1.93523e-37	-4.22373	9.07478e-44	2.85456e-43	-1.06686	1.37171e-05	5.66491e-05	-1.78012	3.90587e-13	1.59478e-12	-2.56833	2.22704e-37	4.72829e-36	-3.31321	2.11446e-27	1.83629e-26	chrIV	446967	447578	612	-	TATA-less	1_mis	TFIID-dominated	TAF1-enriched	NA	TFIID
YDL003W	-2.22065	5.96737e-47	6.0908e-46	-1.90949	2.31248e-34	4.58418e-34	-2.43511	2.74665e-29	5.61469e-29	-5.03771	4.7154e-66	1.74651e-64	-1.2695	1.87649e-12	3.97301e-11	-0.801994	5.18373e-06	9.29463e-06	-1.74717	1.01609e-24	4.92774e-24	-3.31427	3.00847e-43	1.46427e-41	chrIV	444683	446383	1701	+	TATA-containing	0_mis	SAGA-dominated	TAF1-depleted	NA	CR
YDL004W	-2.02463	2.75827e-36	1.54693e-35	-2.56209	8.00705e-54	2.91046e-53	-2.47818	5.35093e-27	9.62164e-27	-4.33797	1.79189e-53	1.47306e-52	-0.435255	0.00111347	0.0025672	-0.75346	1.45948e-08	3.42045e-08	-0.811618	4.28528e-05	6.25705e-05	-0.902093	2.21334e-06	3.67126e-06	chrIV	443029	443511	483	+	TATA-less	1_mis	TFIID-dominated	TAF1-enriched	NA	TFIID
YDL005C	-1.19954	1.51133e-10	2.21831e-10	-2.32014	1.22339e-33	2.38388e-33	-2.42475	1.51636e-28	2.96508e-28	-3.75669	6.86138e-39	1.58547e-38	-0.688985	0.00189494	0.00407958	-0.988661	6.72815e-06	1.19589e-05	-1.92177	3.12498e-11	5.89369e-11	-2.53166	8.84542e-09	1.65633e-08	chrIV	441014	442309	1296	-	TATA-less	2_mis	TFIID-dominated	TAF1-depleted	NA	TFIID
YDL006W	-1.57892	9.24749e-21	2.14503e-20	-2.83357	3.38072e-57	1.39942e-56	-2.47474	2.36072e-34	7.12571e-34	-3.98912	6.96952e-39	1.60896e-38	-0.954565	0.00017208	0.000508961	-1.64784	8.6064e-11	2.60743e-10	-2.20467	1.15763e-31	1.22095e-30	-3.54845	1.10672e-33	1.94555e-32	chrIV	439909	440754	846	+	TATA-less	2_mis	TFIID-dominated	TAF1-depleted	NA	TFIID
YDL007W	-1.69862	1.09858e-21	2.67394e-21	-3.53822	1.50687e-86	2.17135e-85	-2.50245	1.63946e-29	3.38439e-29	-4.46093	7.74319e-66	2.77643e-64	-0.521441	0.000175436	0.000517615	-1.49941	3.88378e-28	1.30276e-26	-1.51599	1.09899e-21	4.09326e-21	-2.10307	8.94166e-25	5.86695e-24	chrIV	438047	439360	1314	+	TATA-less	2_mis	TFIID-dominated	TAF1-enriched	NA	TFIID
YDL008W	-2.03167	2.17738e-22	5.515e-22	-2.8369	2.53777e-38	5.57009e-38	-2.63194	5.51845e-33	1.47871e-32	-4.19341	1.37938e-31	2.41517e-31	-1.02799	0.000372098	0.000991328	-1.66323	2.17774e-09	5.57954e-09	-1.53934	7.26337e-12	1.41153e-11	-2.26821	7.34751e-14	1.85882e-13	chrIV	433497	433994	498	+	TATA-less	1_mis	TFIID-dominated	TAF1-enriched	NA	TFIID
YDL010W	-1.51645	1.08146e-11	1.64582e-11	-3.12695	2.47252e-38	5.43384e-38	-2.29547	6.86154e-21	9.99139e-21	-3.58835	6.901e-27	1.08971e-26	-0.908891	0.00377396	0.00743784	-0.990359	0.00118965	0.00176611	-1.55715	7.79006e-10	1.38203e-09	-2.42225	3.12063e-13	7.59713e-13	chrIV	432330	433025	696	+	TATA-less	1_mis	TFIID-dominated	TAF1-depleted	NA	TFIID
YDL012C	-1.81574	1.52637e-16	2.85424e-16	-1.95875	3.20755e-18	4.68896e-18	-2.62311	1.22087e-13	1.59961e-13	-3.50532	2.89292e-12	3.86852e-12	-0.622007	0.0024882	0.00517522	-1.16427	4.99116e-09	1.22965e-08	-2.58548	0.000581702	0.000806367	-1.81396	0.0105175	0.0142432	chrIV	431108	431517	410	-	TATA-containing	0_mis	TFIID-dominated	TAF1-enriched	NA	TFIID
YDL013W	-2.10559	2.85952e-25	8.56481e-25	-3.11717	4.2808e-49	1.31374e-48	-2.80195	3.3922e-46	3.97754e-45	-3.68101	2.93508e-38	6.54929e-38	-0.945807	0.000200181	0.000581212	-1.44886	4.87843e-09	1.20369e-08	-2.33342	7.09426e-35	1.09835e-33	-2.44746	6.83558e-23	3.62747e-22	chrIV	429067	430926	1860	+	TATA-less	2_mis	TFIID-dominated	TAF1-enriched	NA	TFIID
YDL014W	-2.33918	1.14573e-50	1.40332e-49	-2.60517	1.6614e-61	8.04769e-61	-2.61751	1.21322e-33	3.43482e-33	-3.98638	1.76197e-54	1.64965e-53	-0.909448	4.15605e-14	1.15696e-12	-0.898253	5.31082e-14	2.45672e-13	-1.05431	0.00189245	0.00256019	-1.55995	1.65243e-13	4.10088e-13	chrIV	427364	428347	984	+	NA	NA	TFIID-dominated	NA	NA	TFIID
YDL015C	-2.24164	2.35515e-42	1.88715e-41	-2.58394	1.48781e-54	5.52213e-54	-2.56854	3.90591e-38	1.73605e-37	-3.77079	2.34926e-49	1.22763e-48	-0.609614	2.78885e-05	0.000104808	-0.963166	2.00255e-11	6.54278e-11	-0.904691	2.62394e-08	4.3831e-08	-1.05502	8.70788e-08	1.55002e-07	chrIV	426002	426934	933	-	TATA-less	2_mis	TFIID-dominated	TAF1-enriched	NA	TFIID
YDL017W	-1.62985	4.04417e-12	6.2602e-12	-3.06041	1.33283e-34	2.65598e-34	-3.09453	6.08166e-42	4.15797e-41	-4.93451	4.98333e-51	3.16613e-50	-0.877568	0.0102378	0.0177868	-1.73298	6.45426e-07	1.27314e-06	-2.67662	3.64e-31	3.63331e-30	-3.76344	2.75055e-27	2.33887e-26	chrIV	424209	425732	1524	+	TATA-less	2_mis	TFIID-dominated	TAF1-enriched	NA	TFIID
YDL018C	-2.40127	7.72841e-25	2.2433e-24	-3.10599	9.49779e-37	1.99404e-36	-3.00299	3.10344e-42	2.17727e-41	-3.71388	4.41097e-30	7.46157e-30	-1.30357	2.92921e-06	1.47887e-05	-1.86305	1.04639e-11	3.55e-11	-2.69849	1.54537e-38	3.81543e-37	-3.31876	1.98211e-29	2.14028e-28	chrIV	422833	423510	678	-	TATA-less	2_mis	TFIID-dominated	TAF1-depleted	NA	TFIID
YDL019C	-1.97832	1.86799e-36	1.06328e-35	-3.37485	4.92402e-98	1.21489e-96	-2.60473	1.81929e-39	9.27906e-39	-3.88063	2.65126e-50	1.5514e-49	-0.54522	0.000574759	0.00144325	-1.47432	2.42003e-21	3.39688e-20	-1.61268	3.95239e-22	1.52166e-21	-1.65941	1.08932e-15	3.13944e-15	chrIV	417663	421514	3852	-	TATA-less	2_mis	TFIID-dominated	TAF1-enriched	NA	TFIID
YDL020C	-1.92637	1.15946e-41	8.93566e-41	-1.94597	2.74579e-42	6.75758e-42	-1.40122	1.15153e-10	1.47111e-10	-3.12672	1.81554e-37	3.9289e-37	-1.14988	1.41556e-14	4.43321e-13	-0.909451	4.83445e-10	1.33275e-09	-1.36476	5.32251e-18	1.48067e-17	-2.50804	7.45725e-31	9.61189e-30	chrIV	415113	416708	1596	-	TATA-containing	0_mis	TFIID-dominated	TAF1-enriched	NA	CR
YDL021W	-1.58478	1.72369e-08	2.39522e-08	-4.25486	3.03959e-33	5.87946e-33	-2.7913	1.25929e-33	3.55474e-33	-5.36016	1.18243e-19	1.68836e-19	-1.12648	0.0034664	0.00691785	-1.88385	2.3075e-06	4.29276e-06	-2.08859	2.08837e-16	5.18751e-16	-2.92765	5.58879e-10	1.12327e-09	chrIV	413953	414888	936	+	NA	NA	TFIID-dominated	NA	NA	NA
YDL022W	-3.52062	6.36477e-119	1.55914e-116	-4.48984	2.62916e-184	1.12709e-181	-3.41976	8.82012e-73	2.68893e-70	-5.46091	1.47937e-94	1.66207e-91	-1.43308	5.31433e-18	2.85313e-16	-2.30315	4.12076e-45	9.29444e-43	-2.663	3.22941e-55	5.39726e-53	-3.63677	2.37514e-64	5.16356e-62	chrIV	411825	413000	1176	+	TATA-containing	0_mis	SAGA-dominated	TAF1-depleted	NA	CR
YDL024C	-1.83999	0.000289162	0.000370583	-3.67577	4.43413e-10	5.88273e-10	-2.89128	3.22661e-16	4.34208e-16	-4.00916	7.83485e-05	9.78412e-05	-0.858585	0.142867	0.185702	-1.49661	0.0107088	0.0147435	-1.74771	0.00156683	0.00213162	-0.944159	0.378918	0.432789	chrIV	408451	409857	1407	-	NA	NA	nocall	NA	NA	NA
YDL025C	-1.743	5.18824e-28	1.82119e-27	-3.97162	1.2116e-132	1.17047e-130	-3.25325	1.04759e-57	5.85517e-56	-4.88317	1.50842e-62	3.71103e-61	-0.591282	0.00392125	0.00769784	-2.58364	4.57473e-39	4.53384e-37	-2.89384	1.23295e-58	2.87013e-56	-4.2424	2.16009e-67	5.41849e-65	chrIV	405344	407206	1863	-	TATA-less	1_mis	TFIID-dominated	TAF1-enriched	NA	CR
YDL028C	-1.611	3.84531e-20	8.63056e-20	-2.27317	1.1756e-37	2.5309e-37	-2.3559	1.94501e-27	3.58345e-27	-3.60192	2.3074e-40	5.79515e-40	-0.749997	5.89574e-05	0.000201771	-1.49252	6.65196e-16	3.9519e-15	-2.29121	1.61566e-29	1.33302e-28	-2.75664	1.17481e-18	4.32398e-18	chrIV	400997	403291	2295	-	TATA-less	1_mis	TFIID-dominated	TAF1-enriched	NA	TFIID
YDL029W	-1.93872	1.16302e-38	7.46225e-38	-2.9456	6.34025e-86	8.91142e-85	-2.42768	4.75053e-36	1.68225e-35	-3.89126	1.61864e-58	2.5375e-57	-0.451028	0.000804325	0.00194311	-1.30056	8.568e-23	1.53543e-21	-1.20744	1.03908e-16	2.6394e-16	-1.3411	5.34873e-12	1.20707e-11	chrIV	399340	400638	1299	+	TATA-less	1_mis	TFIID-dominated	TAF1-enriched	NA	CR
YDL030W	-1.42034	6.12587e-14	1.01737e-13	-2.73655	3.27338e-41	7.80673e-41	-2.41507	1.34859e-30	2.98712e-30	-4.09576	4.98158e-37	1.06e-36	-0.853914	0.00508321	0.00966341	-1.34781	1.50824e-05	2.59002e-05	-2.34639	8.42425e-27	5.01455e-26	-3.22724	1.39031e-20	5.99758e-20	chrIV	397537	399129	1593	+	TATA-less	1_mis	TFIID-dominated	TAF1-enriched	NA	TFIID
YDL031W	-1.36043	6.98898e-19	1.47273e-18	-1.38922	2.56294e-19	3.8108e-19	-2.22356	6.85936e-25	1.11854e-24	-3.21632	4.50199e-39	1.05156e-38	-0.30667	0.0451018	0.0665381	-0.15239	0.320021	0.373662	-1.52442	1.07182e-17	2.91209e-17	-1.06112	1.48501e-06	2.48531e-06	chrIV	394217	397204	2988	+	TATA-less	2_mis	TFIID-dominated	TAF1-enriched	NA	TFIID
YDL033C	-1.35017	3.90003e-11	5.81529e-11	-1.84038	5.5449e-19	8.18606e-19	-2.22556	9.39817e-26	1.597e-25	-3.68063	2.00488e-31	3.49131e-31	-0.879057	0.000183122	0.000537391	-1.519	1.89004e-11	6.19998e-11	-1.97543	3.2838e-18	9.29843e-18	-2.40685	3.52764e-15	9.78616e-15	chrIV	392659	393912	1254	-	TATA-less	1_mis	TFIID-dominated	TAF1-enriched	NA	TFIID
YDL035C	-1.22268	7.45748e-17	1.4181e-16	-2.20244	5.67162e-50	1.81106e-49	-2.01181	1.50925e-19	2.13736e-19	-3.58891	9.90915e-44	3.10398e-43	-0.466843	0.0088062	0.0155719	-1.20964	6.22148e-12	2.17502e-11	-1.69357	9.82113e-28	6.55211e-27	-2.47888	1.9129e-25	1.37249e-24	chrIV	389172	392057	2886	-	TATA-less	1_mis	nocall	TAF1-enriched	NA	TFIID
YDL036C	-1.45158	4.89169e-17	9.39571e-17	-2.03483	3.82113e-30	6.86823e-30	-2.25913	1.83962e-25	3.07382e-25	-3.29665	2.46086e-31	4.27581e-31	-0.440629	0.0507371	0.0737626	-1.25186	3.407e-08	7.63977e-08	-1.82471	1.19233e-17	3.22876e-17	-2.09845	2.36749e-10	4.85712e-10	chrIV	387513	388901	1389	-	TATA-less	1_mis	TFIID-dominated	TAF1-enriched	NA	TFIID
YDL037C	-2.16785	7.82474e-08	1.07211e-07	-2.45649	1.2929e-09	1.70835e-09	-3.50065	8.33646e-73	2.66251e-70	-4.68357	2.18546e-58	3.35585e-57	-1.32827	4.57461e-08	3.79409e-07	-1.78581	3.48666e-13	1.43165e-12	-3.26955	3.13789e-27	1.96472e-26	-4.14644	5.04409e-23	2.72556e-22	chrIV	384601	385587	987	-	TATA-less	1_mis	TFIID-dominated	TAF1-enriched	NA	CR
YDL039C	-1.4545	0.0166566	0.0204929	-1.52202	0.0123197	0.0147884	-2.61236	4.56863e-37	1.79192e-36	-4.26288	1.82705e-48	8.72869e-48	-0.850031	0.000118393	0.000369623	-1.25607	3.28005e-08	7.37024e-08	-2.54787	1.05411e-05	1.5726e-05	-3.01419	0.000411742	0.000605634	chrIV	381985	384081	2097	-	NA	NA	TFIID-dominated	NA	NA	CR
YDL040C	-1.89644	3.52195e-43	2.96406e-42	-2.41762	5.13581e-68	3.27689e-67	-2.48331	6.87552e-34	1.99025e-33	-3.83391	6.07421e-54	5.29705e-53	-0.30907	0.00804264	0.0143844	-0.665791	7.44289e-09	1.8052e-08	-0.844377	7.78415e-08	1.27384e-07	-0.815324	2.32683e-05	3.66382e-05	chrIV	378874	381438	2565	-	TATA-less	1_mis	TFIID-dominated	TAF1-enriched	NA	TFIID
YDL042C	-1.90937	2.80678e-32	1.25092e-31	-2.40131	6.89175e-46	1.88629e-45	-2.78708	6.98709e-35	2.20115e-34	-4.40209	6.60326e-34	1.24302e-33	-0.740531	0.00123783	0.0028119	-1.38277	1.33425e-09	3.48396e-09	-2.45119	1.59559e-12	3.19609e-12	-2.55362	2.42501e-05	3.80831e-05	chrIV	376757	378445	1689	-	TATA-less	1_mis	TFIID-dominated	TAF1-enriched	NA	TFIID
YDL043C	-1.52728	1.98673e-16	3.69395e-16	-2.67319	1.92147e-42	4.75789e-42	-2.33104	3.91555e-25	6.45248e-25	-4.01589	1.33708e-35	2.66428e-35	-0.99316	0.000159184	0.00047668	-1.44487	4.02652e-08	8.96136e-08	-2.16916	5.52149e-26	3.00159e-25	-3.38479	7.13707e-27	5.84039e-26	chrIV	375680	376480	801	-	TATA-less	1_mis	TFIID-dominated	TAF1-enriched	NA	TFIID
YDL044C	-1.12878	1.38342e-09	1.97521e-09	-2.57959	4.26955e-39	9.57335e-39	-2.03832	2.76203e-20	3.9651e-20	-3.64352	8.98163e-34	1.67994e-33	-0.547439	0.0501708	0.073063	-1.39458	1.19361e-06	2.28622e-06	-1.88176	6.06794e-15	1.38338e-14	-2.66767	1.83314e-16	5.62093e-16	chrIV	373967	375289	1323	-	NA	NA	TFIID-dominated	NA	NA	TFIID
YDL045C	-1.78791	5.32409e-23	1.40562e-22	-3.53712	4.87439e-70	3.3703e-69	-2.83889	3.20212e-44	2.98286e-43	-4.14864	1.09176e-42	3.19288e-42	-0.883843	0.0014949	0.00332303	-2.07287	1.06404e-13	4.72499e-13	-2.32882	2.1439e-30	1.95167e-29	-2.9422	7.58485e-22	3.71106e-21	chrIV	372688	373608	921	-	TATA-less	2_mis	TFIID-dominated	TAF1-enriched	NA	TFIID
YDL045W-A	-1.9713	5.50604e-23	1.45254e-22	-2.51787	6.01119e-34	1.17836e-33	-2.29448	1.58523e-17	2.17292e-17	-4.163	2.82696e-32	5.04809e-32	-0.88873	8.24518e-05	0.000270771	-1.94229	6.70486e-18	5.41438e-17	-1.92263	4.82606e-13	9.95767e-13	-3.00628	1.24049e-20	5.37929e-20	chrIV	372248	372535	288	+	TATA-containing	0_mis	TFIID-dominated	TAF1-enriched	NA	TFIID
YDL046W	-1.98308	9.90999e-31	4.07999e-30	-2.55474	1.82431e-48	5.46416e-48	-2.61698	1.98198e-38	9.06761e-38	-4.09728	1.83332e-42	5.28816e-42	-0.426558	0.00332163	0.00668215	-0.852367	1.88424e-09	4.85229e-09	-0.900636	2.5231e-06	3.8741e-06	-1.18705	1.06671e-08	1.98717e-08	chrIV	371240	371761	522	+	TATA-containing	0_mis	TFIID-dominated	TAF1-enriched	NA	TFIID
YDL047W	-1.50477	2.20499e-25	6.65377e-25	-2.10885	2.01892e-46	5.63833e-46	-2.46091	7.42924e-34	2.14498e-33	-3.90004	8.85521e-47	3.61995e-46	-0.562774	0.000704536	0.00173267	-1.20171	5.30235e-13	2.11867e-12	-1.86692	5.8626e-25	2.90368e-24	-2.77953	9.07916e-30	1.01568e-28	chrIV	369771	370706	936	+	TATA-less	1_mis	TFIID-dominated	TAF1-enriched	NA	TFIID
YDL048C	-2.47743	6.85387e-33	3.16784e-32	-4.06473	4.37646e-65	2.4686e-64	-3.35074	1.21545e-25	2.04877e-25	-4.95678	2.30206e-16	3.18517e-16	-1.60426	1.0251e-09	1.29223e-08	-2.59069	8.46839e-19	7.94717e-18	-1.88268	0.0278433	0.0354459	-3.75035	0.00225648	0.00318337	chrIV	366739	368211	1473	-	NA	NA	SAGA-dominated	NA	NA	NA
YDL049C	-1.76345	2.00096e-10	2.92635e-10	-3.95184	1.3507e-25	2.20478e-25	-3.14659	9.0967e-25	1.47656e-24	-4.35828	7.30166e-14	9.85987e-14	-0.484001	0.24388	0.298119	-1.58919	0.000361067	0.00055662	-2.4562	8.91302e-11	1.64435e-10	-2.36595	0.000126722	0.000191714	chrIV	365068	365874	807	-	TATA-less	2_mis	TFIID-dominated	TAF1-depleted	NA	NA
YDL051W	-2.36409	1.77454e-45	1.68582e-44	-2.2948	2.92525e-41	6.99104e-41	-2.6954	6.07145e-39	2.94016e-38	-4.05186	4.37062e-49	2.23878e-48	-0.790314	2.48337e-07	1.70852e-06	-0.968526	1.55374e-10	4.5656e-10	-0.806243	1.13468e-07	1.84298e-07	-0.755012	0.000196863	0.00029543	chrIV	363952	364779	828	+	TATA-less	2_mis	TFIID-dominated	TAF1-enriched	NA	TFIID
YDL052C	-1.70524	9.75027e-24	2.67081e-23	-2.15462	3.48355e-35	7.03169e-35	-2.17363	3.52476e-23	5.45972e-23	-3.62448	3.31116e-30	5.61522e-30	-0.767393	9.49631e-06	4.11689e-05	-1.34705	3.36446e-15	1.81725e-14	-1.42621	1.74035e-07	2.79331e-07	-2.22199	1.49681e-06	2.50377e-06	chrIV	362672	363583	912	-	TATA-less	1_mis	TFIID-dominated	TAF1-enriched	NA	TFIID
YDL053C	-1.47853	5.64462e-11	8.37656e-11	-2.52979	2.37868e-28	4.10862e-28	-2.17823	2.32991e-19	3.28776e-19	-3.79785	2.21121e-34	4.225e-34	-0.208424	0.278635	0.335382	-0.735077	9.81718e-05	0.000157813	-0.723149	0.000180155	0.000255327	-0.932034	4.04308e-05	6.27438e-05	chrIV	361699	362256	558	-	TATA-containing	0_mis	TFIID-dominated	TAF1-depleted	NA	TFIID
YDL054C	-1.83712	4.80478e-20	1.07348e-19	-2.89026	1.35772e-45	3.67796e-45	-2.96934	3.4793e-41	2.20356e-40	-4.74929	9.87004e-45	3.3671e-44	-0.769158	0.00376477	0.00742701	-2.13625	3.62854e-16	2.25825e-15	-2.33499	4.65601e-15	1.06821e-14	-3.3687	1.77687e-18	6.44893e-18	chrIV	359825	361285	1461	-	TATA-less	1_mis	TFIID-dominated	TAF1-enriched	NA	TFIID
YDL055C	-3.57736	3.89104e-147	2.9654e-144	-2.73217	2.15342e-86	3.09002e-85	-2.78576	1.93841e-42	1.39644e-41	-4.96151	9.10756e-82	2.45576e-79	-1.34198	1.07106e-25	2.0775e-23	-1.09346	1.06203e-17	8.33941e-17	-0.87236	4.99836e-08	8.25002e-08	-1.00855	2.43251e-07	4.21488e-07	chrIV	355674	356759	1086	-	TATA-containing	0_mis	SAGA-dominated	TAF1-depleted	NA	CR
YDL056W	-1.4855	1.77854e-22	4.54339e-22	-2.35694	1.95458e-52	6.74369e-52	-2.25793	1.08564e-21	1.61343e-21	-3.98117	2.28266e-39	5.42191e-39	-0.756591	6.1016e-05	0.000207516	-1.72985	6.3945e-20	7.21145e-19	-1.85561	2.99343e-21	1.07263e-20	-2.82101	8.92358e-26	6.60609e-25	chrIV	352877	355378	2502	+	TATA-less	2_mis	TFIID-dominated	TAF1-enriched	NA	TFIID
YDL058W	-1.4461	3.49887e-25	1.03711e-24	-2.88476	7.98392e-93	1.60591e-91	-2.33546	3.09739e-25	5.1307e-25	-3.98003	5.1053e-50	2.892e-49	0.0693935	0.602978	0.653626	-0.417716	0.00157478	0.00231578	-0.547938	0.000245713	0.000346433	-0.573374	0.00562242	0.00774598	chrIV	345665	351037	5373	+	TATA-less	2_mis	TFIID-dominated	TAF1-enriched	NA	TFIID
YDL059C	-0.667499	0.00830435	0.0103132	-4.0841	4.08107e-52	1.38849e-51	-2.55285	9.84876e-36	3.36161e-35	-4.81116	1.31589e-39	3.168e-39	-0.126092	0.731265	0.769259	-2.5734	1.16478e-13	5.12709e-13	-2.31885	2.27165e-24	1.05535e-23	-3.31454	1.96326e-17	6.5096e-17	chrIV	344237	344953	717	-	TATA-less	2_mis	TFIID-dominated	TAF1-enriched	NA	TFIID
YDL060W	-1.60891	9.71759e-24	2.66399e-23	-1.69993	1.32059e-25	2.15717e-25	-2.41464	3.38049e-30	7.30678e-30	-3.63496	1.17131e-44	3.96773e-44	-0.683796	1.31696e-05	5.48018e-05	-0.751289	1.853e-06	3.48189e-06	-1.5677	7.94631e-22	2.98525e-21	-1.53361	7.86046e-12	1.75568e-11	chrIV	341619	343985	2367	+	TATA-less	1_mis	TFIID-dominated	TAF1-enriched	NA	TFIID
YDL061C	-2.74439	2.55371e-47	2.67419e-46	-3.47382	1.4103e-68	9.24787e-68	-3.1151	1.46133e-42	1.07824e-41	-4.37774	6.19961e-44	1.97877e-43	-0.242555	0.0655971	0.0927647	-0.018484	0.88718	0.910087	-0.854213	0.000297256	0.000417387	-0.97146	1.0916e-05	1.75053e-05	chrIV	340628	340798	171	-	TATA-less	2_mis	TFIID-dominated	TAF1-enriched	RPG	TFIID
YDL063C	-1.13969	1.12784e-09	1.61297e-09	-0.615218	0.00112486	0.00138692	-2.03621	4.93991e-21	7.22302e-21	-2.7298	1.55736e-22	2.30223e-22	-0.460084	0.0202701	0.0327206	-0.0899282	0.654528	0.703577	-1.48958	2.61234e-16	6.45461e-16	-1.68985	6.61382e-13	1.57947e-12	chrIV	338272	340134	1863	-	TATA-less	2_mis	TFIID-dominated	TAF1-enriched	NA	TFIID
YDL064W	-2.2464	8.69833e-36	4.72008e-35	-2.98002	3.91469e-57	1.61622e-56	-2.7503	9.06564e-33	2.39289e-32	-4.35181	9.19674e-30	1.54102e-29	-0.941495	3.95971e-06	1.91859e-05	-1.52456	2.34173e-14	1.13042e-13	-1.40654	8.48947e-08	1.38648e-07	-2.30305	6.766e-12	1.5159e-11	chrIV	337487	338070	584	+	NA	NA	TFIID-dominated	NA	NA	TFIID
YDL065C	-1.01498	3.82334e-07	5.15617e-07	-3.04453	1.32186e-47	3.85322e-47	-1.84549	1.86239e-14	2.46227e-14	-3.37581	1.39082e-28	2.2723e-28	-0.402222	0.135227	0.176727	-0.83246	0.00169803	0.00248697	-1.55147	4.68031e-16	1.13829e-15	-2.5231	7.22631e-21	3.21926e-20	chrIV	336249	337277	1029	-	TATA-less	1_mis	TFIID-dominated	TAF1-enriched	NA	TFIID
YDL066W	-1.83526	1.59611e-25	4.87867e-25	-2.23773	8.15566e-37	1.71699e-36	-2.18572	1.7107e-30	3.76557e-30	-3.87911	3.08282e-48	1.44015e-47	0.109438	0.333063	0.391689	-0.0187255	0.867173	0.894119	-0.0915218	0.541505	0.601693	0.0802317	0.648791	0.694586	chrIV	334835	336121	1287	+	TATA-less	1_mis	TFIID-dominated	TAF1-enriched	NA	CR
YDL067C	-1.96332	4.69723e-20	1.05014e-19	-2.64522	4.61222e-32	8.66006e-32	-2.04748	5.20175e-14	6.83545e-14	-4.01362	1.06267e-31	1.86695e-31	-0.529449	0.0142988	0.0239296	-0.922407	1.97767e-05	3.36611e-05	-1.06695	6.40544e-05	9.28411e-05	-1.49428	6.20931e-10	1.24568e-09	chrIV	334217	334396	180	-	TATA-less	1_mis	TFIID-dominated	TAF1-enriched	NA	TFIID
YDL069C	-1.5854	6.42891e-11	9.52807e-11	-3.31043	1.0659e-36	2.23509e-36	-2.89157	1.83286e-34	5.58773e-34	-4.55295	4.11818e-32	7.32472e-32	-0.688398	0.0503785	0.0733121	-2.20606	6.90653e-10	1.86831e-09	-2.70151	6.09185e-16	1.46953e-15	-3.50407	2.37334e-09	4.58908e-09	chrIV	333121	333810	690	-	NA	NA	TFIID-dominated	NA	NA	TFIID
YDL070W	-1.41305	9.61392e-24	2.63662e-23	-1.2216	4.1083e-18	5.99423e-18	-0.697791	0.00101954	0.001215	-5.26935	2.44024e-80	5.30635e-78	-0.619286	5.77462e-05	0.000198189	-0.452392	0.00292326	0.00420705	-0.200127	0.200264	0.237504	-3.78384	3.35506e-55	3.9785e-53	chrIV	331024	332940	1917	+	TATA-containing	0_mis	SAGA-dominated	TAF1-depleted	NA	CR
YDL072C	-2.11214	1.65708e-25	5.05377e-25	-2.81756	3.27306e-43	8.31479e-43	-2.78282	5.71781e-44	5.11324e-43	-4.61641	1.04829e-62	2.64663e-61	-0.635746	0.000138487	0.000422486	-1.40036	4.48947e-18	3.70778e-17	-1.68795	1.44196e-17	3.87574e-17	-2.43985	4.05518e-23	2.22438e-22	chrIV	329836	330447	612	-	TATA-less	1_mis	TFIID-dominated	TAF1-enriched	NA	TFIID
YDL073W	-1.01626	7.1955e-11	1.06458e-10	-2.01268	3.02539e-37	6.43047e-37	-1.85323	5.5393e-17	7.53745e-17	-3.33403	2.33065e-37	5.01946e-37	-0.263711	0.139975	0.182417	-0.796998	4.40861e-06	7.95057e-06	-1.20207	2.71825e-14	5.98767e-14	-1.58376	1.41654e-13	3.52756e-13	chrIV	326613	329567	2955	+	TATA-less	1_mis	TFIID-dominated	TAF1-enriched	NA	TFIID
YDL074C	-1.38296	2.95276e-21	7.00794e-21	-2.05522	2.17165e-44	5.69612e-44	-2.02749	3.45283e-20	4.93777e-20	-3.48505	6.37175e-43	1.89383e-42	-0.786165	5.08437e-07	3.18794e-06	-1.35536	2.0884e-18	1.81411e-17	-1.88945	4.31606e-33	5.27806e-32	-2.53123	3.82797e-36	9.35056e-35	chrIV	324047	326149	2103	-	TATA-less	1_mis	TFIID-dominated	TAF1-enriched	NA	TFIID
YDL075W	-2.8682	1.2263e-73	4.02448e-72	-2.97631	3.46692e-76	3.02155e-75	-2.54871	7.65113e-35	2.40132e-34	-3.69419	1.68507e-36	3.47904e-36	-0.0362145	0.752379	0.784881	0.168051	0.141921	0.175516	0.149417	0.398335	0.455181	-0.449851	0.00934768	0.0126879	chrIV	322226	322988	763	+	TATA-less	1_mis	TFIID-dominated	TAF1-enriched	RPG	TFIID
YDL076C	-1.87191	7.54011e-20	1.67263e-19	-3.55566	7.66736e-60	3.50603e-59	-2.98825	1.35238e-43	1.13238e-42	-4.5674	9.98554e-40	2.41957e-39	-1.02835	0.000179426	0.000527573	-1.64049	4.07847e-10	1.13183e-09	-2.73365	1.43798e-16	3.61743e-16	-2.46111	1.21475e-06	2.04033e-06	chrIV	320668	321552	885	-	NA	NA	TFIID-dominated	NA	NA	TFIID
YDL077C	-2.01937	1.3437e-32	6.07543e-32	-3.83707	5.30887e-102	1.59708e-100	-3.05263	8.89734e-51	1.93748e-49	-4.55959	1.24045e-50	7.51292e-50	-0.725413	0.00101666	0.00236852	-1.84476	1.71108e-16	1.13281e-15	-1.98031	5.12994e-31	5.02057e-30	-2.16642	2.7297e-19	1.05719e-18	chrIV	316971	320120	3150	-	TATA-less	1_mis	TFIID-dominated	TAF1-enriched	NA	TFIID
YDL078C	-2.63984	5.9074e-67	1.43176e-65	-3.0764	6.93683e-86	9.71014e-85	-2.59516	3.05041e-40	1.71349e-39	-4.56784	2.18361e-48	1.03806e-47	-0.69719	1.02446e-06	5.8279e-06	-1.04962	3.0648e-14	1.45795e-13	-0.896654	6.1917e-09	1.06064e-08	-1.15512	2.41888e-09	4.67436e-09	chrIV	315357	316388	1032	-	TATA-containing	0_mis	TFIID-dominated	TAF1-enriched	NA	TFIID
YDL079C	-0.738683	0.0372763	0.0452849	-3.16535	2.74514e-15	3.84971e-15	-1.5145	7.99201e-07	9.90253e-07	-3.3302	7.60266e-10	9.98043e-10	0.229347	0.609838	0.659406	-1.13072	0.00906776	0.0125502	-0.699648	0.0330928	0.0419566	-0.876154	0.0507161	0.0649461	chrIV	312951	314748	1798	-	NA	NA	TFIID-dominated	NA	NA	NA
YDL080C	-1.84657	1.5504e-22	3.97689e-22	-3.01233	1.58824e-52	5.51302e-52	-2.63125	6.25649e-33	1.66848e-32	-4.03806	3.68268e-40	9.15374e-40	-0.947102	0.000212233	0.000612654	-1.78871	1.39685e-12	5.27539e-12	-2.10439	2.08866e-25	1.07365e-24	-2.06345	7.8387e-15	2.12574e-14	chrIV	310642	312471	1830	-	TATA-less	2_mis	TFIID-dominated	TAF1-depleted	NA	TFIID
YDL081C	-2.78656	8.04225e-58	1.35866e-56	-2.62295	1.0762e-50	3.52177e-50	-2.43551	4.71753e-32	1.17579e-31	-3.82763	5.18179e-48	2.35857e-47	-0.0146263	0.905461	0.919996	0.0574258	0.639691	0.689555	-0.0475494	0.755754	0.795672	-0.0864401	0.607553	0.657015	chrIV	309802	310122	321	-	TATA-less	1_mis	TFIID-dominated	TAF1-enriched	RPG	TFIID
YDL082W	-2.7305	9.89361e-59	1.75349e-57	-2.94289	8.72027e-67	5.27446e-66	-2.69328	4.79997e-43	3.75362e-42	-3.55278	1.80262e-41	4.87032e-41	-0.586541	1.20099e-06	6.66812e-06	-0.654406	4.95552e-08	1.09101e-07	-0.417809	0.0093822	0.0122699	-0.595847	0.00120484	0.00172665	chrIV	308424	309388	965	+	TATA-less	2_mis	TFIID-dominated	TAF1-enriched	RPG	TFIID
YDL083C	-3.16579	1.93045e-82	8.8273e-81	-3.02693	3.90315e-74	3.16077e-73	-2.93501	7.12446e-49	1.22522e-47	-3.4404	1.67852e-31	2.93056e-31	-0.0903159	0.485113	0.542591	-0.0722135	0.575557	0.630394	-0.121285	0.480606	0.538894	-0.461974	0.00766204	0.0104587	chrIV	306926	307789	864	-	TATA-less	1_mis	TFIID-dominated	TAF1-enriched	RPG	TFIID
YDL084W	-2.03928	1.64386e-51	2.06506e-50	-2.50644	4.97174e-76	4.31115e-75	-2.36812	6.0222e-32	1.4866e-31	-3.1141	5.53849e-37	1.17442e-36	0.0299626	0.79401	0.821753	-0.0764111	0.50371	0.56043	-0.1547	0.295245	0.342909	-0.0379923	0.846949	0.86458	chrIV	305237	306577	1341	+	TATA-less	1_mis	TFIID-dominated	TAF1-enriched	NA	TFIID
YDL085W	-2.18072	0.000810845	0.00102973	-2.91709	2.55951e-05	3.23071e-05	-1.7088	0.000675779	0.000807478	-1.93219	0.126218	0.145094	-0.593233	0.302921	0.360686	-0.365594	0.524554	0.581643	-1.4898	0.0532557	0.0667026	-0.380823	0.765595	0.790816	chrIV	303211	304848	1638	+	NA	NA	TFIID-dominated	NA	NA	NA
YDL087C	-1.43283	1.74843e-11	2.63746e-11	-2.16566	4.31446e-23	6.77647e-23	-2.36607	1.54209e-23	2.41315e-23	-3.68359	8.61096e-25	1.31238e-24	-0.774277	0.0163937	0.0270217	-1.27583	5.30625e-05	8.71846e-05	-1.7864	7.96252e-08	1.3014e-07	-2.35447	1.36202e-06	2.2824e-06	chrIV	300214	300999	786	-	TATA-less	1_mis	TFIID-dominated	TAF1-enriched	NA	TFIID
YDL088C	-1.20871	3.13909e-13	5.06374e-13	-1.76541	5.24561e-26	8.61787e-26	-2.00052	1.20228e-20	1.74162e-20	-3.46282	2.01412e-34	3.85606e-34	-0.365196	0.0545397	0.078569	-1.16779	3.91775e-10	1.08954e-09	-1.49888	5.19223e-13	1.0676e-12	-2.15547	5.79251e-13	1.38893e-12	chrIV	298417	300003	1587	-	TATA-less	1_mis	TFIID-dominated	TAF1-depleted	NA	TFIID
YDL089W	-1.96902	4.18391e-21	9.86506e-21	-3.242	5.83659e-50	1.86114e-49	-2.76345	7.22084e-42	4.9068e-41	-4.18863	2.09467e-34	4.00572e-34	-0.585632	0.0295281	0.0456059	-1.32256	7.6724e-07	1.50345e-06	-1.73933	5.23721e-17	1.34925e-16	-2.50039	4.9492e-17	1.58618e-16	chrIV	296820	298274	1455	+	TATA-less	2_mis	TFIID-dominated	TAF1-enriched	NA	TFIID
YDL090C	-2.20553	1.73656e-32	7.8054e-32	-2.93975	2.04398e-52	7.04504e-52	-2.96352	2.96891e-45	3.10648e-44	-4.4238	4.81774e-47	2.01717e-46	-1.09626	6.42839e-05	0.000217641	-2.10762	2.00332e-14	9.78621e-14	-2.64261	1.51539e-35	2.55228e-34	-3.00925	1.19947e-27	1.07163e-26	chrIV	295034	296329	1296	-	NA	NA	TFIID-dominated	NA	NA	TFIID
YDL091C	-1.5045	5.02561e-15	8.75335e-15	-3.01832	1.08669e-49	3.42065e-49	-2.39906	4.2605e-25	7.01404e-25	-4.10265	3.30651e-35	6.50589e-35	-0.671352	0.0191731	0.0310748	-1.75416	6.05149e-10	1.65273e-09	-1.94817	8.20275e-16	1.95558e-15	-2.74106	4.66341e-15	1.28116e-14	chrIV	293392	294759	1368	-	TATA-less	2_mis	TFIID-dominated	TAF1-enriched	NA	TFIID
YDL092W	-1.76284	7.4122e-25	2.15334e-24	-2.46433	1.39815e-43	3.58501e-43	-2.45012	3.30581e-32	8.32598e-32	-3.93468	1.23473e-38	2.80718e-38	-0.848287	1.57545e-05	6.37923e-05	-1.35899	2.19151e-12	8.11704e-12	-1.77922	2.72402e-24	1.25567e-23	-2.74573	1.84273e-33	3.17105e-32	chrIV	292781	293221	441	+	TATA-less	2_mis	TFIID-dominated	TAF1-enriched	NA	TFIID
YDL093W	-1.93058	1.79034e-30	7.24052e-30	-2.36556	5.21511e-41	1.2373e-40	-2.4883	2.16894e-28	4.20557e-28	-3.35784	4.95386e-32	8.7902e-32	-0.603575	0.00263442	0.00542493	-0.534649	0.00715782	0.00999772	-1.3341	1.05712e-12	2.13785e-12	-1.30487	1.14421e-07	2.02018e-07	chrIV	289909	292140	2232	+	TATA-less	1_mis	TFIID-dominated	TAF1-enriched	NA	TFIID
YDL095W	-2.50255	6.12746e-72	1.80379e-70	-2.76363	8.30628e-86	1.15329e-84	-2.69144	4.50145e-39	2.20374e-38	-4.15628	3.35204e-52	2.4167e-51	-0.844426	2.20952e-12	4.6292e-11	-0.935642	3.58304e-15	1.92736e-14	-1.03147	3.02889e-09	5.24783e-09	-1.02655	1.2259e-07	2.1609e-07	chrIV	287059	289512	2454	+	TATA-less	2_mis	TFIID-dominated	TAF1-enriched	NA	TFIID
YDL097C	-1.50462	9.3025e-25	2.68543e-24	-2.98085	2.0432e-90	3.63064e-89	-2.58573	6.84141e-38	2.95463e-37	-4.16029	2.62377e-58	4.00155e-57	-0.588003	5.57805e-05	0.000192321	-1.53468	9.91502e-27	2.72496e-25	-2.00464	5.54708e-38	1.28212e-36	-2.66065	1.96305e-34	3.9273e-33	chrIV	285391	286695	1305	-	TATA-less	1_mis	TFIID-dominated	TAF1-enriched	NA	TFIID
YDL098C	-2.54074	8.22792e-22	2.01483e-21	-4.84248	3.0362e-47	8.73179e-47	-3.47377	1.90385e-40	1.09984e-39	-5.84067	2.47225e-28	4.0148e-28	-2.41842	2.70757e-09	3.09643e-08	-2.24422	5.07408e-09	1.24961e-08	-2.93342	1.56161e-19	4.88651e-19	-4.0705	3.79733e-15	1.05254e-14	chrIV	284581	285165	585	-	NA	NA	TFIID-dominated	NA	NA	TFIID
YDL099W	-1.20939	3.13763e-12	4.87232e-12	-3.19159	3.61251e-69	2.41975e-68	-2.54998	4.00861e-27	7.26249e-27	-4.00103	1.67352e-42	4.83758e-42	-0.533955	0.0114302	0.0196146	-1.39167	1.30478e-11	4.37893e-11	-1.61594	9.21187e-16	2.19055e-15	-2.32779	1.59757e-17	5.35701e-17	chrIV	283419	284444	1026	+	NA	NA	TFIID-dominated	NA	NA	TFIID
YDL100C	-1.92372	4.49173e-38	2.77807e-37	-2.65115	1.36351e-69	9.28727e-69	-2.54459	1.53097e-37	6.34626e-37	-4.16532	2.58659e-63	7.03072e-62	-0.117293	0.296686	0.353919	-0.57031	2.5733e-07	5.27481e-07	-0.37326	0.0126693	0.0164401	-0.4706	0.0110329	0.0149164	chrIV	282112	283176	1065	-	TATA-less	2_mis	TFIID-dominated	TAF1-enriched	NA	TFIID
YDL101C	-1.76174	1.08665e-18	2.2627e-18	-2.22591	2.74308e-27	4.6228e-27	-2.68681	2.82505e-40	1.59492e-39	-4.29627	9.05523e-50	4.95686e-49	-0.556024	0.0194168	0.0314275	-0.89983	0.000139978	0.000221856	-2.26766	3.6573e-26	2.04972e-25	-2.81061	1.66577e-21	7.91848e-21	chrIV	280307	281848	1542	-	TATA-less	2_mis	TFIID-dominated	TAF1-enriched	NA	TFIID
YDL102W	-1.63532	1.18532e-29	4.60107e-29	-2.3853	1.80098e-58	7.84811e-58	-2.75883	1.76646e-38	8.12041e-38	-4.21169	4.03331e-52	2.8924e-51	-0.229321	0.140109	0.182551	-0.647623	2.6996e-05	4.53818e-05	-1.11592	5.68143e-12	1.11006e-11	-1.01789	9.11491e-07	1.54249e-06	chrIV	276872	280165	3294	+	TATA-less	1_mis	TFIID-dominated	TAF1-enriched	NA	TFIID
YDL103C	-2.09681	1.27259e-47	1.35539e-46	-3.00855	1.63905e-89	2.74201e-88	-2.88101	1.68296e-48	2.77337e-47	-4.5692	2.13207e-54	1.96343e-53	-0.401305	0.00684139	0.0124885	-1.02703	2.31706e-12	8.54817e-12	-1.17791	1.23357e-14	2.76398e-14	-1.24815	3.89732e-10	7.89879e-10	chrIV	275148	276581	1434	-	TATA-less	1_mis	TFIID-dominated	TAF1-depleted	NA	TFIID
YDL104C	-3.12715	1.56839e-27	5.33877e-27	-4.94977	1.64279e-44	4.32382e-44	-3.80896	9.15479e-59	6.60228e-57	-4.87817	2.85633e-34	5.43606e-34	-1.82857	0.000134795	0.000411852	-1.95545	2.07222e-05	3.51971e-05	-3.52845	9.24351e-28	6.19211e-27	-3.76313	4.14617e-14	1.07222e-13	chrIV	273653	274876	1224	-	TATA-less	2_mis	TFIID-dominated	TAF1-depleted	NA	TFIID
YDL105W	-1.21951	4.60418e-08	6.34265e-08	-1.57245	1.56667e-11	2.11573e-11	-2.62971	2.80682e-30	6.09235e-30	-4.03703	1.65842e-35	3.29776e-35	-0.0269879	0.927366	0.939712	-0.486287	0.102449	0.128869	-2.14749	4.03524e-15	9.29716e-15	-2.16598	1.91923e-09	3.73536e-09	chrIV	272389	273597	1209	+	TATA-less	1_mis	TFIID-dominated	TAF1-enriched	NA	TFIID
YDL106C	-0.924249	9.69889e-08	1.32757e-07	-2.10055	5.87218e-33	1.12538e-32	-1.89148	1.60411e-18	2.22565e-18	-3.22579	3.80347e-27	6.03132e-27	-0.46024	0.03557	0.0538611	-0.766771	0.000315425	0.000488794	-1.17984	4.27025e-07	6.73772e-07	-1.74811	4.22451e-08	7.62797e-08	chrIV	270222	271901	1680	-	TATA-less	1_mis	TFIID-dominated	TAF1-enriched	NA	TFIID
YDL107W	-2.82549	5.01981e-24	1.39849e-23	-4.93699	4.46116e-47	1.27443e-46	-3.48962	6.08583e-47	7.89509e-46	-4.83356	1.49253e-33	2.77013e-33	-1.63268	0.000100047	0.000321016	-2.05608	6.23693e-07	1.23287e-06	-3.209	2.7977e-26	1.59401e-25	-3.59491	1.96065e-15	5.53806e-15	chrIV	268921	269976	1056	+	NA	NA	SAGA-dominated	NA	NA	TFIID
YDL108W	-1.85064	1.13268e-19	2.4861e-19	-2.58093	9.45947e-34	1.84851e-33	-2.64475	7.29168e-38	3.13898e-37	-4.29657	8.1653e-39	1.87474e-38	-0.904912	0.000799652	0.00193338	-1.27271	1.11401e-06	2.14316e-06	-1.76433	1.91964e-17	5.09248e-17	-2.2401	1.30447e-15	3.73474e-15	chrIV	267698	268699	1002	+	TATA-less	2_mis	TFIID-dominated	TAF1-enriched	NA	TFIID
YDL110C	-2.34762	4.01015e-35	2.1061e-34	-3.43704	4.58529e-69	3.06236e-68	-2.30176	1.17612e-25	1.98397e-25	-4.57502	1.21963e-45	4.51484e-45	-0.974588	8.22073e-05	0.000270264	-1.56288	1.82264e-11	5.99691e-11	-1.40507	1.67356e-07	2.68942e-07	-3.20545	1.24706e-22	6.4756e-22	chrIV	264512	264964	453	-	TATA-containing	0_mis	SAGA-dominated	TAF1-depleted	NA	CR
YDL111C	-1.8029	1.08745e-25	3.36134e-25	-1.93308	1.68309e-28	2.91892e-28	-2.75645	1.13803e-48	1.91778e-47	-4.07209	1.6195e-49	8.63008e-49	-0.83669	7.97756e-06	3.55853e-05	-1.56287	1.04041e-16	7.05946e-16	-2.4414	2.42465e-41	8.31781e-40	-3.40979	6.51318e-44	3.39832e-42	chrIV	263313	264110	798	-	TATA-less	2_mis	TFIID-dominated	TAF1-enriched	NA	TFIID
YDL112W	-1.60971	4.10296e-32	1.81212e-31	-1.85722	2.20801e-41	5.29165e-41	-2.28629	3.48806e-25	5.76218e-25	-3.56713	2.70312e-41	7.23371e-41	-0.379007	0.0138664	0.0232771	-0.236536	0.123356	0.153748	-0.795199	1.69147e-07	2.71685e-07	-0.682801	0.000806306	0.00116861	chrIV	258915	263225	4311	+	TATA-less	1_mis	TFIID-dominated	TAF1-enriched	NA	TFIID
YDL113C	-1.13432	1.46591e-12	2.30348e-12	-2.24621	6.10599e-43	1.53805e-42	-2.23344	3.49908e-29	7.10731e-29	-3.53945	2.1868e-42	6.26753e-42	-0.427847	0.0557716	0.0801326	-1.05137	9.81818e-07	1.90227e-06	-1.77323	1.8216e-25	9.40822e-25	-2.19273	4.14199e-22	2.06688e-21	chrIV	256633	258555	1923	-	NA	NA	SAGA-dominated	NA	NA	TFIID
YDL115C	-1.19604	9.29543e-08	1.27286e-07	-3.91039	3.87321e-60	1.78537e-59	-2.40843	6.78756e-26	1.16015e-25	-4.07822	5.3501e-44	1.71575e-43	-0.507923	0.0664545	0.0938888	-1.57253	3.05617e-09	7.70343e-09	-2.03572	6.39971e-29	4.91902e-28	-2.65203	5.28715e-24	3.17814e-23	chrIV	253995	255126	1132	-	TATA-less	2_mis	TFIID-dominated	TAF1-enriched	NA	TFIID
YDL116W	-1.26137	8.7441e-18	1.74704e-17	-1.97758	9.43787e-41	2.22684e-40	-2.23108	4.01821e-27	7.27791e-27	-3.69971	6.99196e-43	2.06904e-42	-0.312238	0.05243	0.0757658	-0.975807	9.98514e-10	2.65823e-09	-1.72577	6.55346e-29	5.01944e-28	-2.51634	1.82507e-24	1.15543e-23	chrIV	251566	253746	2181	+	TATA-less	1_mis	TFIID-dominated	TAF1-enriched	NA	TFIID
YDL117W	-1.54053	1.85646e-21	4.45381e-21	-2.11369	2.01385e-38	4.44148e-38	-2.07617	3.94454e-23	6.09867e-23	-3.52168	1.37827e-41	3.7524e-41	-0.652001	0.000395164	0.00104629	-1.3062	8.75084e-13	3.40913e-12	-1.73871	4.06949e-23	1.68199e-22	-2.19843	1.13219e-25	8.28751e-25	chrIV	248581	251238	2658	+	TATA-less	1_mis	TFIID-dominated	TAF1-depleted	NA	CR
YDL119C	-2.13263	1.99401e-14	3.37869e-14	-4.63862	6.61506e-40	1.51444e-39	-3.25666	1.26698e-41	8.4386e-41	-4.38113	1.01189e-33	1.88689e-33	-0.684271	0.0813242	0.112182	-2.50346	2.84844e-10	8.08076e-10	-2.7185	4.75669e-24	2.14265e-23	-3.05621	1.91725e-14	5.09132e-14	chrIV	246689	247612	924	-	TATA-less	1_mis	TFIID-dominated	TAF1-enriched	NA	TFIID
YDL120W	-1.2344	7.95096e-09	1.11502e-08	-1.58384	3.5082e-13	4.81737e-13	-1.66591	1.13611e-14	1.50502e-14	-3.25749	4.72456e-25	7.23003e-25	0.247948	0.187619	0.236114	-0.583726	0.00175217	0.00256379	-1.01384	3.14759e-06	4.81369e-06	-1.90896	2.09834e-12	4.84953e-12	chrIV	245923	246447	525	+	TATA-less	2_mis	TFIID-dominated	TAF1-enriched	NA	TFIID
YDL121C	-1.64716	5.29855e-13	8.47151e-13	-2.11649	1.23844e-19	1.84903e-19	-2.30152	6.26492e-27	1.1223e-26	-3.99051	1.36814e-40	3.48945e-40	-0.42838	0.0426156	0.0631619	-0.979058	2.51433e-06	4.66163e-06	-0.877128	3.77281e-07	5.96873e-07	-1.13823	4.52243e-08	8.15238e-08	chrIV	245133	245582	450	-	TATA-less	2_mis	TFIID-dominated	TAF1-enriched	NA	TFIID
YDL122W	-1.8429	1.41505e-37	8.54384e-37	-2.58998	6.85062e-71	4.90977e-70	-2.49847	1.35749e-29	2.81728e-29	-3.91405	1.65562e-44	5.52503e-44	-0.809707	2.04545e-07	1.43851e-06	-1.25277	8.47714e-16	4.94198e-15	-2.04829	4.31608e-36	7.85816e-35	-2.63292	2.92229e-34	5.67237e-33	chrIV	242552	244981	2430	+	NA	NA	TFIID-dominated	NA	NA	TFIID
YDL123W	-1.28037	2.053e-07	2.78622e-07	-1.42294	1.3123e-08	1.71841e-08	-1.06328	0.000844676	0.00100769	-3.46382	8.01541e-11	1.06028e-10	-0.63305	0.0472321	0.0692023	-0.599602	0.0459755	0.0600131	0.271962	0.75818	0.797968	-0.605015	0.63141	0.680221	chrIV	241418	241840	423	+	TATA-containing	0_mis	TFIID-dominated	TAF1-enriched	NA	CR
YDL124W	-3.55526	3.88718e-83	1.83877e-81	-5.76804	4.47448e-211	3.41005e-208	-3.30169	2.32201e-74	8.26843e-72	-5.06071	1.04043e-82	3.33977e-80	-1.29599	5.66787e-13	1.32097e-11	-2.85169	1.0693e-57	1.39885e-54	-2.59339	1.0078e-47	8.31502e-46	-3.14816	4.21709e-55	4.91141e-53	chrIV	240259	241197	939	+	TATA-containing	0_mis	SAGA-dominated	TAF1-depleted	NA	CR
YDL125C	-2.35986	1.05931e-39	7.18674e-39	-2.65118	2.84967e-48	8.51301e-48	-2.61116	7.68029e-36	2.64706e-35	-4.30048	2.06466e-50	1.22301e-49	-0.412923	0.00651763	0.0119775	-0.814637	3.31999e-08	7.45745e-08	-0.833509	4.98628e-07	7.84848e-07	-1.19579	3.07093e-09	5.8977e-09	chrIV	239019	239606	588	-	TATA-less	1_mis	TFIID-dominated	TAF1-depleted	NA	CR
YDL126C	-1.82916	3.64331e-32	1.61535e-31	-2.98607	1.55036e-82	1.80236e-81	-2.49369	2.80144e-40	1.58425e-39	-4.07969	1.02725e-61	2.32373e-60	-0.157389	0.115757	0.153721	-0.497382	5.77234e-07	1.14484e-06	-0.483082	0.000713622	0.000985255	-0.395281	0.0326344	0.0424918	chrIV	236157	238664	2508	-	TATA-less	1_mis	TFIID-dominated	TAF1-enriched	NA	TFIID
YDL127W	-2.18164	4.76393e-36	2.63302e-35	-2.05812	3.11904e-30	5.62246e-30	-2.85779	1.44124e-27	2.67324e-27	-4.15529	1.30317e-27	2.08415e-27	-1.37585	3.12773e-08	2.72172e-07	-1.6294	5.41926e-11	1.692e-10	-2.89518	2.98437e-07	4.74211e-07	-3.58238	5.55731e-06	9.00938e-06	chrIV	234927	235853	927	+	TATA-containing	0_mis	TFIID-dominated	TAF1-depleted	NA	CR
YDL128W	-2.67368	4.64326e-55	6.87864e-54	-2.88109	2.57404e-62	1.27845e-61	-2.94632	2.07176e-46	2.50365e-45	-4.05415	1.33997e-42	3.90015e-42	-1.24244	4.56163e-13	1.08845e-11	-1.2588	1.97952e-14	9.67714e-14	-1.57744	4.32809e-15	9.9578e-15	-2.14763	1.28699e-19	5.1244e-19	chrIV	232652	233887	1236	+	TATA-less	1_mis	TFIID-dominated	TAF1-enriched	NA	TFIID
YDL129W	-1.45805	5.80764e-11	8.61475e-11	-1.26829	4.32437e-08	5.63038e-08	-2.4385	6.72851e-24	1.06409e-23	-3.45805	5.60792e-20	8.0449e-20	-0.827217	0.0149282	0.0248652	-1.04522	0.00225864	0.00327796	-2.04371	3.63885e-14	7.97244e-14	-2.50344	6.03089e-10	1.21063e-09	chrIV	231024	231899	876	+	TATA-less	2_mis	TFIID-dominated	TAF1-enriched	NA	TFIID
YDL130W	-2.98582	7.4004e-38	4.52804e-37	-2.61929	3.9481e-29	6.92584e-29	-2.55061	3.02608e-35	9.87636e-35	-2.85596	2.04342e-27	3.25489e-27	0.0830149	0.506397	0.563696	0.0235433	0.849782	0.877692	-0.123615	0.416864	0.473944	-0.0673548	0.686446	0.730819	chrIV	229906	230527	622	+	TATA-less	2_mis	TFIID-dominated	TAF1-enriched	RPG	TFIID
YDL130W-A	-2.82639	2.03388e-25	6.15368e-25	-4.38571	1.15097e-45	3.12158e-45	-3.29125	2.77863e-16	3.74147e-16	-4.6381	4.98397e-14	6.74367e-14	-0.713668	0.0102205	0.0177618	-1.63763	2.34945e-09	5.98899e-09	-1.6558	0.0025755	0.00345983	-1.78592	8.28796e-05	0.000126561	chrIV	229171	229431	261	+	TATA-less	1_mis	NA	TAF1-enriched	NA	TFIID
YDL131W	-2.43094	6.31135e-50	7.51555e-49	-2.85369	1.27914e-66	7.66924e-66	-2.98436	3.49149e-38	1.55598e-37	-4.29211	1.11837e-32	2.0217e-32	-0.892981	1.20582e-08	1.17704e-07	-1.30143	5.67487e-18	4.63413e-17	-1.87692	2.10925e-10	3.83704e-10	-1.49576	0.00253188	0.0035504	chrIV	227393	228715	1323	+	TATA-containing	0_mis	SAGA-dominated	TAF1-depleted	NA	TFIID
YDL132W	-1.04544	2.82724e-14	4.75995e-14	-2.07336	4.11436e-51	1.36199e-50	-1.77175	5.29838e-18	7.30297e-18	-3.28882	2.48566e-38	5.57043e-38	0.26553	0.0700777	0.0983837	-0.28174	0.0505596	0.0656693	-0.681842	9.56778e-06	1.431e-05	-0.92269	4.60851e-06	7.50479e-06	chrIV	224304	226751	2448	+	TATA-less	3_mis	TFIID-dominated	TAF1-enriched	NA	TFIID
YDL133C-A	-3.14963	1.25523e-41	9.65204e-41	-3.20788	8.11976e-38	1.75412e-37	-1.81204	6.06962e-06	7.44359e-06	-2.01821	1.55548e-10	2.05276e-10	-0.306506	0.314325	0.372495	0.213959	0.481364	0.537304	-0.167854	0.514266	0.573872	-0.620648	0.00415027	0.00576653	chrIV	221724	221801	78	-	TATA-containing	0_mis	nocall	TAF1-enriched	RPG	TFIID
YDL133W	-1.51279	7.97114e-16	1.44183e-15	-2.33611	4.26937e-34	8.39313e-34	-2.47072	6.23699e-36	2.17533e-35	-4.03551	1.28897e-42	3.75495e-42	-0.592154	0.0160177	0.0264309	-1.06196	7.74927e-06	1.36921e-05	-1.91383	1.43531e-24	6.80982e-24	-2.64278	3.31752e-24	2.03163e-23	chrIV	222427	223740	1314	+	NA	NA	TFIID-dominated	NA	NA	TFIID
YDL134C	-1.3289	1.70931e-18	3.52712e-18	-1.89054	2.60097e-35	5.27033e-35	-2.11539	2.21384e-27	4.068e-27	-3.69411	4.36877e-47	1.83416e-46	-0.0968838	0.51956	0.575767	-0.948686	1.45013e-10	4.27265e-10	-1.53684	1.95491e-18	5.64811e-18	-2.15552	1.64641e-19	6.49208e-19	chrIV	219662	220771	1110	-	NA	NA	TFIID-dominated	NA	NA	TFIID
YDL135C	-2.40515	5.35765e-49	6.03417e-48	-3.74839	9.09115e-103	2.87356e-101	-2.92736	5.64697e-45	5.74723e-44	-4.37059	3.39084e-45	1.2024e-44	-1.43975	2.18577e-16	9.32132e-15	-1.64127	8.34628e-23	1.51227e-21	-1.55075	9.36529e-20	2.99084e-19	-1.9399	4.7491e-17	1.52412e-16	chrIV	218680	219288	609	-	TATA-less	1_mis	TFIID-dominated	TAF1-enriched	NA	TFIID
YDL136W	-2.76103	5.40589e-40	3.74914e-39	-2.52039	4.43339e-33	8.52259e-33	-2.78573	1.30501e-40	7.69805e-40	-3.21632	4.42124e-34	8.35537e-34	-0.328615	0.00497714	0.00948876	-0.320489	0.00576807	0.00811026	0.0578631	0.740862	0.781888	-0.127696	0.454532	0.510585	chrIV	217600	218367	768	+	TATA-less	2_mis	TFIID-dominated	TAF1-enriched	RPG	TFIID
YDL137W	-2.37351	6.6878e-55	9.84369e-54	-3.0457	7.72728e-86	1.07726e-84	-2.58325	3.88813e-38	1.72929e-37	-3.95754	5.17873e-52	3.65548e-51	-0.22316	0.0653622	0.0924977	-0.572661	1.67306e-06	3.15556e-06	-0.443891	0.003703	0.00493784	-0.499036	0.00652502	0.00895354	chrIV	216529	217074	546	+	NA	NA	TFIID-dominated	NA	NA	TFIID
YDL138W	-2.44281	2.79478e-37	1.65969e-36	-3.35676	3.26972e-64	1.7771e-63	-3.05949	4.10614e-45	4.26975e-44	-4.49617	2.88204e-53	2.30734e-52	-1.44623	5.2377e-06	2.46049e-05	-2.0579	3.65157e-11	1.16059e-10	-2.68464	1.02135e-31	1.08247e-30	-2.83426	3.05905e-21	1.40898e-20	chrIV	213351	215642	2292	+	TATA-less	1_mis	TFIID-dominated	TAF1-depleted	NA	TFIID
YDL139C	-1.64126	2.17025e-08	3.01087e-08	-2.54627	4.44399e-15	6.21306e-15	-2.87003	8.73936e-25	1.41925e-24	-4.01394	4.30564e-14	5.82817e-14	-0.813982	0.051605	0.0747893	-0.930252	0.0214957	0.0288477	-2.47153	3.65334e-10	6.57259e-10	-2.87759	1.52652e-05	2.42828e-05	chrIV	211375	212046	672	-	TATA-less	1_mis	TFIID-dominated	TAF1-enriched	NA	TFIID
YDL140C	-1.57135	3.91106e-28	1.37852e-27	-2.41475	5.91779e-64	3.17358e-63	-2.49548	5.55657e-36	1.94814e-35	-3.48578	5.92379e-49	2.98671e-48	0.35985	0.00133427	0.00299956	0.284289	0.010823	0.0148945	-0.268098	0.100743	0.12322	-0.282952	0.102331	0.126738	chrIV	205360	210561	5202	-	NA	NA	TFIID-dominated	NA	NA	TFIID
YDL141W	-1.43469	2.57667e-19	5.53851e-19	-2.45687	6.83497e-52	2.31055e-51	-2.26273	5.77585e-29	1.15776e-28	-3.63428	1.66443e-40	4.21961e-40	-0.587354	0.000989777	0.00231938	-1.36098	7.83883e-15	4.03413e-14	-1.60599	8.15494e-17	2.07957e-16	-2.072	2.99849e-16	9.04541e-16	chrIV	203039	205111	2073	+	TATA-less	2_mis	TFIID-dominated	TAF1-enriched	NA	TFIID
YDL142C	-1.27283	1.35222e-10	1.98776e-10	-2.37986	3.33165e-31	6.13635e-31	-2.34102	1.55995e-28	3.04765e-28	-3.94263	4.49402e-32	7.98686e-32	-0.386529	0.208434	0.25927	-1.70311	6.09145e-09	1.48783e-08	-1.88609	5.37869e-16	1.30183e-15	-3.1086	1.37309e-20	5.93064e-20	chrIV	201719	202570	852	-	NA	NA	TFIID-dominated	NA	NA	TFIID
YDL143W	-1.76134	5.4774e-25	1.6076e-24	-2.52171	5.53092e-49	1.69058e-48	-2.40798	6.26245e-38	2.71508e-37	-3.75157	3.81901e-51	2.4545e-50	-0.487979	5.41988e-05	0.000187729	-0.909941	1.88275e-14	9.23166e-14	-1.1325	6.3019e-14	1.36374e-13	-1.12965	6.01546e-09	1.13784e-08	chrIV	199996	201582	1587	+	TATA-less	2_mis	TFIID-dominated	TAF1-enriched	NA	TFIID
YDL144C	-2.66138	2.66413e-20	6.05274e-20	-5.12706	1.06734e-58	4.69289e-58	-3.59047	8.2158e-70	2.20414e-67	-4.76478	1.08924e-48	5.34317e-48	-1.59663	6.94248e-10	9.11466e-09	-2.16891	2.6729e-18	2.27946e-17	-2.39797	1.65038e-36	3.1826e-35	-2.76381	7.82022e-27	6.38342e-26	chrIV	198662	199732	1071	-	TATA-less	2_mis	TFIID-dominated	TAF1-enriched	NA	NA
YDL145C	-1.90944	1.61604e-42	1.31022e-41	-2.2901	3.86397e-60	1.78231e-59	-2.39346	6.89294e-32	1.68973e-31	-3.62024	1.52212e-42	4.41506e-42	0.181864	0.102927	0.138332	-0.190759	0.0856623	0.108821	-0.228291	0.11843	0.143936	-0.205292	0.273034	0.320909	chrIV	194571	198176	3606	-	TATA-less	1_mis	TFIID-dominated	TAF1-enriched	NA	TFIID
YDL146W	-1.30666	4.04103e-11	6.02029e-11	-3.01584	2.74162e-49	8.47443e-49	-2.44653	1.82278e-32	4.71113e-32	-3.50856	3.04404e-32	5.42711e-32	-0.401504	0.0918496	0.124812	-1.40637	3.10393e-09	7.80876e-09	-2.07053	1.2155e-18	3.56392e-18	-1.78018	2.27066e-09	4.39834e-09	chrIV	192750	194225	1476	+	TATA-less	1_mis	TFIID-dominated	TAF1-enriched	NA	TFIID
YDL147W	-1.24481	1.66854e-18	3.44508e-18	-2.72828	9.78942e-82	1.09358e-80	-2.40901	7.17933e-29	1.42926e-28	-3.77649	1.32837e-52	9.97167e-52	-0.293778	0.0198719	0.0321122	-1.20671	3.29456e-22	5.29477e-21	-1.73916	4.84896e-30	4.22534e-29	-2.29344	9.1489e-32	1.29154e-30	chrIV	190924	192261	1338	+	TATA-less	2_mis	TFIID-dominated	TAF1-enriched	NA	TFIID
YDL148C	-1.20476	4.35674e-15	7.61346e-15	-1.39198	3.15015e-19	4.66974e-19	-1.90113	7.45677e-17	1.01281e-16	-3.08549	6.32423e-33	1.15221e-32	-0.301599	0.0706468	0.0990814	0.0260788	0.875673	0.901019	-0.944867	6.99235e-10	1.24389e-09	-0.889888	1.58827e-05	2.52344e-05	chrIV	188154	190586	2433	-	TATA-less	2_mis	TFIID-dominated	TAF1-enriched	NA	TFIID
YDL149W	-1.92493	3.83551e-26	1.21346e-25	-3.76741	1.65509e-83	2.04915e-82	-2.8093	2.32272e-38	1.05689e-37	-4.25528	1.7658e-54	1.65094e-53	-0.566635	0.043621	0.0645248	-1.97994	4.78352e-13	1.92666e-12	-2.53407	5.85257e-37	1.18838e-35	-2.93865	4.12715e-26	3.14087e-25	chrIV	184925	187918	2994	+	NA	NA	TFIID-dominated	NA	NA	TFIID
YDL150W	-1.43074	2.9662e-15	5.22609e-15	-2.09249	1.77388e-29	3.13665e-29	-2.35081	5.01184e-28	9.52519e-28	-3.88328	1.04301e-42	3.05163e-42	-0.678199	0.000685274	0.00168875	-1.18692	4.1849e-09	1.03687e-08	-1.94301	7.19662e-21	2.50977e-20	-2.42093	1.37189e-16	4.25463e-16	chrIV	183343	184611	1269	+	TATA-less	1_mis	TFIID-dominated	TAF1-enriched	NA	TFIID
YDL153C	-1.25051	1.69835e-08	2.36049e-08	-2.55453	5.33856e-28	9.12237e-28	-2.25798	1.03367e-22	1.57851e-22	-3.01289	4.87305e-33	8.924e-33	-0.786481	5.73676e-05	0.000197228	-0.116675	0.54754	0.604113	-0.939978	3.29984e-09	5.70664e-09	-0.986347	4.62606e-06	7.52962e-06	chrIV	181186	183018	1833	-	TATA-containing	0_mis	TFIID-dominated	TAF1-enriched	NA	TFIID
YDL154W	-1.04773	2.4457e-07	3.31589e-07	-1.92069	1.89508e-19	2.8245e-19	-1.48173	1.46678e-10	1.87313e-10	-2.5681	2.32447e-16	3.21552e-16	0.126301	0.6776	0.722029	-0.663714	0.0288439	0.0383471	-1.30357	2.24501e-09	3.91172e-09	-0.884741	0.00614238	0.00843736	chrIV	178334	181039	2706	+	NA	NA	TFIID-dominated	NA	NA	NA
YDL155W	-2.1231	1.53045e-33	7.31015e-33	-2.69715	9.52168e-51	3.12185e-50	-2.78417	4.70839e-44	4.24451e-43	-4.23713	2.51032e-56	2.90757e-55	-1.31242	1.06224e-10	1.64619e-09	-1.75524	1.9353e-18	1.69235e-17	-2.63599	2.65766e-36	4.93522e-35	-2.93792	2.32868e-26	1.81888e-25	chrIV	176773	178056	1284	+	TATA-less	1_mis	TFIID-dominated	TAF1-enriched	NA	TFIID
YDL156W	-1.81915	2.81306e-20	6.38266e-20	-2.62265	2.41676e-37	5.15601e-37	-2.80295	3.10097e-39	1.54175e-38	-4.31268	1.1726e-47	5.14952e-47	-1.01545	0.000143927	0.000437087	-1.61674	2.17269e-09	5.56881e-09	-2.59019	1.49873e-28	1.10506e-27	-4.03809	2.34451e-23	1.31932e-22	chrIV	174918	176486	1569	+	TATA-less	1_mis	TFIID-dominated	TAF1-enriched	NA	TFIID
YDL159W	-1.25352	1.47542e-12	2.31789e-12	-1.96943	1.51387e-27	2.56006e-27	-2.30895	1.44293e-26	2.53942e-26	-3.72119	1.71026e-33	3.16727e-33	-0.538488	0.0206934	0.0332966	-1.21869	1.27249e-07	2.67977e-07	-1.83223	3.18475e-12	6.29226e-12	-3.1836	1.2844e-10	2.67118e-10	chrIV	172481	174028	1548	+	TATA-less	2_mis	TFIID-dominated	TAF1-enriched	NA	TFIID
YDL160C	-1.50796	8.41488e-25	2.43534e-24	-2.20812	9.45945e-51	3.10293e-50	-2.29406	9.951e-29	1.96471e-28	-3.38395	1.64532e-30	2.81001e-30	0.142722	0.249792	0.30448	-0.307892	0.0119478	0.0163783	-0.622627	0.00026504	0.000373036	-0.631314	0.00156763	0.00222942	chrIV	170410	171930	1521	-	TATA-less	1_mis	TFIID-dominated	TAF1-enriched	NA	TFIID
YDL160C-A	-2.39245	9.73159e-17	1.84135e-16	-3.39946	6.53321e-27	1.09163e-26	-2.68867	5.42138e-15	7.19596e-15	-4.63332	1.23375e-19	1.76126e-19	-1.14259	0.00263129	0.00542034	-2.196	8.73272e-09	2.09617e-08	-2.80947	2.04013e-08	3.41839e-08	-3.33139	9.01378e-12	2.00984e-11	chrIV	169366	169608	243	-	TATA-less	1_mis	NA	TAF1-enriched	NA	TFIID
YDL161W	-1.4364	1.91193e-12	2.99406e-12	-2.4818	1.54616e-32	2.93201e-32	-2.47461	6.3111e-31	1.42954e-30	-3.92587	4.15246e-42	1.17071e-41	-0.850417	1.90228e-05	7.47608e-05	-1.19172	1.1653e-09	3.06976e-09	-1.84535	9.16461e-17	2.33157e-16	-3.08681	3.52206e-25	2.43852e-24	chrIV	167714	169078	1365	+	TATA-less	2_mis	TFIID-dominated	TAF1-enriched	NA	TFIID
YDL164C	-1.94642	2.17679e-36	1.23088e-35	-2.72281	5.06216e-64	2.72324e-63	-2.98184	6.60335e-45	6.70025e-44	-4.61197	3.24629e-60	6.18171e-59	-0.831273	1.20495e-05	5.07736e-05	-0.855103	4.83039e-06	8.69205e-06	-2.02224	4.10949e-31	4.05843e-30	-2.22871	1.86108e-21	8.78288e-21	chrIV	164987	167254	2268	-	TATA-less	1_mis	TFIID-dominated	TAF1-enriched	NA	TFIID
YDL165W	-1.94418	3.46302e-24	9.72281e-24	-2.53409	1.50983e-37	3.23926e-37	-2.60752	6.72107e-36	2.33445e-35	-4.22084	1.13366e-41	3.10272e-41	-0.794453	0.000256254	0.000716678	-1.91467	1.71147e-18	1.51896e-17	-2.03581	5.05066e-29	3.91441e-28	-2.90478	7.87987e-25	5.17548e-24	chrIV	164290	164865	576	+	NA	NA	TFIID-dominated	NA	NA	TFIID
YDL166C	-2.12998	7.59631e-24	2.09839e-23	-2.67885	3.19429e-33	6.16825e-33	-2.57447	4.14163e-37	1.634e-36	-4.05244	6.08871e-36	1.23329e-35	-1.11705	4.2358e-06	2.03922e-05	-1.23534	2.07412e-07	4.28923e-07	-1.89019	1.41446e-20	4.78684e-20	-3.07035	4.33171e-25	2.96447e-24	chrIV	163449	164042	594	-	TATA-containing	0_mis	TFIID-dominated	TAF1-enriched	NA	TFIID
YDL167C	-1.31503	3.58801e-16	6.59084e-16	-1.49063	6.07837e-20	9.11489e-20	-2.00765	7.36131e-21	1.07145e-20	-3.16226	1.90073e-33	3.51422e-33	-0.515421	0.00122151	0.00278322	-0.502745	0.00164231	0.00240967	-1.51498	7.61522e-19	2.26109e-18	-1.65714	2.01665e-13	4.9595e-13	chrIV	160995	163154	2160	-	TATA-less	2_mis	TFIID-dominated	TAF1-enriched	NA	TFIID
YDL168W	-1.8231	0.000221651	0.000284808	-5.20738	6.67847e-26	1.09535e-25	-2.70886	5.08248e-45	5.22025e-44	-4.27032	4.09308e-67	1.73531e-65	-0.635274	5.7217e-05	0.000196822	-1.75877	8.84071e-32	4.42482e-30	-1.76237	3.99252e-34	5.53686e-33	-2.10503	5.02115e-29	5.20635e-28	chrIV	159604	160764	1161	+	TATA-less	1_mis	TFIID-dominated	TAF1-depleted	NA	CR
YDL169C	-2.3613	1.63716e-06	2.18383e-06	-4.34892	2.51029e-15	3.52253e-15	-3.15624	1.34752e-21	1.99731e-21	-3.54952	6.51245e-07	8.34292e-07	-0.48259	0.383061	0.443207	-2.23748	5.0971e-05	8.38535e-05	-3.06244	1.21937e-09	2.14691e-09	-4.22071	4.7925e-06	7.79469e-06	chrIV	158064	158735	672	-	NA	NA	SAGA-dominated	NA	NA	NA
YDL170W	-0.935894	4.81598e-07	6.48465e-07	-1.48367	1.88787e-15	2.65456e-15	-1.80075	7.0723e-16	9.4792e-16	-3.10428	2.17599e-29	3.61379e-29	-0.202059	0.424715	0.484861	-0.569524	0.0184637	0.0249064	-1.56444	3.16108e-13	6.57433e-13	-2.22191	1.55354e-13	3.85988e-13	chrIV	156318	157904	1587	+	TATA-less	2_mis	TFIID-dominated	TAF1-enriched	NA	CR
YDL171C	-2.00183	1.23957e-49	1.43619e-48	-2.03414	6.86567e-51	2.26076e-50	-2.19854	4.24049e-28	8.09041e-28	-3.32321	1.02683e-40	2.63991e-40	-0.0554664	0.601408	0.652402	0.113215	0.283559	0.334673	-0.254693	0.0792292	0.0978802	-0.13169	0.477367	0.533205	chrIV	149203	155640	6438	-	TATA-less	1_mis	TFIID-dominated	TAF1-enriched	NA	TFIID
YDL173W	-1.69461	1.19848e-29	4.6469e-29	-2.30529	4.94575e-51	1.63405e-50	-2.35782	7.02354e-26	1.19987e-25	-4.19104	3.33295e-43	1.01159e-42	-0.285532	0.0764848	0.106287	-1.076	1.15123e-11	3.87754e-11	-1.4618	1.08418e-15	2.5669e-15	-1.78917	8.41873e-12	1.87973e-11	chrIV	148191	149078	888	+	TATA-less	2_mis	TFIID-dominated	TAF1-enriched	NA	TFIID
YDL174C	-2.98443	1.28221e-43	1.09934e-42	-4.55598	7.64887e-88	1.18696e-86	-3.37259	3.51351e-65	5.3557e-63	-4.85565	1.16072e-54	1.12538e-53	-1.74161	2.02161e-16	8.68281e-15	-2.30384	1.48267e-28	5.32864e-27	-2.59305	7.92046e-34	1.06007e-32	-2.94995	5.4057e-26	4.06175e-25	chrIV	145826	147589	1764	-	TATA-containing	0_mis	SAGA-dominated	TAF1-enriched	NA	TFIID
YDL175C	-0.692818	0.000313134	0.000401081	-1.29196	3.7634e-11	5.06041e-11	-1.53025	3.29937e-14	4.34837e-14	-3.08772	3.56746e-26	5.56415e-26	0.101925	0.664317	0.710266	-0.59363	0.0112038	0.0154088	-1.20933	1.41268e-07	2.28257e-07	-1.83027	2.9852e-10	6.09946e-10	chrIV	144484	145518	1035	-	TATA-less	2_mis	TFIID-dominated	TAF1-depleted	NA	TFIID
YDL176W	-1.51031	2.41492e-16	4.46707e-16	-3.1023	3.24471e-57	1.34393e-56	-2.32321	4.97032e-24	7.8883e-24	-4.01471	1.71798e-37	3.72137e-37	-0.8928	0.00158931	0.00350956	-1.72829	1.1243e-09	2.97132e-09	-2.09152	9.16433e-13	1.85853e-12	-2.70188	2.74013e-10	5.60574e-10	chrIV	142097	144223	2127	+	TATA-less	2_mis	TFIID-dominated	TAF1-enriched	NA	TFIID
YDL178W	-2.1686	1.92989e-46	1.92179e-45	-2.93064	7.79056e-78	7.34003e-77	-2.37952	2.22995e-33	6.18322e-33	-4.00256	1.96518e-47	8.46471e-47	-1.01355	1.34546e-08	1.28621e-07	-1.42934	3.82211e-16	2.36971e-15	-1.83221	3.15968e-27	1.97647e-26	-2.19751	5.75811e-25	3.86362e-24	chrIV	139522	141114	1593	+	TATA-less	1_mis	TFIID-dominated	TAF1-enriched	NA	TFIID
YDL179W	-2.52693	4.52414e-37	2.6659e-36	-2.47145	1.73181e-34	3.44305e-34	-2.26459	1.99205e-24	3.19329e-24	-3.49807	7.51163e-32	1.32416e-31	-1.95281	5.45618e-13	1.28156e-11	-1.88631	3.25257e-13	1.34059e-12	-1.84495	4.12564e-11	7.73172e-11	-1.81816	2.85906e-06	4.71712e-06	chrIV	138291	139205	915	+	TATA-less	1_mis	TFIID-dominated	TAF1-depleted	NA	CR
YDL181W	-2.44404	2.23698e-22	5.66179e-22	-2.67328	3.43624e-19	5.08834e-19	-2.24625	2.57679e-08	3.23885e-08	-4.15302	3.61118e-13	4.85694e-13	-0.779582	0.000579375	0.00145218	-1.17274	1.54658e-06	2.9327e-06	-0.664094	0.0623676	0.0777418	-1.19046	6.69907e-05	0.000102682	chrIV	135179	135436	258	+	TATA-less	1_mis	TFIID-dominated	TAF1-depleted	NA	TFIID
YDL182W	-3.01228	3.74508e-50	4.50182e-49	-3.50596	1.75905e-67	1.09984e-66	-2.88298	1.20758e-47	1.74553e-46	-4.26732	1.45218e-58	2.28718e-57	-1.27765	3.39663e-11	5.81879e-10	-2.49087	1.0219e-40	1.19361e-38	-2.56049	9.49968e-17	2.41494e-16	-2.91939	5.92146e-09	1.12039e-08	chrIV	133437	134723	1287	+	TATA-containing	0_mis	SAGA-dominated	TAF1-depleted	NA	CR
YDL183C	-1.74456	1.28849e-08	1.79812e-08	-3.05163	4.98544e-21	7.58375e-21	-2.37504	1.22166e-23	1.91845e-23	-3.51413	1.04823e-19	1.49738e-19	-1.27495	0.00666027	0.0122024	-1.45188	0.00110722	0.00164674	-1.88901	6.35746e-06	9.58767e-06	-2.46849	1.9151e-05	3.03457e-05	chrIV	130871	131833	963	-	NA	NA	TFIID-dominated	NA	NA	CR
YDL184C	-2.8729	9.36352e-32	4.06226e-31	-2.76074	1.48416e-28	2.57587e-28	-1.71478	0.0325804	0.0376364	-2.83045	2.09488e-25	3.22558e-25	0.0548395	0.858188	0.879857	0.129306	0.673326	0.719644	-0.305545	0.524005	0.583841	-0.284128	0.123645	0.151724	chrIV	130407	130484	78	-	TATA-less	1_mis	TFIID-dominated	TAF1-enriched	RPG	TFIID
YDL185W	-1.76631	3.82888e-43	3.21054e-42	-2.16844	6.68946e-64	3.57345e-63	-2.03302	1.0774e-24	1.74375e-24	-3.22669	9.01293e-39	2.06373e-38	0.0357703	0.725822	0.764873	-0.0619748	0.542293	0.599179	-0.126442	0.400604	0.457372	-0.184502	0.334189	0.386314	chrIV	126787	130002	3216	+	TATA-less	1_mis	TFIID-dominated	TAF1-enriched	NA	TFIID
YDL188C	-1.58957	6.21176e-26	1.94284e-25	-2.49009	4.20972e-59	1.8823e-58	-2.31576	2.56577e-29	5.25294e-29	-3.55448	3.56684e-37	7.63774e-37	-0.414521	0.00678315	0.0123935	-1.00381	3.18525e-11	1.01981e-10	-1.35339	1.96597e-13	4.12962e-13	-1.92927	4.91277e-16	1.44786e-15	chrIV	123865	124998	1134	-	TATA-less	1_mis	TFIID-dominated	TAF1-enriched	NA	TFIID
YDL189W	-1.41988	1.90696e-20	4.3556e-20	-2.42628	4.68125e-53	1.66366e-52	-2.21609	2.54243e-25	4.23023e-25	-3.79841	9.88571e-39	2.25667e-38	-0.611549	0.000793903	0.00192179	-1.22719	6.02769e-12	2.11179e-11	-1.77298	3.31868e-17	8.69769e-17	-2.27141	3.18166e-14	8.31362e-14	chrIV	122216	123589	1374	+	TATA-less	1_mis	TFIID-dominated	TAF1-enriched	NA	TFIID
YDL190C	-1.4912	4.5452e-27	1.50971e-26	-2.67829	3.73334e-82	4.25365e-81	-2.11173	3.27877e-26	5.68381e-26	-3.4855	2.82127e-38	6.30158e-38	0.0840456	0.571176	0.624224	-0.600011	3.60617e-05	6.00813e-05	-0.822235	1.5913e-07	2.56102e-07	-0.97606	2.86357e-07	4.94342e-07	chrIV	118707	121592	2886	-	TATA-less	1_mis	TFIID-dominated	TAF1-enriched	NA	TFIID
YDL191W	-2.68926	2.69293e-48	2.94121e-47	-2.59109	2.7682e-44	7.24975e-44	-2.75371	4.26829e-43	3.36397e-42	-3.04101	9.88146e-34	1.84314e-33	0.00229287	0.98646	0.9889	0.0288668	0.830396	0.859978	0.278518	0.10528	0.128577	-0.0218369	0.896856	0.911531	chrIV	117664	118517	854	+	TATA-less	1_mis	TFIID-dominated	TAF1-enriched	RPG	TFIID
YDL192W	-2.4842	2.43373e-47	2.55635e-46	-2.74511	1.4602e-56	5.86044e-56	-2.6084	2.46346e-40	1.40497e-39	-3.63291	7.02576e-52	4.87751e-51	-0.365145	0.00279861	0.00572188	-0.625569	2.54808e-07	5.2264e-07	-0.471776	0.00157813	0.0021461	-0.352437	0.06283	0.0796612	chrIV	116321	116866	546	+	TATA-less	1_mis	TFIID-dominated	TAF1-enriched	NA	TFIID
YDL193W	-1.97653	4.72056e-31	1.97429e-30	-2.68487	2.75132e-52	9.43092e-52	-2.58377	7.34293e-32	1.7961e-31	-3.97759	8.702e-44	2.74755e-43	-0.725303	0.00050767	0.00130231	-1.42492	2.20026e-12	8.14482e-12	-1.78003	1.63396e-14	3.64233e-14	-2.21719	9.01437e-11	1.89834e-10	chrIV	114672	115799	1128	+	TATA-less	1_mis	TFIID-dominated	TAF1-depleted	NA	TFIID
YDL194W	-1.78644	2.29774e-15	4.06714e-15	-3.70648	1.18383e-49	3.71961e-49	-2.82776	4.71596e-28	8.97813e-28	-4.4945	1.14837e-39	2.77462e-39	-1.12897	0.000792874	0.00192008	-2.03287	1.23929e-09	3.24638e-09	-2.48704	1.39709e-21	5.15643e-21	-3.83699	8.84311e-22	4.32021e-21	chrIV	111580	114234	2655	+	TATA-less	2_mis	TFIID-dominated	TAF1-enriched	NA	TFIID
YDL195W	-1.76645	1.27805e-32	5.78623e-32	-2.38103	1.14136e-57	4.82947e-57	-2.74	1.27883e-43	1.07482e-42	-3.47684	1.49355e-47	6.49549e-47	0.116974	0.297065	0.354274	-0.105349	0.344482	0.3995	-0.875451	3.98094e-07	6.29037e-07	-0.604925	0.00252752	0.00354506	chrIV	107208	111029	3822	+	TATA-less	3_mis	TFIID-dominated	TAF1-enriched	NA	TFIID
YDL197C	-2.31232	9.21704e-33	4.22027e-32	-3.05811	6.70729e-50	2.13185e-49	-3.19625	9.12729e-45	9.05573e-44	-4.73161	6.49961e-46	2.46561e-45	-1.25736	8.3255e-07	4.90316e-06	-1.80076	1.77914e-12	6.64611e-12	-2.23473	7.78807e-16	1.86148e-15	-3.27668	1.5536e-18	5.66382e-18	chrIV	104917	106494	1578	-	TATA-less	2_mis	TFIID-dominated	TAF1-enriched	NA	TFIID
YDL198C	-2.15298	1.15765e-31	5.00019e-31	-3.53332	1.94808e-79	1.9621e-78	-2.62241	2.66607e-40	1.5128e-39	-4.30974	2.75344e-52	2.01094e-51	-1.11591	6.50327e-08	5.16567e-07	-1.64395	1.35194e-17	1.04527e-16	-1.98167	3.80804e-26	2.12264e-25	-2.68314	5.87818e-23	3.14242e-22	chrIV	103649	104551	903	-	TATA-less	2_mis	SAGA-dominated	TAF1-depleted	NA	CR
YDL200C	-2.95302	2.33392e-24	6.61502e-24	-4.37069	6.70854e-40	1.53533e-39	-3.11035	2.68426e-34	8.05518e-34	-4.57582	2.05271e-19	2.92049e-19	-1.14516	0.00323787	0.00654211	-1.91805	2.25711e-07	4.65146e-07	-1.98993	6.89192e-17	1.76509e-16	-2.39479	2.89675e-12	6.63596e-12	chrIV	100501	101067	567	-	NA	NA	TFIID-dominated	NA	NA	TFIID
YDL201W	-1.92872	1.21745e-25	3.75135e-25	-1.94878	4.31182e-25	6.97683e-25	-2.39232	1.864e-30	4.09359e-30	-3.48933	7.15555e-29	1.1759e-28	-1.16659	1.19622e-10	1.8256e-09	-1.35368	2.65902e-14	1.27793e-13	-1.78443	2.67109e-20	8.88275e-20	-2.07357	2.73003e-12	6.26285e-12	chrIV	99561	100421	861	+	TATA-less	1_mis	TFIID-dominated	TAF1-enriched	NA	TFIID
YDL202W	-1.45829	2.29407e-17	4.48164e-17	-2.60689	2.72038e-48	8.13031e-48	-2.37323	8.22921e-31	1.8484e-30	-3.96221	1.1401e-43	3.55149e-43	-0.580479	0.0094752	0.0165961	-1.48919	1.70432e-11	5.63599e-11	-2.2766	2.69577e-28	1.933e-27	-2.9678	5.11249e-26	3.86818e-25	chrIV	98475	99224	750	+	TATA-less	2_mis	TFIID-dominated	TAF1-enriched	NA	TFIID
YDL203C	-1.44787	3.04968e-17	5.90896e-17	-2.05241	6.65169e-32	1.24282e-31	-2.40643	4.1549e-29	8.40632e-29	-3.87635	1.38681e-41	3.77412e-41	-0.498149	0.0207591	0.0333845	-1.19544	2.0241e-08	4.64711e-08	-1.98453	9.40524e-16	2.23409e-15	-2.43561	2.78791e-12	6.39112e-12	chrIV	96082	97953	1872	-	TATA-less	2_mis	TFIID-dominated	TAF1-enriched	NA	TFIID
YDL204W	-1.93318	2.82909e-19	6.06778e-19	-2.61064	2.99453e-31	5.52583e-31	-2.06667	4.17062e-22	6.2648e-22	-3.96198	8.16823e-33	1.48335e-32	-0.927002	0.00246829	0.00513913	-1.70272	2.87483e-08	6.49991e-08	-1.32496	2.95633e-06	4.52438e-06	-2.24561	8.89466e-10	1.76755e-09	chrIV	94605	95786	1182	+	TATA-less	2_mis	SAGA-dominated	TAF1-enriched	NA	CR
YDL205C	-1.4878	1.54455e-19	3.36533e-19	-2.28514	1.01394e-42	2.53448e-42	-2.10209	8.12106e-25	1.32043e-24	-3.5122	2.67187e-40	6.68563e-40	-0.773849	1.11736e-05	4.75697e-05	-1.52634	2.37982e-18	2.04821e-17	-1.73523	1.16391e-24	5.61952e-24	-2.74883	5.90299e-39	1.90591e-37	chrIV	92762	93745	984	-	TATA-containing	0_mis	TFIID-dominated	TAF1-enriched	NA	CR
YDL207W	-1.48696	6.53352e-17	1.24516e-16	-2.2082	6.14822e-34	1.20488e-33	-2.45928	3.64119e-31	8.40091e-31	-3.95641	3.31752e-46	1.29268e-45	-0.599919	0.00328177	0.0066219	-1.32308	5.12379e-11	1.60665e-10	-1.98937	7.17247e-24	3.17812e-23	-2.61532	8.38964e-28	7.64207e-27	chrIV	88248	89864	1617	+	TATA-less	1_mis	TFIID-dominated	TAF1-enriched	NA	TFIID
YDL208W	-2.13521	2.20412e-33	1.04407e-32	-2.05612	2.09179e-30	3.78664e-30	-2.49493	4.26585e-33	1.15367e-32	-3.83803	6.66066e-51	4.18059e-50	-1.02041	1.24229e-12	2.67739e-11	-1.30669	9.64929e-20	1.06077e-18	-1.67227	9.58484e-24	4.20271e-23	-2.2788	3.41565e-31	4.5463e-30	chrIV	87512	87982	471	+	TATA-less	2_mis	TFIID-dominated	TAF1-enriched	NA	TFIID
YDL209C	-1.20233	2.43643e-08	3.3706e-08	-2.0246	1.9062e-19	2.84045e-19	-2.25983	3.34762e-23	5.19252e-23	-4.10056	6.86307e-39	1.58547e-38	-0.61587	0.0335555	0.0511326	-1.31173	7.06036e-06	1.25222e-05	-1.95309	1.35938e-12	2.73893e-12	-3.31373	1.72765e-16	5.31247e-16	chrIV	86207	87226	1020	-	TATA-less	2_mis	TFIID-dominated	TAF1-enriched	NA	TFIID
YDL210W	-2.86822	4.42728e-06	5.86003e-06	-4.00394	1.47844e-08	1.93413e-08	-3.79839	4.55033e-18	6.27706e-18	-4.32824	5.07504e-07	6.50643e-07	-0.551926	0.354894	0.414364	-1.45229	0.0142755	0.0194332	-2.02542	0.000270555	0.000380469	-2.12302	0.0128556	0.017291	chrIV	84270	85985	1716	+	NA	NA	SAGA-dominated	NA	NA	NA
YDL212W	-1.97788	9.89557e-30	3.86085e-29	-2.57548	9.11538e-48	2.67533e-47	-2.36521	2.12597e-34	6.44905e-34	-4.16398	1.433e-53	1.19111e-52	-0.630284	8.00762e-05	0.000264569	-0.886743	1.95491e-08	4.49931e-08	-0.678451	1.06645e-05	1.58992e-05	-0.99366	5.85843e-07	9.99704e-07	chrIV	78426	79058	633	+	TATA-containing	0_mis	TFIID-dominated	TAF1-enriched	NA	TFIID
YDL213C	-1.86803	4.90156e-19	1.0399e-18	-2.4568	1.39933e-28	2.43049e-28	-2.59602	4.3615e-31	1.00077e-30	-3.13116	1.96546e-22	2.90043e-22	-1.1279	6.89951e-08	5.43732e-07	-1.27999	3.96162e-10	1.10127e-09	-1.60054	4.11167e-18	1.15318e-17	-1.64573	6.13582e-11	1.30948e-10	chrIV	77289	77966	678	-	TATA-less	2_mis	TFIID-dominated	TAF1-enriched	NA	TFIID
YDL214C	-0.356015	0.210781	0.245125	-0.385293	0.202121	0.226084	0.657108	0.0304818	0.0352607	-0.708355	0.155083	0.176914	0.917183	0.014602	0.0243759	0.943029	0.0132057	0.0180368	1.33324	0.00673161	0.00886934	1.06182	0.0698468	0.0882318	chrIV	74446	76545	2100	-	NA	NA	TFIID-dominated	NA	NA	NA
YDL215C	-1.27189	1.93476e-17	3.797e-17	-2.28711	1.97331e-51	6.59277e-51	-2.02139	2.34069e-25	3.89941e-25	-3.25417	3.46898e-39	8.1337e-39	0.374169	0.0180209	0.0293977	-0.428468	0.00652931	0.00914719	-0.606227	0.000110128	0.000157795	-0.972623	9.22587e-06	1.48534e-05	chrIV	70640	73918	3279	-	TATA-less	1_mis	nocall	TAF1-enriched	NA	TFIID
YDL216C	-1.79777	1.64054e-13	2.67343e-13	-3.83372	8.51619e-45	2.26405e-44	-2.81274	4.29666e-37	1.6892e-36	-4.11233	6.10101e-30	1.02663e-29	-1.21371	0.00172135	0.00375697	-2.19129	1.00534e-08	2.39734e-08	-2.69732	4.77657e-22	1.82388e-21	-3.28129	3.6417e-16	1.08651e-15	chrIV	68997	70319	1323	-	NA	NA	TFIID-dominated	NA	NA	TFIID
YDL217C	-1.50577	1.84884e-16	3.44037e-16	-2.61971	7.26079e-44	1.87789e-43	-2.1957	1.73358e-27	3.20395e-27	-3.06348	3.25165e-28	5.26402e-28	-0.901496	0.000625127	0.0015507	-1.44526	2.03234e-08	4.66295e-08	-2.49586	2.46014e-32	2.76946e-31	-3.13977	1.24311e-25	9.07899e-25	chrIV	67983	68606	624	-	TATA-less	2_mis	TFIID-dominated	TAF1-enriched	NA	TFIID
YDL219W	-2.39411	5.04588e-20	1.12552e-19	-3.49102	1.3378e-34	2.6651e-34	-2.92113	7.15524e-36	2.47883e-35	-4.49034	1.87122e-25	2.8845e-25	-0.98653	1.88762e-05	7.43792e-05	-1.27078	1.46369e-08	3.42909e-08	-1.11759	7.76168e-10	1.37737e-09	-1.40453	1.29137e-08	2.39338e-08	chrIV	65242	65765	524	+	TATA-less	1_mis	TFIID-dominated	TAF1-enriched	NA	TFIID
YDL220C	-1.90195	1.27509e-21	3.08932e-21	-2.32338	6.4301e-30	1.14884e-29	-2.44735	5.33463e-31	1.21409e-30	-2.76285	1.15688e-22	1.71433e-22	-0.954288	0.000172905	0.000511149	-0.674733	0.00510896	0.00722388	-2.02671	1.01611e-13	2.17576e-13	-2.0623	2.44098e-07	4.22843e-07	chrIV	62244	65018	2775	-	NA	NA	TFIID-dominated	NA	NA	TFIID
YDL222C	-1.76233	2.5768e-07	3.49018e-07	-1.58739	1.61759e-05	2.04894e-05	-0.896864	0.00621244	0.00731511	-1.23194	0.0155145	0.018571	-0.803312	0.0692448	0.0973051	-0.431949	0.327511	0.381931	-1.44481	0.0204326	0.0262267	-1.33107	0.0786395	0.0985563	chrIV	60872	61801	930	-	NA	NA	SAGA-dominated	NA	NA	NA
YDL223C	-1.69243	8.81792e-16	1.59163e-15	-2.67127	1.1097e-34	2.21649e-34	-2.23742	4.12792e-25	6.79743e-25	-2.46643	6.35452e-13	8.53814e-13	-0.387471	0.0900188	0.122684	-0.356034	0.125651	0.15646	-1.13579	0.000617641	0.000855293	-1.19013	0.0723956	0.0912923	chrIV	57265	60405	3141	-	NA	NA	SAGA-dominated	NA	NA	NA
YDL224C	-1.05798	1.57298e-11	2.37749e-11	-1.60189	2.44482e-24	3.90613e-24	-2.02345	1.91956e-24	3.07855e-24	-2.91603	6.10872e-26	9.48603e-26	-0.309121	0.0555898	0.0799095	-0.822624	1.83293e-07	3.81335e-07	-2.00715	5.22232e-13	1.07311e-12	-2.24285	1.62542e-07	2.84437e-07	chrIV	54397	56346	1950	-	TATA-less	1_mis	TFIID-dominated	TAF1-enriched	NA	TFIID
YDL225W	-1.42096	1.8029e-22	4.60218e-22	-2.60832	1.85388e-69	1.2565e-68	-2.40617	1.80697e-30	3.96966e-30	-3.89916	1.9482e-49	1.03003e-48	-0.454577	0.00433373	0.00840333	-1.10685	1.51944e-12	5.70858e-12	-1.6522	3.4366e-24	1.57081e-23	-2.14466	6.69284e-20	2.72987e-19	chrIV	52445	54100	1656	+	TATA-less	1_mis	TFIID-dominated	TAF1-enriched	NA	TFIID
YDL226C	-1.81534	3.05276e-34	1.53062e-33	-2.45916	2.57686e-59	1.16052e-58	-2.38492	2.10525e-28	4.08563e-28	-3.64801	8.8489e-45	3.02641e-44	-0.883045	8.37865e-08	6.45908e-07	-1.68261	4.38414e-25	1.05429e-23	-1.92188	6.93689e-27	4.1788e-26	-2.41725	1.33062e-26	1.06875e-25	chrIV	51115	52173	1059	-	TATA-less	1_mis	TFIID-dominated	TAF1-enriched	NA	TFIID
YDL227C	-2.50985	7.36898e-57	1.19207e-55	-2.52543	4.25492e-54	1.56067e-53	-2.45119	3.552e-33	9.67639e-33	-3.63079	3.05851e-43	9.29968e-43	-1.21835	8.73796e-10	1.12158e-08	-0.898641	7.1987e-06	1.27503e-05	-1.41978	6.52872e-16	1.56795e-15	-1.97229	1.56177e-14	4.1711e-14	chrIV	46271	48031	1761	-	TATA-less	1_mis	NA	TAF1-enriched	NA	CR
YDL229W	-2.77738	5.00301e-65	1.13628e-63	-2.14993	1.38192e-39	3.13342e-39	-2.67416	1.15415e-42	8.65873e-42	-3.87745	1.0338e-49	5.61551e-49	-0.072964	0.512808	0.569358	0.107874	0.332622	0.387201	-0.100771	0.491113	0.549919	-0.0333233	0.849576	0.86699	chrIV	44065	45906	1842	+	TATA-containing	0_mis	nocall	TAF1-depleted	NA	TFIID
YDL230W	-2.07995	5.95963e-25	1.74316e-24	-3.16791	1.02531e-49	3.2319e-49	-2.98051	2.3822e-45	2.5043e-44	-4.70531	2.06536e-46	8.20908e-46	-0.813027	0.00749038	0.013538	-1.74038	7.67139e-09	1.8564e-08	-2.71043	1.7231e-34	2.50695e-33	-3.60933	6.74398e-33	1.09944e-31	chrIV	42700	43707	1008	+	TATA-less	1_mis	TFIID-dominated	TAF1-enriched	NA	TFIID
YDL231C	-2.04081	4.16976e-46	4.06834e-45	-2.65179	8.6169e-75	7.15537e-74	-2.75339	1.97176e-42	1.41743e-41	-4.01206	2.4278e-49	1.26769e-48	-1.49418	2.1487e-17	1.07668e-15	-1.80905	2.47348e-26	6.63076e-25	-2.23583	5.94551e-44	2.95823e-42	-2.1834	4.01504e-24	2.43365e-23	chrIV	38867	42244	3378	-	TATA-less	1_mis	TFIID-dominated	TAF1-enriched	NA	TFIID
YDL232W	-2.32318	4.12952e-24	1.15468e-23	-2.58809	4.25046e-28	7.27938e-28	-1.79047	0.0131889	0.0153947	-3.81715	4.82646e-23	7.18691e-23	-0.819944	4.69525e-05	0.000165296	-1.08159	4.44373e-08	9.83635e-08	-0.50985	0.597086	0.656734	-1.94794	6.64142e-05	0.000101823	chrIV	38487	38597	111	+	TATA-less	1_mis	TFIID-dominated	TAF1-enriched	NA	TFIID
YDL234C	-1.52995	4.04375e-18	8.18172e-18	-2.84229	2.47167e-56	9.81086e-56	-2.66112	2.73642e-40	1.54882e-39	-4.43729	3.20021e-48	1.49085e-47	-0.900563	4.48504e-05	0.000158963	-1.87604	3.82019e-18	3.20768e-17	-1.96098	4.07001e-22	1.56233e-21	-3.05329	3.13939e-33	5.30442e-32	chrIV	34237	36477	2241	-	NA	NA	SAGA-dominated	NA	NA	TFIID
YDL235C	-1.71908	3.52222e-17	6.79958e-17	-3.3711	1.956e-57	8.17563e-57	-2.56363	1.19652e-38	5.59239e-38	-4.08765	1.67107e-47	7.23951e-47	-0.65188	0.00137631	0.00308567	-1.45641	3.52176e-13	1.44425e-12	-1.99419	7.26065e-24	3.21282e-23	-2.53751	1.79626e-20	7.68208e-20	chrIV	33415	33918	504	-	TATA-less	1_mis	TFIID-dominated	TAF1-depleted	NA	TFIID
YDL236W	-1.96032	8.72168e-26	2.71056e-25	-3.04661	1.36228e-56	5.47707e-56	-2.76408	9.58756e-45	9.48433e-44	-4.35005	3.89139e-57	4.9308e-56	-0.767174	3.99808e-06	1.93407e-05	-1.45984	1.08358e-18	9.9407e-18	-1.575	5.32186e-22	2.02735e-21	-1.98107	1.6539e-21	7.86779e-21	chrIV	32296	33234	939	+	TATA-less	1_mis	TFIID-dominated	TAF1-enriched	NA	TFIID
YDL237W	-2.57596	5.83026e-41	4.29075e-40	-3.4846	1.45809e-67	9.1837e-67	-2.89258	1.21157e-41	8.07755e-41	-4.7191	5.1877e-52	3.65798e-51	-0.544708	0.00210074	0.00446195	-0.898232	2.68362e-07	5.48891e-07	-0.861747	9.96373e-06	1.48919e-05	-1.02184	3.43003e-06	5.62783e-06	chrIV	30657	31829	1173	+	NA	NA	TFIID-dominated	NA	NA	TFIID
YDL238C	-2.03626	1.91851e-22	4.88277e-22	-3.22569	6.43889e-49	1.95938e-48	-2.1888	2.24565e-26	3.92535e-26	-4.07134	8.83387e-42	2.43455e-41	-1.42418	9.03842e-07	5.24595e-06	-2.2224	2.05863e-14	1.00339e-13	-2.00328	3.8331e-16	9.37492e-16	-3.14765	2.1587e-20	9.15414e-20	chrIV	28985	30454	1470	-	NA	NA	SAGA-dominated	NA	NA	TFIID
YDL239C	-1.74871	7.12082e-19	1.49959e-18	-3.20196	9.09302e-53	3.19023e-52	-1.81717	8.4086e-18	1.1559e-17	-3.7438	1.89369e-31	3.30195e-31	-1.45154	1.52343e-05	6.18528e-05	-1.35345	1.92894e-05	3.28572e-05	-1.44069	1.17627e-10	2.15848e-10	-1.87198	2.02583e-09	3.9405e-09	chrIV	26403	28775	2373	-	NA	NA	TFIID-dominated	NA	NA	TFIID
YDL240W	-1.75706	2.94666e-37	1.74535e-36	-2.69116	2.93524e-82	3.35547e-81	-2.6386	8.66067e-35	2.70148e-34	-4.27351	3.4204e-57	4.40017e-56	-1.34668	2.7195e-14	7.89968e-13	-1.49143	2.37211e-18	2.04426e-17	-2.51147	3.94276e-43	1.73641e-41	-3.31806	1.65885e-38	5.1275e-37	chrIV	22823	25876	3054	+	TATA-less	1_mis	TFIID-dominated	TAF1-enriched	NA	TFIID
YDL243C	-1.77465	2.47228e-17	4.81606e-17	-6.58036	1.87495e-218	2.14338e-215	-3.10603	4.17219e-60	3.54213e-58	-4.65442	8.87539e-78	1.35975e-75	-0.594377	0.236115	0.289628	-3.15872	1.75437e-10	5.10696e-10	-2.61647	5.28799e-57	1.0771e-54	-3.77836	1.19153e-75	4.85697e-73	chrIV	17577	18566	990	-	NA	NA	TFIID-dominated	NA	NA	CR
YDL248W	-2.46334	5.47425e-22	1.35552e-21	-3.07435	1.52282e-30	2.76544e-30	-2.45251	1.34245e-18	1.86607e-18	-4.63574	1.37206e-24	2.08453e-24	-1.23238	0.0016756	0.00367984	-1.4128	0.000203395	0.000318812	-1.48556	0.00878332	0.0115029	-2.78574	1.13044e-06	1.90166e-06	chrIV	1802	2953	1152	+	NA	NA	TFIID-dominated	NA	NA	TFIID
YDR001C	-2.16462	1.63606e-41	1.24686e-40	-3.682	3.90928e-113	1.86206e-111	-2.75669	2.40153e-51	5.55416e-50	-4.60982	8.29589e-66	2.9433e-64	-0.289388	0.0222997	0.035586	-1.09471	1.01107e-18	9.31419e-18	-1.49758	8.13835e-23	3.2805e-22	-1.92576	4.52716e-25	3.08206e-24	chrIV	450220	452475	2256	-	TATA-containing	0_mis	SAGA-dominated	TAF1-depleted	NA	CR
YDR002W	-2.06432	4.13978e-42	3.26752e-41	-2.72532	4.78088e-70	3.30899e-69	-2.41752	1.55352e-35	5.19672e-35	-2.72697	2.88101e-28	4.66829e-28	-0.130939	0.279411	0.336208	-0.344476	0.0040338	0.00574713	-0.280108	0.0835407	0.102914	-0.26191	0.155996	0.188863	chrIV	453045	453650	606	+	TATA-less	1_mis	TFIID-dominated	TAF1-enriched	NA	TFIID
YDR003W	-2.4523	1.6089e-35	8.57456e-35	-3.83375	2.37561e-78	2.29497e-77	-3.28825	3.05468e-49	5.53723e-48	-4.95873	5.03137e-63	1.33006e-61	-1.27334	9.52048e-06	4.12143e-05	-2.69467	1.49273e-22	2.55533e-21	-3.08906	5.77671e-44	2.89635e-42	-4.41459	2.40857e-37	6.60029e-36	chrIV	454122	454754	633	+	TATA-less	1_mis	TFIID-dominated	TAF1-depleted	NA	TFIID
YDR004W	-1.59082	4.94173e-16	9.01951e-16	-3.52217	3.57385e-63	1.84586e-62	-2.73435	1.7725e-42	1.28659e-41	-4.39185	7.7314e-54	6.67316e-53	-0.882863	0.000989598	0.00231938	-1.78152	4.18905e-11	1.32306e-10	-2.15999	6.6916e-31	6.49046e-30	-2.88334	1.55557e-28	1.53393e-27	chrIV	455201	456583	1383	+	TATA-less	1_mis	TFIID-dominated	TAF1-enriched	NA	TFIID
YDR005C	-1.63201	3.59329e-21	8.4976e-21	-2.26177	4.00591e-38	8.73658e-38	-2.2666	6.06097e-28	1.14768e-27	-3.93316	1.12263e-42	3.28031e-42	-0.731718	0.00112458	0.00258821	-1.30128	3.4534e-09	8.65135e-09	-2.01107	3.90813e-22	1.50551e-21	-3.13123	1.2371e-27	1.10223e-26	chrIV	456836	458103	1268	-	TATA-less	2_mis	TFIID-dominated	TAF1-depleted	NA	TFIID
YDR006C	-1.4203	1.71714e-20	3.93645e-20	-1.83681	8.38889e-33	1.60143e-32	-2.66768	7.04393e-37	2.71203e-36	-3.61427	2.39105e-43	7.31642e-43	-0.56537	0.000285125	0.000786088	-0.976911	3.3058e-10	9.2983e-10	-2.10535	3.4127e-21	1.21808e-20	-2.53258	1.14535e-17	3.88657e-17	chrIV	458542	461247	2706	-	TATA-less	1_mis	TFIID-dominated	TAF1-enriched	NA	TFIID
YDR007W	-3.65799	0.000101249	0.000130883	-2.94752	0.00409998	0.00499232	-3.38323	0.000573096	0.000685773	-4.09895	0.0129617	0.0155405	-0.888785	0.129163	0.169725	-0.507329	0.386596	0.443636	-1.90448	0.0417046	0.0526192	-0.903222	0.478466	0.534159	chrIV	461842	462516	675	+	TATA-containing	0_mis	TFIID-dominated	TAF1-depleted	NA	NA
YDR009W	-2.00189	6.27247e-05	8.14364e-05	-4.0281	9.28419e-12	1.25652e-11	-3.23144	2.99631e-19	4.21925e-19	-5.66007	2.28099e-08	2.95581e-08	-1.36406	0.0150931	0.0250842	-1.88349	0.000756926	0.0011387	-2.50555	1.90236e-06	2.93342e-06	-2.14821	0.0275276	0.0360223	chrIV	463434	464996	1563	+	NA	NA	nocall	NA	NA	NA
YDR011W	-3.32095	7.22326e-98	6.60591e-96	-4.06397	3.2284e-146	4.7114e-144	-3.13181	2.52257e-53	7.29263e-52	-4.34401	6.6372e-58	9.39945e-57	-1.693	2.24445e-08	2.04174e-07	-2.27689	4.08459e-14	1.90974e-13	-2.79763	6.54953e-76	3.04927e-73	-3.60164	2.06593e-74	7.09157e-72	chrIV	465919	470424	4506	+	TATA-less	1_mis	SAGA-dominated	TAF1-depleted	NA	CR
YDR012W	-2.10658	8.28746e-25	2.40049e-24	-2.08019	4.96492e-24	7.89575e-24	-2.52578	9.93757e-37	3.772e-36	-3.74087	8.32973e-39	1.91184e-38	-0.646633	5.35883e-07	3.32192e-06	-1.50303	1.23927e-32	6.64429e-31	-1.29202	1.22888e-10	2.2544e-10	-1.90467	2.42196e-18	8.69824e-18	chrIV	471853	472941	1089	+	TATA-less	2_mis	TFIID-dominated	TAF1-depleted	RPG	TFIID
YDR013W	-1.62622	1.83583e-12	2.87619e-12	-1.95176	1.98216e-16	2.82537e-16	-2.21611	6.89462e-20	9.80747e-20	-4.28374	2.0732e-31	3.60936e-31	-0.306635	0.296309	0.353584	-1.14266	0.000128274	0.000204344	-1.7641	3.60952e-09	6.23393e-09	-2.97317	1.25174e-12	2.94512e-12	chrIV	473157	473783	627	+	TATA-less	1_mis	TFIID-dominated	TAF1-enriched	NA	TFIID
YDR014W	-1.87388	6.28981e-17	1.20005e-16	-3.12699	2.7027e-39	6.09194e-39	-3.02903	5.53406e-44	4.95554e-43	-4.63676	6.12264e-50	3.43367e-49	-0.975117	0.00259619	0.00536193	-2.14155	2.20687e-10	6.33675e-10	-2.82211	3.0231e-31	3.05497e-30	-3.24743	1.18362e-19	4.72435e-19	chrIV	474046	475989	1944	+	NA	NA	TFIID-dominated	NA	NA	TFIID
YDR014W-A	-0.309945	0.740258	0.780063	-2.88106	0.0031211	0.00381258	-1.96926	0.048468	0.0557017	-1.33307	0.264964	0.296452	-0.16875	0.775442	0.80489	-0.480769	0.414524	0.472205	-0.742851	0.423622	0.481123	-0.83281	0.480562	0.536407	chrIV	477797	478285	489	+	NA	NA	NA	NA	NA	NA
YDR016C	-2.36902	1.31467e-20	3.03613e-20	-3.55564	8.82649e-38	1.9062e-37	-2.57746	5.4998e-17	7.48521e-17	-5.09588	2.64555e-34	5.0406e-34	-1.02137	0.000363414	0.000971636	-1.9283	9.023e-12	3.08356e-11	-2.45915	1.134e-11	2.18164e-11	-2.81343	3.4674e-21	1.59032e-20	chrIV	478474	478758	285	-	TATA-less	2_mis	TFIID-dominated	TAF1-enriched	NA	TFIID
YDR017C	-1.92326	2.32273e-36	1.31124e-35	-2.70766	4.15061e-68	2.66564e-67	-2.77167	7.02353e-36	2.43572e-35	-4.42771	1.68857e-50	1.0091e-49	-1.0657	6.10087e-10	8.09814e-09	-1.56733	8.85696e-20	9.83589e-19	-2.33371	2.5247e-35	4.15556e-34	-2.41426	1.60106e-21	7.63869e-21	chrIV	479115	482267	3153	-	NA	NA	TFIID-dominated	NA	NA	TFIID
YDR019C	-3.53172	7.50055e-94	5.98213e-92	-2.52591	8.57438e-50	2.71272e-49	-2.87642	1.60255e-41	1.05272e-40	-4.66092	1.04301e-53	8.87743e-53	-2.21035	3.63916e-27	9.51402e-25	-1.52293	3.01207e-16	1.90173e-15	-1.89318	7.56025e-24	3.33634e-23	-2.64221	1.52874e-30	1.9064e-29	chrIV	484163	485365	1203	-	TATA-containing	0_mis	SAGA-dominated	TAF1-enriched	NA	CR
YDR021W	-1.48372	2.88015e-13	4.64822e-13	-1.38577	5.59e-11	7.49742e-11	-2.33488	3.76268e-22	5.65836e-22	-3.9486	3.78389e-30	6.40562e-30	-0.488713	0.0824751	0.113509	-0.692705	0.0177916	0.0240345	-1.91267	2.34856e-13	4.91899e-13	-2.03738	2.7893e-05	4.37304e-05	chrIV	486804	488003	1200	+	NA	NA	TFIID-dominated	NA	NA	TFIID
YDR022C	-1.57092	6.42028e-06	8.47674e-06	-2.08066	4.43829e-09	5.83743e-09	-1.09873	3.53478e-06	4.34606e-06	-0.604914	0.112384	0.12959	-0.477204	0.18812	0.236646	-0.281063	0.408324	0.465547	-0.199333	0.493323	0.552109	1.01607	0.00446024	0.00618272	chrIV	488072	488662	591	-	TATA-less	1_mis	TFIID-dominated	TAF1-enriched	NA	TFIID
YDR023W	-2.14599	3.86508e-57	6.29706e-56	-2.47969	1.69707e-74	1.39906e-73	-2.44479	3.4583e-31	7.99269e-31	-3.83415	1.08758e-52	8.24673e-52	-0.0562016	0.615899	0.664748	-0.385159	0.000543083	0.000824966	-0.314169	0.0351156	0.0444693	-0.258519	0.178853	0.21494	chrIV	489508	490896	1389	+	TATA-containing	0_mis	TFIID-dominated	TAF1-enriched	NA	TFIID
YDR025W	-3.1344	7.43554e-69	1.95404e-67	-2.82523	2.81099e-55	1.06936e-54	-3.32111	9.24266e-58	5.29833e-56	-4.30367	2.66173e-48	1.25298e-47	-0.246902	0.046571	0.0683671	-0.295573	0.0167001	0.0226207	-0.250698	0.147039	0.177055	-0.608297	0.000403535	0.000594232	chrIV	491515	492324	810	+	TATA-less	2_mis	TFIID-dominated	TAF1-enriched	RPG	TFIID
YDR026C	-1.2519	2.81824e-12	4.38627e-12	-2.24576	9.25085e-34	1.80877e-33	-2.1162	3.24171e-21	4.76174e-21	-3.80834	3.77617e-41	1.0006e-40	-0.588051	0.00745832	0.0134878	-1.4015	3.02122e-10	8.53272e-10	-1.8452	1.10452e-18	3.24146e-18	-2.47171	1.85596e-22	9.53117e-22	chrIV	492556	494268	1713	-	NA	NA	TFIID-dominated	NA	NA	TFIID
YDR027C	-1.34222	6.70673e-21	1.56788e-20	-2.78566	4.47175e-81	4.83019e-80	-2.2967	4.80319e-29	9.68581e-29	-3.57253	1.96338e-39	4.68004e-39	-0.439842	0.0109089	0.0188546	-1.31441	6.97416e-15	3.61188e-14	-1.77436	2.82511e-29	2.26217e-28	-1.84076	9.51158e-15	2.56447e-14	chrIV	494649	497318	2670	-	TATA-less	1_mis	TFIID-dominated	TAF1-enriched	NA	TFIID
YDR028C	-1.53744	9.40716e-29	3.46529e-28	-2.44414	2.5359e-69	1.71198e-68	-2.22292	9.72937e-26	1.65119e-25	-3.83849	1.01823e-49	5.53987e-49	-0.159322	0.217842	0.269301	-0.906303	1.18188e-12	4.5103e-12	-1.01182	2.52161e-11	4.77925e-11	-1.19033	2.06849e-09	4.01988e-09	chrIV	497835	500879	3045	-	TATA-less	2_mis	TFIID-dominated	TAF1-enriched	NA	TFIID
YDR030C	-1.55507	1.51087e-08	2.10374e-08	-2.44696	1.31108e-15	1.84692e-15	-2.48544	2.37045e-23	3.69134e-23	-3.66773	3.60668e-20	5.18835e-20	-0.236687	0.536708	0.592043	-0.686505	0.0864432	0.109749	-1.91438	4.59369e-11	8.59159e-11	-2.45546	3.02861e-07	5.22417e-07	chrIV	501753	503273	1521	-	NA	NA	TFIID-dominated	NA	NA	TFIID
YDR031W	-2.1949	8.7424e-17	1.65601e-16	-3.39876	4.96512e-31	9.11069e-31	-2.4682	2.42017e-21	3.56828e-21	-4.55914	1.97756e-29	3.28749e-29	-0.947371	0.00141296	0.00315607	-1.93504	2.33381e-10	6.68071e-10	-2.54451	1.83897e-18	5.3202e-18	-3.77561	4.45491e-28	4.20476e-27	chrIV	503498	503863	366	+	NA	NA	TFIID-dominated	NA	NA	TFIID
YDR032C	-2.21008	1.01577e-29	3.95863e-29	-4.46134	2.01136e-107	7.8386e-106	-2.896	7.01508e-51	1.56912e-49	-4.25212	1.33757e-50	8.07209e-50	-0.237832	0.0711296	0.0996743	-0.710852	4.63884e-08	1.02544e-07	-0.850782	1.64468e-07	2.64431e-07	-0.662786	0.00029562	0.000438988	chrIV	504099	504695	597	-	TATA-containing	0_mis	TFIID-dominated	TAF1-depleted	NA	CR
YDR033W	-4.71048	4.80263e-220	1.64706e-216	-4.59004	6.14304e-204	3.83046e-201	-3.45894	1.44843e-57	7.7717e-56	-4.78501	8.44454e-67	3.40866e-65	-1.39053	1.32726e-25	2.41844e-23	-1.24046	1.0176e-20	1.31284e-19	-0.962475	7.79012e-08	1.2745e-07	-0.969789	1.07882e-07	1.90627e-07	chrIV	508147	509109	963	+	TATA-containing	0_mis	SAGA-dominated	TAF1-depleted	NA	CR
YDR034C	-1.63815	3.46149e-27	1.15478e-26	-2.32541	2.17889e-51	7.26897e-51	-2.3682	2.47249e-26	4.31176e-26	-3.88322	2.1566e-46	8.55155e-46	-0.772841	4.25264e-05	0.000151847	-1.51573	1.22257e-15	6.99633e-15	-2.12865	3.35762e-22	1.29881e-21	-2.58864	5.32161e-16	1.56411e-15	chrIV	509737	512109	2373	-	TATA-less	2_mis	TFIID-dominated	TAF1-enriched	NA	TFIID
YDR035W	-2.20895	1.49725e-51	1.88433e-50	-2.9232	4.78398e-88	7.50877e-87	-2.62989	2.66972e-32	6.8083e-32	-4.13182	8.67108e-58	1.21269e-56	-0.684922	3.62715e-08	3.10243e-07	-0.917262	1.47668e-14	7.33964e-14	-1.30272	9.69005e-16	2.29923e-15	-1.16322	1.48124e-09	2.90372e-09	chrIV	521816	522928	1113	+	TATA-less	1_mis	TFIID-dominated	TAF1-depleted	NA	TFIID
YDR036C	-1.64761	1.3608e-23	3.70534e-23	-2.45552	1.39219e-48	4.19001e-48	-2.63989	1.54882e-35	5.1836e-35	-4.27799	7.03434e-38	1.54659e-37	-0.477121	0.00818812	0.0146098	-1.38614	1.12424e-14	5.67848e-14	-1.63706	9.78511e-18	2.66748e-17	-2.02102	1.60592e-15	4.56773e-15	chrIV	523211	524713	1503	-	TATA-less	2_mis	TFIID-dominated	TAF1-enriched	NA	TFIID
YDR037W	-2.5023	2.87427e-67	7.14297e-66	-2.31151	1.55285e-57	6.55043e-57	-2.62896	1.64391e-39	8.41659e-39	-4.09157	1.14884e-54	1.1159e-53	-0.224304	0.0461407	0.0679011	-0.308063	0.0058413	0.00821146	-0.438899	0.00434411	0.00577385	-0.430569	0.0178376	0.0237083	chrIV	525440	527215	1776	+	TATA-containing	0_mis	TFIID-dominated	TAF1-enriched	NA	CR
YDR038C	-2.75099	7.59875e-15	1.31317e-14	-3.03554	1.83574e-15	2.58178e-15	-3.19656	1.16708e-34	3.60387e-34	-4.05132	1.74356e-15	2.39278e-15	-1.66595	0.000780141	0.00189612	-1.49322	0.00218789	0.0031781	-2.33336	3.49048e-16	8.56586e-16	-2.70082	1.15194e-07	2.03272e-07	chrIV	527422	530697	3276	-	NA	NA	TFIID-dominated	NA	NA	NA
YDR040C	-2.10902	5.61256e-09	7.89673e-09	-2.44854	2.10046e-10	2.80184e-10	-2.06864	1.71048e-18	2.37273e-18	-4.01207	3.9542e-17	5.50047e-17	-0.528137	0.285801	0.342814	-0.976131	0.0421351	0.0551763	-1.3627	3.76115e-05	5.50161e-05	-2.50608	9.5224e-06	1.53195e-05	chrIV	535192	538467	3276	-	NA	NA	TFIID-dominated	NA	NA	NA
YDR041W	-1.89866	6.03866e-28	2.10677e-27	-2.65465	1.95581e-50	6.32482e-50	-2.49163	1.50342e-28	2.94064e-28	-3.95997	3.18373e-43	9.67171e-43	-1.07774	8.33702e-07	4.90514e-06	-2.01705	5.34447e-21	7.14891e-20	-2.37446	3.36345e-33	4.13641e-32	-3.36012	1.18869e-35	2.69188e-34	chrIV	539803	540414	612	+	TATA-less	2_mis	TFIID-dominated	TAF1-enriched	NA	TFIID
YDR043C	-1.1066	4.08074e-06	5.40866e-06	-1.51833	3.36655e-10	4.47157e-10	-1.00564	1.76693e-05	2.15469e-05	-3.30262	9.73395e-19	1.37273e-18	-0.121336	0.742594	0.777418	-0.922081	0.00976097	0.0134925	-0.588916	0.0963283	0.117998	-3.00585	1.16127e-07	2.04863e-07	chrIV	542674	543369	696	-	TATA-containing	0_mis	SAGA-dominated	TAF1-depleted	NA	CR
YDR044W	-1.29144	8.25909e-13	1.3092e-12	-1.66824	2.80267e-19	4.16184e-19	-1.94975	1.19375e-20	1.72964e-20	-4.02118	2.09547e-28	3.40951e-28	0.066473	0.7186	0.758593	-0.662546	0.000330719	0.000511765	-0.563618	0.00752663	0.00988894	-1.45207	2.80468e-08	5.10668e-08	chrIV	546642	547628	987	+	TATA-containing	0_mis	TFIID-dominated	TAF1-depleted	NA	TFIID
YDR045C	-1.45305	1.51279e-12	2.37552e-12	-2.27153	2.26344e-26	3.74275e-26	-1.93801	5.50122e-19	7.69804e-19	-3.60061	1.35833e-32	2.44892e-32	-0.345467	0.122101	0.161432	-0.63988	0.00421097	0.00598782	-1.25879	9.58109e-12	1.85036e-11	-1.82547	5.55098e-14	1.42086e-13	chrIV	547978	548310	333	-	TATA-less	1_mis	TFIID-dominated	TAF1-enriched	NA	TFIID
YDR046C	-2.35466	4.62892e-39	3.04408e-38	-3.75488	1.09212e-95	2.44001e-94	-2.64404	3.9453e-38	1.75239e-37	-4.32332	2.42666e-57	3.2012e-56	-1.51596	1.68136e-21	1.685e-19	-2.10215	1.78178e-43	3.06701e-41	-2.34981	2.26474e-46	1.58727e-44	-3.63073	1.93536e-62	3.6064e-60	chrIV	548762	550576	1815	-	TATA-less	1_mis	SAGA-dominated	TAF1-depleted	NA	CR
YDR047W	-2.67534	4.02029e-44	3.54437e-43	-3.93762	1.50025e-84	1.96004e-83	-3.20801	3.56476e-56	1.5972e-54	-4.9587	1.73988e-71	1.14986e-69	-1.10131	5.36338e-08	4.35811e-07	-1.78078	4.97745e-19	4.78083e-18	-1.82795	7.01044e-27	4.21921e-26	-1.87431	3.14207e-18	1.11737e-17	chrIV	551860	552948	1089	+	TATA-less	2_mis	TFIID-dominated	TAF1-enriched	NA	TFIID
YDR049W	-1.38438	1.68752e-19	3.66753e-19	-2.77159	1.72926e-67	1.08221e-66	-2.33084	1.29155e-24	2.08683e-24	-4.24298	5.16796e-46	1.98164e-45	-0.688802	0.00047413	0.00122609	-1.59476	1.32817e-15	7.55437e-15	-2.08539	3.8102e-26	2.12264e-25	-2.68842	6.48616e-24	3.8492e-23	chrIV	553254	555152	1899	+	TATA-less	1_mis	TFIID-dominated	TAF1-enriched	NA	TFIID
YDR050C	-3.68952	3.10992e-151	2.66637e-148	-3.36195	4.53479e-125	3.27412e-123	-3.12602	9.26874e-59	6.61334e-57	-4.55886	1.564e-65	5.32472e-64	-0.717151	1.97232e-10	2.90675e-09	-0.798232	1.26591e-12	4.81695e-12	-0.541572	0.000290784	0.000408476	-0.639392	0.000486388	0.000712859	chrIV	555726	556472	747	-	TATA-less	1_mis	SAGA-dominated	TAF1-depleted	NA	CR
YDR051C	-1.3645	1.81925e-10	2.66458e-10	-3.43056	1.14536e-52	4.00407e-52	-2.38458	8.02055e-30	1.69323e-29	-4.00113	1.87704e-48	8.95479e-48	-0.659774	0.00246566	0.00513544	-1.47524	7.50513e-12	2.59056e-11	-2.00172	1.03331e-30	9.73285e-30	-3.14648	7.46535e-40	2.6606e-38	chrIV	557056	558060	1005	-	TATA-less	2_mis	TFIID-dominated	TAF1-enriched	NA	TFIID
YDR052C	-1.52657	1.89247e-20	4.32393e-20	-2.26457	7.0819e-42	1.72312e-41	-2.53674	2.55169e-30	5.55836e-30	-4.09504	4.81224e-48	2.1963e-47	-0.851433	8.5254e-06	3.76936e-05	-1.48348	7.97744e-15	4.09901e-14	-2.2369	2.6841e-24	1.23814e-23	-2.98801	2.36919e-27	2.0412e-26	chrIV	558511	560625	2115	-	TATA-less	2_mis	TFIID-dominated	TAF1-enriched	NA	TFIID
YDR054C	-1.53451	8.27719e-19	1.73565e-18	-2.50032	1.47203e-46	4.12952e-46	-2.69327	3.45408e-37	1.37242e-36	-4.33489	5.1873e-58	7.51991e-57	-0.388377	0.0170636	0.0280491	-1.5475	1.46529e-21	2.15039e-20	-2.19356	5.96921e-36	1.06304e-34	-3.16038	3.40871e-38	1.0245e-36	chrIV	561440	562327	888	-	TATA-less	2_mis	TFIID-dominated	TAF1-enriched	NA	TFIID
YDR055W	-2.23989	1.36911e-48	1.50976e-47	-2.05179	1.83154e-40	4.27589e-40	-1.67244	6.80579e-17	9.24766e-17	-3.79298	3.81315e-39	8.92827e-39	-1.13689	1.24983e-09	1.51823e-08	-1.08508	3.66965e-09	9.16151e-09	-1.14548	3.57518e-07	5.65881e-07	-2.8976	2.07251e-20	8.8173e-20	chrIV	563527	564861	1335	+	TATA-containing	0_mis	SAGA-dominated	TAF1-depleted	NA	CR
YDR057W	-1.73264	5.61455e-22	1.38825e-21	-3.50761	5.37757e-72	4.01358e-71	-2.67076	5.39454e-32	1.33806e-31	-4.25193	2.1676e-42	6.21513e-42	-0.487157	0.0498434	0.0726389	-1.97882	6.16916e-15	3.22047e-14	-2.33264	4.28473e-31	4.22509e-30	-3.05931	5.93499e-24	3.53175e-23	chrIV	565927	567555	1629	+	TATA-less	1_mis	TFIID-dominated	TAF1-enriched	NA	TFIID
YDR058C	-2.35667	9.27114e-20	2.0434e-19	-4.65474	3.85615e-47	1.10436e-46	-2.99454	5.1989e-38	2.27753e-37	-5.4117	2.02076e-32	3.62671e-32	-1.13108	0.00521148	0.00986683	-2.41543	1.30179e-08	3.06848e-08	-2.5342	5.00979e-20	1.63024e-19	-3.82169	1.1007e-18	4.05811e-18	chrIV	567723	568703	981	-	NA	NA	TFIID-dominated	NA	NA	TFIID
YDR059C	-2.02504	1.39173e-20	3.20978e-20	-3.41254	1.07288e-51	3.60908e-51	-2.78493	8.6141e-33	2.27729e-32	-4.33361	3.06618e-28	4.96615e-28	-1.13479	0.000224446	0.000642052	-1.96309	4.11454e-12	1.47147e-11	-2.30007	4.07484e-12	8.00958e-12	-3.48161	2.18328e-11	4.76074e-11	chrIV	569234	569770	537	-	TATA-containing	0_mis	TFIID-dominated	TAF1-enriched	NA	TFIID
YDR060W	-1.4676	1.84525e-20	4.22027e-20	-1.54838	1.9557e-22	3.04521e-22	-2.09232	6.46425e-22	9.65391e-22	-3.02975	1.28497e-33	2.38884e-33	-0.233645	0.107457	0.144002	-0.0514548	0.723428	0.766431	-0.904144	3.03015e-09	5.24861e-09	-0.507366	0.00879905	0.0119607	chrIV	570649	573726	3078	+	NA	NA	TFIID-dominated	NA	NA	TFIID
YDR062W	-2.42014	4.52772e-55	6.72199e-54	-3.20467	2.52568e-92	4.87989e-91	-3.05844	1.11676e-43	9.46918e-43	-4.4314	7.38004e-52	5.11819e-51	-0.883674	4.30495e-10	5.86977e-09	-1.24227	5.3408e-19	5.11481e-18	-1.21033	1.92386e-11	3.66443e-11	-1.17835	3.13001e-08	5.68475e-08	chrIV	576474	578159	1686	+	TATA-less	2_mis	TFIID-dominated	TAF1-enriched	NA	TFIID
YDR063W	-2.04206	1.77883e-21	4.27205e-21	-3.70621	2.714e-55	1.03361e-54	-2.63194	2.76389e-34	8.28302e-34	-4.46725	1.74421e-36	3.59894e-36	-0.70307	0.000982956	0.00230699	-1.15388	2.86874e-08	6.48839e-08	-1.39313	7.76208e-11	1.43772e-10	-2.01751	3.42445e-13	8.32746e-13	chrIV	578663	579112	450	+	NA	NA	TFIID-dominated	NA	NA	TFIID
YDR064W	-2.88462	1.34877e-65	3.10444e-64	-2.77504	1.69185e-60	7.9265e-60	-2.97731	3.1597e-50	6.40245e-49	-4.11459	1.3987e-54	1.3412e-53	0.00174065	0.989603	0.991251	0.026105	0.844733	0.873166	0.109978	0.516991	0.576518	-0.0768269	0.642664	0.689157	chrIV	579458	580452	995	+	TATA-less	2_mis	TFIID-dominated	TAF1-enriched	RPG	TFIID
YDR065W	-2.90323	1.45143e-34	7.40726e-34	-5.19266	5.143e-82	5.81151e-81	-3.93477	3.78542e-77	1.81349e-74	-5.58904	1.64084e-58	2.56634e-57	-1.54214	2.22276e-05	8.57858e-05	-2.51538	8.67746e-13	3.38255e-12	-3.45958	5.03137e-47	3.85817e-45	-3.81625	2.08121e-23	1.18032e-22	chrIV	580687	581784	1098	+	NA	NA	TFIID-dominated	NA	NA	TFIID
YDR066C	-1.77609	1.99691e-08	2.77263e-08	-3.02499	5.926e-18	8.62799e-18	-2.89584	1.60237e-26	2.81264e-26	-3.67765	1.55408e-14	2.11467e-14	-0.931385	0.0614544	0.0875445	-1.08231	0.0260086	0.0347189	-2.03902	1.289e-06	1.99851e-06	-3.6701	9.19417e-10	1.8254e-09	chrIV	581908	582498	591	-	NA	NA	TFIID-dominated	NA	NA	TFIID
YDR068W	-1.27726	1.69556e-09	2.41634e-09	-3.06799	8.44335e-43	2.1167e-42	-2.30607	1.37519e-20	1.98867e-20	-4.30176	7.70811e-40	1.88399e-39	-0.402285	0.0892701	0.12183	-1.34431	1.16376e-08	2.75903e-08	-1.35588	6.41089e-15	1.45851e-14	-2.1691	2.75411e-16	8.31972e-16	chrIV	583713	584645	933	+	TATA-less	2_mis	TFIID-dominated	TAF1-enriched	NA	TFIID
YDR069C	-1.21876	2.07484e-14	3.51304e-14	-2.47206	2.41856e-53	8.68076e-53	-2.03594	1.69003e-22	2.56682e-22	-3.53263	1.87607e-42	5.40221e-42	-0.475688	0.0184009	0.029985	-1.42092	1.13609e-12	4.3457e-12	-1.70282	5.73843e-26	3.10657e-25	-2.54581	3.0319e-31	4.06873e-30	chrIV	584939	587719	2781	-	TATA-less	1_mis	TFIID-dominated	TAF1-enriched	NA	CR
YDR070C	-4.04519	1.02018e-11	1.55292e-11	-3.93807	1.15255e-09	1.52378e-09	-2.78621	0.0117047	0.0136837	-4.78708	0.000223406	0.000277344	-1.64585	0.00223289	0.00470752	-1.18844	0.0223623	0.0299677	-0.607319	0.494232	0.553031	-1.81723	0.132656	0.162414	chrIV	588098	588379	282	-	NA	NA	nocall	NA	NA	NA
YDR071C	-2.0872	2.93892e-41	2.21274e-40	-3.08905	5.74416e-85	7.71021e-84	-2.74304	3.30593e-43	2.64277e-42	-4.37314	1.91624e-61	4.1535e-60	-0.700577	3.18729e-06	1.58784e-05	-1.57227	4.66529e-26	1.22553e-24	-1.44886	8.53911e-23	3.43568e-22	-2.1465	1.14797e-26	9.27763e-26	chrIV	588827	589402	576	-	TATA-less	2_mis	TFIID-dominated	TAF1-depleted	NA	TFIID
YDR072C	-2.26436	1.24479e-38	7.97201e-38	-3.0052	6.11881e-64	3.27882e-63	-2.65131	1.51514e-37	6.29229e-37	-4.22421	2.59703e-49	1.35082e-48	-1.21289	1.38371e-09	1.65413e-08	-1.94909	7.61422e-22	1.17187e-20	-2.13425	4.30357e-31	4.23726e-30	-2.71588	4.36309e-25	2.98281e-24	chrIV	589761	591344	1584	-	TATA-containing	0_mis	TFIID-dominated	TAF1-depleted	NA	CR
YDR073W	-3.21652	2.08653e-42	1.68173e-41	-2.58912	1.7759e-26	2.94652e-26	-2.9577	1.03961e-26	1.84218e-26	-4.51966	1.43341e-15	1.96875e-15	-1.46247	3.29767e-05	0.000121874	-1.94928	3.26098e-08	7.33245e-08	-2.07319	0.00252639	0.00339456	-1.7239	0.0668289	0.0845669	chrIV	592439	592948	510	+	TATA-containing	0_mis	TFIID-dominated	TAF1-depleted	NA	CR
YDR074W	-2.03099	3.12566e-42	2.49e-41	-4.06502	5.07361e-156	1.02353e-153	-3.08522	3.70847e-61	3.60474e-59	-4.97054	6.5594e-75	6.90889e-73	-0.304263	0.0261391	0.0409841	-1.89297	1.20465e-43	2.12963e-41	-2.10575	2.78453e-40	8.40258e-39	-3.06772	7.16893e-55	7.96619e-53	chrIV	593893	596583	2691	+	TATA-less	1_mis	TFIID-dominated	TAF1-depleted	NA	CR
YDR075W	-1.45855	2.4291e-13	3.92768e-13	-2.23348	4.8769e-27	8.17266e-27	-2.22011	1.10726e-21	1.64446e-21	-3.57092	6.49771e-30	1.09202e-29	-1.10119	6.31503e-06	2.89865e-05	-0.989797	5.02608e-05	8.27266e-05	-1.98255	4.17827e-17	1.08276e-16	-2.31392	1.24394e-09	2.45252e-09	chrIV	597156	598082	927	+	TATA-less	2_mis	TFIID-dominated	TAF1-enriched	NA	TFIID
YDR076W	-1.36328	7.03269e-09	9.87254e-09	-2.03036	8.55787e-16	1.20928e-15	-2.41674	2.44001e-24	3.90296e-24	-3.60401	2.85717e-21	4.15896e-21	-0.77093	0.0412302	0.0613809	-0.884115	0.0223684	0.0299696	-2.17807	2.08231e-12	4.15188e-12	-3.11254	9.81576e-10	1.94526e-09	chrIV	598468	599688	1221	+	TATA-less	1_mis	TFIID-dominated	TAF1-enriched	NA	TFIID
YDR077W	-2.90812	3.19603e-63	6.78686e-62	-3.5821	2.40468e-92	4.67243e-91	-3.34799	8.63963e-50	1.66991e-48	-4.79463	5.57066e-52	3.91164e-51	-0.344296	0.00561996	0.0105306	-0.864039	5.8084e-12	2.04152e-11	-1.2253	0.00162673	0.0022108	-1.33458	0.000126243	0.000191034	chrIV	600793	601809	1017	+	TATA-containing	0_mis	TFIID-dominated	TAF1-depleted	NA	CR
YDR078C	-1.08786	0.000202769	0.000260839	-2.22199	5.26995e-13	7.22498e-13	-1.85754	5.90772e-14	7.76011e-14	-3.82645	1.89215e-17	2.64023e-17	0.0675598	0.877926	0.895347	-1.14635	0.00940135	0.0130036	-1.43712	2.86168e-06	4.38263e-06	-1.98049	2.70658e-06	4.47347e-06	chrIV	602198	602869	672	-	TATA-less	2_mis	TFIID-dominated	TAF1-depleted	NA	TFIID
YDR079C-A	-1.65729	4.49066e-05	5.8469e-05	-3.17773	6.55772e-13	8.97971e-13	-2.30824	2.45079e-06	3.01827e-06	-3.83293	7.20648e-14	9.73525e-14	-0.87601	0.0288864	0.0447895	-0.769016	0.0507931	0.0659463	-0.850778	0.0644678	0.0801451	-1.04952	0.00236099	0.00332077	chrIV	603593	603811	219	-	NA	NA	NA	NA	NA	TFIID
YDR079W	-2.38507	1.98825e-25	6.02093e-25	-3.31753	1.26036e-40	2.96462e-40	-2.98227	3.92351e-36	1.40048e-35	-4.55094	2.51634e-29	4.1708e-29	-1.11249	0.000328253	0.000888391	-2.22078	1.11395e-12	4.27603e-12	-2.10609	5.78732e-13	1.18622e-12	-2.96613	5.40608e-18	1.88045e-17	chrIV	603064	603399	336	+	NA	NA	TFIID-dominated	NA	NA	TFIID
YDR080W	-1.30657	2.15863e-16	3.99947e-16	-3.1869	3.42712e-81	3.71941e-80	-2.68038	7.68298e-31	1.72977e-30	-4.55073	9.39599e-51	5.77905e-50	-0.195429	0.368898	0.428635	-1.1482	1.56758e-07	3.2738e-07	-1.98796	1.10698e-21	4.12066e-21	-2.35136	1.41823e-13	3.53043e-13	chrIV	604008	606986	2979	+	TATA-less	1_mis	TFIID-dominated	TAF1-depleted	NA	TFIID
YDR081C	-0.837189	5.23902e-08	7.20851e-08	-1.6029	4.6329e-25	7.49105e-25	-1.80476	6.54626e-19	9.13941e-19	-3.09462	1.29465e-30	2.21616e-30	0.194815	0.295954	0.3533	-0.176373	0.335475	0.390244	-1.25548	3.3158e-11	6.24455e-11	-1.42636	3.68701e-10	7.491e-10	chrIV	607304	610081	2778	-	TATA-less	1_mis	TFIID-dominated	TAF1-enriched	NA	TFIID
YDR082W	-1.44362	1.26126e-13	2.06418e-13	-2.61519	1.46788e-37	3.15124e-37	-2.56016	4.18693e-29	8.46856e-29	-4.08139	8.08163e-32	1.42315e-31	-0.779664	0.00751051	0.0135658	-1.34515	3.45829e-06	6.30982e-06	-2.19604	3.39133e-20	1.11922e-19	-2.75853	1.90242e-15	5.38057e-15	chrIV	610441	611925	1485	+	TATA-less	1_mis	TFIID-dominated	TAF1-enriched	NA	TFIID
YDR083W	-1.57618	2.46591e-16	4.56016e-16	-2.05202	8.74634e-25	1.40758e-24	-2.6377	7.9379e-32	1.93387e-31	-3.91847	1.17359e-33	2.1836e-33	-1.00437	3.94642e-06	1.91369e-05	-0.721311	0.0012797	0.00189636	-1.98779	1.99147e-21	7.25567e-21	-2.82582	1.04606e-18	3.87197e-18	chrIV	612073	613251	1179	+	TATA-less	2_mis	TFIID-dominated	TAF1-depleted	NA	TFIID
YDR084C	-2.22611	3.07885e-22	7.72414e-22	-3.23147	3.4691e-41	8.26488e-41	-2.92594	1.66238e-37	6.86549e-37	-4.63532	1.93848e-35	3.84785e-35	-1.07532	1.19801e-05	5.05162e-05	-1.5158	2.54384e-10	7.25339e-10	-1.24997	3.9829e-07	6.29194e-07	-2.1255	9.08949e-12	2.02603e-11	chrIV	613405	614004	600	-	TATA-less	1_mis	TFIID-dominated	TAF1-depleted	NA	TFIID
YDR085C	-2.14489	4.23019e-18	8.55391e-18	-4.28759	8.05309e-53	2.83117e-52	-3.07318	2.20029e-39	1.1109e-38	-4.40873	1.32775e-37	2.89095e-37	-1.64173	7.17483e-06	3.24434e-05	-2.03974	5.92895e-09	1.45085e-08	-2.19109	4.83468e-12	9.46605e-12	-2.82098	2.96887e-12	6.7964e-12	chrIV	614288	616150	1863	-	NA	NA	SAGA-dominated	NA	NA	TFIID
YDR086C	-2.5654	1.92357e-31	8.22042e-31	-2.79013	1.09885e-35	2.25052e-35	-2.64	3.32863e-30	7.19934e-30	-4.00464	2.31767e-43	7.10156e-43	-0.415063	0.00420665	0.00818093	-0.630616	1.0876e-05	1.89151e-05	-0.46191	0.00577495	0.00763919	-0.468826	0.00933633	0.0126752	chrIV	616928	617170	243	-	TATA-less	2_mis	SAGA-dominated	TAF1-depleted	NA	TFIID
YDR087C	-1.49386	4.17332e-17	8.0339e-17	-1.30537	7.83823e-13	1.07225e-12	-2.35058	2.08479e-25	3.48087e-25	-3.39766	1.30587e-33	2.42704e-33	-0.316289	0.0905683	0.123377	-0.0990961	0.599862	0.653514	-1.41414	1.66599e-17	4.44491e-17	-1.64282	1.6666e-13	4.13134e-13	chrIV	617470	618306	837	-	TATA-less	1_mis	TFIID-dominated	TAF1-depleted	NA	TFIID
YDR088C	-2.09685	9.01797e-26	2.79757e-25	-4.01863	5.46694e-71	3.92236e-70	-3.38346	4.87028e-40	2.65569e-39	-4.88138	1.28809e-41	3.51538e-41	-1.17828	5.90954e-05	0.000201898	-2.20603	3.13427e-13	1.29673e-12	-3.14645	1.62313e-30	1.4964e-29	-4.31178	1.00847e-18	3.74301e-18	chrIV	618497	619645	1149	-	TATA-containing	0_mis	TFIID-dominated	TAF1-enriched	NA	TFIID
YDR089W	-2.60979	5.13657e-48	5.55706e-47	-3.14768	2.55808e-66	1.52176e-65	-2.60374	9.36915e-35	2.90921e-34	-4.35036	2.14157e-53	1.74141e-52	-1.21629	4.23972e-09	4.6606e-08	-1.7521	9.02443e-18	7.15501e-17	-1.93704	2.00744e-24	9.37956e-24	-2.64688	2.05064e-22	1.04979e-21	chrIV	622112	624721	2610	+	TATA-less	1_mis	TFIID-dominated	TAF1-enriched	NA	CR
YDR090C	-1.66201	1.39158e-15	2.48758e-15	-2.21422	7.68307e-26	1.25771e-25	-2.38053	3.62558e-25	5.98051e-25	-3.60997	2.47975e-29	4.1142e-29	-0.824888	0.00447317	0.0086486	-1.71249	1.82005e-09	4.69437e-09	-1.98582	3.4544e-13	7.16834e-13	-2.81218	4.01656e-15	1.11047e-14	chrIV	625066	625998	933	-	TATA-containing	0_mis	TFIID-dominated	TAF1-depleted	NA	TFIID
YDR091C	-1.71991	1.34199e-27	4.58172e-27	-1.7362	7.02826e-28	1.19709e-27	-2.1227	1.02813e-24	1.66482e-24	-3.39554	8.31964e-42	2.29753e-41	-0.435382	0.00284832	0.00580378	-0.585394	5.91645e-05	9.68455e-05	-1.03301	2.01045e-10	3.65935e-10	-1.22857	5.01274e-09	9.51764e-09	chrIV	626708	628534	1827	-	TATA-less	2_mis	nocall	TAF1-enriched	NA	TFIID
YDR092W	-1.90801	1.22081e-21	2.96199e-21	-2.45763	1.4866e-33	2.89347e-33	-2.53168	6.81737e-29	1.35962e-28	-4.48482	2.0077e-33	3.70894e-33	-0.516252	0.00341775	0.0068412	-1.40761	1.26558e-16	8.49042e-16	-1.35722	4.32989e-08	7.1721e-08	-1.9774	3.4229e-11	7.40927e-11	chrIV	629876	630605	730	+	NA	NA	SAGA/TFIID-dominated	NA	NA	TFIID
YDR093W	-2.1841	4.79095e-60	8.95399e-59	-3.07414	4.35486e-114	2.14892e-112	-2.7241	5.57855e-39	2.71322e-38	-4.10776	6.49127e-52	4.5251e-51	-1.32633	8.90999e-19	5.58081e-17	-1.70929	2.52382e-31	1.19625e-29	-2.11505	3.16728e-45	1.84324e-43	-2.70435	1.44649e-39	4.99154e-38	chrIV	631282	636120	4839	+	TATA-less	2_mis	nocall	TAF1-enriched	NA	TFIID
YDR096W	-1.62759	2.09489e-22	5.30999e-22	-3.61131	3.25663e-99	8.52567e-98	-3.04045	4.59699e-40	2.5169e-39	-4.83225	1.22172e-54	1.17989e-53	-0.429863	0.0537721	0.0775561	-2.02404	5.71132e-20	6.47448e-19	-2.67217	4.00318e-12	7.87586e-12	-2.90032	0.00174355	0.00247475	chrIV	637139	639823	2685	+	NA	NA	SAGA-dominated	NA	NA	TFIID
YDR097C	-1.60715	2.21947e-31	9.43205e-31	-1.90152	2.42189e-41	5.8002e-41	-2.7016	3.57973e-31	8.26765e-31	-4.05709	2.70042e-57	3.54154e-56	-0.119281	0.48329	0.540957	-0.123025	0.468815	0.525358	-0.969626	8.70902e-10	1.54254e-09	-0.890679	1.6803e-05	2.6664e-05	chrIV	640109	643837	3729	-	TATA-less	2_mis	TFIID-dominated	TAF1-enriched	NA	TFIID
YDR098C	-2.04698	4.72296e-37	2.78067e-36	-2.87902	4.09213e-68	2.63054e-67	-2.72154	1.05005e-43	8.94876e-43	-4.45275	1.90606e-51	1.26714e-50	-0.858306	1.01894e-06	5.80748e-06	-1.35427	3.69912e-15	1.98165e-14	-1.44311	1.86635e-17	4.95919e-17	-1.64154	8.52452e-14	2.15158e-13	chrIV	644178	644930	753	-	TATA-less	2_mis	TFIID-dominated	TAF1-enriched	NA	TFIID
YDR099W	-2.15735	2.05913e-38	1.29574e-37	-3.16486	1.06286e-79	1.08163e-78	-2.62516	4.69846e-42	3.24203e-41	-3.89042	1.64361e-44	5.49308e-44	-0.114935	0.322115	0.380004	-0.777707	1.34957e-11	4.51768e-11	-0.436986	0.0466986	0.0587269	-1.11987	0.000309213	0.000458547	chrIV	653607	654428	822	+	NA	NA	TFIID-dominated	NA	NA	TFIID
YDR100W	-1.89132	3.02862e-18	6.16785e-18	-3.52051	1.15577e-54	4.30839e-54	-2.56325	2.13441e-29	4.38722e-29	-4.2352	1.53209e-41	4.15775e-41	-0.639193	0.00328553	0.00662726	-1.3023	1.48421e-09	3.84942e-09	-1.36591	2.54081e-10	4.6054e-10	-2.28552	1.30471e-14	3.4989e-14	chrIV	655013	655444	432	+	TATA-less	1_mis	nocall	TAF1-enriched	NA	TFIID
YDR101C	-1.54182	9.00551e-22	2.20053e-21	-1.21433	6.34092e-14	8.76332e-14	-2.27955	7.75458e-31	1.74413e-30	-3.29262	4.1788e-40	1.03564e-39	-0.451819	0.0123204	0.0209629	-0.36198	0.0455463	0.0594766	-1.29532	6.71611e-17	1.72074e-16	-1.31316	1.0779e-09	2.13291e-09	chrIV	655686	657467	1782	-	TATA-less	2_mis	TFIID-dominated	TAF1-enriched	NA	TFIID
YDR103W	-1.6255	2.85612e-25	8.55839e-25	-2.41543	1.24398e-52	4.34223e-52	-2.63593	1.23764e-36	4.64773e-36	-4.17803	1.27619e-45	4.71902e-45	-0.686378	9.13879e-05	0.000296875	-1.31824	2.89174e-14	1.37964e-13	-1.94166	1.44747e-28	1.06968e-27	-2.45963	2.14796e-23	1.21501e-22	chrIV	658350	661103	2754	+	TATA-less	1_mis	TFIID-dominated	TAF1-enriched	NA	TFIID
YDR104C	-1.73798	3.14018e-28	1.11425e-27	-3.40211	1.14185e-92	2.28337e-91	-3.27208	2.36971e-54	7.90727e-53	-4.77163	9.33142e-65	2.98119e-63	-0.757842	0.000905643	0.00214395	-2.17581	1.77457e-20	2.19009e-19	-2.02702	3.92033e-19	1.1896e-18	-3.29665	8.27805e-32	1.18398e-30	chrIV	661173	664910	3738	-	TATA-less	1_mis	TFIID-dominated	TAF1-enriched	NA	TFIID
YDR105C	-1.58196	1.17025e-18	2.43235e-18	-2.75845	8.83926e-50	2.79137e-49	-2.25628	7.15854e-26	1.22231e-25	-3.94301	4.29039e-42	1.20657e-41	-0.399726	0.0711874	0.099732	-1.29801	3.68383e-09	9.18989e-09	-1.89163	1.09651e-19	3.47788e-19	-2.68651	5.91037e-15	1.61084e-14	chrIV	665349	666770	1422	-	NA	NA	TFIID-dominated	NA	NA	TFIID
YDR106W	-1.11041	0.00132464	0.00167478	-1.89564	8.96264e-07	1.15035e-06	-1.57372	4.60967e-07	5.7222e-07	-3.16508	1.64578e-06	2.09919e-06	-0.403303	0.440465	0.499721	-1.63463	0.00241669	0.00349957	-0.941333	0.0599665	0.0748348	-1.53398	0.105735	0.130731	chrIV	667004	667858	855	+	NA	NA	TFIID-dominated	NA	NA	NA
YDR107C	-2.65152	1.62996e-40	1.16701e-39	-4.2714	5.15983e-84	6.54183e-83	-3.21127	1.12428e-47	1.62862e-46	-4.67717	1.13744e-44	3.85883e-44	-1.33276	1.02906e-06	5.84298e-06	-1.82345	6.70438e-12	2.33138e-11	-1.6627	5.079e-15	1.16198e-14	-1.77006	2.07729e-11	4.53567e-11	chrIV	669016	671034	2019	-	NA	NA	TFIID-dominated	NA	NA	TFIID
YDR108W	-1.65993	1.68718e-20	3.86907e-20	-2.628	8.43996e-46	2.29812e-45	-2.58955	2.46538e-35	8.09364e-35	-4.22126	3.41926e-48	1.58632e-47	-0.720818	0.00527344	0.00996519	-1.68988	7.11867e-11	2.18095e-10	-2.14913	3.21982e-26	1.82019e-25	-3.08361	1.34006e-22	6.94743e-22	chrIV	671269	673365	2097	+	NA	NA	TFIID-dominated	NA	NA	TFIID
YDR109C	-1.45262	7.94438e-14	1.31018e-13	-2.96317	1.27866e-48	3.85338e-48	-2.29734	7.4921e-29	1.4902e-28	-3.76398	6.30431e-41	1.65167e-40	-0.557932	0.0210994	0.0338232	-1.1847	6.70407e-07	1.32082e-06	-1.95891	2.3993e-24	1.11228e-23	-2.08023	7.35075e-16	2.13453e-15	chrIV	673520	675667	2148	-	NA	NA	TFIID-dominated	NA	NA	TFIID
YDR110W	-1.5195	9.66681e-19	2.01902e-18	-1.77591	8.35992e-24	1.3258e-23	-2.17145	2.83087e-21	4.16556e-21	-3.72794	1.53026e-34	2.94307e-34	-0.53744	0.0227108	0.036194	-0.661375	0.00496332	0.00702403	-1.58313	1.00237e-19	3.19329e-19	-2.02591	2.62874e-14	6.91595e-14	chrIV	676102	677802	1701	+	TATA-less	2_mis	TFIID-dominated	TAF1-enriched	NA	TFIID
YDR113C	-2.1862	8.58475e-28	2.9649e-27	-2.96229	1.14699e-44	3.03517e-44	-3.11	4.94963e-41	3.07381e-40	-5.04996	1.86659e-38	4.20543e-38	-1.32224	1.46293e-05	5.97595e-05	-1.80098	1.33607e-09	3.48732e-09	-2.788	1.54854e-17	4.15023e-17	-3.81671	1.18867e-14	3.19297e-14	chrIV	680496	681617	1122	-	TATA-less	1_mis	TFIID-dominated	TAF1-enriched	NA	TFIID
YDR115W	-1.86281	1.41309e-19	3.08282e-19	-2.78255	3.89047e-38	8.4929e-38	-2.35616	1.84881e-23	2.88572e-23	-4.47097	4.74955e-43	1.4255e-42	-0.598594	0.00620402	0.0114784	-1.78922	8.64505e-16	5.03089e-15	-1.67027	7.04859e-08	1.15636e-07	-2.70987	1.2524e-13	3.12956e-13	chrIV	682175	682492	318	+	TATA-less	2_mis	TFIID-dominated	TAF1-enriched	NA	TFIID
YDR116C	-1.90615	5.91308e-26	1.85027e-25	-3.34118	4.29445e-69	2.87092e-68	-2.82585	2.30475e-40	1.31894e-39	-4.31592	1.94341e-44	6.45982e-44	-0.867411	0.000331563	0.000896666	-2.06202	5.901e-17	4.12818e-16	-2.53805	4.33049e-28	2.98374e-27	-3.70706	2.41491e-31	3.28126e-30	chrIV	682724	683581	858	-	TATA-less	2_mis	TFIID-dominated	TAF1-enriched	NA	TFIID
YDR117C	-2.15195	4.17512e-40	2.93113e-39	-3.14205	4.26521e-78	4.08591e-77	-2.83753	1.0087e-37	4.27645e-37	-4.30547	4.05051e-49	2.08272e-48	-0.835851	2.18411e-05	8.46747e-05	-1.80244	2.05392e-20	2.51115e-19	-1.99742	6.49484e-23	2.63595e-22	-2.25529	4.1701e-13	1.00694e-12	chrIV	683946	685643	1698	-	TATA-less	2_mis	TFIID-dominated	TAF1-enriched	NA	TFIID
YDR118W	-1.63999	1.52889e-16	2.85819e-16	-3.14184	1.18187e-48	3.5664e-48	-2.28856	1.26307e-24	2.0418e-24	-4.101	1.86757e-38	4.20623e-38	-0.583217	0.0725948	0.101515	-1.96531	5.68511e-09	1.39536e-08	-2.0781	3.8151e-10	6.85792e-10	-2.3269	1.37928e-05	2.19942e-05	chrIV	685882	687840	1959	+	TATA-less	2_mis	TFIID-dominated	TAF1-enriched	NA	TFIID
YDR119W-A	-2.98214	9.70144e-07	1.29838e-06	-3.30126	4.91159e-06	6.2595e-06	-2.92638	0.000241696	0.000290511	-4.07701	4.41279e-05	5.53014e-05	-1.05604	0.0791378	0.109518	-1.27936	0.0332132	0.0439239	-0.227417	0.806877	0.842689	-2.09496	0.0549833	0.0701077	chrIV	691014	691214	201	+	NA	NA	NA	NA	NA	NA
YDR120C	-1.46907	2.49698e-18	5.10638e-18	-1.40472	2.41441e-16	3.43649e-16	-2.25068	1.10332e-24	1.78485e-24	-3.22324	6.31506e-32	1.11585e-31	-0.47486	0.00263125	0.00542034	-0.239591	0.130124	0.161753	-1.21393	3.29426e-13	6.84039e-13	-1.08761	3.56146e-07	6.12225e-07	chrIV	691549	693261	1713	-	TATA-less	1_mis	SAGA/TFIID-dominated	TAF1-enriched	NA	TFIID
YDR121W	-1.53262	5.6669e-13	9.03517e-13	-1.81348	2.02284e-16	2.88274e-16	-2.22744	2.42485e-21	3.57438e-21	-3.96695	1.47353e-32	2.65378e-32	-0.308886	0.19979	0.249826	-0.782816	0.000975472	0.00145841	-1.50435	5.78671e-11	1.07765e-10	-2.35532	1.1766e-15	3.38351e-15	chrIV	693585	694175	591	+	TATA-less	2_mis	nocall	TAF1-depleted	NA	TFIID
YDR122W	-1.2592	5.9229e-18	1.19066e-17	-2.62739	8.44802e-72	6.22395e-71	-2.3933	7.19806e-33	1.91273e-32	-3.86981	2.1996e-44	7.28266e-44	-0.120814	0.392878	0.453345	-1.18846	7.58339e-18	6.05653e-17	-1.86238	1.65784e-24	7.81894e-24	-2.0686	5.71596e-23	3.06323e-22	chrIV	694700	697894	3195	+	TATA-less	3_mis	TFIID-dominated	TAF1-enriched	NA	TFIID
YDR123C	-2.03716	7.72474e-22	1.89431e-21	-1.96227	6.14637e-19	9.06818e-19	-2.59991	4.57709e-27	8.2523e-27	-3.74205	2.6058e-22	3.84034e-22	-1.33364	2.95181e-05	0.000110175	-1.31315	3.91974e-05	6.50902e-05	-2.12138	7.40792e-08	1.21349e-07	-2.1428	4.00647e-05	6.22e-05	chrIV	698554	699468	915	-	TATA-less	2_mis	TFIID-dominated	TAF1-enriched	NA	TFIID
YDR125C	-2.70957	2.97946e-24	8.39265e-24	-3.8179	2.53637e-38	5.56881e-38	-3.20895	4.0602e-38	1.80104e-37	-4.88734	9.23607e-34	1.72562e-33	-1.4646	0.000439912	0.00114858	-1.66454	4.7205e-05	7.78342e-05	-2.41115	2.2448e-14	4.96829e-14	-2.1664	1.34287e-06	2.25262e-06	chrIV	701397	702758	1362	-	NA	NA	TFIID-dominated	NA	NA	TFIID
YDR126W	-1.62127	6.38387e-09	8.97274e-09	-1.87313	2.14142e-10	2.85536e-10	-1.80373	1.78903e-12	2.31776e-12	-3.34673	2.0382e-11	2.7105e-11	-0.844514	0.0469658	0.0688793	-0.938252	0.0236249	0.0316143	-1.11821	0.0221897	0.0284094	-1.29957	0.0840492	0.105174	chrIV	703234	704244	1011	+	TATA-containing	0_mis	TFIID-dominated	TAF1-enriched	NA	NA
YDR127W	-1.26052	5.35274e-21	1.25605e-20	-1.91451	3.36299e-46	9.33498e-46	-1.68956	3.55985e-17	4.85777e-17	-3.20142	9.45476e-34	1.76599e-33	0.470352	5.39079e-06	2.5176e-05	0.341631	0.000823228	0.00123531	0.0220486	0.880323	0.897957	-0.107904	0.555697	0.608301	chrIV	704484	709250	4767	+	TATA-less	1_mis	TFIID-dominated	TAF1-enriched	NA	CR
YDR128W	-1.2366	4.84158e-18	9.77581e-18	-2.43175	6.82135e-63	3.47605e-62	-2.33335	2.28142e-26	3.98507e-26	-3.28414	2.05539e-34	3.93284e-34	-0.396232	0.0110446	0.0190617	-0.751727	6.95567e-07	1.36833e-06	-1.56179	1.85225e-22	7.26411e-22	-1.26859	3.75325e-10	7.61389e-10	chrIV	709549	712995	3447	+	TATA-less	2_mis	nocall	TAF1-enriched	NA	TFIID
YDR129C	-2.24802	1.68783e-64	3.73447e-63	-3.23333	1.35224e-128	1.09117e-126	-2.50961	2.42517e-37	9.85198e-37	-3.88541	7.39945e-52	5.12638e-51	-0.251964	0.0351182	0.0532977	-0.861133	3.60933e-13	1.47831e-12	-0.702851	3.17794e-06	4.8567e-06	-0.595558	0.00214188	0.00302628	chrIV	713340	715379	2040	-	TATA-less	1_mis	TFIID-dominated	TAF1-enriched	NA	TFIID
YDR130C	-2.00937	2.27129e-27	7.64792e-27	-2.66223	1.99795e-43	5.10199e-43	-2.19295	1.53577e-23	2.40382e-23	-3.77584	6.4346e-37	1.35846e-36	-0.994878	0.000304009	0.000830157	-1.677	6.3691e-10	1.73296e-09	-2.20775	1.44093e-22	5.70594e-22	-2.92274	1.83742e-25	1.32124e-24	chrIV	715747	716622	876	-	TATA-less	1_mis	TFIID-dominated	TAF1-depleted	NA	TFIID
YDR131C	-1.67722	9.0614e-16	1.63429e-15	-3.34293	8.59755e-51	2.82562e-50	-2.60114	5.46681e-32	1.35473e-31	-4.17604	2.8369e-41	7.57368e-41	-0.859566	0.00579313	0.0108224	-2.02409	1.16707e-10	3.48099e-10	-1.95154	3.28398e-18	9.29843e-18	-2.60484	4.1431e-17	1.33703e-16	chrIV	716790	718460	1671	-	TATA-less	1_mis	TFIID-dominated	TAF1-enriched	NA	TFIID
YDR132C	-2.0165	9.70528e-29	3.56936e-28	-4.66664	2.19325e-142	2.63922e-140	-3.30811	1.19343e-58	8.25187e-57	-4.46377	4.19e-66	1.58679e-64	-1.12136	1.4604e-05	5.96965e-05	-3.0077	6.21137e-36	4.83673e-34	-3.04342	1.17699e-71	4.51271e-69	-3.54019	1.99229e-63	3.9375e-61	chrIV	718816	720303	1488	-	TATA-less	2_mis	SAGA-dominated	TAF1-enriched	NA	CR
YDR135C	-2.28774	1.15275e-49	1.34012e-48	-3.92258	9.70176e-143	1.24266e-140	-2.29578	5.78858e-31	1.31518e-30	-4.03071	4.18868e-57	5.27773e-56	-0.664269	9.23227e-08	7.02704e-07	-1.84797	8.26798e-52	4.16006e-49	-1.43407	7.22506e-23	2.92321e-22	-1.99064	4.05918e-26	3.09276e-25	chrIV	723004	727551	4548	-	TATA-containing	0_mis	TFIID-dominated	TAF1-enriched	NA	CR
YDR137W	-1.61507	5.36406e-25	1.57568e-24	-2.90961	1.18386e-71	8.68457e-71	-2.46598	7.5655e-32	1.8465e-31	-4.0002	5.66451e-48	2.56616e-47	-0.753955	0.000398956	0.00105494	-1.76712	5.51009e-17	3.87127e-16	-2.02882	7.25568e-30	6.19823e-29	-2.66345	2.54647e-23	1.42927e-22	chrIV	728259	730250	1992	+	TATA-less	2_mis	TFIID-dominated	TAF1-enriched	NA	TFIID
YDR138W	-0.954593	7.06059e-09	9.90766e-09	-1.88351	1.51883e-29	2.69121e-29	-1.84732	1.90813e-16	2.57502e-16	-3.35955	8.37223e-34	1.57032e-33	-0.168466	0.356059	0.415483	-0.849324	2.78554e-06	5.13246e-06	-1.31124	3.83992e-11	7.20936e-11	-1.92551	4.73214e-15	1.29949e-14	chrIV	730578	732836	2259	+	TATA-less	2_mis	TFIID-dominated	TAF1-enriched	NA	TFIID
YDR139C	-2.19878	1.6277e-23	4.39716e-23	-3.13029	6.0973e-41	1.44411e-40	-2.29519	1.37891e-18	1.91556e-18	-3.20793	5.71677e-21	8.28926e-21	-0.974612	2.82472e-06	1.43334e-05	-0.959299	1.03727e-06	2.00437e-06	-0.99373	6.83808e-06	1.03006e-05	-1.03632	1.74638e-06	2.91152e-06	chrIV	733618	733924	307	-	NA	NA	TFIID-dominated	NA	NA	TFIID
YDR140W	-2.17072	5.82626e-25	1.70706e-24	-2.50994	8.63292e-31	1.57566e-30	-2.63944	1.25384e-31	3.01416e-31	-4.12991	7.23844e-27	1.14246e-26	-1.24729	3.11269e-05	0.000115749	-1.37139	2.59566e-06	4.80561e-06	-2.43393	8.52499e-19	2.52343e-18	-2.90971	7.21883e-12	1.61458e-11	chrIV	734138	734803	666	+	TATA-containing	0_mis	TFIID-dominated	TAF1-enriched	NA	TFIID
YDR141C	-1.54893	8.45799e-28	2.92406e-27	-2.54409	3.74849e-71	2.69506e-70	-2.25898	2.48569e-26	4.33365e-26	-3.58927	6.97071e-41	1.81708e-40	-0.250487	0.0718431	0.10051	-0.612204	7.36581e-06	1.30392e-05	-1.09581	8.45704e-13	1.71937e-12	-1.27925	4.45988e-11	9.5966e-11	chrIV	734901	739997	5097	-	TATA-less	1_mis	TFIID-dominated	TAF1-enriched	NA	TFIID
YDR142C	-1.70799	4.24389e-18	8.57908e-18	-2.8774	9.52676e-44	2.45747e-43	-2.62934	1.76236e-30	3.87545e-30	-3.93207	2.36112e-34	4.50377e-34	-0.968979	0.00181218	0.0039235	-1.76724	3.70079e-09	9.22869e-09	-2.23869	3.0387e-18	8.63394e-18	-2.71793	3.38807e-16	1.01409e-15	chrIV	740473	741600	1128	-	TATA-less	2_mis	TFIID-dominated	TAF1-depleted	NA	TFIID
YDR143C	-0.974906	6.76584e-07	9.08337e-07	-1.40767	1.11858e-12	1.52683e-12	-1.60617	4.87696e-15	6.47718e-15	-2.81215	1.20454e-21	1.76134e-21	-0.0934499	0.621572	0.669805	-0.612964	0.00106934	0.0015922	-1.05702	2.43227e-07	3.87902e-07	-1.65395	6.52384e-10	1.30838e-09	chrIV	742042	743874	1833	-	TATA-less	1_mis	TFIID-dominated	TAF1-depleted	NA	TFIID
YDR144C	-1.55694	1.0259e-23	2.80568e-23	-1.51533	4.43934e-22	6.86881e-22	-2.02755	9.48965e-26	1.61132e-25	-3.35656	1.66057e-36	3.43056e-36	-0.352516	0.0395556	0.0592841	-0.541419	0.00133491	0.00197415	-1.26531	1.12954e-13	2.40809e-13	-1.53579	1.74722e-10	3.60726e-10	chrIV	744311	746101	1791	-	TATA-less	2_mis	SAGA-dominated	TAF1-depleted	NA	TFIID
YDR145W	-1.04884	3.0331e-09	4.29038e-09	-1.72883	3.21902e-22	4.99079e-22	-1.96489	3.05433e-20	4.38003e-20	-3.49375	8.05453e-40	1.96367e-39	-0.054332	0.736521	0.773032	-0.774732	1.56811e-06	2.97045e-06	-1.24187	7.01433e-14	1.51339e-13	-1.94279	3.25752e-19	1.25121e-18	chrIV	746738	748357	1620	+	TATA-less	1_mis	TFIID-dominated	TAF1-enriched	NA	TFIID
YDR146C	-1.94213	1.04402e-34	5.36803e-34	-2.66768	3.70334e-62	1.83138e-61	-2.65118	1.6847e-32	4.36097e-32	-4.15151	9.30823e-51	5.73554e-50	-0.905758	1.11623e-07	8.31709e-07	-1.66482	1.98697e-22	3.33328e-21	-2.54926	4.021e-23	1.66406e-22	-3.14026	4.04336e-14	1.04729e-13	chrIV	748613	750742	2130	-	TATA-less	1_mis	TFIID-dominated	TAF1-enriched	NA	TFIID
YDR147W	-1.71627	3.45512e-16	6.35353e-16	-2.54974	3.70951e-32	6.97656e-32	-2.39324	7.18587e-30	1.52181e-29	-4.19195	2.45984e-48	1.16282e-47	-0.446346	0.0522534	0.0755651	-1.2962	2.27664e-08	5.20499e-08	-1.56918	1.29962e-16	3.2795e-16	-2.26742	6.0704e-16	1.78018e-15	chrIV	751631	753235	1605	+	TATA-less	2_mis	TFIID-dominated	TAF1-enriched	NA	TFIID
YDR148C	-1.3582	5.54124e-22	1.37112e-21	-2.17369	1.13502e-51	3.81249e-51	-2.11628	1.17866e-25	1.98774e-25	-3.58629	3.20746e-38	7.1476e-38	0.143755	0.267352	0.323393	-0.474696	0.000226067	0.000353591	-0.58272	0.000859478	0.00118131	-0.647008	0.0013699	0.00195375	chrIV	753675	755066	1392	-	TATA-less	1_mis	SAGA-dominated	TAF1-enriched	NA	TFIID
YDR150W	-1.41125	4.38731e-26	1.38484e-25	-2.23385	3.06743e-62	1.518e-61	-2.04677	1.24764e-23	1.95879e-23	-3.43483	3.42527e-39	8.03962e-39	-0.248876	0.0429031	0.0635253	-0.497726	4.54204e-05	7.49861e-05	-1.04115	2.24526e-10	4.07989e-10	-1.18641	1.16813e-09	2.30865e-09	chrIV	755628	763874	8247	+	NA	NA	TFIID-dominated	NA	NA	TFIID
YDR151C	-1.39516	5.4936e-14	9.15912e-14	-1.60971	9.40638e-18	1.36662e-17	-2.20069	2.32871e-24	3.7285e-24	-3.75086	1.55675e-44	5.21055e-44	-0.475971	0.0227247	0.0362065	-0.682204	0.00103665	0.00154528	-1.90618	5.52791e-26	3.00258e-25	-2.6029	1.27316e-26	1.02513e-25	chrIV	764178	765155	978	-	TATA-less	1_mis	TFIID-dominated	TAF1-enriched	NA	TFIID
YDR152W	-1.33519	2.01171e-14	3.40699e-14	-1.65644	1.03826e-20	1.57241e-20	-2.09432	7.73307e-23	1.18307e-22	-3.4623	1.65045e-40	4.18572e-40	-0.383227	0.016633	0.0273786	-1.05587	3.80639e-11	1.20862e-10	-1.5405	7.99503e-19	2.36979e-18	-1.94476	4.45496e-17	1.432e-16	chrIV	765706	766503	798	+	TATA-less	2_mis	TFIID-dominated	TAF1-enriched	NA	TFIID
YDR153C	-1.26708	9.15478e-17	1.73365e-16	-2.36797	1.31331e-52	4.57491e-52	-2.60371	4.25074e-37	1.67409e-36	-3.93893	1.2645e-48	6.18127e-48	-0.296067	0.0891797	0.121734	-1.34513	1.00193e-14	5.10442e-14	-2.05045	1.32368e-24	6.32712e-24	-2.74179	6.7133e-21	3.00509e-20	chrIV	766736	767971	1236	-	TATA-less	1_mis	TFIID-dominated	TAF1-depleted	NA	TFIID
YDR155C	-2.98628	5.11445e-58	8.70472e-57	-2.48722	3.16329e-40	7.31277e-40	-2.86093	6.47114e-46	7.27001e-45	-4.48136	5.76617e-63	1.50658e-61	-0.3764	0.000890286	0.00211509	-0.37945	0.000667171	0.00100671	-0.494969	0.0024902	0.00334663	-0.457682	0.0188647	0.0250174	chrIV	768512	769000	489	-	TATA-containing	0_mis	SAGA-dominated	TAF1-depleted	NA	CR
YDR156W	-1.88274	3.08341e-14	5.18488e-14	-2.05557	1.23696e-15	1.74359e-15	-2.55005	7.07172e-21	1.02952e-20	-3.99855	3.22262e-12	4.30769e-12	-0.912572	0.00193764	0.00415959	-1.30459	8.5903e-06	1.50884e-05	-2.46401	6.3054e-05	9.14522e-05	-3.61915	0.000982878	0.00141602	chrIV	769525	769938	414	+	TATA-less	2_mis	TFIID-dominated	TAF1-enriched	NA	TFIID
YDR158W	-2.29503	4.43929e-07	5.98332e-07	-3.20318	1.90855e-12	2.59891e-12	-2.39662	3.51428e-35	1.13756e-34	-3.86361	7.74694e-53	5.94785e-52	-0.30382	0.0251051	0.0395417	-0.0635297	0.631377	0.682212	-0.359873	0.0102152	0.0133326	-0.247142	0.170785	0.205889	chrIV	770357	771454	1098	+	TATA-less	1_mis	TFIID-dominated	TAF1-depleted	NA	CR
YDR159W	-1.12189	1.49137e-14	2.54207e-14	-2.10176	4.19119e-46	1.1573e-45	-2.20619	9.2868e-25	1.50705e-24	-3.63751	9.44929e-41	2.43306e-40	-0.324563	0.0400148	0.059853	-1.11876	1.26836e-12	4.82344e-12	-1.73819	3.68155e-26	2.06154e-25	-2.22625	5.58661e-24	3.34274e-23	chrIV	771877	775782	3906	+	TATA-less	2_mis	TFIID-dominated	TAF1-enriched	NA	TFIID
YDR160W	-1.50379	5.90421e-19	1.2476e-18	-2.85887	4.6897e-59	2.09146e-58	-2.58361	9.03654e-36	3.09541e-35	-3.87444	2.09037e-44	6.92782e-44	-0.554859	0.025754	0.0404542	-1.27845	2.09461e-07	4.32749e-07	-2.20598	1.43723e-25	7.49431e-25	-2.40588	1.99267e-17	6.59037e-17	chrIV	776163	778721	2559	+	TATA-less	1_mis	TFIID-dominated	TAF1-enriched	NA	TFIID
YDR161W	-1.6541	3.72441e-22	9.31307e-22	-1.871	3.76139e-26	6.19284e-26	-2.3873	2.79214e-26	4.85656e-26	-3.52382	1.15815e-34	2.23506e-34	-0.573166	0.00362887	0.00719669	-0.645002	0.00102127	0.00152375	-1.58617	4.17535e-18	1.17003e-17	-1.8847	4.33994e-14	1.11966e-13	chrIV	779043	780206	1164	+	TATA-less	1_mis	TFIID-dominated	TAF1-enriched	NA	TFIID
YDR162C	-1.05916	7.18858e-06	9.48202e-06	-2.61272	2.16403e-26	3.58096e-26	-2.24031	3.44365e-20	4.92569e-20	-3.97472	1.67933e-36	3.46825e-36	-0.313125	0.301791	0.359555	-1.27053	1.57604e-05	2.7022e-05	-1.75358	2.82798e-17	7.43257e-17	-2.4319	3.10203e-15	8.63485e-15	chrIV	780390	781100	711	-	TATA-less	2_mis	TFIID-dominated	TAF1-depleted	NA	TFIID
YDR163W	-1.14449	0.000308493	0.00039521	-3.66198	1.55965e-22	2.43184e-22	-2.90812	3.62048e-30	7.81041e-30	-4.19971	3.60881e-20	5.19031e-20	-0.547945	0.204537	0.254967	-1.05834	0.012442	0.0170222	-1.98619	2.78548e-11	5.26712e-11	-2.39869	1.50299e-07	2.6365e-07	chrIV	781423	781950	528	+	TATA-less	1_mis	TFIID-dominated	TAF1-enriched	NA	TFIID
YDR164C	-1.6262	1.03296e-25	3.19579e-25	-2.89365	3.52587e-73	2.73265e-72	-2.76001	3.3426e-44	3.09652e-43	-4.20601	1.21336e-50	7.37233e-50	-0.742689	0.00024033	0.00067941	-1.54605	1.13512e-14	5.72416e-14	-1.94689	3.61943e-29	2.84577e-28	-2.16652	2.00328e-14	5.31114e-14	chrIV	782041	784215	2175	-	TATA-less	2_mis	TFIID-dominated	TAF1-enriched	NA	TFIID
YDR165W	-1.67638	1.2914e-17	2.55413e-17	-2.14701	2.30434e-27	3.88627e-27	-2.63831	3.10383e-37	1.24061e-36	-3.90706	7.81446e-42	2.16068e-41	-0.585151	0.00173001	0.00377314	-0.950675	3.70791e-07	7.50185e-07	-1.51416	8.72477e-20	2.7945e-19	-1.80963	2.18495e-16	6.64656e-16	chrIV	784871	786205	1335	+	TATA-less	1_mis	TFIID-dominated	TAF1-depleted	NA	TFIID
YDR166C	-1.46745	1.85152e-20	4.23179e-20	-2.38815	5.84962e-50	1.86383e-49	-2.44619	3.92066e-28	7.48957e-28	-3.99981	2.06614e-47	8.88821e-47	-0.276998	0.143658	0.186488	-0.924504	8.75334e-07	1.70454e-06	-1.87832	1.33738e-24	6.38142e-24	-2.12011	5.04339e-16	1.48501e-15	chrIV	786306	789221	2916	-	NA	NA	TFIID-dominated	NA	NA	TFIID
YDR167W	-1.6579	1.68238e-14	2.85984e-14	-2.45001	4.63464e-27	7.77807e-27	-2.3631	8.10988e-25	1.31894e-24	-3.77706	4.95949e-34	9.36469e-34	-0.783091	0.000941669	0.00221441	-1.36273	6.53001e-09	1.59139e-08	-1.71895	1.92246e-17	5.09582e-17	-2.56161	1.09617e-19	4.38871e-19	chrIV	789449	790069	621	+	TATA-less	2_mis	TFIID-dominated	TAF1-enriched	NA	TFIID
YDR168W	-1.82343	3.40306e-35	1.79275e-34	-3.31041	1.82563e-107	7.19654e-106	-2.61861	8.86056e-37	3.37658e-36	-4.22581	1.15317e-59	2.06194e-58	-0.383983	0.00499635	0.00951934	-1.24203	2.03076e-20	2.48921e-19	-1.16315	8.29229e-15	1.8741e-14	-1.40777	2.39111e-12	5.5047e-12	chrIV	790328	791848	1521	+	TATA-less	1_mis	TFIID-dominated	TAF1-enriched	NA	TFIID
YDR169C	-1.17215	1.2846e-11	1.94935e-11	-2.45679	7.42432e-45	1.97531e-44	-2.71088	3.72313e-36	1.33464e-35	-4.40798	1.68221e-34	3.22704e-34	-0.222944	0.295301	0.352757	-1.2715	1.1875e-09	3.12448e-09	-2.18805	3.44314e-09	5.94974e-09	-3.00465	7.10241e-07	1.2063e-06	chrIV	792348	793889	1542	-	TATA-less	2_mis	TFIID-dominated	TAF1-enriched	NA	TFIID
YDR170C	-2.00466	1.39035e-53	1.94224e-52	-2.7201	4.42434e-96	1.01155e-94	-2.45606	1.42593e-30	3.15218e-30	-3.95065	5.52198e-42	1.54008e-41	-0.000826805	0.993866	0.994528	-0.101958	0.340452	0.395471	-0.324227	0.0338455	0.0428859	-0.350832	0.0620042	0.0786294	chrIV	796193	802222	6030	-	TATA-less	1_mis	TFIID-dominated	TAF1-depleted	NA	TFIID
YDR171W	-2.48403	9.27695e-52	1.17617e-50	-3.64677	1.18141e-109	5.16132e-108	-2.54778	2.2532e-39	1.13455e-38	-4.21885	2.80529e-70	1.58911e-68	-0.593675	2.2837e-05	8.77998e-05	-1.52303	2.59791e-29	1.0055e-27	-2.20745	2.42785e-38	5.8179e-37	-3.37162	1.06685e-70	3.02523e-68	chrIV	806621	807748	1128	+	TATA-containing	0_mis	SAGA-dominated	TAF1-depleted	NA	CR
YDR172W	-1.89515	2.66858e-44	2.38021e-43	-2.29359	1.66938e-63	8.73401e-63	-2.51634	5.49016e-35	1.75095e-34	-3.65058	1.5095e-52	1.12811e-51	-0.304989	0.0084359	0.0149852	-0.641018	2.68267e-08	6.0886e-08	-0.912578	6.5029e-10	1.15872e-09	-0.615923	0.00116148	0.00166597	chrIV	808324	810381	2058	+	TATA-less	2_mis	TFIID-dominated	TAF1-enriched	NA	TFIID
YDR173C	-0.52338	0.0244863	0.0299592	-1.3999	4.81466e-09	6.33124e-09	-0.643905	0.00350387	0.00414178	-2.15159	8.98474e-11	1.18804e-10	0.420797	0.183169	0.231386	-0.0300837	0.922589	0.938807	-0.331254	0.139135	0.167817	-1.32433	0.000101782	0.000154557	chrIV	810565	811632	1068	-	TATA-less	1_mis	TFIID-dominated	TAF1-enriched	NA	CR
YDR174W	-1.82117	1.88437e-31	8.05791e-31	-2.38701	2.84318e-51	9.45751e-51	-2.67205	8.76276e-41	5.26629e-40	-4.25856	6.00571e-51	3.78714e-50	-0.434666	0.000339113	0.000913979	-1.08855	1.08627e-19	1.18421e-18	-1.00871	6.46074e-08	1.06261e-07	-1.16509	1.27338e-07	2.24216e-07	chrIV	812110	812850	741	+	TATA-less	1_mis	TFIID-dominated	TAF1-enriched	NA	TFIID
YDR175C	-1.23629	4.13061e-14	6.92203e-14	-2.34725	2.00318e-44	5.25826e-44	-2.17634	3.7179e-23	5.75224e-23	-3.726	6.62297e-42	1.84105e-41	-0.569346	0.00694868	0.012646	-1.39076	2.31959e-11	7.54098e-11	-1.9789	4.63538e-28	3.17368e-27	-3.03987	5.56463e-28	5.20696e-27	chrIV	813193	814152	960	-	TATA-less	2_mis	TFIID-dominated	TAF1-enriched	NA	TFIID
YDR176W	-1.48289	2.16411e-21	5.17379e-21	-2.84409	4.11063e-70	2.85662e-69	-2.65343	1.52257e-34	4.66297e-34	-4.58995	3.79159e-57	4.81339e-56	-0.814104	3.62643e-05	0.000131916	-1.56098	1.51309e-15	8.54673e-15	-2.38182	1.09332e-40	3.47624e-39	-2.84275	3.8643e-26	2.95463e-25	chrIV	814452	816560	2109	+	TATA-less	2_mis	TFIID-dominated	TAF1-enriched	NA	TFIID
YDR177W	-1.27922	4.0793e-13	6.54807e-13	-2.01172	2.913e-29	5.12184e-29	-1.9124	4.99154e-21	7.29691e-21	-3.34594	5.22525e-34	9.85821e-34	-0.057197	0.710712	0.752246	-0.694156	4.29203e-06	7.75102e-06	-0.911297	1.16754e-08	1.98127e-08	-1.34786	1.87142e-10	3.86002e-10	chrIV	816878	817525	648	+	TATA-less	2_mis	TFIID-dominated	TAF1-enriched	NA	TFIID
YDR178W	-2.21557	2.07703e-27	7.02135e-27	-3.08863	1.60927e-46	4.51083e-46	-2.51827	4.24122e-28	8.09041e-28	-4.55077	1.23283e-39	2.97228e-39	-0.732202	0.000394505	0.00104547	-0.908294	1.04949e-05	1.83108e-05	-1.42162	5.85041e-05	8.49855e-05	-1.98063	1.07941e-05	1.73141e-05	chrIV	817950	818495	546	+	TATA-containing	0_mis	TFIID-dominated	TAF1-enriched	NA	TFIID
YDR179C	-2.23061	5.29769e-13	8.47151e-13	-2.58801	1.69718e-14	2.35743e-14	-2.50778	1.39199e-15	1.85866e-15	-3.76505	2.13986e-11	2.84457e-11	-0.857269	0.0572219	0.0820008	-1.50851	0.000945888	0.00141515	-1.67863	1.71741e-06	2.65451e-06	-1.91141	2.06178e-05	3.26065e-05	chrIV	818708	819196	489	-	NA	NA	TFIID-dominated	NA	NA	TFIID
YDR179W-A	-1.92309	1.70991e-18	3.5273e-18	-2.06099	1.68663e-19	2.51491e-19	-2.1344	3.59387e-23	5.56419e-23	-4.07334	6.17551e-33	1.12572e-32	-0.75196	0.0155369	0.0257365	-1.16867	0.000260896	0.000406604	-1.78248	4.65634e-12	9.12509e-12	-2.26859	6.41943e-11	1.36599e-10	chrIV	819433	820824	1392	+	NA	NA	TFIID-dominated	NA	NA	TFIID
YDR180W	-1.64861	6.58775e-24	1.82494e-23	-2.64663	1.58239e-57	6.66684e-57	-2.53827	4.138e-27	7.48883e-27	-4.09153	1.75318e-41	4.74436e-41	-0.354047	0.0598848	0.0855272	-1.03695	2.39747e-08	5.46406e-08	-1.27021	4.6978e-14	1.02375e-13	-1.80525	6.65025e-16	1.94149e-15	chrIV	821295	825776	4482	+	TATA-less	1_mis	TFIID-dominated	TAF1-enriched	NA	TFIID
YDR181C	-1.30608	5.37513e-12	8.26266e-12	-2.3996	8.74048e-35	1.74937e-34	-2.44994	2.69939e-24	4.31068e-24	-4.38113	2.68558e-53	2.1629e-52	-0.662187	0.0062537	0.0115454	-1.46141	1.41469e-09	3.67785e-09	-2.12532	6.92021e-27	4.17261e-26	-2.85842	2.26422e-25	1.61039e-24	chrIV	825910	827355	1446	-	NA	NA	TFIID-dominated	NA	NA	TFIID
YDR182W	-1.74168	4.80974e-27	1.59372e-26	-2.73884	2.63993e-61	1.26624e-60	-2.45747	6.43342e-33	1.71362e-32	-3.76056	1.20128e-37	2.62067e-37	-0.872647	6.55658e-06	2.9958e-05	-1.44668	2.85058e-14	1.36299e-13	-1.70716	1.04025e-18	3.05697e-18	-2.51434	1.5363e-24	9.81365e-24	chrIV	827582	829057	1476	+	NA	NA	TFIID-dominated	NA	NA	TFIID
YDR183W	-1.80031	3.04786e-12	4.73505e-12	-3.39137	4.52963e-31	8.31605e-31	-2.61167	9.50362e-21	1.37878e-20	-3.87086	5.21011e-17	7.24002e-17	-0.834961	0.0216549	0.0346397	-1.81313	3.87788e-07	7.83603e-07	-2.08166	4.17468e-08	6.92028e-08	-2.61878	8.02964e-05	0.000122702	chrIV	829585	830277	693	+	NA	NA	TFIID-dominated	NA	NA	TFIID
YDR184C	-1.69551	5.74172e-17	1.09853e-16	-1.67607	5.54604e-16	7.85793e-16	-2.71066	2.81995e-40	1.59338e-39	-3.98533	3.53821e-37	7.57898e-37	-0.654157	0.00396719	0.0077728	-0.86784	0.000179711	0.000282841	-2.32332	2.55623e-24	1.18167e-23	-2.55427	4.28487e-12	9.71695e-12	chrIV	830629	831513	885	-	TATA-less	2_mis	TFIID-dominated	TAF1-enriched	NA	TFIID
YDR185C	-0.585819	0.0792283	0.094872	-1.86462	1.98752e-07	2.57069e-07	-1.33205	8.01626e-06	9.82011e-06	-2.21328	3.83406e-06	4.87189e-06	0.00607735	0.98915	0.990963	-0.172562	0.700592	0.744891	-0.633016	0.162289	0.194412	-1.57753	0.00261099	0.00365819	chrIV	831934	832473	540	-	TATA-less	1_mis	TFIID-dominated	TAF1-enriched	NA	NA
YDR186C	-1.67964	1.51074e-25	4.62596e-25	-2.0348	2.21086e-36	4.59663e-36	-2.24633	3.66144e-28	7.01637e-28	-4.35015	7.99994e-51	4.97028e-50	-1.13287	1.7784e-10	2.64037e-09	-1.26516	4.71187e-13	1.89897e-12	-1.77547	1.7498e-25	9.04458e-25	-3.01313	1.75678e-38	5.3792e-37	chrIV	832859	835492	2634	-	TATA-less	1_mis	TFIID-dominated	TAF1-enriched	NA	TFIID
YDR188W	-2.18049	6.31245e-30	2.48691e-29	-2.88823	1.37851e-50	4.48113e-50	-2.79587	5.88051e-47	7.64353e-46	-4.21327	3.56702e-61	7.58526e-60	-1.12185	7.83474e-16	3.09936e-14	-1.53564	6.33888e-29	2.35583e-27	-1.83307	1.26056e-34	1.8589e-33	-2.04985	1.90979e-25	1.37177e-24	chrIV	836421	838061	1641	+	TATA-less	1_mis	TFIID-dominated	TAF1-enriched	NA	TFIID
YDR189W	-1.88717	3.85049e-44	3.39903e-43	-2.50939	6.59624e-74	5.29165e-73	-2.62159	3.02894e-39	1.50817e-38	-4.16288	1.62073e-51	1.0871e-50	-0.36859	0.013395	0.0225628	-0.988662	2.43036e-11	7.88149e-11	-1.42738	1.01468e-17	2.76145e-17	-1.49156	6.41905e-11	1.36599e-10	chrIV	838392	840392	2001	+	TATA-less	2_mis	TFIID-dominated	TAF1-enriched	NA	TFIID
YDR190C	-1.67515	1.14711e-26	3.7201e-26	-2.14965	5.49425e-42	1.34206e-41	-2.31803	2.40286e-27	4.40568e-27	-3.4935	3.53931e-42	1.00372e-41	-0.353719	0.00555956	0.0104305	-0.7553	2.05937e-09	5.28455e-09	-1.36477	1.03626e-19	3.29801e-19	-1.32928	4.68592e-11	1.00664e-10	chrIV	840604	841995	1392	-	TATA-less	2_mis	TFIID-dominated	TAF1-enriched	NA	TFIID
YDR191W	-1.55067	4.99415e-12	7.68563e-12	-2.80941	4.48054e-32	8.41742e-32	-2.7261	3.13318e-28	6.02128e-28	-3.99616	2.12751e-26	3.32982e-26	-0.636105	0.0643905	0.0912784	-1.68124	1.06615e-06	2.05713e-06	-2.83585	2.07531e-11	3.94485e-11	-3.00055	0.000258947	0.0003862	chrIV	842337	843449	1113	+	TATA-less	2_mis	TFIID-dominated	TAF1-enriched	NA	TFIID
YDR192C	-1.33058	2.96025e-12	4.60103e-12	-1.83759	8.73849e-21	1.32487e-20	-2.64326	6.55818e-31	1.484e-30	-3.66532	5.70413e-20	8.18117e-20	-0.383568	0.145336	0.188382	-1.45691	4.13914e-08	9.18701e-08	-1.78908	0.000174451	0.00024735	-2.29836	0.00652643	0.0089536	chrIV	843569	844861	1293	-	TATA-less	2_mis	TFIID-dominated	TAF1-enriched	NA	TFIID
YDR194C	-1.49181	2.89628e-21	6.87866e-21	-1.90166	2.086e-33	4.0475e-33	-1.80528	3.22352e-18	4.45592e-18	-3.90342	1.70965e-58	2.65547e-57	-0.644689	1.83806e-06	9.72052e-06	-1.19424	4.7575e-19	4.59657e-18	-1.51433	1.14444e-24	5.53781e-24	-2.83594	2.84689e-41	1.15326e-39	chrIV	845952	847946	1995	-	TATA-containing	0_mis	TFIID-dominated	TAF1-enriched	NA	TFIID
YDR195W	-0.435482	0.0190611	0.0234008	-1.24097	5.65967e-11	7.58937e-11	-0.795143	0.000140625	0.000169605	-2.1945	8.44712e-15	1.15151e-14	0.0160157	0.944306	0.953503	-0.254565	0.266223	0.316094	-0.49115	0.0229779	0.0294128	-1.27276	3.37759e-05	5.26372e-05	chrIV	848599	850200	1602	+	TATA-containing	0_mis	TFIID-dominated	TAF1-enriched	NA	CR
YDR196C	-2.00169	1.42006e-25	4.35608e-25	-3.08089	2.28681e-50	7.38129e-50	-2.60332	1.25167e-27	2.32935e-27	-4.38373	8.92505e-37	1.87193e-36	-0.650756	0.00294713	0.00598685	-1.19783	2.22328e-08	5.08833e-08	-1.20081	2.75832e-12	5.46633e-12	-0.929867	4.05643e-05	6.29306e-05	chrIV	850274	850999	726	-	TATA-less	2_mis	TFIID-dominated	TAF1-depleted	NA	TFIID
YDR197W	-1.34219	1.99959e-13	3.24313e-13	-2.15267	5.37634e-30	9.62576e-30	-2.38061	1.54646e-27	2.86442e-27	-3.81982	8.79979e-33	1.59718e-32	-0.679532	0.0108355	0.0187385	-1.32931	1.29253e-06	2.47133e-06	-2.02102	7.01036e-14	1.51303e-13	-3.46317	3.54248e-12	8.07553e-12	chrIV	851228	852397	1170	+	TATA-less	1_mis	TFIID-dominated	TAF1-enriched	NA	TFIID
YDR198C	-1.24816	2.58467e-09	3.6621e-09	-2.15597	2.5113e-23	3.9625e-23	-2.39072	2.18514e-27	4.01636e-27	-3.81175	5.24501e-36	1.06592e-35	-0.156193	0.547299	0.602289	-1.01965	9.924e-05	0.000159491	-1.73154	1.87628e-13	3.95013e-13	-1.6318	1.50128e-08	2.76826e-08	chrIV	852533	853972	1440	-	TATA-less	1_mis	TFIID-dominated	TAF1-enriched	NA	TFIID
YDR200C	-1.66394	3.55132e-20	7.98901e-20	-3.80609	1.07455e-85	1.48896e-84	-2.70564	8.28687e-35	2.58994e-34	-4.19197	2.26834e-50	1.33545e-49	-0.62861	0.0053635	0.0101196	-1.62323	6.62744e-13	2.62728e-12	-1.91433	1.82364e-23	7.77404e-23	-2.3813	1.08288e-19	4.34082e-19	chrIV	854279	856093	1815	-	TATA-less	1_mis	TFIID-dominated	TAF1-enriched	NA	TFIID
YDR201W	-2.26417	1.07673e-14	1.84724e-14	-3.56165	2.29062e-28	3.95951e-28	-3.02595	1.28206e-36	4.80646e-36	-4.19328	7.51278e-25	1.14604e-24	-1.47725	7.93553e-05	0.000262611	-1.97214	5.01394e-08	1.10276e-07	-2.36213	3.43594e-20	1.13337e-19	-3.47069	2.18603e-20	9.25798e-20	chrIV	856317	856814	498	+	NA	NA	TFIID-dominated	NA	NA	TFIID
YDR202C	-2.06301	7.9278e-25	2.3002e-24	-3.43047	6.64193e-58	2.83491e-57	-2.74538	3.37748e-34	1.00589e-33	-4.73505	4.69091e-40	1.15999e-39	-1.07531	9.31629e-05	0.000301826	-2.08945	2.26227e-14	1.09611e-13	-2.18859	9.55754e-21	3.2926e-20	-2.9803	1.92605e-15	5.44505e-15	chrIV	856898	857953	1056	-	NA	NA	TFIID-dominated	NA	NA	TFIID
YDR204W	-2.44	3.21564e-32	1.43036e-31	-3.43579	2.18681e-56	8.69528e-56	-2.85592	2.05346e-42	1.46986e-41	-4.46175	1.85017e-42	5.33218e-42	-0.649205	0.00843206	0.0149828	-1.74394	3.38467e-13	1.3924e-12	-1.77958	2.71498e-20	9.02409e-20	-2.17854	3.42435e-20	1.42525e-19	chrIV	858137	859144	1008	+	NA	NA	TFIID-dominated	NA	NA	TFIID
YDR205W	-1.14041	1.35111e-10	1.98656e-10	-2.64867	2.19066e-47	6.32928e-47	-2.44307	3.07842e-31	7.13687e-31	-3.81924	5.40649e-30	9.12041e-30	-0.489866	0.0344472	0.0523852	-1.34442	4.09336e-09	1.01573e-08	-1.80901	1.21771e-12	2.45806e-12	-2.28771	2.06536e-10	4.25065e-10	chrIV	859346	861520	2175	+	TATA-less	1_mis	TFIID-dominated	TAF1-enriched	NA	TFIID
YDR206W	-1.35574	2.32406e-18	4.75558e-18	-1.7918	2.29741e-30	4.15558e-30	-2.10884	2.172e-22	3.28468e-22	-3.28841	1.3832e-37	3.00974e-37	-0.462501	0.00439991	0.00851793	-0.862599	9.45741e-08	2.02424e-07	-1.481	6.67075e-19	1.99449e-18	-1.42266	2.86059e-12	6.55543e-12	chrIV	862054	864708	2655	+	TATA-less	2_mis	TFIID-dominated	TAF1-enriched	NA	TFIID
YDR207C	-2.21163	4.30243e-38	2.6658e-37	-3.29866	2.43694e-76	2.1402e-75	-3.45526	2.30192e-40	1.31844e-39	-5.24454	1.41325e-53	1.17759e-52	-1.13174	2.16807e-06	1.12871e-05	-1.7486	7.7724e-14	3.511e-13	-2.82273	8.83598e-15	1.99283e-14	-3.35243	3.68807e-10	7.491e-10	chrIV	865012	867522	2511	-	TATA-less	2_mis	TFIID-dominated	TAF1-enriched	NA	TFIID
YDR208W	-1.85313	4.26138e-35	2.23462e-34	-2.38639	4.62421e-56	1.81346e-55	-2.60697	8.95121e-31	2.0032e-30	-4.14586	2.11603e-47	9.08546e-47	-1.04305	7.04818e-12	1.35402e-10	-1.59743	7.77209e-26	2.00147e-24	-2.32089	1.40424e-38	3.48016e-37	-3.45037	3.53693e-43	1.70873e-41	chrIV	868224	870563	2340	+	TATA-less	1_mis	TFIID-dominated	TAF1-enriched	NA	TFIID
YDR211W	-1.48188	5.69991e-25	1.67219e-24	-2.01994	2.92694e-44	7.6567e-44	-2.00056	1.0943e-19	1.55235e-19	-3.56542	2.89444e-46	1.13571e-45	-0.144806	0.269895	0.325945	-0.419857	0.00129659	0.00192008	-0.846764	8.13506e-09	1.38807e-08	-0.889612	3.43908e-05	5.35698e-05	chrIV	884727	886865	2139	+	TATA-containing	0_mis	TFIID-dominated	TAF1-depleted	NA	TFIID
YDR212W	-1.81879	4.58577e-40	3.2063e-39	-2.57987	5.15527e-78	4.9043e-77	-2.52194	2.9492e-37	1.18587e-36	-3.80406	1.12247e-49	6.06296e-49	-0.481395	3.15556e-05	0.000116982	-1.10423	3.73425e-22	5.92858e-21	-1.12651	2.35937e-13	4.94004e-13	-1.17293	1.37983e-08	2.55153e-08	chrIV	887232	888911	1680	+	TATA-less	2_mis	TFIID-dominated	TAF1-enriched	NA	TFIID
YDR213W	-1.38033	3.11314e-15	5.47794e-15	-1.4617	7.36672e-16	1.04182e-15	-1.91895	7.16662e-18	9.86182e-18	-3.03972	1.16962e-26	1.83915e-26	-0.300283	0.148852	0.192276	-0.198463	0.352928	0.408177	-1.17149	1.83677e-09	3.21397e-09	-1.21674	7.11453e-07	1.20804e-06	chrIV	889751	892492	2742	+	NA	NA	TFIID-dominated	NA	NA	TFIID
YDR214W	-2.70572	1.65284e-86	9.6896e-85	-2.77143	2.54672e-90	4.4561e-89	-2.43687	3.74856e-36	1.34232e-35	-4.14641	4.09689e-62	9.58929e-61	-1.06019	1.36622e-15	5.23253e-14	-0.960916	7.58732e-14	3.43451e-13	-1.4544	7.21066e-19	2.14608e-18	-2.32883	6.89134e-30	7.87134e-29	chrIV	892875	893927	1053	+	TATA-less	2_mis	TFIID-dominated	TAF1-depleted	NA	CR
YDR216W	-1.89757	1.23113e-32	5.58859e-32	-3.19926	1.57333e-88	2.50965e-87	-2.75874	3.00453e-37	1.20523e-36	-3.86026	3.58074e-54	3.22698e-53	-0.560741	0.000261784	0.000730783	-1.60846	5.95224e-27	1.69276e-25	-2.30306	2.88906e-29	2.31054e-28	-2.24085	1.91407e-17	6.36269e-17	chrIV	895035	899006	3972	+	NA	NA	TFIID-dominated	NA	NA	TFIID
YDR217C	-1.21646	8.96243e-18	1.79014e-17	-2.44227	1.80542e-63	9.41704e-63	-2.52784	6.78842e-30	1.44082e-29	-4.14272	2.90824e-46	1.14046e-45	-0.341566	0.051283	0.0744662	-0.916512	1.71874e-07	3.58491e-07	-1.54821	2.34306e-24	1.08698e-23	-1.52994	1.01177e-12	2.39258e-12	chrIV	899551	903480	3930	-	NA	NA	TFIID-dominated	NA	NA	TFIID
YDR218C	0.430203	0.53042	0.580247	0.286527	0.699495	0.726615	0.770498	0.116878	0.132685	1.43689	0.0513128	0.0602823	0.650178	0.2761	0.332837	0.368999	0.532588	0.589551	1.78718	0.0101272	0.0132203	1.68496	0.0370801	0.0480927	chrIV	903781	905052	1272	-	NA	NA	TFIID-dominated	NA	NA	NA
YDR219C	-1.77959	7.3356e-21	1.71023e-20	-2.41383	7.43953e-36	1.52823e-35	-2.33697	5.54056e-23	8.51915e-23	-3.71077	7.48833e-44	2.37324e-43	-0.91214	7.37243e-05	0.000245326	-1.66903	1.44101e-13	6.23803e-13	-2.12954	2.64226e-26	1.50808e-25	-2.96418	1.65345e-23	9.4761e-23	chrIV	905455	906852	1398	-	TATA-less	1_mis	TFIID-dominated	TAF1-enriched	NA	TFIID
YDR221W	-2.20943	1.284e-37	7.77313e-37	-3.31541	6.20393e-78	5.88558e-77	-2.8949	1.2944e-40	7.64222e-40	-4.35396	3.98602e-55	4.08355e-54	-1.34075	3.36342e-12	6.85567e-11	-1.76842	2.11811e-21	3.01186e-20	-2.1845	5.11712e-34	7.00702e-33	-2.44064	6.89348e-29	7.04691e-28	chrIV	907330	909438	2109	+	TATA-less	2_mis	TFIID-dominated	TAF1-enriched	NA	TFIID
YDR223W	0.362511	0.262438	0.301468	-2.62645	2.23173e-11	3.00794e-11	-0.155625	0.524564	0.564547	-2.49382	1.53389e-06	1.95759e-06	0.616747	0.182081	0.230156	-0.515183	0.299444	0.35133	0.251239	0.335944	0.387348	-0.868233	0.152355	0.184833	chrIV	912099	913502	1404	+	NA	NA	TFIID-dominated	NA	NA	NA
YDR224C	-2.45201	6.03867e-56	9.42167e-55	-2.80398	1.02058e-71	7.51093e-71	-2.73928	2.89989e-38	1.30097e-37	-4.6071	7.70108e-40	1.88295e-39	-1.19724	4.63539e-14	1.26694e-12	-1.62608	6.12316e-25	1.44591e-23	-2.22009	1.9557e-12	3.90661e-12	-3.00451	1.07673e-05	1.72753e-05	chrIV	914317	914712	396	-	TATA-containing	0_mis	TFIID-dominated	TAF1-depleted	NA	CR
YDR225W	-2.45881	4.43666e-53	6.06197e-52	-2.47073	5.19076e-53	1.84092e-52	-1.79209	7.9264e-20	1.1268e-19	-4.71295	2.25309e-76	2.86567e-74	-1.27798	2.15724e-20	1.7529e-18	-1.51905	1.71934e-28	6.11206e-27	-1.39976	1.37209e-20	4.65312e-20	-3.24368	1.28886e-58	1.86798e-56	chrIV	915530	915928	399	+	TATA-containing	0_mis	TFIID-dominated	TAF1-depleted	NA	CR
YDR226W	-2.60333	7.74189e-59	1.37926e-57	-2.32659	1.15811e-46	3.25953e-46	-2.22977	3.71901e-32	9.32464e-32	-4.45987	4.89646e-64	1.44768e-62	-0.316301	0.00338258	0.00678209	-0.466264	1.28242e-05	2.21679e-05	-0.241552	0.111675	0.136056	-0.397394	0.0279191	0.0365053	chrIV	916486	917154	669	+	TATA-containing	0_mis	TFIID-dominated	TAF1-depleted	NA	CR
YDR227W	-1.51581	5.62076e-22	1.38929e-21	-2.67208	5.90665e-63	3.02793e-62	-2.51235	5.57743e-29	1.11932e-28	-3.65193	2.25309e-39	5.35735e-39	-0.150597	0.357194	0.416565	-0.922409	1.3221e-08	3.11522e-08	-2.00304	1.87316e-20	6.29992e-20	-2.3659	2.04375e-15	5.77027e-15	chrIV	917571	921647	4077	+	TATA-less	1_mis	TFIID-dominated	TAF1-enriched	NA	TFIID
YDR228C	-1.0961	5.56594e-10	8.04569e-10	-1.4691	2.51156e-16	3.57328e-16	-1.34389	1.02511e-10	1.31036e-10	-2.58057	2.53591e-20	3.65502e-20	-0.213138	0.347171	0.406531	-0.84528	0.00019204	0.000301593	-1.06083	9.27897e-07	1.44379e-06	-1.36326	1.521e-05	2.42009e-05	chrIV	921926	923806	1881	-	TATA-less	2_mis	TFIID-dominated	TAF1-depleted	NA	TFIID
YDR229W	-1.39828	2.08981e-16	3.8793e-16	-3.11616	3.05297e-66	1.80832e-65	-2.70682	6.16274e-35	1.95708e-34	-4.31606	2.52489e-50	1.48132e-49	-0.55011	0.0156701	0.0259142	-1.46793	4.93701e-11	1.54882e-10	-2.26313	1.60496e-29	1.32587e-28	-3.53268	1.37508e-25	9.99807e-25	chrIV	924785	926146	1362	+	NA	NA	TFIID-dominated	NA	NA	TFIID
YDR231C	-1.96773	2.05373e-22	5.21145e-22	-3.09456	5.19435e-47	1.4808e-46	-2.82267	3.58836e-34	1.06351e-33	-4.31516	8.6928e-35	1.68337e-34	-0.769365	0.00637703	0.0117587	-2.07727	6.68812e-14	3.04645e-13	-2.28549	7.20287e-20	2.32187e-19	-3.61896	4.16781e-29	4.36315e-28	chrIV	926293	926910	618	-	TATA-less	1_mis	TFIID-dominated	TAF1-enriched	NA	TFIID
YDR232W	-2.52581	2.19181e-51	2.73837e-50	-2.12435	1.76071e-36	3.66851e-36	-2.75672	1.28378e-41	8.542e-41	-4.11913	1.44043e-46	5.82482e-46	-1.30337	1.64185e-19	1.16146e-17	-1.15089	8.08248e-16	4.74148e-15	-1.89032	1.33214e-19	4.18857e-19	-2.43564	4.5891e-15	1.26287e-14	chrIV	927452	929098	1647	+	TATA-less	1_mis	TFIID-dominated	TAF1-enriched	NA	TFIID
YDR233C	-2.77719	2.37611e-56	3.76391e-55	-3.03279	5.82729e-65	3.26014e-64	-2.98046	7.00036e-44	6.14547e-43	-4.32725	9.02472e-36	1.81005e-35	-0.86168	1.31418e-08	1.26032e-07	-1.36535	1.37528e-19	1.47956e-18	-1.56104	4.35171e-08	7.20641e-08	-2.15824	6.59877e-06	1.06607e-05	chrIV	929470	930357	888	-	TATA-containing	0_mis	TFIID-dominated	TAF1-enriched	NA	TFIID
YDR234W	-2.62748	4.82115e-58	8.24645e-57	-2.65438	1.37992e-56	5.54475e-56	-3.00793	2.34973e-51	5.45317e-50	-3.74111	3.01816e-43	9.18115e-43	-0.993043	4.78263e-09	5.18161e-08	-0.722461	1.42549e-05	2.45566e-05	-1.353	2.66861e-15	6.2055e-15	-0.695816	0.000362986	0.000535367	chrIV	931129	933210	2082	+	TATA-containing	0_mis	TFIID-dominated	TAF1-depleted	NA	TFIID
YDR235W	-1.49176	7.82047e-15	1.35047e-14	-2.66231	8.72082e-42	2.11439e-41	-2.4558	1.19214e-29	2.48236e-29	-3.95244	8.15316e-47	3.35125e-46	-0.618302	0.0101637	0.0176682	-1.65043	1.43009e-11	4.77498e-11	-2.03002	1.18411e-24	5.70863e-24	-3.02388	1.94883e-21	9.1771e-21	chrIV	933504	935138	1635	+	TATA-less	1_mis	TFIID-dominated	TAF1-depleted	NA	TFIID
YDR236C	-1.98257	4.67111e-23	1.23751e-22	-3.11103	3.34978e-47	9.6215e-47	-2.79641	1.94583e-41	1.26583e-40	-3.75106	1.3384e-32	2.41364e-32	-0.472867	0.0634239	0.0901154	-1.16761	2.56697e-06	4.75598e-06	-1.75706	7.19017e-17	1.83931e-16	-1.4516	9.34096e-07	1.5791e-06	chrIV	935236	935892	657	-	TATA-less	2_mis	TFIID-dominated	TAF1-enriched	NA	TFIID
YDR237W	-1.65507	1.62769e-25	4.97077e-25	-2.76999	2.13571e-64	1.17191e-63	-2.65425	3.2417e-40	1.81694e-39	-4.44718	1.10524e-58	1.77814e-57	-0.829546	2.81776e-05	0.000105763	-2.19642	2.81886e-27	8.57589e-26	-2.47332	1.34799e-43	6.55688e-42	-3.90717	6.27324e-52	5.38343e-50	chrIV	936615	937493	879	+	TATA-less	2_mis	TFIID-dominated	TAF1-enriched	NA	TFIID
YDR238C	-1.94366	1.13616e-48	1.25895e-47	-2.32605	1.79991e-68	1.17353e-67	-2.32726	2.26005e-32	5.79662e-32	-3.66633	1.10037e-50	6.72492e-50	-0.0126475	0.908524	0.922485	-0.409217	0.000183383	0.000288413	-0.515239	0.000725077	0.00100022	-0.462983	0.0131892	0.0177251	chrIV	937895	940816	2922	-	TATA-less	2_mis	TFIID-dominated	TAF1-enriched	NA	TFIID
YDR239C	-1.77924	3.99754e-21	9.43535e-21	-2.29134	1.43469e-31	2.66247e-31	-2.08812	7.97512e-19	1.11181e-18	-3.66192	8.36781e-28	1.3456e-27	-0.864297	0.000218902	0.000629188	-1.1444	1.24037e-06	2.37369e-06	-1.54167	1.56936e-08	2.64728e-08	-2.4579	9.1397e-09	1.70996e-08	chrIV	941057	943420	2364	-	TATA-less	2_mis	TFIID-dominated	TAF1-enriched	NA	TFIID
YDR240C	-1.63586	2.15478e-18	4.41578e-18	-2.30532	2.23688e-32	4.21853e-32	-2.68773	8.10414e-42	5.47928e-41	-4.46588	7.43203e-48	3.33551e-47	-0.973621	0.00143121	0.00319327	-1.42496	2.64411e-06	4.88298e-06	-2.31053	2.32284e-29	1.88546e-28	-3.34733	2.76735e-25	1.947e-24	chrIV	943674	945152	1479	-	NA	NA	TFIID-dominated	NA	NA	TFIID
YDR242W	-2.61773	3.53813e-25	1.04829e-24	-3.60886	1.92283e-42	4.75955e-42	-2.99513	1.14437e-41	7.64469e-41	-5.08538	5.75998e-49	2.90847e-48	-1.21637	0.000565059	0.00142402	-1.99109	4.18049e-09	1.03617e-08	-2.64373	2.55705e-29	2.06018e-28	-3.45375	2.48175e-19	9.64026e-19	chrIV	946807	948456	1650	+	NA	NA	SAGA/TFIID-dominated	NA	NA	TFIID
YDR243C	-1.7243	2.68501e-24	7.5788e-24	-2.29394	4.93805e-38	1.07388e-37	-2.83665	1.97625e-39	1.00263e-38	-4.08945	2.30335e-47	9.87087e-47	-1.06922	5.6278e-05	0.000193814	-1.04676	7.44395e-05	0.000120701	-2.83846	1.12415e-37	2.4838e-36	-3.36732	1.38153e-23	7.95265e-23	chrIV	948518	950284	1767	-	TATA-less	3_mis	TFIID-dominated	TAF1-enriched	NA	TFIID
YDR244W	-1.41153	2.02205e-17	3.96151e-17	-2.49977	1.86775e-49	5.8258e-49	-2.3116	6.4964e-26	1.1118e-25	-3.6544	4.02549e-41	1.0629e-40	-0.570354	0.00608792	0.0112844	-1.37626	1.83706e-11	6.0383e-11	-2.01165	1.65789e-27	1.07524e-26	-2.95709	1.62341e-30	2.01673e-29	chrIV	950563	952401	1839	+	TATA-containing	0_mis	TFIID-dominated	TAF1-enriched	NA	TFIID
YDR245W	-2.04386	3.67065e-41	2.72773e-40	-2.40662	5.14924e-55	1.93952e-54	-2.4455	3.69548e-35	1.19449e-34	-3.87406	1.83285e-54	1.70417e-53	-0.999727	1.71673e-09	2.03203e-08	-1.5005	7.76004e-20	8.67665e-19	-1.98869	2.20306e-29	1.79719e-28	-2.72871	7.77255e-37	2.01962e-35	chrIV	952800	953981	1182	+	TATA-less	1_mis	TFIID-dominated	TAF1-enriched	NA	TFIID
YDR246W	-1.56886	2.4416e-12	3.81306e-12	-2.80753	4.01646e-33	7.73628e-33	-2.78562	4.31877e-28	8.23365e-28	-3.92854	2.08525e-18	2.92482e-18	-1.34001	1.59627e-05	6.44619e-05	-1.96307	5.18011e-11	1.62198e-10	-2.25166	4.09532e-08	6.79046e-08	-2.52593	0.000503078	0.000736989	chrIV	954288	954947	660	+	TATA-less	1_mis	TFIID-dominated	TAF1-enriched	NA	TFIID
YDR247W	-2.40783	9.58995e-30	3.74587e-29	-3.52093	3.38868e-57	1.40187e-56	-3.42623	6.18908e-32	1.52723e-31	-4.27428	1.18538e-27	1.89892e-27	-1.59486	5.21791e-07	3.25407e-06	-2.15432	1.04418e-12	4.01763e-12	-2.60191	9.14569e-06	1.36849e-05	-2.35359	0.018685	0.0247942	chrIV	956013	957398	1386	+	TATA-less	1_mis	SAGA-dominated	TAF1-depleted	NA	CR
YDR251W	-1.78056	3.19409e-32	1.42169e-31	-3.13756	7.12178e-94	1.48025e-92	-2.90605	2.59231e-43	2.0973e-42	-4.38136	6.81779e-56	7.53984e-55	-0.754168	6.15931e-06	2.84236e-05	-2.04395	4.56898e-35	3.24845e-33	-2.28843	3.03869e-33	3.75117e-32	-3.26069	1.1239e-42	5.16204e-41	chrIV	960614	963106	2493	+	TATA-less	1_mis	TFIID-dominated	TAF1-enriched	NA	TFIID
YDR252W	-2.26588	4.11165e-14	6.89194e-14	-3.50521	2.40141e-26	3.96898e-26	-2.85424	2.85557e-26	4.96173e-26	-3.95334	2.20805e-21	3.21966e-21	-1.08736	0.0159745	0.0263741	-1.27775	0.00447546	0.00635148	-2.48387	2.1862e-10	3.97369e-10	-3.16937	4.76455e-11	1.02286e-10	chrIV	963412	963861	450	+	TATA-less	1_mis	TFIID-dominated	TAF1-enriched	NA	TFIID
YDR253C	-0.221669	0.48935	0.538386	-4.68786	3.64313e-39	8.19285e-39	-1.80686	8.59492e-14	1.12788e-13	-3.25866	8.40684e-15	1.14625e-14	0.431265	0.299066	0.356591	-2.05439	2.58327e-07	5.2936e-07	-1.66261	6.75547e-07	1.05923e-06	-2.81815	3.23365e-07	5.56755e-07	chrIV	963990	964565	576	-	TATA-less	2_mis	TFIID-dominated	TAF1-enriched	NA	TFIID
YDR254W	-1.40147	7.35499e-12	1.12582e-11	-3.18654	1.13566e-48	3.42999e-48	-2.11596	7.8319e-21	1.1392e-20	-3.6418	7.98267e-31	1.37238e-30	-0.632842	0.0454308	0.0669548	-1.78705	9.17325e-09	2.19547e-08	-1.96172	1.23702e-13	2.63149e-13	-2.97343	3.78318e-13	9.16565e-13	chrIV	965113	966489	1377	+	TATA-less	2_mis	TFIID-dominated	TAF1-enriched	NA	TFIID
YDR255C	-1.18299	1.43537e-08	1.99943e-08	-3.3801	1.0583e-51	3.56177e-51	-2.70896	3.8213e-36	1.36618e-35	-3.95703	3.62066e-35	7.11778e-35	-0.141924	0.64514	0.692349	-1.23293	3.78096e-05	6.28654e-05	-2.10386	3.62113e-16	8.87314e-16	-2.15962	8.08339e-11	1.70725e-10	chrIV	966557	967822	1266	-	TATA-less	2_mis	SAGA-dominated	TAF1-enriched	NA	TFIID
YDR256C	-1.16348	5.66825e-05	7.36615e-05	-1.02642	0.000702941	0.000870302	-0.732319	0.00401359	0.00474012	-0.886819	0.0126392	0.015163	0.597079	0.161932	0.207523	1.07955	0.00862103	0.0119521	-0.313029	0.408608	0.465263	0.474274	0.180917	0.21734	chrIV	968133	969680	1548	-	NA	NA	TFIID-dominated	NA	NA	NA
YDR257C	-1.46866	1.76064e-20	4.03212e-20	-2.42383	2.88174e-51	9.58112e-51	-2.21423	4.0097e-23	6.19655e-23	-3.24712	2.61993e-35	5.17614e-35	-0.667991	0.000324263	0.000878681	-1.01807	1.68191e-08	3.8998e-08	-2.09444	8.87002e-31	8.46483e-30	-1.92946	1.9265e-17	6.40073e-17	chrIV	969990	971474	1485	-	TATA-less	1_mis	TFIID-dominated	TAF1-enriched	NA	TFIID
YDR258C	-2.20553	7.01532e-42	5.47419e-41	-3.31901	6.28552e-93	1.27175e-91	-2.38993	9.14677e-32	2.21791e-31	-4.17315	9.09657e-62	2.06465e-60	-0.796761	1.11635e-08	1.10223e-07	-1.25178	7.89958e-21	1.03136e-19	-1.96112	2.22199e-41	7.78654e-40	-3.26663	2.83204e-57	3.92991e-55	chrIV	971808	974243	2436	-	TATA-containing	0_mis	SAGA-dominated	TAF1-depleted	NA	TFIID
YDR259C	-0.123561	0.605326	0.651386	-2.32538	7.62237e-20	1.14177e-19	-1.59028	3.3674e-08	4.23022e-08	-2.96543	7.26517e-05	9.07608e-05	0.149835	0.69426	0.737429	-0.524414	0.182741	0.222507	-1.21921	0.0317404	0.0402732	-0.970641	0.303812	0.355611	chrIV	974631	975782	1152	-	NA	NA	TFIID-dominated	NA	NA	NA
YDR260C	-2.64809	1.33103e-31	5.73104e-31	-3.29009	7.61424e-41	1.80041e-40	-3.54769	2.37437e-40	1.35531e-39	-4.69284	1.3425e-33	2.49443e-33	-1.64878	1.50873e-06	8.17407e-06	-2.31772	2.38766e-11	7.74688e-11	-3.13772	6.92366e-18	1.90335e-17	-3.59375	1.36371e-14	3.65262e-14	chrIV	976717	977229	513	-	TATA-less	1_mis	TFIID-dominated	TAF1-enriched	NA	TFIID
YDR261C	-2.5204	8.8641e-43	7.30755e-42	-2.72686	1.16956e-46	3.29039e-46	-2.46572	6.29296e-35	1.99654e-34	-3.98859	1.41262e-38	3.20299e-38	-0.558242	0.00135554	0.00304251	-0.787438	4.08652e-06	7.41056e-06	-0.61513	0.00300791	0.00402661	-0.655628	0.00721221	0.00985916	chrIV	977521	979209	1689	-	TATA-containing	0_mis	SAGA/TFIID-dominated	TAF1-enriched	NA	TFIID
YDR263C	-0.542374	0.0224259	0.027453	-0.464462	0.0618376	0.071962	-0.17384	0.455619	0.493673	-0.657071	0.0505231	0.0593959	0.250207	0.479449	0.537559	0.747115	0.0346539	0.0457645	0.174387	0.554153	0.61266	0.865404	0.0200655	0.0265666	chrIV	994242	995534	1293	-	NA	NA	SAGA/TFIID-dominated	NA	NA	NA
YDR264C	-1.71834	1.69683e-29	6.50924e-29	-1.99933	7.2243e-39	1.60889e-38	-2.01648	3.1105e-23	4.82919e-23	-3.13329	9.28066e-33	1.6822e-32	-0.868265	4.19931e-10	5.73874e-09	-1.15125	1.90935e-17	1.4539e-16	-1.63711	5.08624e-25	2.5307e-24	-1.84739	8.76843e-21	3.86665e-20	chrIV	996029	998323	2295	-	TATA-less	1_mis	TFIID-dominated	TAF1-enriched	NA	TFIID
YDR265W	-1.90632	1.05763e-21	2.57519e-21	-3.00726	9.6134e-47	2.71805e-46	-3.09057	2.66191e-47	3.63787e-46	-3.81207	2.10641e-34	4.02704e-34	-1.25833	0.000239133	0.000677193	-2.05334	5.22477e-10	1.43714e-09	-2.58378	8.11275e-27	4.83354e-26	-2.72176	2.12999e-16	6.48846e-16	chrIV	998864	999877	1014	+	TATA-less	2_mis	TFIID-dominated	TAF1-enriched	NA	TFIID
YDR266C	-1.40942	3.72334e-19	7.94104e-19	-1.75387	1.88052e-28	3.25719e-28	-2.00619	3.23149e-20	4.63012e-20	-3.00709	4.2105e-28	6.79832e-28	-0.712579	1.69213e-05	6.77415e-05	-0.981052	1.60108e-09	4.14266e-09	-1.66308	1.46232e-19	4.58241e-19	-1.73197	6.19829e-11	1.32195e-10	chrIV	1000104	1002023	1920	-	TATA-less	1_mis	TFIID-dominated	TAF1-depleted	NA	TFIID
YDR267C	-1.70176	4.93069e-10	7.14247e-10	-3.31404	1.26244e-30	2.29744e-30	-2.49748	1.34418e-31	3.2198e-31	-3.64612	2.4657e-35	4.8757e-35	-1.12826	1.67919e-05	6.72774e-05	-1.2081	2.0864e-06	3.89918e-06	-2.22876	4.91303e-30	4.26975e-29	-2.90763	1.20732e-27	1.07717e-26	chrIV	1002510	1003502	993	-	TATA-less	1_mis	TFIID-dominated	TAF1-enriched	NA	TFIID
YDR268W	-2.28062	3.50828e-31	1.47718e-30	-3.25157	4.02773e-55	1.5221e-54	-2.77537	1.78471e-39	9.10963e-39	-4.25373	1.43833e-44	4.83098e-44	-1.19831	4.2562e-06	2.0474e-05	-2.40467	2.74111e-20	3.30195e-19	-2.71223	1.4905e-35	2.52217e-34	-3.43372	9.17316e-30	1.02444e-28	chrIV	1004004	1005143	1140	+	TATA-less	1_mis	TFIID-dominated	TAF1-enriched	NA	TFIID
YDR270W	-1.88097	2.26963e-20	5.17018e-20	-3.08043	2.4593e-50	7.93059e-50	-2.40285	1.26709e-26	2.23583e-26	-4.27414	4.10266e-54	3.66791e-53	-1.11321	1.11952e-06	6.27957e-06	-1.87831	2.60411e-17	1.93342e-16	-2.04725	1.38297e-26	8.08448e-26	-3.1876	2.95999e-30	3.51001e-29	chrIV	1005675	1008689	3015	+	TATA-less	1_mis	TFIID-dominated	TAF1-depleted	NA	CR
YDR272W	-2.08957	1.61686e-25	4.93987e-25	-3.36136	7.77571e-58	3.31059e-57	-2.59888	4.35416e-37	1.7108e-36	-4.00787	1.09689e-43	3.42322e-43	-1.24436	2.91713e-08	2.57573e-07	-1.53977	7.1137e-13	2.80813e-12	-1.86575	2.02157e-27	1.29691e-26	-2.19615	3.43688e-24	2.10078e-23	chrIV	1009010	1009834	825	+	TATA-less	1_mis	TFIID-dominated	TAF1-enriched	NA	TFIID
YDR273W	-1.07162	0.00535855	0.00668625	-2.27968	8.06123e-08	1.0468e-07	-0.865735	0.00091185	0.00108764	-1.92416	0.000173176	0.000215583	0.225815	0.649683	0.69685	0.350987	0.471032	0.527211	-0.264224	0.496227	0.554978	-0.809253	0.126867	0.155561	chrIV	1010176	1011273	1098	+	NA	NA	TFIID-dominated	NA	NA	NA
YDR275W	-2.5676	4.00881e-31	1.6838e-30	-3.79121	6.26759e-49	1.9081e-48	-2.75258	6.71067e-36	2.33205e-35	-4.80593	5.14152e-36	1.04552e-35	-1.6659	5.88772e-07	3.60151e-06	-2.00293	3.51638e-09	8.79567e-09	-2.26448	1.29221e-16	3.26205e-16	-2.66562	8.02401e-14	2.02761e-13	chrIV	1012252	1012959	708	+	NA	NA	TFIID-dominated	NA	NA	CR
YDR276C	-3.73131	1.55935e-85	8.55646e-84	-3.8298	3.12433e-86	4.43681e-85	-3.2043	4.5857e-37	1.79756e-36	-4.84773	2.34629e-49	1.22702e-48	-1.42173	6.72798e-17	3.01906e-15	-1.48477	5.95724e-19	5.68851e-18	-1.7637	2.47064e-05	3.6343e-05	-2.14277	4.16373e-09	7.93103e-09	chrIV	1013476	1013643	168	-	TATA-containing	0_mis	SAGA-dominated	TAF1-depleted	NA	CR
YDR277C	-1.68088	2.23829e-19	4.83237e-19	-2.72196	3.04453e-45	8.17955e-45	-2.3217	1.30484e-07	1.62729e-07	-3.90818	6.68525e-31	1.15168e-30	-0.931583	0.000706501	0.00173537	-2.03169	2.33436e-13	9.81301e-13	-2.23315	6.70543e-09	1.14744e-08	-3.59822	1.33071e-09	2.61886e-09	chrIV	1014401	1015702	1302	-	TATA-containing	0_mis	SAGA-dominated	TAF1-depleted	NA	TFIID
YDR279W	-1.94293	1.11069e-26	3.6054e-26	-2.43159	1.54863e-37	3.32147e-37	-2.8183	4.5394e-37	1.78149e-36	-4.42801	3.08947e-32	5.50664e-32	-0.710938	0.00413006	0.00805777	-1.63296	3.16191e-11	1.01283e-10	-2.26693	3.26589e-25	1.6476e-24	-2.80596	6.83865e-17	2.16618e-16	chrIV	1019368	1020420	1053	+	NA	NA	TFIID-dominated	NA	NA	TFIID
YDR280W	-1.45368	6.82074e-14	1.13054e-13	-2.4661	3.44288e-35	6.95165e-35	-2.4241	1.50074e-30	3.31102e-30	-3.66253	1.32361e-41	3.60795e-41	-1.04517	9.01192e-07	5.23562e-06	-1.15119	4.56403e-08	1.00924e-07	-2.22036	2.99629e-21	1.07307e-20	-2.31974	6.37569e-11	1.35757e-10	chrIV	1020747	1021664	918	+	TATA-less	1_mis	TFIID-dominated	TAF1-enriched	NA	TFIID
YDR281C	-3.97996	9.17491e-39	5.92568e-38	-3.05934	4.889e-18	7.12724e-18	-3.70936	1.34629e-35	4.53976e-35	-5.06121	1.51047e-14	2.05574e-14	-2.88389	1.35101e-10	2.03599e-09	-1.00587	0.0240297	0.0321363	-2.81071	3.04135e-13	6.33339e-13	-3.0782	2.64492e-07	4.57201e-07	chrIV	1022007	1022321	315	-	TATA-less	1_mis	SAGA/TFIID-dominated	TAF1-enriched	NA	NA
YDR282C	-2.2021	1.42539e-19	3.10767e-19	-3.39875	1.73462e-39	3.92925e-39	-2.52556	2.85355e-32	7.24953e-32	-2.62054	4.63126e-16	6.3791e-16	-0.99992	0.00208466	0.00443248	-0.707462	0.0214828	0.0288362	-1.65212	9.61223e-15	2.16416e-14	-0.672361	0.0157017	0.0209592	chrIV	1023511	1024755	1245	-	TATA-containing	0_mis	TFIID-dominated	TAF1-enriched	NA	TFIID
YDR283C	-1.10453	1.58346e-14	2.69569e-14	-1.92972	1.82461e-40	4.26114e-40	-1.69867	7.04231e-16	9.44089e-16	-3.26742	1.37557e-35	2.74017e-35	0.184756	0.17625	0.223443	-0.0985087	0.467688	0.524267	-0.603977	4.2151e-05	6.15596e-05	-0.656461	0.000852025	0.00123322	chrIV	1025070	1030049	4980	-	TATA-less	3_mis	TFIID-dominated	TAF1-enriched	NA	TFIID
YDR284C	-2.35456	9.58683e-41	6.99533e-40	-3.39588	5.9042e-76	5.09395e-75	-2.7918	4.92563e-46	5.62797e-45	-4.53098	1.16194e-54	1.12538e-53	-1.05762	4.11922e-07	2.65761e-06	-1.51193	1.03542e-13	4.60726e-13	-1.68477	3.06127e-25	1.54557e-24	-2.17544	1.84946e-19	7.25763e-19	chrIV	1030550	1031419	870	-	TATA-containing	0_mis	TFIID-dominated	TAF1-enriched	NA	TFIID
YDR285W	-1.81828	9.42119e-15	1.62158e-14	-3.41466	3.07223e-40	7.11185e-40	-2.32445	5.17482e-23	7.96592e-23	-3.23065	8.99826e-21	1.30222e-20	-0.956208	0.00528267	0.00997949	-1.76777	2.51435e-07	5.16208e-07	-2.09867	4.01314e-18	1.127e-17	-2.08779	7.30484e-10	1.46007e-09	chrIV	1032436	1035063	2628	+	NA	NA	TFIID-dominated	NA	NA	TFIID
YDR287W	-2.39622	5.64645e-22	1.39514e-21	-3.53175	7.77408e-40	1.77564e-39	-2.80724	6.30709e-35	2.00008e-34	-4.25477	8.08578e-27	1.2747e-26	-0.807166	0.00415901	0.00810373	-1.55813	1.34558e-08	3.16599e-08	-1.43329	9.86563e-12	1.90418e-11	-1.643	1.19408e-08	2.21724e-08	chrIV	1035995	1036873	879	+	NA	NA	TFIID-dominated	NA	NA	TFIID
YDR288W	-1.68462	4.68854e-19	9.95318e-19	-2.69778	3.87849e-41	9.23058e-41	-2.52144	5.5702e-31	1.26642e-30	-4.25322	1.55921e-43	4.82361e-43	-0.993973	0.000204539	0.00059329	-1.29255	1.04407e-06	2.01691e-06	-2.23883	2.64918e-27	1.67319e-26	-2.69172	2.04853e-20	8.72668e-20	chrIV	1037195	1038106	912	+	TATA-less	1_mis	TFIID-dominated	TAF1-enriched	NA	TFIID
YDR289C	-0.963682	1.55077e-08	2.15799e-08	-2.75071	2.65431e-54	9.79866e-54	-2.1096	8.93023e-20	1.26869e-19	-3.98551	9.20583e-44	2.89397e-43	-0.330602	0.17478	0.22196	-1.11679	2.87775e-06	5.29043e-06	-1.60262	5.7578e-18	1.59631e-17	-2.79627	1.32035e-24	8.48405e-24	chrIV	1038280	1039509	1230	-	NA	NA	TFIID-dominated	NA	NA	TFIID
YDR291W	-1.98027	9.90138e-36	5.35596e-35	-3.29014	1.15472e-89	1.9508e-88	-2.80486	7.08961e-41	4.32273e-40	-4.56178	1.04195e-57	1.4393e-56	-1.03729	2.59782e-07	1.77746e-06	-1.62613	1.62514e-16	1.07919e-15	-2.11736	9.21334e-35	1.40638e-33	-2.42525	1.75011e-27	1.53211e-26	chrIV	1039728	1042961	3234	+	NA	NA	TFIID-dominated	NA	NA	TFIID
YDR292C	-1.71828	1.53752e-30	6.24386e-30	-2.50965	2.04922e-61	9.89831e-61	-2.53807	3.06239e-34	9.14084e-34	-3.80638	1.40435e-51	9.47618e-51	-0.679017	5.28973e-06	2.47912e-05	-1.34853	9.57583e-20	1.05625e-18	-1.74142	2.24132e-28	1.62321e-27	-2.03806	4.22084e-22	2.10337e-21	chrIV	1043146	1045011	1866	-	TATA-less	2_mis	TFIID-dominated	TAF1-enriched	NA	TFIID
YDR293C	-1.73391	9.35956e-34	4.54654e-33	-2.62071	3.20354e-74	2.60653e-73	-2.52792	3.06894e-38	1.37314e-37	-3.97431	2.21985e-49	1.16452e-48	0.171836	0.166296	0.212572	-0.309265	0.0119488	0.0163783	-0.681052	1.03776e-05	1.54928e-05	-0.670675	0.000363495	0.000535997	chrIV	1045640	1049392	3753	-	TATA-less	2_mis	TFIID-dominated	TAF1-enriched	NA	TFIID
YDR294C	-2.07615	3.81294e-47	3.95657e-46	-2.83398	8.83975e-84	1.11047e-82	-2.48032	2.96294e-32	7.49903e-32	-4.29038	2.48051e-55	2.60454e-54	-0.730321	2.38278e-06	1.23196e-05	-1.26083	3.89819e-17	2.80845e-16	-1.46807	2.89506e-20	9.59329e-20	-2.08352	1.81827e-23	1.03479e-22	chrIV	1050459	1052228	1770	-	TATA-containing	0_mis	TFIID-dominated	TAF1-enriched	NA	TFIID
YDR295C	-0.861209	2.57951e-06	3.43218e-06	-1.99873	4.67207e-27	7.83706e-27	-2.00513	4.01356e-23	6.20109e-23	-3.74789	7.4693e-39	1.71962e-38	-0.00675424	0.975753	0.979336	-1.19691	4.87997e-08	1.07583e-07	-1.57222	7.84837e-17	2.00611e-16	-2.41114	4.30521e-20	1.77713e-19	chrIV	1052623	1054647	2025	-	TATA-less	2_mis	TFIID-dominated	TAF1-depleted	NA	TFIID
YDR296W	-1.5965	3.51677e-18	7.13654e-18	-2.35226	1.66607e-35	3.39804e-35	-2.45285	1.65704e-31	3.93687e-31	-3.90216	2.35823e-35	4.66455e-35	-0.938164	3.64065e-06	1.78996e-05	-1.97731	1.10114e-22	1.93618e-21	-2.20831	2.61687e-27	1.656e-26	-3.2647	4.25293e-23	2.32269e-22	chrIV	1055212	1055892	681	+	TATA-less	1_mis	TFIID-dominated	TAF1-enriched	NA	TFIID
YDR297W	-2.72316	1.10514e-60	2.12329e-59	-2.01579	8.96953e-33	1.7099e-32	-2.53963	1.52647e-32	3.95901e-32	-4.16284	9.33464e-44	2.93083e-43	-1.54605	8.50244e-14	2.21321e-12	-1.19058	2.39169e-09	6.08955e-09	-1.99859	1.81443e-24	8.51435e-24	-2.94496	8.8863e-23	4.65888e-22	chrIV	1056551	1057600	1050	+	TATA-containing	0_mis	SAGA-dominated	TAF1-depleted	NA	TFIID
YDR298C	-1.66363	1.40198e-30	5.71371e-30	-2.43565	1.06493e-60	5.02711e-60	-2.44654	7.44705e-32	1.82024e-31	-3.75471	1.12488e-45	4.17785e-45	-0.487348	0.000461155	0.00119677	-1.00159	5.31051e-13	2.12064e-12	-1.59081	2.68158e-15	6.23343e-15	-1.69734	1.62095e-15	4.60848e-15	chrIV	1058176	1058814	639	-	TATA-less	2_mis	TFIID-dominated	TAF1-enriched	NA	TFIID
YDR299W	-1.00535	7.28677e-10	1.04846e-09	-1.07159	1.10227e-10	1.47407e-10	-1.7793	1.25056e-13	1.63819e-13	-3.18964	2.88158e-28	4.66829e-28	-0.251093	0.178459	0.225958	0.100421	0.594757	0.648925	-0.964151	1.60626e-07	2.5838e-07	-1.47619	3.86102e-08	6.98711e-08	chrIV	1059627	1061231	1605	+	TATA-containing	0_mis	TFIID-dominated	TAF1-enriched	NA	TFIID
YDR300C	-1.49528	1.0704e-18	2.23023e-18	-1.75253	9.54359e-25	1.53337e-24	-2.28684	2.87269e-25	4.7691e-25	-3.59157	2.27885e-43	6.98895e-43	-0.414441	0.012376	0.0210396	-1.07423	3.55678e-11	1.13321e-10	-1.49188	9.09906e-18	2.48669e-17	-1.98905	1.58875e-17	5.33289e-17	chrIV	1061505	1062791	1287	-	TATA-less	2_mis	TFIID-dominated	TAF1-enriched	NA	TFIID
YDR301W	-1.22899	4.44511e-20	9.94746e-20	-2.21908	1.13514e-60	5.35117e-60	-2.23604	4.11757e-25	6.78206e-25	-3.49836	3.04557e-39	7.17587e-39	-0.0732267	0.625486	0.67366	-0.509481	0.000569673	0.000864756	-1.41517	4.23721e-15	9.75217e-15	-1.45492	6.36332e-11	1.35537e-10	chrIV	1063352	1067425	4074	+	TATA-less	1_mis	TFIID-dominated	TAF1-enriched	NA	TFIID
YDR302W	-2.18397	9.06048e-26	2.80949e-25	-3.46744	3.12639e-55	1.18737e-54	-2.83176	8.83331e-39	4.18102e-38	-4.43324	8.48012e-42	2.33993e-41	-1.08012	0.000127605	0.000392677	-1.78231	1.88307e-10	5.45732e-10	-2.24699	9.04183e-30	7.67378e-29	-2.99042	1.90752e-24	1.20434e-23	chrIV	1067731	1068390	660	+	NA	NA	TFIID-dominated	NA	NA	TFIID
YDR303C	-1.59312	1.22328e-18	2.53796e-18	-2.38009	4.14022e-39	9.28943e-39	-2.46469	2.60186e-31	6.07403e-31	-3.84703	7.17172e-45	2.47034e-44	-0.83884	3.79919e-06	1.85276e-05	-1.25534	3.91384e-12	1.40199e-11	-1.91706	3.42056e-25	1.7243e-24	-2.35684	2.95738e-24	1.82825e-23	chrIV	1068729	1071386	2658	-	TATA-less	2_mis	TFIID-dominated	TAF1-enriched	NA	TFIID
YDR304C	-2.1327	2.32441e-37	1.38395e-36	-2.75834	2.4149e-58	1.04967e-57	-2.59091	2.20895e-38	1.00717e-37	-3.94503	6.41511e-43	1.90587e-42	-0.11003	0.374746	0.434674	-0.412359	0.000736732	0.00110908	-0.348685	0.0244389	0.0312339	-0.340199	0.0601794	0.076345	chrIV	1071880	1072557	678	-	NA	NA	TFIID-dominated	NA	NA	TFIID
YDR305C	-1.43473	1.23648e-08	1.72625e-08	-2.67405	3.24298e-24	5.17413e-24	-1.80555	4.47529e-17	6.10076e-17	-3.23501	4.10427e-22	6.03817e-22	-0.564218	0.0464536	0.068228	-1.38778	7.56757e-07	1.48424e-06	-1.6132	1.19336e-14	2.67572e-14	-2.38705	5.12282e-14	1.31591e-13	chrIV	1072746	1073488	743	-	TATA-less	2_mis	TFIID-dominated	TAF1-enriched	NA	TFIID
YDR306C	-1.43277	2.62061e-16	4.83974e-16	-2.80977	6.67989e-55	2.50917e-54	-2.52707	6.34671e-34	1.83956e-33	-4.02872	2.00286e-45	7.27441e-45	-0.641542	0.00827241	0.0147427	-1.89392	6.02553e-15	3.15304e-14	-1.97058	4.57911e-25	2.28185e-24	-2.36686	6.29805e-20	2.57799e-19	chrIV	1073735	1075171	1437	-	NA	NA	TFIID-dominated	NA	NA	TFIID
YDR308C	-1.62998	1.92764e-17	3.78412e-17	-2.25592	5.93046e-30	1.0604e-29	-2.67794	2.12708e-33	5.90984e-33	-3.86751	9.58454e-30	1.6052e-29	-1.11508	1.66185e-05	6.66626e-05	-2.03601	3.55344e-15	1.91301e-14	-2.63351	5.65543e-28	3.86395e-27	-3.41764	3.87764e-20	1.60878e-19	chrIV	1078027	1078449	423	-	TATA-less	1_mis	TFIID-dominated	TAF1-depleted	NA	TFIID
YDR309C	-1.76747	2.57615e-25	7.73635e-25	-1.88488	2.75341e-28	4.74514e-28	-2.95853	2.15474e-42	1.54071e-41	-4.37344	1.07675e-44	3.65844e-44	-0.872299	1.18509e-06	6.59809e-06	-1.01627	8.10855e-09	1.95352e-08	-2.66799	2.45047e-16	6.06383e-16	-2.6634	1.93075e-07	3.36424e-07	chrIV	1079048	1080199	1152	-	TATA-less	1_mis	SAGA-dominated	TAF1-depleted	NA	CR
YDR310C	-1.66653	3.67329e-27	1.22366e-26	-2.36988	7.42728e-52	2.50215e-51	-2.53402	9.86378e-32	2.38487e-31	-4.0877	8.30778e-50	4.58288e-49	-0.597037	2.59142e-05	9.83104e-05	-0.896576	2.42956e-10	6.93358e-10	-1.71797	1.47717e-22	5.84591e-22	-2.0198	1.17969e-18	4.3395e-18	chrIV	1081128	1084316	3189	-	TATA-less	1_mis	nocall	TAF1-enriched	NA	TFIID
YDR311W	-1.25252	8.72669e-14	1.43644e-13	-2.17477	9.16962e-37	1.92691e-36	-2.25991	7.63546e-24	1.20497e-23	-4.10218	3.37629e-43	1.02382e-42	-0.421676	0.0435264	0.0644006	-1.25868	1.64233e-09	4.24772e-09	-1.95884	5.22766e-25	2.5971e-24	-2.43838	1.3378e-19	5.31373e-19	chrIV	1085065	1086993	1929	+	TATA-less	2_mis	TFIID-dominated	TAF1-enriched	NA	TFIID
YDR312W	-1.17199	7.81094e-12	1.19428e-11	-1.8252	6.7159e-25	1.08209e-24	-2.42972	3.86491e-24	6.14993e-24	-3.78422	2.29153e-31	3.98535e-31	-0.353651	0.120217	0.159186	-0.84256	0.000304221	0.000471767	-1.84591	2.01539e-19	6.26136e-19	-2.25245	2.63768e-11	5.73814e-11	chrIV	1087581	1088942	1362	+	TATA-less	1_mis	TFIID-dominated	TAF1-enriched	NA	TFIID
YDR313C	-1.54455	4.51764e-15	7.88661e-15	-2.13103	2.76396e-26	4.5627e-26	-2.39667	1.99415e-28	3.87562e-28	-3.75671	2.56275e-38	5.73366e-38	-0.522184	0.0690594	0.0970814	-1.28499	6.55998e-06	1.16759e-05	-2.23854	7.58692e-19	2.25394e-18	-2.98978	1.65789e-19	6.52946e-19	chrIV	1089219	1090079	861	-	TATA-less	1_mis	TFIID-dominated	TAF1-enriched	NA	TFIID
YDR314C	-1.84381	4.56382e-29	1.71337e-28	-2.9463	2.45423e-67	1.52202e-66	-2.42213	1.64434e-24	2.64411e-24	-4.18199	4.05727e-53	3.1951e-52	-1.25684	6.59986e-07	3.97247e-06	-1.96957	1.72056e-15	9.63545e-15	-2.18893	4.62114e-30	4.0322e-29	-3.25368	3.27385e-31	4.37542e-30	chrIV	1090433	1092511	2079	-	TATA-less	1_mis	TFIID-dominated	TAF1-enriched	NA	TFIID
YDR315C	-1.75425	1.22633e-10	1.80541e-10	-3.52437	2.1345e-31	3.9505e-31	-2.53411	2.63749e-25	4.38731e-25	-4.42819	6.82564e-25	1.04169e-24	-0.537901	0.17234	0.219132	-1.65393	2.45402e-05	4.14025e-05	-1.61859	4.11755e-10	7.38936e-10	-2.48783	9.44632e-11	1.9861e-10	chrIV	1092741	1093586	846	-	NA	NA	TFIID-dominated	NA	NA	TFIID
YDR316W	-1.58175	1.32168e-11	2.00517e-11	-3.80521	1.7212e-49	5.37601e-49	-2.28493	3.3259e-19	4.67648e-19	-4.06625	1.9578e-40	4.94474e-40	-1.08344	0.0001238	0.00038352	-1.79872	1.57313e-10	4.61842e-10	-2.20954	3.02922e-28	2.14381e-27	-3.04942	1.0636e-06	1.79246e-06	chrIV	1093763	1095178	1416	+	TATA-less	1_mis	TFIID-dominated	TAF1-enriched	NA	TFIID
YDR317W	-2.2337	9.37322e-11	1.3829e-10	-3.41569	1.37505e-17	1.99355e-17	-2.98808	9.78053e-29	1.93163e-28	-3.84945	1.98799e-14	2.70182e-14	-1.69326	0.00133274	0.00299804	-1.14572	0.0265565	0.0354285	-2.16965	1.67632e-10	3.06058e-10	-2.57551	7.52258e-06	1.21291e-05	chrIV	1102184	1103428	1245	+	NA	NA	nocall	NA	NA	NA
YDR318W	-2.25927	6.80851e-25	1.98131e-24	-4.11535	1.04e-61	5.07715e-61	-3.03172	1.22027e-32	3.18582e-32	-4.91392	1.54822e-44	5.18459e-44	-1.30669	0.000152488	0.000460527	-2.21781	1.10264e-10	3.30084e-10	-2.82782	2.02009e-35	3.35891e-34	-3.22135	4.74504e-23	2.5725e-22	chrIV	1103758	1104947	1190	+	NA	NA	TFIID-dominated	NA	NA	TFIID
YDR320C	-1.95989	1.97286e-32	8.84433e-32	-3.00982	3.67114e-67	2.2563e-66	-2.93898	5.47184e-27	9.83377e-27	-3.51098	1.08152e-08	1.40581e-08	-0.427234	0.0418908	0.0622257	-1.3563	1.31576e-10	3.89076e-10	-2.35187	0.00031678	0.000444324	-0.546705	0.66784	0.713457	chrIV	1106095	1108101	2007	-	TATA-less	2_mis	TFIID-dominated	TAF1-enriched	NA	TFIID
YDR320C-A	-2.83384	1.07873e-30	4.42259e-30	-2.85357	1.35191e-27	2.2907e-27	-2.98055	1.9408e-24	3.11186e-24	-5.41141	7.55218e-32	1.33096e-31	-1.47291	3.07099e-08	2.68608e-07	-1.53173	8.24741e-09	1.98478e-08	-2.20155	1.39961e-15	3.29457e-15	-3.29131	5.14491e-17	1.64647e-16	chrIV	1108280	1108498	219	-	NA	NA	NA	NA	NA	TFIID
YDR321W	-1.88206	5.6025e-36	3.07667e-35	-1.96053	2.40469e-37	5.13345e-37	-2.46357	2.12068e-31	4.98542e-31	-3.79491	3.22119e-44	1.05051e-43	-0.130484	0.31943	0.377428	-0.121715	0.34474	0.399671	-0.227378	0.121569	0.147558	-0.131895	0.503651	0.559117	chrIV	1108702	1109847	1146	+	TATA-less	2_mis	TFIID-dominated	TAF1-enriched	NA	TFIID
YDR322C-A	-1.98066	1.01523e-23	2.77872e-23	-2.88169	4.67278e-42	1.14344e-41	-2.38371	1.54862e-21	2.29133e-21	-4.4113	1.52947e-43	4.73595e-43	-0.822794	0.000162406	0.000484639	-1.3024	3.15686e-09	7.93888e-09	-1.73832	1.14166e-15	2.69907e-15	-2.3601	7.6923e-23	4.05571e-22	chrIV	1112003	1112293	291	-	TATA-less	1_mis	NA	TAF1-enriched	NA	TFIID
YDR322W	-1.80728	4.10132e-29	1.54481e-28	-2.88184	5.51496e-67	3.35347e-66	-2.78655	8.65754e-42	5.82993e-41	-4.66666	3.78068e-45	1.33572e-44	-0.969835	1.66802e-06	8.91538e-06	-2.01624	1.40385e-23	2.79957e-22	-2.40975	1.28524e-23	5.56622e-23	-3.6625	1.62232e-06	2.70955e-06	chrIV	1110589	1111692	1104	+	TATA-less	2_mis	TFIID-dominated	TAF1-enriched	NA	TFIID
YDR323C	-1.81791	4.04878e-15	7.09337e-15	-3.48967	3.35452e-42	8.24093e-42	-2.96509	2.77241e-37	1.11881e-36	-3.9851	9.49402e-33	1.71948e-32	-1.14848	0.000902733	0.0021379	-1.48003	1.47558e-05	2.53794e-05	-2.35377	1.74122e-19	5.4199e-19	-2.45587	1.71452e-12	3.98223e-12	chrIV	1112480	1114027	1548	-	TATA-less	2_mis	TFIID-dominated	TAF1-enriched	NA	TFIID
YDR324C	-1.7182	6.9621e-33	3.21137e-32	-2.16525	1.47726e-49	4.62884e-49	-2.62562	5.1893e-31	1.18343e-30	-3.8338	3.86867e-49	1.99226e-48	-0.998757	3.85423e-10	5.3277e-09	-0.983149	1.16685e-09	3.07262e-09	-2.24808	5.41515e-42	2.06409e-40	-2.59406	2.34309e-32	3.52112e-31	chrIV	1114433	1116763	2331	-	TATA-less	1_mis	TFIID-dominated	TAF1-enriched	NA	TFIID
YDR325W	-2.13992	7.24078e-48	7.78441e-47	-2.92604	2.3382e-83	2.869e-82	-2.74001	5.90243e-36	2.064e-35	-4.24886	1.75593e-50	1.04472e-49	-0.915339	2.88545e-07	1.94291e-06	-1.46865	1.16032e-16	7.81635e-16	-2.05905	2.88721e-33	3.58454e-32	-2.19	4.5127e-24	2.72769e-23	chrIV	1117126	1120233	3108	+	TATA-less	1_mis	TFIID-dominated	TAF1-enriched	NA	TFIID
YDR326C	-1.65994	1.98181e-31	8.46404e-31	-2.24373	4.00908e-55	1.51589e-54	-2.2528	2.72481e-23	4.23334e-23	-3.63251	1.90827e-37	4.12561e-37	-0.741834	5.56844e-06	2.59156e-05	-1.16125	7.25906e-13	2.86033e-12	-1.61532	5.64153e-19	1.69454e-18	-1.83096	8.66641e-16	2.50765e-15	chrIV	1120609	1124925	4317	-	TATA-containing	0_mis	TFIID-dominated	TAF1-enriched	NA	TFIID
YDR328C	-1.83126	1.08867e-24	3.13616e-24	-2.18178	3.13358e-33	6.05614e-33	-2.37021	1.39873e-33	3.9384e-33	-3.93651	1.08731e-44	3.69247e-44	-0.245255	0.0844904	0.116044	-0.707624	3.99698e-07	8.06424e-07	-0.650655	4.57457e-05	6.67346e-05	-0.899255	8.07874e-06	1.30194e-05	chrIV	1125434	1126018	585	-	TATA-less	2_mis	TFIID-dominated	TAF1-enriched	NA	TFIID
YDR329C	-1.57898	6.29653e-18	1.26317e-17	-2.13008	3.19015e-30	5.74914e-30	-2.26225	5.09936e-30	1.09095e-29	-4.09088	2.50909e-48	1.18527e-47	-0.549367	0.00557991	0.0104654	-1.27432	5.45011e-11	1.70082e-10	-1.74596	4.76015e-21	1.68166e-20	-2.64291	9.76783e-28	8.86033e-27	chrIV	1126270	1127595	1326	-	TATA-less	1_mis	nocall	TAF1-enriched	NA	TFIID
YDR330W	-1.00799	7.5227e-11	1.11179e-10	-2.37809	1.71116e-52	5.91874e-52	-2.52731	3.58386e-39	1.76872e-38	-3.93037	4.74381e-48	2.168e-47	-0.265915	0.143439	0.186244	-1.38255	3.29485e-15	1.78555e-14	-2.11028	3.51677e-28	2.45421e-27	-2.92906	8.772e-32	1.24372e-30	chrIV	1127872	1129374	1503	+	TATA-less	1_mis	SAGA-dominated	TAF1-enriched	NA	TFIID
YDR331W	-1.69674	2.42387e-24	6.86146e-24	-2.21165	1.53802e-38	3.3986e-38	-2.313	3.39178e-27	6.16208e-27	-3.90606	1.11466e-37	2.43485e-37	-0.722176	0.000888252	0.00211193	-1.2741	2.24284e-09	5.73286e-09	-2.03983	6.85844e-26	3.69449e-25	-3.00806	7.87815e-30	8.92036e-29	chrIV	1129588	1130823	1236	+	TATA-less	2_mis	TFIID-dominated	TAF1-enriched	NA	TFIID
YDR332W	-1.91696	2.59987e-22	6.55847e-22	-3.10466	1.14542e-49	3.60221e-49	-3.00655	9.02639e-43	6.87954e-42	-4.29685	2.95239e-32	5.26648e-32	-0.80506	0.00553004	0.0103816	-2.05814	8.95711e-13	3.48119e-12	-2.55357	3.37059e-19	1.02805e-18	-2.80895	7.86928e-09	1.47736e-08	chrIV	1131001	1133070	2070	+	TATA-less	1_mis	TFIID-dominated	TAF1-enriched	NA	TFIID
YDR333C	-0.992978	7.85582e-13	1.24585e-12	-1.71299	1.26554e-34	2.52481e-34	-1.78411	7.96058e-19	1.11001e-18	-3.20895	3.09863e-34	5.8839e-34	-0.334039	0.0432527	0.0640272	-0.977313	1.51158e-09	3.91575e-09	-1.41989	1.05706e-14	2.37502e-14	-2.26263	2.17109e-25	1.54583e-24	chrIV	1133260	1135431	2172	-	TATA-less	2_mis	TFIID-dominated	TAF1-enriched	NA	TFIID
YDR334W	-1.89384	7.75078e-35	4.00622e-34	-3.51875	3.2125e-113	1.54088e-111	-2.89368	4.79939e-40	2.62129e-39	-4.34624	4.1178e-63	1.09284e-61	-1.40453	3.46007e-16	1.44482e-14	-2.27389	5.80576e-41	7.30297e-39	-2.85741	3.78878e-69	1.23476e-66	-3.36665	9.68156e-56	1.19138e-53	chrIV	1135932	1140476	4545	+	TATA-less	2_mis	TFIID-dominated	TAF1-enriched	NA	TFIID
YDR335W	-1.38979	7.22693e-14	1.1956e-13	-3.03086	2.99652e-59	1.34334e-58	-2.544	4.26424e-34	1.2566e-33	-3.89684	1.43065e-48	6.92815e-48	-0.21055	0.146534	0.189853	-0.689773	1.07229e-06	2.06838e-06	-1.28521	3.96859e-18	1.11545e-17	-1.28555	3.23182e-11	7.00497e-11	chrIV	1141168	1144842	3675	+	TATA-less	2_mis	TFIID-dominated	TAF1-enriched	NA	TFIID
YDR337W	-1.56901	6.83706e-23	1.78922e-22	-3.11235	4.56029e-78	4.35035e-77	-2.51304	2.85347e-33	7.84835e-33	-3.97226	1.784e-43	5.51143e-43	-0.841871	6.88569e-05	0.00023126	-2.11158	1.30246e-22	2.25381e-21	-2.23087	8.44483e-35	1.29819e-33	-3.47977	2.63231e-29	2.80175e-28	chrIV	1146319	1147179	861	+	TATA-less	2_mis	TFIID-dominated	TAF1-enriched	NA	TFIID
YDR339C	-1.7814	1.49861e-20	3.44468e-20	-2.16476	1.95447e-28	3.38357e-28	-2.34302	3.36457e-28	6.4567e-28	-3.92699	9.49996e-43	2.78917e-42	-0.767518	0.000715652	0.00175355	-1.30542	9.7337e-09	2.3245e-08	-1.92742	8.75375e-26	4.6768e-25	-2.44093	4.14616e-23	2.26666e-22	chrIV	1149951	1150520	570	-	TATA-less	2_mis	TFIID-dominated	TAF1-enriched	NA	TFIID
YDR341C	-2.237	7.74065e-50	9.10688e-49	-2.86009	6.3088e-79	6.23517e-78	-2.57311	4.81354e-40	2.62688e-39	-3.83029	7.37161e-50	4.10339e-49	-0.0529597	0.649351	0.696619	-0.201421	0.0802857	0.102408	-0.357178	0.0154671	0.019991	-0.24331	0.171968	0.207238	chrIV	1151803	1153626	1824	-	TATA-less	2_mis	TFIID-dominated	TAF1-enriched	NA	TFIID
YDR342C	-1.44991	0.000700343	0.000890555	-2.2088	9.6361e-07	1.23633e-06	-0.522243	0.229654	0.256501	-3.09783	1.17141e-09	1.53419e-09	-0.377539	0.407205	0.467187	-0.64878	0.161619	0.198601	-0.304484	0.493031	0.551877	-1.38856	0.0121616	0.0163846	chrIV	1154216	1155928	1713	-	NA	NA	SAGA-dominated	NA	NA	NA
YDR343C	0.241837	0.635262	0.679868	-1.32982	0.0129829	0.0155818	0.244486	0.489738	0.528763	-0.634154	0.313236	0.34792	1.47013	0.00800703	0.0143335	0.504626	0.366227	0.421964	1.00769	0.0931519	0.1143	-0.142102	0.84319	0.861282	chrIV	1159608	1161320	1713	-	NA	NA	SAGA-dominated	NA	NA	NA
YDR345C	-2.90423	8.44339e-54	1.19409e-52	-2.14228	5.92118e-30	1.05902e-29	-1.73698	8.79856e-17	1.19361e-16	-3.78474	3.01499e-47	1.27985e-46	-1.39693	7.11524e-20	5.34799e-18	-0.705038	3.42688e-06	6.25424e-06	-0.722291	3.24449e-05	4.75654e-05	-1.17481	2.13453e-10	4.38746e-10	chrIV	1162957	1164660	1704	-	TATA-containing	0_mis	SAGA-dominated	TAF1-depleted	NA	CR
YDR346C	-1.80294	1.15689e-32	5.26552e-32	-2.62886	1.83029e-65	1.04966e-64	-2.32831	2.36814e-32	6.06458e-32	-3.68607	2.66444e-41	7.1387e-41	-0.791055	1.5656e-08	1.48251e-07	-0.913766	4.1431e-11	1.31044e-10	-1.26381	2.21269e-18	6.35625e-18	-1.34436	2.57365e-11	5.60072e-11	chrIV	1167214	1168659	1446	-	NA	NA	TFIID-dominated	NA	NA	TFIID
YDR347W	-1.8645	1.45258e-32	6.55477e-32	-2.57626	3.84309e-58	1.65784e-57	-2.50012	1.43717e-31	3.43028e-31	-3.99809	9.77605e-41	2.51432e-40	-0.861803	3.00595e-06	1.51324e-05	-1.54334	1.90333e-17	1.45101e-16	-2.13598	5.25245e-26	2.8697e-25	-3.03709	1.84057e-30	2.26922e-29	chrIV	1169178	1170143	966	+	TATA-less	2_mis	TFIID-dominated	TAF1-enriched	NA	TFIID
YDR348C	-1.65997	4.72775e-27	1.56807e-26	-2.82518	1.18654e-70	8.43369e-70	-2.7139	2.90147e-40	1.63668e-39	-4.45707	2.78254e-53	2.23033e-52	-0.967697	1.11281e-06	6.25944e-06	-1.79173	2.41071e-19	2.49501e-18	-2.16693	8.20523e-24	3.61607e-23	-2.74992	6.34414e-27	5.20678e-26	chrIV	1170326	1171825	1500	-	TATA-less	2_mis	nocall	TAF1-depleted	NA	TFIID
YDR349C	-1.47619	1.7457e-19	3.79276e-19	-1.86004	2.54199e-29	4.47868e-29	-2.09623	1.01592e-24	1.64584e-24	-3.44156	6.34237e-34	1.19491e-33	-0.221223	0.156798	0.201545	-0.666216	1.35411e-05	2.33392e-05	-1.28389	3.59252e-12	7.08504e-12	-1.41978	1.5023e-08	2.76936e-08	chrIV	1172386	1174176	1791	-	TATA-less	1_mis	nocall	TAF1-enriched	NA	TFIID
YDR350C	-1.1539	7.63979e-14	1.26177e-13	-2.14449	7.12039e-43	1.78897e-42	-2.20528	1.39967e-29	2.90098e-29	-3.50233	2.49393e-37	5.36768e-37	-0.457522	0.0348555	0.0529258	-1.4553	5.20878e-12	1.84465e-11	-1.77639	3.09657e-22	1.19997e-21	-2.11924	1.90465e-16	5.83473e-16	chrIV	1176120	1178174	2055	-	TATA-less	1_mis	TFIID-dominated	TAF1-enriched	NA	TFIID
YDR351W	-1.0947	3.62288e-15	6.36347e-15	-1.62332	8.65536e-31	1.57933e-30	-1.91525	2.70117e-19	3.80923e-19	-2.88341	2.50928e-29	4.16013e-29	-0.268056	0.123243	0.162764	-0.657835	0.000120417	0.000192156	-1.73661	1.15528e-20	3.94455e-20	-2.53465	1.23173e-18	4.51059e-18	chrIV	1178666	1181260	2595	+	TATA-less	1_mis	TFIID-dominated	TAF1-depleted	NA	TFIID
YDR352W	-1.99082	8.04541e-26	2.50152e-25	-2.74184	8.77535e-45	2.33205e-44	-2.72451	5.65385e-40	3.05605e-39	-3.52711	9.09738e-36	1.82408e-35	-1.2011	2.17482e-07	1.51532e-06	-1.42264	4.51185e-10	1.24787e-09	-2.36704	1.2628e-16	3.19151e-16	-2.75364	7.27906e-16	2.11466e-15	chrIV	1181801	1182754	954	+	NA	NA	TFIID-dominated	NA	NA	TFIID
YDR353W	-2.69918	1.94237e-44	1.75068e-43	-3.90387	4.00953e-91	7.35331e-90	-3.34058	6.89125e-76	3.08131e-73	-4.72648	1.40557e-80	3.15831e-78	-0.794774	6.18896e-09	6.51738e-08	-1.93416	7.51367e-47	2.04779e-44	-1.92705	2.10565e-39	5.84026e-38	-2.22874	8.4315e-33	1.3478e-31	chrIV	1183299	1184258	960	+	TATA-less	1_mis	TFIID-dominated	TAF1-enriched	NA	CR
YDR354W	-1.68345	2.17328e-19	4.6994e-19	-2.24027	5.34914e-33	1.02629e-32	-2.20992	1.3695e-29	2.84021e-29	-3.19315	3.08201e-34	5.85399e-34	-0.234682	0.169414	0.216006	-1.58753	2.86726e-22	4.64227e-21	-1.97167	6.40071e-28	4.35489e-27	-2.62455	2.17603e-27	1.88473e-26	chrIV	1184747	1185889	1143	+	TATA-less	1_mis	TFIID-dominated	TAF1-enriched	NA	TFIID
YDR356W	-1.73553	8.74798e-25	2.52961e-24	-3.18816	1.11587e-74	9.22143e-74	-2.54842	6.59515e-26	1.12841e-25	-3.94603	1.82515e-53	1.49858e-52	-1.13451	1.25916e-07	9.29001e-07	-1.55859	1.56851e-13	6.7409e-13	-2.35206	2.242e-39	6.19211e-38	-2.80811	6.68742e-28	6.19537e-27	chrIV	1186107	1188941	2835	+	NA	NA	TFIID-dominated	NA	NA	TFIID
YDR357C	-1.47164	1.24298e-06	1.65932e-06	-3.017	1.40185e-20	2.11884e-20	-2.03827	3.79402e-21	5.56328e-21	-3.67564	3.35898e-16	4.63424e-16	0.0673001	0.775207	0.80489	-0.696947	0.00334632	0.00478956	-0.343498	0.0550418	0.0688736	-0.711919	0.00361806	0.00503779	chrIV	1189199	1189567	369	-	TATA-less	2_mis	TFIID-dominated	TAF1-depleted	NA	TFIID
YDR358W	-1.59091	4.26771e-19	9.07103e-19	-3.43811	4.93386e-76	4.28372e-75	-2.46966	2.05819e-34	6.24912e-34	-4.1317	5.05511e-49	2.566e-48	-0.501809	0.0382865	0.0576551	-1.81606	2.86441e-14	1.3686e-13	-2.15655	1.19305e-26	7.02468e-26	-3.0303	2.10916e-29	2.26996e-28	chrIV	1190059	1191732	1674	+	TATA-containing	0_mis	SAGA-dominated	TAF1-depleted	NA	TFIID
YDR359C	-3.20973	9.4592e-90	6.23853e-88	-4.51584	6.44984e-147	9.831e-145	-3.50599	1.81566e-63	2.17457e-61	-3.96511	3.91295e-38	8.69387e-38	-1.95937	1.47623e-19	1.06946e-17	-2.33845	3.41991e-28	1.15905e-26	-2.44363	2.06543e-15	4.827e-15	-1.73037	0.00138501	0.00197486	chrIV	1191936	1194884	2949	-	TATA-less	2_mis	TFIID-dominated	TAF1-depleted	NA	TFIID
YDR361C	-1.74086	1.47209e-24	4.2212e-24	-1.8635	1.05105e-26	1.75064e-26	-2.5611	2.23009e-33	6.18322e-33	-3.8043	7.89356e-44	2.49814e-43	-0.758925	1.29739e-05	5.41001e-05	-1.17568	1.79779e-11	5.9271e-11	-1.76161	2.04269e-23	8.65685e-23	-2.31578	7.46337e-23	3.93819e-22	chrIV	1195412	1196263	852	-	TATA-less	1_mis	TFIID-dominated	TAF1-depleted	NA	TFIID
YDR362C	-1.88028	5.11545e-25	1.50523e-24	-3.38527	4.35175e-67	2.66744e-66	-2.74795	6.1975e-34	1.79709e-33	-4.3883	3.20263e-52	2.31145e-51	-1.07896	5.85792e-05	0.00020059	-1.59942	1.25193e-09	3.27818e-09	-2.60113	9.49591e-30	8.03823e-29	-3.0284	5.72689e-16	1.68171e-15	chrIV	1196679	1198697	2019	-	TATA-less	2_mis	TFIID-dominated	TAF1-enriched	NA	TFIID
YDR363W	-2.04744	3.83243e-16	7.02475e-16	-4.3123	3.81879e-57	1.5779e-56	-3.12029	1.15958e-34	3.58235e-34	-4.31471	2.30169e-46	9.10544e-46	-1.24223	4.6401e-05	0.000163834	-1.78625	5.91813e-09	1.44929e-08	-2.54875	1.2037e-26	7.08095e-26	-2.52666	8.72487e-14	2.20045e-13	chrIV	1199183	1200553	1371	+	TATA-less	1_mis	TFIID-dominated	TAF1-enriched	NA	TFIID
YDR363W-A	-2.18818	4.90394e-28	1.72228e-27	-3.48417	1.08021e-61	5.26593e-61	-2.81746	1.76903e-35	5.88535e-35	-3.71923	7.32051e-33	1.33084e-32	-1.28286	1.09244e-09	1.37137e-08	-1.91296	1.86004e-20	2.29125e-19	-1.4639	2.54303e-18	7.26994e-18	-1.72979	6.25038e-16	1.82967e-15	chrIV	1202128	1202397	270	+	TATA-less	1_mis	NA	TAF1-enriched	NA	TFIID
YDR364C	-1.64354	2.88779e-22	7.26077e-22	-2.68379	2.93148e-51	9.73704e-51	-2.65981	1.09491e-35	3.72014e-35	-4.1032	6.97047e-43	2.0645e-42	-0.792939	0.000717783	0.00175806	-1.53108	6.0405e-11	1.8699e-10	-2.17506	1.22196e-25	6.41797e-25	-2.55444	1.83795e-22	9.44609e-22	chrIV	1202843	1204210	1368	-	TATA-less	1_mis	TFIID-dominated	TAF1-enriched	NA	TFIID
YDR365C	-1.89343	1.74161e-33	8.28986e-33	-2.51722	4.50021e-56	1.76685e-55	-2.81058	2.78619e-31	6.4908e-31	-4.37687	1.5817e-62	3.87719e-61	-0.746498	7.39022e-07	4.39105e-06	-0.710556	2.18341e-06	4.07465e-06	-1.24171	2.55772e-14	5.64171e-14	-1.46268	7.24122e-14	1.83336e-13	chrIV	1204497	1206383	1887	-	TATA-less	1_mis	TFIID-dominated	TAF1-enriched	NA	TFIID
YDR367W	-2.23448	2.88909e-24	8.14479e-24	-3.46369	5.4721e-49	1.67335e-48	-2.96092	3.90226e-41	2.45061e-40	-4.58052	1.36609e-24	2.07593e-24	-1.01833	4.01317e-05	0.000144498	-1.92696	1.19127e-14	5.98471e-14	-1.62892	4.03599e-11	7.57024e-11	-2.45764	6.25135e-07	1.06521e-06	chrIV	1212848	1213614	767	+	TATA-less	1_mis	TFIID-dominated	TAF1-enriched	NA	TFIID
YDR368W	-2.42775	2.66047e-43	2.24455e-42	-4.17137	3.38356e-121	2.12916e-119	-2.67321	4.42325e-45	4.5782e-44	-4.22052	3.24278e-51	2.10593e-50	-0.301948	0.0216211	0.0345949	-1.16456	6.07329e-20	6.8729e-19	-0.994255	1.33964e-11	2.56817e-11	-1.03131	3.88386e-08	7.02649e-08	chrIV	1213904	1214842	939	+	TATA-less	2_mis	TFIID-dominated	TAF1-enriched	NA	TFIID
YDR369C	-1.91889	3.89047e-25	1.14921e-24	-3.70275	6.7332e-76	5.7801e-75	-2.66605	3.91949e-31	9.0151e-31	-4.29693	4.93849e-42	1.38191e-41	-0.687803	0.0179253	0.0292734	-2.46483	3.54098e-16	2.20796e-15	-2.25664	2.51911e-33	3.14551e-32	-2.97461	6.73937e-25	4.47599e-24	chrIV	1215016	1217580	2565	-	NA	NA	TFIID-dominated	NA	NA	TFIID
YDR370C	-1.35011	6.28931e-17	1.20005e-16	-2.10679	6.90311e-36	1.41847e-35	-2.16392	1.25184e-25	2.10957e-25	-3.80757	1.25567e-37	2.73488e-37	-0.475594	0.0443691	0.065583	-1.16998	9.15746e-07	1.77923e-06	-1.88635	1.66461e-20	5.60719e-20	-2.12499	2.85538e-14	7.49108e-14	chrIV	1217782	1219110	1329	-	TATA-containing	0_mis	TFIID-dominated	TAF1-enriched	NA	TFIID
YDR372C	-1.44032	4.23604e-15	7.40632e-15	-2.18059	4.75708e-32	8.92961e-32	-2.11737	8.76689e-23	1.34031e-22	-3.32105	6.75053e-39	1.56215e-38	-0.0829505	0.606235	0.656218	-0.53603	0.000808484	0.0012143	-0.826733	3.16209e-08	5.26585e-08	-1.0459	8.57656e-08	1.52706e-07	chrIV	1221112	1222149	1038	-	TATA-less	2_mis	TFIID-dominated	TAF1-enriched	NA	TFIID
YDR373W	-1.68836	6.75916e-17	1.28709e-16	-3.1684	2.02789e-51	6.76852e-51	-2.33052	5.42285e-27	9.74833e-27	-3.97247	2.85689e-45	1.02274e-44	-0.463469	0.0185837	0.0302191	-1.01639	9.42988e-08	2.01901e-07	-1.12932	7.98902e-12	1.54931e-11	-1.44378	4.16944e-10	8.43982e-10	chrIV	1222759	1223331	573	+	TATA-less	1_mis	TFIID-dominated	TAF1-depleted	NA	TFIID
YDR374C	0.750533	0.336127	0.380445	-0.242398	0.785678	0.807442	-0.123076	0.881157	0.901109	-1.28531	0.425152	0.464875	0.664307	0.267751	0.323746	-0.351348	0.554869	0.611113	-0.832593	0.355119	0.408086	-0.141486	0.912401	0.924593	chrIV	1223474	1224394	921	-	NA	NA	nocall	NA	NA	NA
YDR374W-A	-2.60833	1.02978e-15	1.85242e-15	-3.87942	2.43437e-25	3.9586e-25	-3.10324	2.40096e-15	3.19998e-15	-4.64387	7.31277e-15	9.97479e-15	-1.19299	0.00177813	0.00386269	-1.8026	3.24172e-06	5.92956e-06	-1.39825	0.000169581	0.000240603	-2.03001	2.72126e-08	4.95755e-08	chrIV	1224757	1225026	270	+	TATA-less	2_mis	NA	TAF1-enriched	NA	TFIID
YDR375C	-1.8414	3.01386e-21	7.14801e-21	-2.56294	6.44581e-38	1.39778e-37	-2.73306	1.57854e-37	6.53535e-37	-4.02133	7.12963e-41	1.85707e-40	-1.18858	3.44915e-07	2.26663e-06	-1.84002	5.24601e-16	3.18609e-15	-2.28289	1.35178e-23	5.83891e-23	-3.34445	6.65558e-20	2.71638e-19	chrIV	1225166	1226536	1371	-	TATA-less	1_mis	TFIID-dominated	TAF1-enriched	NA	TFIID
YDR376W	-2.08391	5.11953e-38	3.15498e-37	-3.14435	1.75268e-76	1.56125e-75	-2.75654	1.31779e-45	1.41189e-44	-3.99905	4.65481e-41	1.22523e-40	-1.14286	4.25302e-07	2.72347e-06	-1.72658	1.78266e-14	8.76718e-14	-2.01624	1.90682e-28	1.39179e-27	-2.45579	7.61799e-21	3.3799e-20	chrIV	1226822	1228303	1482	+	TATA-less	3_mis	TFIID-dominated	TAF1-enriched	NA	TFIID
YDR377W	-2.00159	5.80989e-25	1.70299e-24	-2.96856	8.04035e-50	2.54729e-49	-2.57684	6.90355e-30	1.46433e-29	-4.35786	1.16822e-56	1.38644e-55	-0.692497	4.61396e-06	2.19665e-05	-1.08274	1.12867e-12	4.31984e-12	-1.27517	3.54134e-10	6.37814e-10	-1.49033	5.9583e-14	1.52213e-13	chrIV	1228611	1228916	306	+	TATA-less	1_mis	TFIID-dominated	TAF1-depleted	NA	TFIID
YDR378C	-1.6664	9.64208e-15	1.65835e-14	-2.47752	4.78988e-29	8.37892e-29	-2.26804	6.01218e-21	8.76983e-21	-3.79076	2.71074e-30	4.60744e-30	-0.47956	0.0121473	0.0207152	-0.921458	1.17158e-06	2.24598e-06	-0.859552	8.47128e-06	1.26991e-05	-1.12872	1.17185e-08	2.17682e-08	chrIV	1229349	1229609	261	-	TATA-less	2_mis	TFIID-dominated	TAF1-enriched	NA	TFIID
YDR379C-A	-3.42656	8.20351e-23	2.13702e-22	-5.17739	2.98333e-28	5.1362e-28	-3.05184	6.75641e-14	8.87143e-14	-5.58412	2.34837e-16	3.24793e-16	-1.22307	0.00165197	0.00363325	-2.40559	4.07453e-09	1.01183e-08	-2.49217	1.14466e-06	1.77683e-06	-3.15724	8.77178e-09	1.64301e-08	chrIV	1233278	1233517	240	-	NA	NA	NA	NA	NA	NA
YDR379W	-1.36792	4.87783e-18	9.84609e-18	-2.41545	9.09452e-51	2.98608e-50	-2.56289	8.45836e-31	1.8967e-30	-4.05706	4.62631e-52	3.28619e-51	-0.546825	0.00591734	0.0110184	-1.47167	6.7248e-14	3.06102e-13	-2.1868	1.56798e-27	1.01794e-26	-2.58197	7.48644e-22	3.66566e-21	chrIV	1230167	1233196	3030	+	TATA-less	1_mis	TFIID-dominated	TAF1-enriched	NA	TFIID
YDR380W	-6.13081	3.05327e-131	1.2319e-128	-5.20316	9.18252e-81	9.71959e-80	-4.56401	3.32856e-14	4.38513e-14	-6.14126	3.56702e-68	1.66981e-66	-2.71068	5.95592e-08	4.78783e-07	-2.11593	2.24916e-05	3.80739e-05	-2.86808	5.29647e-14	1.14998e-13	-3.92165	1.04175e-33	1.85131e-32	chrIV	1234218	1236125	1908	+	NA	NA	SAGA-dominated	NA	NA	CR
YDR381C-A	-2.19477	2.56446e-14	4.32284e-14	-4.46387	4.22666e-38	9.20923e-38	-3.13768	5.36414e-37	2.08564e-36	-4.49271	3.8177e-26	5.95169e-26	-1.78961	2.19676e-05	8.50621e-05	-1.9255	1.89663e-06	3.55876e-06	-2.15365	1.44962e-15	3.40982e-15	-2.73834	2.87971e-14	7.55185e-14	chrIV	1238312	1238850	539	-	TATA-containing	0_mis	NA	TAF1-enriched	NA	TFIID
YDR381W	-2.65355	5.86616e-86	3.32529e-84	-2.23347	2.42925e-61	1.16682e-60	-1.89878	1.34026e-24	2.16345e-24	-5.56498	1.03898e-98	3.50189e-95	-1.85694	1.23523e-33	7.42746e-31	-1.93169	5.41526e-38	4.91961e-36	-1.86927	2.41177e-36	4.5234e-35	-2.56445	9.99555e-36	2.30357e-34	chrIV	1236558	1238004	1447	+	TATA-containing	0_mis	SAGA/TFIID-dominated	TAF1-depleted	NA	CR
YDR382W	-2.79725	1.27982e-44	1.16577e-43	-2.71137	1.80178e-41	4.33628e-41	-2.67035	3.37475e-35	1.09451e-34	-4.03625	2.11587e-54	1.95117e-53	-0.175594	0.174185	0.221292	0.0144607	0.910521	0.928405	-0.11073	0.4856	0.544213	-0.100386	0.559839	0.611603	chrIV	1239492	1239824	333	+	TATA-less	2_mis	TFIID-dominated	TAF1-depleted	RPG	TFIID
YDR383C	-1.295	7.95237e-07	1.06617e-06	-2.25801	7.82402e-16	1.10604e-15	-2.22448	9.4456e-19	1.31517e-18	-3.93223	3.82522e-22	5.63132e-22	-0.730792	0.0493226	0.0719672	-1.28846	0.000389859	0.000599452	-1.71661	2.99827e-10	5.41801e-10	-2.80355	5.72865e-09	1.08485e-08	chrIV	1239960	1240676	717	-	NA	NA	TFIID-dominated	NA	NA	TFIID
YDR384C	-3.44603	4.59003e-41	3.39623e-40	-3.38995	6.57397e-34	1.28721e-33	-3.49133	6.69114e-48	1.00622e-46	-4.85393	1.2979e-23	1.94685e-23	-1.73004	5.08723e-08	4.17319e-07	-1.43496	4.1557e-06	7.52352e-06	-2.09451	2.56096e-06	3.92669e-06	-2.54947	0.000559081	0.000816829	chrIV	1241204	1242031	828	-	TATA-less	1_mis	SAGA/TFIID-dominated	TAF1-depleted	NA	TFIID
[truncated: 3,921 more rows]
